# Supplementary material for: Dengue virus reduces AGPAT1 expression to alter phospholipids and enhance infection in Aedes aegypti
Source: PLoS Pathog. 2019 Dec 9;15(12):e1008199. doi: 10.1371/journal.ppat.1008199 (PMC6922471; doi:10.1371/journal.ppat.1008199)
Supplement: S9 Table — The table contains compound detected on cell with the following information: ionization mode (positive and negative), the mass average m/z between replicate, the retention time average Rt in minutes between replicates, the MS/MS spectrum fragmentation and intensity, adducts [M+H]+ and [M-H]-, metabolites of importance in Fig 4E, regulated compound with abundance between dsAGPAT1 and dsControl samples (p-value < 0.05, |log2 fold change| ≥ 1) and annotation classes with the first 3 ranks of identification by MS-Finder. (XLSX) [file ppat.1008199.s020.xlsx]

## Sheet: Table S9
METABOLOMIC ANALYSIS OF DENV-INFECTED MOSQUITO AFTER AGPAT1 DEPLETION COMPARED TO DSCONTROL
							Red shows significantly regulated metabolite abundance between dsAGPAT and dsControl samples (p-value < 0.05, log2 fold change ≥ 1 or ≤ -1)
							dsAGPAT1 vs dsControl		Annotation
Ionization mode	Average Mz	Average Rt(min)	MS/MS spectrum	Adduct ion name	Metabolites in Fig 4E	Regulated compound	p-value	Log2 (FC)	Classes	Ontology 1	Ontology 2	Ontology 3	Structure rank 1	Structure rank 2	Structure rank 3	Databases 1	Databases 2	Databases 3	Formula 1	Formula 2	Formula 3	Total score 1	Total score 2	Total score 3
Positive	109.028	0.7	53.01676:68 81.08133:1440 94.09398:286	[M+H]+			0.069689	0.9571	Benzenoid	P-benzoquinones	O-benzoquinones	1,2-diols	Quinone	1,2-Benzoquinone	(R)-monothioglycerol	HMDB=HMDB0003364,ChEBI=CHEBI:16509,SMPDB=PW_C001860,YMDB=YMDB00155,T3DB=T3D4578,FooDB=FDB005755,STOFF=STOFF_7084,BMDB=BMDB03364,Urine=HMDB0003364,PubChem=4650,UNPD=UNPD191854	HMDB=HMDB0012133,ChEBI=CHEBI:17253,FooDB=FDB004549,BMDB=BMDB12133,PubChem=11421,PlantCyc=CPD-385	ChEBI=CHEBI:45619;CHEBI:74537,DrugBank=DB03864	C6H4O2	C6H4O2	C3H8O2S	6.7271	6.7271	5.6529
Positive	110.071	14.51	83.02155:3619 93.00281:5996	[M+H]+			0.12204	2.1738	Other	Substituted pyrroles	Aminopyridines and derivatives	Aminopyridines and derivatives	Brunfelsamidine	2,4-diaminopyridine	amifampridine	KNApSAcK=C00002024,ChEBI=CHEBI:3195,UNPD=UNPD110229	ChEBI=CHEBI:51599	ChEBI=CHEBI:135948	C5H7N3	C5H7N3	C5H7N3	7.1464	7.1035	7.1035
Positive	116.07	0.73	97.99074:349	[M+H]+			0.099507	1.0212	Amino acid	Proline and derivatives	Gamma amino acids and derivatives	Alpha amino acids	L-Proline	4-Amino-2-methylenebutanoic acid	(+)-(1S,2S)-norcoronamic acid	HMDB=HMDB0000162;HMDB0003411,KNApSAcK=C00001388,ChEBI=CHEBI:16313;CHEBI:17203;CHEBI:60039;CHEBI:26271;CHEBI:32862;CHEBI:32864;CHEBI:32867;CHEBI:32868;CHEBI:32871;CHEBI:32872;CHEBI:57726,DrugBank=DB00172;DB02853,SMPDB=PW_C000106;PW_C001878,YMDB=YMDB00378;YMDB00903,T3DB=T3D4411,FooDB=FDB000570;FDB023166;FDB030009,BMDB=BMDB00162;BMDB03411,Urine=HMDB0000162;HMDB0003411,Saliva=HMDB0000162,Feces=HMDB00…	HMDB=HMDB0030409,FooDB=FDB002271,UNPD=UNPD121459	ChEBI=CHEBI:87174	C5H9NO2	C5H9NO2	C5H9NO2	8.8454	8.4576	8.4514
Positive	119.085	1.92	79.22926:73 91.12636:976	[M+H]+			0.7231	0.11654	Amino acid	Alpha amino acids	Dialkylthioethers	Alkylthiols	2,4-Diaminobutyric acid	Dipropyl sulfide	1-Hexanethiol	HMDB=HMDB0002362;HMDB0006284,KNApSAcK=C00001353;C00034868,ChEBI=CHEBI:16028;CHEBI:48950;CHEBI:58761;CHEBI:64307,DrugBank=DB03817,FooDB=FDB012588;FDB022978;FDB030953,BMDB=BMDB06284,LipidMAPS=LMFA01100052,Urine=HMDB0002362;HMDB0006284,Feces=HMDB0002362,Serum=HMDB0002362;HMDB0006284,PubChem=6971272;134490,PlantCyc=CPD-470,UNPD=UNPD152775;UNPD54736	HMDB=HMDB0031431,FooDB=FDB003594,UNPD=UNPD160904	HMDB=HMDB0039806,FooDB=FDB019456,UNPD=UNPD153138	C4H10N2O2	C6H14S	C6H14S	7.6297	7.3104	7.2401
Positive	120.081	9	93.15901:386 102.98399:374	[M+H]+			0.12823	1.4342	Other	Indolines			indoline			ChEBI=CHEBI:43295			C8H9N			7.5909
Positive	135.08	1.92	67.07729:59 79.16664:188 93.07802:117 107.02151:19882 117.13211:104	[M+H]+			0.95633	-0.016573	Other	Alkylthiols	1-hydroxy-2-unsubstituted benzenoids	Styrenes	3-Mercapto-1-hexanol	Chavicol	(Z)-4-(1-Propenyl)phenol	HMDB=HMDB0040152,ChEBI=CHEBI:77690,YMDB=YMDB01417,FooDB=FDB019850;FDB019851;FDB019853;FDB019855;FDB019857,LipidMAPS=LMFA05000539,UNPD=UNPD1536;UNPD59421	HMDB=HMDB0034107,KNApSAcK=C00000621,ChEBI=CHEBI:50158,FooDB=FDB012373,PubChem=68148,PlantCyc=CPD-6483,UNPD=UNPD101229	HMDB=HMDB0030839,ChEBI=CHEBI:73343,FooDB=FDB002795;FDB011918,PubChem=5474441,PlantCyc=CPD-9933,UNPD=UNPD112001	C6H14OS	C9H10O	C9H10O	8.7996	8.6896	8.548
Negative	136.044	0.89	64.96621:281	[M-H]-			0.1153	-1.3272	Pyridine	Pyridines and derivatives	Aminobenzoic acids	Aminobenzoic acids	3-Pyridylacetic acid	p-Aminobenzoic acid	2-Aminobenzoic acid	HMDB=HMDB0001538,ChEBI=CHEBI:86390,FooDB=FDB022679,BMDB=BMDB01538,Serum=HMDB0001538,PubChem=4615299	HMDB=HMDB0001392,KNApSAcK=C00001401,ChEBI=CHEBI:17836;CHEBI:30753,DrugBank=DB02362,YMDB=YMDB00493,FooDB=FDB001037;FDB030487,STOFF=STOFF_7410,BMDB=BMDB01392,Urine=HMDB0001392,Feces=HMDB0001392,ECMDB=ECMDB01392,Serum=HMDB0001392,PubChem=4876;978,PlantCyc=P-AMINO-BENZOATE,UNPD=UNPD178955	HMDB=HMDB0001123,KNApSAcK=C00007382,ChEBI=CHEBI:16567;CHEBI:30754,DrugBank=DB04056;DB04166,SMPDB=PW_C000877,YMDB=YMDB00278,T3DB=T3D4165,FooDB=FDB000896;FDB030679,NANPDB=NANPDB_3852,STOFF=STOFF_7408,BMDB=BMDB01123,Urine=HMDB0001123,Feces=HMDB0001123,ECMDB=ECMDB01123,CSF=HMDB0001123,Serum=HMDB0001123,PubChem=5459842;227,PlantCyc=ANTHRANILATE,UNPD=UNPD99279	C7H7NO2	C7H7NO2	C7H7NO2	7.2407	7.1573	7.1573
Positive	136.061	3.57	119.10364:62	[M+H]+			0.1153	0.65496	Purine	6-aminopurines	L-alpha-amino acids	Purines and purine derivatives	Adenine	(+)-threo-2-Amino-3,4-dihydroxybutanoic acid	2-aminopurine	HMDB=HMDB0000034,KNApSAcK=C00001490,ChEBI=CHEBI:16708,DrugBank=DB00173,SMPDB=PW_C000024,YMDB=YMDB00887,T3DB=T3D4279,STOFF=STOFF_617,BMDB=BMDB00034,Urine=HMDB0000034,Saliva=HMDB0000034,Feces=HMDB0000034,ECMDB=ECMDB00034,CSF=HMDB0000034,Serum=HMDB0000034,PubChem=190,PlantCyc=ADENINE,UNPD=UNPD128555	HMDB=HMDB0029389,ChEBI=CHEBI:28330;CHEBI:60904,YMDB=YMDB00494,FooDB=FDB000470,LipidMAPS=LMFA01050439,ECMDB=ECMDB20092,PubChem=193577,UNPD=UNPD11941;UNPD175547;UNPD39325;UNPD66928	ChEBI=CHEBI:479072	C5H5N5	C4H9NO4	C5H5N5	9.1918	8.9117	8.775
Positive	136.076	11.34	108.06831:65 109.14125:134 118.99922:13946	[M+H]+			0.024625	-0.83146	Other	Phenoxy compounds	Alkyl-phenylketones	Phenylacetamides	phenyl acetimidate	2'-Aminoacetophenone	2-Phenylacetamide	ChEBI=CHEBI:52478	HMDB=HMDB0032630,ChEBI=CHEBI:91110,FooDB=FDB010574,UNPD=UNPD44850	HMDB=HMDB0010715,ChEBI=CHEBI:16562,FooDB=FDB027865,BMDB=BMDB10715,PubChem=7680,PlantCyc=CPD-238,UNPD=UNPD169146	C8H9NO	C8H9NO	C8H9NO	8.8089	8.5199	8.4537
Positive	137.046	4.14	109.85104:62 119.05724:175	[M+H]+			0.07415	3.8513	Other	Hypoxanthines	Pyrazolo[3,4-d]pyrimidines	Pyrazolopyrimidines	Hypoxanthine	Allopurinol	3H-pyrazolo[4,3-d]pyrimidin-7-ol	HMDB=HMDB0000157,KNApSAcK=C00001502,ChEBI=CHEBI:17368,SMPDB=PW_C000102,YMDB=YMDB00555,T3DB=T3D4150,FooDB=FDB003949,STOFF=STOFF_8667,BMDB=BMDB00157,Urine=HMDB0000157,Saliva=HMDB0000157,Feces=HMDB0000157,ECMDB=ECMDB00157,CSF=HMDB0000157,Serum=HMDB0000157,PubChem=790,PlantCyc=HYPOXANTHINE,UNPD=UNPD77089	HMDB=HMDB0014581,ChEBI=CHEBI:40279,DrugBank=DB00437,T3DB=T3D3477,STOFF=STOFF_2551,Urine=HMDB0014581,Serum=HMDB0014581,PubChem=2094,PlantCyc=CPD-9024	ChEBI=CHEBI:44995,DrugBank=DB03153	C5H4N4O	C5H4N4O	C5H4N4O	8.9576	8.7512	8.4169
Positive	141	0.92	77.04864:26490 81.08432:87 95.05017:545 105.03023:78 108.97058:227 118.13525:305 123.04082:120	[M+H]+			0.074548	-0.89607	Organic acid	Organic phosphonic acids	Monoalkyl phosphates	Acyl monophosphates	Phosphonoacetate	glycolaldehyde phosphate(2-)	Acetylphosphate	HMDB=HMDB0004110,ChEBI=CHEBI:15732;CHEBI:57488,DrugBank=DB02823,FooDB=FDB023313,BMDB=BMDB04110,PubChem=25244968;546,PlantCyc=CPD-764,UNPD=UNPD129788	ChEBI=CHEBI:133927;CHEBI:136456	HMDB=HMDB0001494,KNApSAcK=C00019559,ChEBI=CHEBI:15350;CHEBI:13711;CHEBI:22191,DrugBank=DB02897,SMPDB=PW_C001151,FooDB=FDB022653,BMDB=BMDB01494,ECMDB=ECMDB01494,PubChem=4183249;186,PlantCyc=ACETYL-P	C2H5O5P	C2H5O5P	C2H5O5P	7.2578	6.5287	5.9173
Positive	145.049	12.59	54.91751:67 68.9509:446 71.06196:101 72.98702:263 85.03636:2125 103.91211:113 108.90356:250 115.18643:100 127.0583:8995	[M+H]+			0.052032	-0.3674	Fatty acid	Medium-chain fatty acids	Methyl-branched fatty acids	Medium-chain fatty acids	trans-2-Hexenedioic acid	3-Methylglutaconic acid	3-Hexenedioic acid	HMDB=HMDB0013311,ChEBI=CHEBI:36192;CHEBI:49296,FooDB=FDB029375,LipidMAPS=LMFA01170070,Urine=HMDB0013311,UNPD=UNPD169139	HMDB=HMDB0000522,ChEBI=CHEBI:37245,T3DB=T3D4265,FooDB=FDB022090,BMDB=BMDB00522,LipidMAPS=LMFA01170068,Urine=HMDB0000522,CSF=HMDB0000522,UNPD=UNPD145288;UNPD43669	HMDB=HMDB0000393,ChEBI=CHEBI:86952;CHEBI:87166,FooDB=FDB022011,BMDB=BMDB00393,LipidMAPS=LMFA01170087	C6H8O4	C6H8O4	C6H8O4	9.5929	9.5472	9.3846
Positive	148.059	14.23	56.09027:94 84.06786:7287 85.02901:103 129.9839:60250 131.11551:427	[M+H]+			0.44522	-0.27655	Amino acid	L-alpha-amino acids	Glutamic acid and derivatives	Aspartic acid and derivatives	L-4-Hydroxyglutamate semialdehyde	L-Glutamic acid	N-Methyl-D-aspartic acid	HMDB=HMDB0006556,ChEBI=CHEBI:27809;CHEBI:62637,SMPDB=PW_C002808,YMDB=YMDB00720,FooDB=FDB023970,BMDB=BMDB06556,ECMDB=ECMDB06556,PubChem=25201126;440851	HMDB=HMDB0000148;HMDB0003339;HMDB0060475,KNApSAcK=C00001358;C00019577,ChEBI=CHEBI:15966;CHEBI:16015;CHEBI:18237;CHEBI:29985;CHEBI:29986;CHEBI:14321;CHEBI:29987;CHEBI:29988;CHEBI:29989;CHEBI:76051,DrugBank=DB00142;DB02517,SMPDB=PW_C000095;PW_C001849,YMDB=YMDB00271,T3DB=T3D4296,FooDB=FDB012534;FDB012535;FDB012536;FDB020170;FDB020321;FDB020322;FDB023148;FDB030962,STOFF=STOFF_297,BMDB=BMDB00148;BMDB0…	HMDB=HMDB0002393,ChEBI=CHEBI:31882,FooDB=FDB022992,BMDB=BMDB02393,PubChem=22880,UNPD=UNPD133883;UNPD42466	C5H9NO4	C5H9NO4	C5H9NO4	8.4671	8.4572	8.4029
Negative	148.113	0.87	92.12599:128	[M-H]-			0.14342	-1.24	Other	Amphetamines and derivatives	Amphetamines and derivatives	Aniline and substituted anilines	Phentermine	Methamphetamine	2,6-Diethylaniline	HMDB=HMDB0014337,ChEBI=CHEBI:8080;CHEBI:50508,DrugBank=DB00191,T3DB=T3D2709,STOFF=STOFF_1227,Urine=HMDB0014337,Serum=HMDB0014337,UNPD=UNPD109992	HMDB=HMDB0015517,KNApSAcK=C00042732,ChEBI=CHEBI:6809;CHEBI:132297;CHEBI:136013,DrugBank=DB01577,T3DB=T3D3052,STOFF=STOFF_758;STOFF_3373,Urine=HMDB0015517,Serum=HMDB0015517	HMDB=HMDB0032782,T3DB=T3D4868,FooDB=FDB010752	C10H15N	C10H15N	C10H15N	7.4846	7.4223	7.0827
Positive	152.056	9.93	135.03415:911	[M+H]+			0.041171	0.96251	Purine	Purinones	Purines and purine derivatives	6-aminopurines	8-Hydroxyadenine	Guanine	2-Hydroxyadenine	HMDB=HMDB0000542,KNApSAcK=C00043227,ChEBI=CHEBI:134104;CHEBI:134105,FooDB=FDB022105,BMDB=BMDB00542,UNPD=UNPD55975	HMDB=HMDB0000132,KNApSAcK=C00001501,ChEBI=CHEBI:16235,SMPDB=PW_C000086,YMDB=YMDB00698,FooDB=FDB004222;FDB006726,STOFF=STOFF_8655,BMDB=BMDB00132,Urine=HMDB0000132,Saliva=HMDB0000132,Feces=HMDB0000132,ECMDB=ECMDB00132,PubChem=764,PlantCyc=GUANINE,UNPD=UNPD47403	HMDB=HMDB0000403,KNApSAcK=C00050937,ChEBI=CHEBI:62462,FooDB=FDB022019,BMDB=BMDB00403,Urine=HMDB0000403,UNPD=UNPD180145	C5H5N5O	C5H5N5O	C5H5N5O	8.8841	8.8681	8.8577
Negative	154.974	2.83	59.00318:187 61.07485:202 112.94925:396	[M-H]-			0.058011	-0.79405	No annotation
Negative	156.013	0.68	92.06552:98	[M-H]-			0.58342	-0.54533	Other	Nitroaromatic compounds	Triazinones		5-nitrouracil	5-azaorotic acid		ChEBI=CHEBI:60763	ChEBI=CHEBI:30863,DrugBank=DB03209,STOFF=STOFF_8359		C4H3N3O4	C4H3N3O4		6.0857	4.9717
Positive	156.076	14.49	81.20937:55 83.10626:606 93.09615:865 95.06042:1865 125.93617:69 138.09111:508 139.15346:54	[M+H]+			0.12862	1.8621	Amino acid	Histidine and derivatives	L-alpha-amino acids	Histidine and derivatives	L-Histidine	L-2-Amino-3-(1-pyrazolyl)propanoic acid	L-histidinate(2-)	HMDB=HMDB0000177,KNApSAcK=C00001363,ChEBI=CHEBI:15971;CHEBI:27570;CHEBI:27947;CHEBI:32510;CHEBI:32512;CHEBI:32513;CHEBI:32523;CHEBI:32526;CHEBI:32527;CHEBI:32529;CHEBI:32531;CHEBI:32532;CHEBI:57595,DrugBank=DB00117,SMPDB=PW_C000116,YMDB=YMDB00369;YMDB00794,T3DB=T3D4363,FooDB=FDB011856,STOFF=STOFF_3295;STOFF_8623,BMDB=BMDB00177,Urine=HMDB0000177,Saliva=HMDB0000177,Feces=HMDB0000177,ECMDB=ECMDB0017…	HMDB=HMDB0034267,KNApSAcK=C00001390,ChEBI=CHEBI:16357;CHEBI:57747,FooDB=FDB012598,PubChem=25203312,PlantCyc=CPD-670,UNPD=UNPD166609	ChEBI=CHEBI:32511;CHEBI:32524;CHEBI:32530	C6H9N3O2	C6H9N3O2	C6H9N3O2	8.8724	8.8536	8.4557
Positive	158.027	0.9	102.15219:974 140.92058:40666	[M+H]+			0.0888	-0.87086	Other	Nitroaromatic compounds	Triazinones		5-nitrouracil	5-azaorotic acid		ChEBI=CHEBI:60763	ChEBI=CHEBI:30863,DrugBank=DB03209,STOFF=STOFF_8359		C4H3N3O4	C4H3N3O4		7.5444	7.3425
Negative	161.046	0.7	143.02177:57	[M-H]-			0.038368	0.2189	Other	Medium-chain hydroxy acids and derivatives	Medium-chain fatty acids	Hydroxy fatty acids	3-Hydroxyadipic acid	2-Hydroxyadipic acid	2-Hydroxy-2-ethylsuccinic acid	HMDB=HMDB0000345,ChEBI=CHEBI:89205,FooDB=FDB021968,BMDB=BMDB00345,LipidMAPS=LMFA01170088,Urine=HMDB0000345,Serum=HMDB0000345	HMDB=HMDB0000321;HMDB0000368,ChEBI=CHEBI:17023;CHEBI:55541;CHEBI:55543;CHEBI:57987,T3DB=T3D4258,FooDB=FDB021947;FDB021987,BMDB=BMDB00321;BMDB00368,LipidMAPS=LMFA01170049;LMFA01170050,Urine=HMDB0000321,Feces=HMDB0000321,Serum=HMDB0000321	HMDB=HMDB0059758,ChEBI=CHEBI:15583;CHEBI:57423;CHEBI:89897,LipidMAPS=LMFA01050454,Urine=HMDB0059758,PubChem=439736	C6H10O5	C6H10O5	C6H10O5	9.3003	9.2793	9.2738
Positive	165.055	11.34	91.10567:609 109.17862:122 123.06897:1546 137.1093:195 146.96684:20397 148.22139:56	[M+H]+			0.022765	-0.9511	Other	Cinnamaldehydes	Cinnamaldehydes	1-hydroxy-4-unsubstituted benzenoids	(2E)-3-(3,4-dihydroxyphenyl)prop-2-enal	3-(2,3-dihydroxyphenyl)prop-2-enal	3-(2-hydroxyphenyl)oxirane-2-carbaldehyde	HMDB=HMDB0141767,KNApSAcK=C00007511,ChEBI=CHEBI:28323,PubChem=5281871;443034,UNPD=UNPD142122;UNPD71218;UNPD220386	HMDB=HMDB0134029	HMDB=HMDB0134031	C9H8O3	C9H8O3	C9H8O3	8.5712	8.1546	8.0935
Positive	166.052	13.5	56.16175:2272 73.96181:9410 74.99535:20309 99.03922:82 100.114:146 102.0507:1209 131.04503:1441 135.96371:52 147.96902:1389 148.97528:15438	[M+H]+			0.98025	0.0065707	Amino acid	Alpha amino acids	Benzoxazinones	Alpha amino acids	Methionine sulfoxide	(R)-2-Hydroxy-2H-1,4-benzoxazin-3(4H)-one	Ethiin	HMDB=HMDB0002005,ChEBI=CHEBI:17016;CHEBI:49031;CHEBI:49032;CHEBI:49033;CHEBI:49034;CHEBI:49035;CHEBI:49036;CHEBI:58772;CHEBI:58773,DrugBank=DB02235;DB02467,SMPDB=PW_C001342,YMDB=YMDB00035,FooDB=FDB022789,BMDB=BMDB02005,Urine=HMDB0002005,Saliva=HMDB0002005,Feces=HMDB0002005,ECMDB=ECMDB02005;ECMDB20295,Serum=HMDB0002005,PubChem=10909908;10062737;158980;847,PlantCyc=CPD-8990,UNPD=UNPD15039	HMDB=HMDB0038318,KNApSAcK=C00036489,ChEBI=CHEBI:63559,FooDB=FDB017651,PubChem=322636,PlantCyc=CPD-6364,UNPD=UNPD16130	HMDB=HMDB0037057,FooDB=FDB016040,PubChem=91820395,PlantCyc=CPD-9280,UNPD=UNPD26717	C5H11NO3S	C8H7NO3	C5H11NO3S	8.5785	8.2795	8.1002
Positive	168.075	13.97	77.048:73 83.08188:125 94.99051:20826 97.13081:171 107.08472:1216 109.10349:70 126.98357:148 150.07788:83 150.96135:390	[M+H]+			0.83635	0.042354	Benzenoid	M-methoxybenzoic acids and derivatives	1-hydroxy-2-unsubstituted benzenoids	Acyloins	3-Methoxyanthranilate	1-aci-nitro-2-(4-hydroxyphenyl)ethane	Myrothenone A;(+)-Myrothenone A	HMDB=HMDB0060374,ChEBI=CHEBI:27440;CHEBI:20109,PubChem=255720,UNPD=UNPD190199	ChEBI=CHEBI:136446	KNApSAcK=C00032047,ChEBI=CHEBI:66424,UNPD=UNPD88968	C8H9NO3	C8H9NO3	C8H9NO3	8.1234	8.0706	8.0464
Positive	173.139	10.27	113.19737:2358 114.0983:1231 115.03511:1085 131.1201:173 156.07799:15323	[M+H]+		yes	0.035518	1.0664	Other	Acetamides	Naphthalenes	Naphthalenes	C00050425	1,2-Dihydro-1,1,6-trimethylnaphthalene	1,1,5-trimethyl-1,2-dihydronaphthalene	KNApSAcK=C00050425,ChEBI=CHEBI:2412	HMDB=HMDB0040284,ChEBI=CHEBI:89773,YMDB=YMDB01576,FooDB=FDB020005,Urine=HMDB0040284,UNPD=UNPD134768	ChEBI=CHEBI:87298	C7H16N4O	C13H16	C13H16	8.0024	7.5807	7.164
Positive	175.119	19.7	60.00648:15203 70.115:4410 71.00452:192 72.12143:541 88.08708:127 97.17813:100 98.23839:138 112.15097:2424 113.05507:219 114.17355:1172 115.0984:965 115.96967:17160 140.12593:863 141.18251:141 157.07883:19897 158.06886:27072 158.93828:75	[M+H]+			0.066512	0.54879	Amino acid	L-alpha-amino acids	Arginine and derivatives	Arginine and derivatives	L-Arginine	Arginine hydrochloride	Arginine glutamate	HMDB=HMDB0000517;HMDB0003416;HMDB0062762,KNApSAcK=C00001340,ChEBI=CHEBI:15816;CHEBI:16467;CHEBI:29016;CHEBI:32682;CHEBI:32681;CHEBI:32683;CHEBI:32688;CHEBI:32689;CHEBI:32690;CHEBI:32695;CHEBI:32696;CHEBI:32697,DrugBank=DB00125;DB04027,SMPDB=PW_C000396;PW_C001880,YMDB=YMDB00592,T3DB=T3D4289,FooDB=FDB002257;FDB023167;FDB030954,STOFF=STOFF_6956,BMDB=BMDB00517;BMDB03416,Urine=HMDB0000517,Saliva=HMDB0…	ChEBI=CHEBI:31235,FooDB=FDB011914	ChEBI=CHEBI:31234	C6H14N4O2	C6H14N4O2	C6H14N4O2	8.971	8.5544	8.5544
Positive	178.05	9.67	110.0912:438 114.04694:109 160.0442:561 178.05904:156	[M+H]+			0.78493	-0.18471	Amino acid	L-alpha-amino acids	Methionine and derivatives	Alpha amino acids	(R)C(S)S-Alliin	N-Formyl-L-methionine	Cycloalliin	HMDB=HMDB0033592,KNApSAcK=C00001336,ChEBI=CHEBI:2596;CHEBI:132987,FooDB=FDB000558;FDB011674,PubChem=25200619,PlantCyc=CPD-9269,UNPD=UNPD104576	HMDB=HMDB0001015,ChEBI=CHEBI:16552;CHEBI:57809,DrugBank=DB04464,FooDB=FDB022372,BMDB=BMDB01015,Urine=HMDB0001015,Feces=HMDB0001015,PubChem=439750	HMDB=HMDB0029417,FooDB=FDB000512,UNPD=UNPD143857;UNPD169800	C6H11NO3S	C6H11NO3S	C6H11NO3S	8.0214	7.9607	7.9477
Positive	182.081	11.33	91.07455:155 119.04128:1277 123.07083:66 141.08771:58 147.06978:103 165.1084:30683	[M+H]+		yes	0.022765	-1.0536	Amino acid	Phenylalanine and derivatives	Tyrosine and derivatives	Phenylalanine and derivatives	Meta-Tyrosine	L-Tyrosine	o-Tyrosine	HMDB=HMDB0059720,ChEBI=CHEBI:44303;CHEBI:78290,DrugBank=DB02387;DB03552,UNPD=UNPD93879	HMDB=HMDB0000158,KNApSAcK=C00001397,ChEBI=CHEBI:17895;CHEBI:18186;CHEBI:28479;CHEBI:32760;CHEBI:32761;CHEBI:32762;CHEBI:32773;CHEBI:32774;CHEBI:32775;CHEBI:32784;CHEBI:32785;CHEBI:32786;CHEBI:58315;CHEBI:58570,DrugBank=DB00135;DB03839,SMPDB=PW_C000103,YMDB=YMDB00364;YMDB00805,T3DB=T3D4371,FooDB=FDB000446,STOFF=STOFF_8573,BMDB=BMDB00158,Urine=HMDB0000158,Saliva=HMDB0000158,Feces=HMDB0000158,ECMDB=…	HMDB=HMDB0006050,ChEBI=CHEBI:91037;CHEBI:91038;CHEBI:91041,FooDB=FDB023822,BMDB=BMDB06050,Urine=HMDB0006050,Feces=HMDB0006050,Serum=HMDB0006050,UNPD=UNPD56807	C9H11NO3	C9H11NO3	C9H11NO3	8.7712	8.7712	8.7712
Positive	184.073	14.76	60.06426:3398 71.13691:1054 85.96184:27021 86.79152:57 99.05801:60 104.13991:344 124.90981:9024 156.14723:266 166.15039:1085 183.98308:307	[M+H]+			0.24275	0.50832	Pyrimidine	Hydroxypyrimidines	Pyrimidinecarboxylic acids	Nitrobenzenes	2,6-Diamino-4-hydroxy-5-N-methylformamidopyrimidine	ethyl 2-amino-4-hydroxypyrimidine-5-carboxylate	4-amino-2-hydroxylamino-6-nitrotoluene	HMDB=HMDB0011657,ChEBI=CHEBI:28643,FooDB=FDB028348,BMDB=BMDB11657	ChEBI=CHEBI:39721,DrugBank=DB06906	ChEBI=CHEBI:20307,PubChem=9543061	C6H9N5O2	C7H9N3O3	C7H9N3O3	7.4761	7.3173	6.6953
Positive	188.071	9.98	117.1821:111 118.04245:700 146.16924:7224 160.02422:709 169.98372:1855 178.00526:98 188.082:57	[M+H]+			0.39155	0.88209	Other	Indoles	Indoles	Hydroxyquinolines	1-acetylindole-3-carboxaldehyde	Indoleacrylic acid	Quinacetol sulfate	ChEBI=CHEBI:133207,UNPD=UNPD195273	HMDB=HMDB0000734,ChEBI=CHEBI:90333,BMDB=BMDB00734	ChEBI=CHEBI:82085	C11H9NO2	C11H9NO2	C11H9NO2	7.4818	7.4162	7.0699
Negative	204.03	9.64	116.11578:112	[M-H]-			0.77385	0.32769	Organic acid	Quinoline carboxylic acids	Quinoline carboxylic acids	N-acyl-alpha amino acids	4,6-Dihydroxy-2-quinolinecarboxylic acid	2-hydroxy-4-quinolone-3-carboxylic acid	dacisteine	HMDB=HMDB0033528,KNApSAcK=C00001540,ChEBI=CHEBI:2195,FooDB=FDB011585,PubChem=440752,UNPD=UNPD156697	ChEBI=CHEBI:74804	ChEBI=CHEBI:134905	C10H7NO4	C10H7NO4	C7H11NO4S	8.2687	7.9264	7.9084
Positive	204.123	12.79	60.16823:1166 85.02966:13643 96.13686:67 114.01419:211 126.13878:57 138.11069:190 144.36508:1204 144.98671:8376 168.09306:123 186.21609:96	[M+H]+			0.07415	1.2897	Acyl carnitine	Acyl carnitines	C-glycosyl compounds	Leucine and derivatives	L-Acetylcarnitine	2-[(2R,5R,6S)-5-amino-6-(hydroxymethyl)-2-oxanyl]acetic acid methyl ester	N-lactoyl-Leucine	HMDB=HMDB0000201,ChEBI=CHEBI:15960;CHEBI:57589;CHEBI:73024;CHEBI:86045,DrugBank=DB08842,SMPDB=PW_C000129,YMDB=YMDB00351;YMDB00617,FooDB=FDB021904,BMDB=BMDB00201,LipidMAPS=LMFA07070049;LMFA07070050;LMFA07070060,Urine=HMDB0000201,Saliva=HMDB0000201,Feces=HMDB0000201,CSF=HMDB0000201,Serum=HMDB0000201,PubChem=7045767;439756;1,UNPD=UNPD80983	ChEBI=CHEBI:100791;CHEBI:103090;CHEBI:103219	HMDB=HMDB0062176,Serum=HMDB0062176,UNPD=UNPD230149	C9H17NO4	C9H17NO4	C9H17NO4	8.5791	7.7149	7.521
Positive	206.102	15.29	62.07296:238 72.09993:710 73.99448:500 86.11925:1461 97.1516:1467 98.12338:411 98.94987:52 100.011:1963 102.09175:78 103.09708:61 112.08087:127 116.05684:460 123.99272:52 126.08813:256 126.94891:116 128.16647:1399 130.03098:113 140.01929:3888 142.10086:306 145.20412:62 152.02974:253 170.17163:1625 188.00464:12849	[M+H]+			0.21266	6.4697	Carbohydrate	Hexoses	Hexoses	Tropane alkaloids	4-acetamido-4,6-dideoxy-D-galactose	N-acetyl-D-quinovosamine	N-Methylcalystegine C1	ChEBI=CHEBI:73783	ChEBI=CHEBI:59277;CHEBI:79971,UNPD=UNPD112657;UNPD186850	HMDB=HMDB0036394,FooDB=FDB015273,UNPD=UNPD168535	C8H15NO5	C8H15NO5	C8H15NO5	7.8367	7.8187	7.8162
Positive	208.06	11.08	98.9408:66 110.04279:4121 120.08426:907 133.88998:95 136.21507:63 138.09346:162 144.19716:56 145.07271:97 147.95708:100 152.04987:163 165.94514:1057 172.02325:69 180.06186:4273 190.04893:2459 191.07501:79	[M+H]+			0.084647	0.91636	Other	Nitronaphthalenes	7-hydroxycoumarins	Alpha amino acids and derivatives	1-Nitro-5,6-dihydroxy-dihydronaphthalene	3-amino-4,7-dihydroxy-8-methylcoumarin	4-(ethoxymethylene)-2-(2-furyl)oxazol-5-one	HMDB=HMDB0060328,ChEBI=CHEBI:34099,PubChem=11954052	ChEBI=CHEBI:74154,PubChem=54691342	ChEBI=CHEBI:53580	C10H9NO4	C10H9NO4	C10H9NO4	8.3344	7.9092	7.826
Positive	212.095	11.69	70.09467:230 71.99341:3307 88.05883:51 90.13412:7531 122.98247:3376 130.03752:79 149.94435:51 212.00826:100	[M+H]+			0.099507	-0.76973	Amino acid	Tyrosine and derivatives	Phenylpropanoic acids	Tyrosine and derivatives	3-Methoxytyrosine	Methyldopa	5-hydroxy-3-methyl-L-tyrosine zwitterion	HMDB=HMDB0001434;HMDB0060747,ChEBI=CHEBI:82913;CHEBI:133668,T3DB=T3D4297,FooDB=FDB022620,BMDB=BMDB01434,Urine=HMDB0001434;HMDB0060747,CSF=HMDB0001434,Serum=HMDB0001434;HMDB0060747,PubChem=25273143;9307,PlantCyc=CPD-11496,UNPD=UNPD162878	HMDB=HMDB0011754,ChEBI=CHEBI:61058,DrugBank=DB00968,T3DB=T3D3577,FooDB=FDB028425,STOFF=STOFF_3381,BMDB=BMDB11754,Urine=HMDB0011754	ChEBI=CHEBI:78241;CHEBI:79077,PubChem=86289483	C10H13NO4	C10H13NO4	C10H13NO4	8.3343	8.3111	7.8968
Positive	216.062	14.47	97.04442:458 125.93166:401 127.12418:92 150.15822:212 156.14401:279 159.00005:58 160.02538:689 186.0546:92 197.93382:8248	[M+H]+			0.051766	-0.93577	Glycerophosphate	Glycerophosphoethanolamines	Organic phosphoramides	Furanoquinolines	sn-glycero-3-Phosphoethanolamine	Glycerylphosphorylethanolamine	Robustine;(-)-Rutacridone	HMDB=HMDB0059660,ChEBI=CHEBI:16929;CHEBI:52330;CHEBI:57952,DrugBank=DB03484,YMDB=YMDB00757,PubChem=70678815;25200464;5459861;444183,PlantCyc=L-1-GLYCEROPHOSPHORYLETHANOL-AMINE,UNPD=UNPD37320	HMDB=HMDB0000114,SMPDB=PW_C000072,FooDB=FDB021895,BMDB=BMDB00114,ECMDB=ECMDB00114	KNApSAcK=C00002195,ChEBI=CHEBI:8883,UNPD=UNPD36273	C5H14NO6P	C5H14NO6P	C12H9NO3	8.2654	7.2188	6.9577
Negative	226.978	2.1	68.94031:59 112.98627:7544	[M-H]-			0.04683	-0.70449	No annotation
Positive	231.134	11.55	116.06207:6527	[M+H]+			0.26664	0.54348	Other	Fatty alcohol esters	Germacrane sesquiterpenoids	Peptides	(2E,8Z)-Decadiene-4,6-diyn-1-yl 3-methylbutanoate	Furanodienone	Hydroxyprolyl-Valine	HMDB=HMDB0035425,FooDB=FDB014103,LipidMAPS=LMFA07010699,UNPD=UNPD45566;UNPD71448;UNPD223424	HMDB=HMDB0036768,KNApSAcK=C00012352;C00012353,ChEBI=CHEBI:80825,FooDB=FDB015709;FDB015710,UNPD=UNPD36161;UNPD40055;UNPD57206;UNPD75649;UNPD212084	HMDB=HMDB0028876	C15H18O2	C15H18O2	C10H18N2O4	8.3001	8.068	8.0083
Negative	237.091	0.69	207.08043:98	[M-H]-			0.34216	7.6848	Other	Nitrophenyl ethers	N-alkylpiperazines	Dipeptides	Falimint	15(R)-hydroperoxy-EPE	Glycyl-Tyrosine	HMDB=HMDB0040988,ChEBI=CHEBI:134968,FooDB=FDB020847,STOFF=STOFF_3444	HMDB=HMDB0062295,ChEBI=CHEBI:42334;CHEBI:46755;CHEBI:46757,STOFF=STOFF_9783,PubChem=23831	HMDB=HMDB0028853,ChEBI=CHEBI:73517,Saliva=HMDB0028853,Feces=HMDB0028853,UNPD=UNPD192248	C11H14N2O4	C8H18N2O4S	C11H14N2O4	8.5649	8.4469	8.4101
Positive	237.221	11.43	81.09978:242 83.11017:54 95.19579:210 97.1145:97 109.14647:200 111.10078:89 121.0228:253 123.18704:320 131.07642:85 135.10609:362 137.08466:219 149.14754:312 153.08984:79 163.05148:87 181.29787:58 205.01707:106 207.02942:959 219.16206:1322 220.9825:85 222.99359:469 224.11021:53	[M+H]+			0.22009	0.48754	Other	Naphthofurans	Fatty aldehydes	Bicyclic monoterpenoids	Ambronide	(10Z,12E)-hexadecadienal	3-(5,6,6-Trimethylbicyclo[2.2.1]hept-1-yl)cyclohexanol	HMDB=HMDB0036831,KNApSAcK=C00048319,ChEBI=CHEBI:78307,FooDB=FDB015782,STOFF=STOFF_4982,UNPD=UNPD120028;UNPD182498;UNPD77276	ChEBI=CHEBI:133914,LipidMAPS=LMFA06000094;LMFA06000200;LMFA06000218;LMFA06000222,UNPD=UNPD154261;UNPD182157;UNPD207538;UNPD227981	HMDB=HMDB0031851,FooDB=FDB008535,STOFF=STOFF_4981,UNPD=UNPD29688	C16H28O	C16H28O	C16H28O	7.7169	7.4993	7.4507
Positive	239.106	13.02	70.13559:105 82.98914:73 84.04562:1019 85.92542:70 87.10834:238 88.11871:2859 96.13988:102 97.10114:937 98.14047:199 99.05208:77 100.07475:122 112.09583:3158 113.18195:587 114.04895:100 119.80692:58 125.16336:77 128.03719:1376 129.1516:430 131.05193:58035 132.16362:136 138.32176:83 141.11807:729 143.20586:840 152.07838:1751 155.11723:303 157.22801:117 163.90736:159 166.22804:111 180.13593:128 220…	[M+H]+			0.17723	3.4433	Peptide	Dipeptides	Dipeptides	N-alkylpiperazines	Glycyl-Tyrosine	Tyrosyl-Glycine	15(R)-hydroperoxy-EPE	HMDB=HMDB0028853,ChEBI=CHEBI:73517,Saliva=HMDB0028853,Feces=HMDB0028853,UNPD=UNPD192248	HMDB=HMDB0029105,ChEBI=CHEBI:74990	HMDB=HMDB0062295,ChEBI=CHEBI:42334;CHEBI:46755;CHEBI:46757,STOFF=STOFF_9783,PubChem=23831	C11H14N2O4	C11H14N2O4	C8H18N2O4S	8.3385	8.3239	8.2646
Positive	244.064	13.63	80.79164:152 96.12857:452 102.06776:52 105.1069:135 107.19913:85 108.05655:195 112.01015:144 131.03082:424 132.05177:87 134.16873:287 136.0619:691 149.00557:835 150.02974:902 151.05833:144 152.02844:2050 153.05519:206 177.9592:435 180.0648:14330 181.03914:309 216.20013:120 226.06789:4832 227.18617:79	[M+H]+	yes	yes	0.022765	2.4661	Phospholipid	2-acyl-sn-glycero-3-phosphoethanolamines	Furanoquinolines		1-alkyl-2-acylglycerophosphoethanolamine	Maculine		HMDB=HMDB0062185	KNApSAcK=C00002183,ChEBI=CHEBI:6629,UNPD=UNPD2588		C6H14NO7P	C13H9NO4		7.2468	6.8162
Positive	252.106	14.56	198.1826:63 216.22649:375 234.09044:41209	[M+H]+		yes	0.022765	1.9229	Nucleoside	Purine 2'-deoxyribonucleosides	5'-deoxyribonucleosides	Sugar acids and derivatives	Deoxyadenosine	5'-Deoxyadenosine	Muramic acid	HMDB=HMDB0000101,KNApSAcK=C00019281,ChEBI=CHEBI:17256,SMPDB=PW_C000068,YMDB=YMDB00503,T3DB=T3D4958,FooDB=FDB021894,BMDB=BMDB00101,Urine=HMDB0000101,ECMDB=ECMDB00101,Serum=HMDB0000101,PubChem=13730;636,PlantCyc=DEOXYADENOSINE,UNPD=UNPD148912;UNPD177483	HMDB=HMDB0001983,ChEBI=CHEBI:17319,SMPDB=PW_C001329,YMDB=YMDB00150,FooDB=FDB022781,BMDB=BMDB01983,Urine=HMDB0001983,Serum=HMDB0001983,PubChem=439182,PlantCyc=CH33ADO	HMDB=HMDB0003254,ChEBI=CHEBI:7027;CHEBI:44312;CHEBI:47969,FooDB=FDB023131,BMDB=BMDB03254,UNPD=UNPD63102;UNPD69743;UNPD98180	C10H13N5O3	C10H13N5O3	C9H17NO7	8.5185	8.514	8.5119
Positive	252.108	13.74	162.14323:238 188.15193:122 216.13448:273 234.00856:26357 235.03612:89	[M+H]+		yes	0.035343	1.7658	Nucleoside	Purine 2'-deoxyribonucleosides	5'-deoxyribonucleosides	Sugar acids and derivatives	Deoxyadenosine	5'-Deoxyadenosine	Muramic acid	HMDB=HMDB0000101,KNApSAcK=C00019281,ChEBI=CHEBI:17256,SMPDB=PW_C000068,YMDB=YMDB00503,T3DB=T3D4958,FooDB=FDB021894,BMDB=BMDB00101,Urine=HMDB0000101,ECMDB=ECMDB00101,Serum=HMDB0000101,PubChem=13730;636,PlantCyc=DEOXYADENOSINE,UNPD=UNPD148912;UNPD177483	HMDB=HMDB0001983,ChEBI=CHEBI:17319,SMPDB=PW_C001329,YMDB=YMDB00150,FooDB=FDB022781,BMDB=BMDB01983,Urine=HMDB0001983,Serum=HMDB0001983,PubChem=439182,PlantCyc=CH33ADO	HMDB=HMDB0003254,ChEBI=CHEBI:7027;CHEBI:44312;CHEBI:47969,FooDB=FDB023131,BMDB=BMDB03254,UNPD=UNPD63102;UNPD69743;UNPD98180	C10H13N5O3	C10H13N5O3	C9H17NO7	8.4818	8.4772	8.4732
Positive	258.109	14.75	104.06624:63726 184.04533:261 199.14462:198 240.10716:481	[M+H]+			0.23173	0.52883	Peptide	Dipeptides	Pyrimidine nucleosides	Glycerophosphocholines	Pyro-L-glutaminyl-L-glutamine	5-Methylcytidine	Glycerophosphocholine	HMDB=HMDB0039229,ChEBI=CHEBI:88956;CHEBI:133739,FooDB=FDB018762,Saliva=HMDB0039229,UNPD=UNPD31323;UNPD61172	HMDB=HMDB0000982,ChEBI=CHEBI:20607,FooDB=FDB022351,BMDB=BMDB00982,Urine=HMDB0000982,Feces=HMDB0000982,Serum=HMDB0000982,UNPD=UNPD196780	HMDB=HMDB0000086,ChEBI=CHEBI:16870;CHEBI:135063,DrugBank=DB04660,SMPDB=PW_C000059,YMDB=YMDB00309;YMDB00694,FooDB=FDB021802;FDB030952,BMDB=BMDB00086,Saliva=HMDB0000086,Feces=HMDB0000086,ECMDB=ECMDB00086,CSF=HMDB0000086,Serum=HMDB0000086,PubChem=657272;439285;71920,PlantCyc=SN-3-GLYCEROPHOSPHOCHOLINE;L-1-GLYCERO-PHOSPHORYLCHOLINE,UNPD=UNPD6251	C10H15N3O5	C10H15N3O5	C8H20NO6P	8.4798	8.3935	8.2731
Positive	258.11	15.04	104.03261:31785 104.96779:78 181.14253:54 184.13394:66 198.98686:64 240.13219:168	[M+H]+			0.40148	0.67292	Peptide	Dipeptides	Pyrimidine nucleosides	Glycerophosphocholines	Pyro-L-glutaminyl-L-glutamine	5-Methylcytidine	Glycerophosphocholine	HMDB=HMDB0039229,ChEBI=CHEBI:88956;CHEBI:133739,FooDB=FDB018762,Saliva=HMDB0039229,UNPD=UNPD31323;UNPD61172	HMDB=HMDB0000982,ChEBI=CHEBI:20607,FooDB=FDB022351,BMDB=BMDB00982,Urine=HMDB0000982,Feces=HMDB0000982,Serum=HMDB0000982,UNPD=UNPD196780	HMDB=HMDB0000086,ChEBI=CHEBI:16870;CHEBI:135063,DrugBank=DB04660,SMPDB=PW_C000059,YMDB=YMDB00309;YMDB00694,FooDB=FDB021802;FDB030952,BMDB=BMDB00086,Saliva=HMDB0000086,Feces=HMDB0000086,ECMDB=ECMDB00086,CSF=HMDB0000086,Serum=HMDB0000086,PubChem=657272;439285;71920,PlantCyc=SN-3-GLYCEROPHOSPHOCHOLINE;L-1-GLYCERO-PHOSPHORYLCHOLINE,UNPD=UNPD6251	C10H15N3O5	C10H15N3O5	C8H20NO6P	8.4792	8.3846	8.3044
Positive	260.113	12.43	83.98555:57 97.98486:53 100.06292:425 114.97626:56 115.97728:1433 127.26718:142 128.10762:3415 150.1505:62 165.98509:90 178.22768:54 196.0175:60 198.21747:138 224.13142:80 232.06291:5043 242.1167:21167 242.78612:60	[M+H]+	yes	yes	0.022765	2.8569	Acyl carnitine	Acyl carnitines	Cyanogenic glycosides	Fatty acyl glycosides of mono- and disaccharides	Fumarycarnitine	Proacacipetalin	Osmaronin	HMDB=HMDB0013134,ChEBI=CHEBI:85093;CHEBI:87264,FooDB=FDB029307,LipidMAPS=LMFA07070064	KNApSAcK=C00001452,ChEBI=CHEBI:8423,UNPD=UNPD110607;UNPD81804	HMDB=HMDB0032769,FooDB=FDB010737,UNPD=UNPD108129;UNPD222119	C11H17NO6	C11H17NO6	C11H17NO6	8.7741	8.1149	8.076
Positive	263.237	11.6	109.09227:89 121.11778:105 123.05678:84 133.00174:54 135.12793:57 137.14819:71 147.29286:107 149.0789:105 151.14067:73 161.15404:52 163.08531:88 175.21364:91 189.25249:77 245.24445:1077	[M+H]+			0.076549	1.2896	Terpenoid	Sesquiterpenoids	Sesquiterpenoids	Sesquiterpenoids	5-(1-hydroxypropan-2-yl)isolongifol-4-ene	5-(1-hydroxypropan-2-yl)isolongifol-5-ene	5-(2-methoxyethyl)isolongifol-5-ene	ChEBI=CHEBI:48322,LipidMAPS=LMPR0103500004	ChEBI=CHEBI:48321,LipidMAPS=LMPR0103500003	ChEBI=CHEBI:48334,LipidMAPS=LMPR0103500015	C18H30O	C18H30O	C18H30O	7.3814	7.3455	7.2504
Negative	265.148	1.64	96.92531:1640 169.03764:131 170.9146:221 265.24249:54	[M-H]-			0.27302	-0.50463	Other	Terpene lactones	Fatty alcohols	Eudesmanolides, secoeudesmanolides, and derivatives	Blennin D	Ipomeamaronol	1alpha-Hydroxyarbusculin A	HMDB=HMDB0031902,KNApSAcK=C00021527,FooDB=FDB008589,LipidMAPS=LMPR0103620003,UNPD=UNPD104782	HMDB=HMDB0038148,KNApSAcK=C00011474,FooDB=FDB017376,LipidMAPS=LMFA05000668,UNPD=UNPD310;UNPD37667	HMDB=HMDB0037059,KNApSAcK=C00013003,ChEBI=CHEBI:66024,FooDB=FDB016042,UNPD=UNPD25792;UNPD66441	C15H22O4	C15H22O4	C15H22O4	8.1046	8.0859	8.0547
Positive	265.253	11.49	81.05351:163 93.12213:68 95.11293:176 97.05173:86 109.10869:163 121.18748:179 123.15405:82 135.19283:278 137.10075:57 149.16316:201 151.18164:102 153.01865:55 163.27229:143 177.14333:130 247.26662:1062	[M+H]+			0.36074	0.26531	Other	Long-chain fatty alcohols	Sesquiterpenoids	Fatty aldehydes	(9Z,12Z,15Z)-octadecatrien-1-ol	5-(1-hydroxypropan-2-yl)isolongifolane	11E,14E-Octadecadienal	ChEBI=CHEBI:77474,LipidMAPS=LMFA05000216	ChEBI=CHEBI:48328,LipidMAPS=LMPR0103500010	LipidMAPS=LMFA06000233	C18H32O	C18H32O	C18H32O	7.9904	7.8524	7.4397
Positive	268.104	3.56	136.08249:43125 250.16162:88	[M+H]+			0.15019	0.66031	Nucleoside	Purine nucleosides	Pyrimidine 2',3'-dideoxyribonucleosides	Purine 2'-deoxyribonucleosides	Adenosine	Zidovudine	Deoxyguanosine	HMDB=HMDB0000050;HMDB0014340,KNApSAcK=C00007444,ChEBI=CHEBI:16335;CHEBI:45327;CHEBI:46515;CHEBI:93913;CHEBI:95180,DrugBank=DB00194;DB00640;DB03528,SMPDB=PW_C000034,YMDB=YMDB00058,T3DB=T3D4275,FooDB=FDB003554,NANPDB=NANPDB_3517;NANPDB_4150,STOFF=STOFF_749;STOFF_3127,BMDB=BMDB00050,Urine=HMDB0000050;HMDB0014340,Saliva=HMDB0000050,Feces=HMDB0000050,ECMDB=ECMDB00050,CSF=HMDB0000050,Serum=HMDB0000050;…	HMDB=HMDB0014638,ChEBI=CHEBI:10110,DrugBank=DB00495,SMPDB=PW_C008998,T3DB=T3D4720,STOFF=STOFF_794,Urine=HMDB0014638,Serum=HMDB0014638,PubChem=35370	HMDB=HMDB0000085,ChEBI=CHEBI:17172,SMPDB=PW_C000058,YMDB=YMDB00505,FooDB=FDB012064,STOFF=STOFF_8670,BMDB=BMDB00085,Urine=HMDB0000085,Saliva=HMDB0000085,Feces=HMDB0000085,ECMDB=ECMDB00085,Serum=HMDB0000085,PubChem=187790;638,PlantCyc=DEOXYGUANOSINE,UNPD=UNPD30242;UNPD70487	C10H13N5O4	C10H13N5O4	C10H13N5O4	8.9837	8.7146	8.7071
Negative	279.233	4.94	261.25555:83	[M-H]-			0.18661	6.5225	Fatty acid	Lineolic acids and derivatives	Lineolic acids and derivatives	Lineolic acids and derivatives	Bovinic acid	6Z,9Z-octadecadienoic acid	Linoleic acid	HMDB=HMDB0003797;HMDB0005047;HMDB0005048,ChEBI=CHEBI:17539;CHEBI:32798;CHEBI:36025;CHEBI:38393;CHEBI:88464,FooDB=FDB021827;FDB023609;FDB023610,BMDB=BMDB03797;BMDB05047;BMDB05048,LipidMAPS=LMFA01030117;LMFA01030118;LMFA01030119;LMFA02000307,Serum=HMDB0003797;HMDB0005047,PubChem=5280644,UNPD=UNPD139398;UNPD198998;UNPD25072	HMDB=HMDB0062238,ChEBI=CHEBI:78705;CHEBI:82749,LipidMAPS=LMFA01030330;LMFA01030332,UNPD=UNPD52434;UNPD77175	HMDB=HMDB0000673;HMDB0006270,KNApSAcK=C00001224;C00036669,ChEBI=CHEBI:17351;CHEBI:30245;CHEBI:75108;CHEBI:86141;CHEBI:92157,SMPDB=PW_C000530,YMDB=YMDB00884,T3DB=T3D4928,FooDB=FDB006287;FDB006562;FDB012760;FDB023868;FDB030981,NANPDB=NANPDB_443;NANPDB_444;NANPDB_723;NANPDB_2337;NANPDB_3446;NANPDB_4237;NANPDB_4833;NANPDB_5444,STOFF=STOFF_158,BMDB=BMDB00673;BMDB06270,LipidMAPS=LMFA01030120;LMFA010301…	C18H32O2	C18H32O2	C18H32O2	9.2059	9.2024	9.2024
Positive	280.264	11.44	94.97754:82 109.19427:63 121.15401:60 123.24269:73 149.15623:78 151.28444:52 165.31693:128 175.2276:61 189.05725:126 245.21222:1184 263.20801:2306 265.24078:103	[M+H]+			0.1153	0.9544	Other	Fatty amides	N-acylpiperidines		Linoleamide	N-[(Z)-11-methyldodec-2-enoyl]piperidine		HMDB=HMDB0062656,ChEBI=CHEBI:82984;CHEBI:93121,LipidMAPS=LMFA08010008,UNPD=UNPD14642	ChEBI=CHEBI:87149		C18H33NO	C18H33NO		8.2487	6.5182
Positive	281.138	1.91	91.08124:69 107.18785:191 110.91261:53 119.0994:766 129.09798:190 135.02762:2416 146.95169:384 163.12604:77 165.21342:66 177.26926:61 221.15512:52 223.08212:76 245.27121:78 249.22586:81 262.55627:78 263.25247:186 265.11389:143 266.26208:71	[M+H]+			0.90941	0.034393	Organic acid	Abscisic acids and derivatives	Abscisic acids and derivatives	Germacranolides and derivatives	13-Hydroxyabscisic acid	Nigellic acid	Crispolide	HMDB=HMDB0036095,KNApSAcK=C00011541,ChEBI=CHEBI:20805;CHEBI:58490;CHEBI:85162,FooDB=FDB014935;FDB030631,LipidMAPS=LMPR0103050010,PubChem=91820132;25245404;11954194,PlantCyc=CPD-7234,UNPD=UNPD84358	HMDB=HMDB0036094,KNApSAcK=C00011540,ChEBI=CHEBI:20764,FooDB=FDB014934,LipidMAPS=LMPR0103050014,PubChem=91820092,UNPD=UNPD103504	HMDB=HMDB0036695,KNApSAcK=C00012420,ChEBI=CHEBI:73231,FooDB=FDB015629,PubChem=13993178,UNPD=UNPD156754;UNPD27459	C15H20O5	C15H20O5	C15H20O5	8.7619	8.7619	8.2474
Positive	284.331	2.73	85.15047:152 214.20935:56 284.43341:91	[M+H]+			0.087623	-0.64297	No annotation
Negative	285.031	2.89	191.0634:127 227.03842:474	[M-H]-		yes	0.041171	-1.1301	Flavonoid-like	Flavonols	Flavones	Flavones	Kaempferol	5,6,7-trihydroxy-2-(4-hydroxyphenyl)-4H-chromen-4-one	5,7,8-trihydroxy-2-(4-hydroxyphenyl)-4H-chromen-4-one	HMDB=HMDB0005801,KNApSAcK=C00004565,ChEBI=CHEBI:28499;CHEBI:58573,DrugBank=DB01852,YMDB=YMDB01722,T3DB=T3D4795,FooDB=FDB000633,NANPDB=NANPDB_320;NANPDB_715;NANPDB_1211;NANPDB_1291;NANPDB_1325;NANPDB_1471;NANPDB_2075;NANPDB_2305;NANPDB_2383;NANPDB_3192;NANPDB_3293;NANPDB_3339;NANPDB_3431;NANPDB_3473;NANPDB_3553;NANPDB_3909;NANPDB_4516;NANPDB_5116;NANPDB_5705;NANPDB_6304,STOFF=STOFF_8461,BMDB=BMDB0…	HMDB=HMDB0128587,KNApSAcK=C00003834,ChEBI=CHEBI:9062;CHEBI:78328,FooDB=FDB002464;FDB021711,LipidMAPS=LMPK12111160,PlantCyc=CPD-12726,UNPD=UNPD159784	HMDB=HMDB0130166,KNApSAcK=C00003848,ChEBI=CHEBI:6059,NANPDB=NANPDB_2675,LipidMAPS=LMPK12111361,UNPD=UNPD113598	C15H10O6	C15H10O6	C15H10O6	8.4136	8.3669	8.3669
Positive	292.202	1.93	102.12077:123 108.0757:209 109.03526:75 125.06432:1969 126.17912:5350 131.27243:85 133.96628:71 134.9852:124 191.08859:977 192.07889:58 208.22208:965 209.17844:29120 218.10168:14394 219.16461:851 259.04263:92 274.19025:6534 275.18976:664	[M+H]+			0.061409	-0.56987	Other	Naphthalenes	Naphthalenes	Anthracenes	Terbinafine	terbinafine hydrochloride	melitracen	HMDB=HMDB0014995,ChEBI=CHEBI:9448;CHEBI:77615;CHEBI:94705,DrugBank=DB00857,STOFF=STOFF_1383,Urine=HMDB0014995,Serum=HMDB0014995,PlantCyc=CPD-10571	ChEBI=CHEBI:77614	ChEBI=CHEBI:135214,STOFF=STOFF_3362	C21H25N	C21H25N	C21H25N	7.3589	6.9423	6.8731
Negative	298.943	1.58	204.93372:342 299.01123:97	[M-H]-			0.64583	0.4106	No annotation
Negative	300.904	2.31	113.02808:3093 205.3949:356 206.89941:141532 301.03058:309	[M-H]-			0.062774	-0.55424	No annotation
Negative	302.904	2.79	113.07466:201 207.00385:124 208.89706:3061	[M-H]-			0.10876	-1.2389	No annotation
Positive	310.109	13.81	160.0704:108 166.02065:236 195.993:116 201.32758:55 210.06488:80 225.20352:371 226.34464:192 238.09372:124 244.11127:1948 246.13235:119 255.4931:84 256.20035:251 273.08246:4099 274.06818:5867 275.10312:154 291.20355:21963 292.14679:73139	[M+H]+		yes	0.024625	1.7213	Sialic acid	N-acylneuraminic acids	Neuraminic acids	Pyrrolopyrimidine nucleosides and nucleotides	N-Acetylneuraminic acid	9-O-acetylneuraminic acid	sangivamycin	HMDB=HMDB0000230;HMDB0000773,ChEBI=CHEBI:17012;CHEBI:35418;CHEBI:49026;CHEBI:45744;CHEBI:58705;CHEBI:58770,DrugBank=DB01894;DB02344;DB03721;DB04265,SMPDB=PW_C000155,FooDB=FDB022234,BMDB=BMDB00230;BMDB00773,Urine=HMDB0000230,Saliva=HMDB0000230,Feces=HMDB0000230,ECMDB=ECMDB00830;ECMDB20347;ECMDB20348,CSF=HMDB0000230,Serum=HMDB0000230,PubChem=21983255;7173827;6857396;445063;439197,PlantCyc=CPD0-1123…	ChEBI=CHEBI:28879,PubChem=440038	ChEBI=CHEBI:85997,PubChem=14978,UNPD=UNPD112652;UNPD134006	C11H19NO9	C11H19NO9	C12H15N5O5	8.2416	7.851	7.6419
Negative	311.169	1.69	170.1055:75 183.0367:2117 183.9801:557 197.1122:220 198.10922:109 225.15091:70 247.35071:251 311.23804:478	[M-H]-			0.88695	0.049842	Other	Furanones	Estrogens and derivatives	Tetrahydroisoquinolines	Jatrophone	2-hydroxyethinylestradiol	Praziquantel	KNApSAcK=C00003446,ChEBI=CHEBI:6086,UNPD=UNPD180019;UNPD198959;UNPD226567	HMDB=HMDB0061027,Urine=HMDB0061027,Serum=HMDB0061027	HMDB=HMDB0015191,ChEBI=CHEBI:91583,DrugBank=DB01058,STOFF=STOFF_1272,Urine=HMDB0015191,Serum=HMDB0015191	C20H24O3	C20H24O3	C19H24N2O2	7.4136	7.1841	7.1648
Positive	311.258	10.86	93.07323:84 95.12381:146 97.21355:92 106.9678:105 109.1174:129 121.02687:202 123.12183:57 135.02263:257 136.95309:84 139.06241:53 149.21356:165 163.19168:93 219.31345:215 237.32983:314	[M+H]+			0.058011	0.73045	Fatty acid	Fatty alcohols	Sesquiterpenoids	Lineolic acids and derivatives	(R)-2-Hydroxysterculic acid	methoprene	9R-hydroxy-10E,12E-octadecadienoic acid, methyl ester	HMDB=HMDB0031060,FooDB=FDB003062,LipidMAPS=LMFA01140051,UNPD=UNPD128450	ChEBI=CHEBI:34839;CHEBI:39255;CHEBI:39256;CHEBI:39257,STOFF=STOFF_394;STOFF_2413	LipidMAPS=LMFA01050549,UNPD=UNPD139101;UNPD38661;UNPD226662	C19H34O3	C19H34O3	C19H34O3	7.8383	7.2419	7.2322
Positive	313.274	11.1	95.09758:165 109.08202:176 123.14854:76 137.06699:55 238.91156:81 257.26648:231 281.11896:76 299.25119:63	[M+H]+			0.13479	0.71511	Fatty acid	Long-chain fatty acids	Long-chain fatty acids	Acyclic diterpenoids	(2E,18R)-18-hydroxynonadec-2-enoic acid	(2E)-19-hydroxynonadec-2-enoic acid	3-oxopristanic acid	ChEBI=CHEBI:79006	ChEBI=CHEBI:79180	ChEBI=CHEBI:63891	C19H36O3	C19H36O3	C19H36O3	7.6283	7.418	7.3021
Positive	325.11	13.96	97.09918:332 109.0674:132 126.92606:515 144.92918:1039 162.94641:1873 223.03979:52 240.9949:91 253.01678:124 258.16818:55 259.06818:95 271.04752:745 288.74554:1476 306.13831:191 307.21823:78	[M+H]+			0.45937	0.1112	Benzenoid	2-arylbenzofuran flavonoids	2-arylbenzofuran flavonoids	Phenanthrenes and derivatives	Moracin L	Moracin K	2,3-Dehydro-UWM6	HMDB=HMDB0041297,KNApSAcK=C00036156,FooDB=FDB021214,UNPD=UNPD108149	HMDB=HMDB0041296,KNApSAcK=C00036155,FooDB=FDB021213,UNPD=UNPD111567	ChEBI=CHEBI:81886,PubChem=50986198;25195328,UNPD=UNPD103092;UNPD109668	C19H16O5	C19H16O5	C19H16O5	7.4255	7.3684	7.3681
Negative	325.185	1.68	169.99921:74 183.00656:2449 184.04668:587 197.13387:170 198.0818:146 212.15903:52 261.31195:147 325.30804:410	[M-H]-			0.5998	0.15388	Alkaloid	Ajmaline-sarpagine alkaloids	Benzenesulfonic acids and derivatives	Benzenesulfonic acids and derivatives	Ajmaline	4-Dodecylbenzenesulfonic Acid	2-Dodecylbenzenesulfonic acid	HMDB=HMDB0015495,KNApSAcK=C00001679;C00024283;C00024294;C00024344;C00024345,ChEBI=CHEBI:28462;CHEBI:5979;CHEBI:58567;CHEBI:95132;CHEBI:110180;CHEBI:110205,DrugBank=DB01426,FooDB=FDB030658,STOFF=STOFF_3130,Urine=HMDB0015495,Serum=HMDB0015495,PubChem=44891335;198674,PlantCyc=CPD-4242;CPD-14751,UNPD=UNPD120273;UNPD25291;UNPD39060;UNPD41373;UNPD44856;UNPD4567;UNPD50361;UNPD99706	HMDB=HMDB0059915,STOFF=STOFF_3994	HMDB=HMDB0031031,FooDB=FDB003025,STOFF=STOFF_92	C20H26N2O2	C18H30O3S	C18H30O3S	7.2856	7.1471	7.1471
Positive	326.306	12	308.18777:261 309.39139:951	[M+H]+			0.058011	2.4529	Other	N-acylethanolamines			N-Oleoylethanolamine			HMDB=HMDB0002088,ChEBI=CHEBI:71466,FooDB=FDB022839,BMDB=BMDB02088,LipidMAPS=LMFA08040015;LMFA08040048,Feces=HMDB0002088,Serum=HMDB0002088,PubChem=5283454			C20H39NO2			8.8399
Positive	327.253	9.55	109.08553:164 127.0479:853 309.15741:53	[M+H]+			0.4326	-1.4328	Other	Long-chain fatty alcohols	Long-chain fatty alcohols	Long-chain fatty alcohols	1-Acetoxy-2-hydroxy-16-heptadecen-4-one	Avocadyne 4-acetate	Avocadyne 1-acetate	HMDB=HMDB0031006,FooDB=FDB002995,LipidMAPS=LMFA05000594,UNPD=UNPD7923	HMDB=HMDB0031049,FooDB=FDB003044,LipidMAPS=LMFA05000645,UNPD=UNPD109554;UNPD2855;UNPD78873	HMDB=HMDB0031048,FooDB=FDB003043,LipidMAPS=LMFA05000644,UNPD=UNPD170370;UNPD21247	C19H34O4	C19H34O4	C19H34O4	8.2028	8.2026	8.2026
Positive	328.102	13.65	166.19485:72 244.07993:1932 274.05762:852 292.01422:6992 310.02295:23055	[M+H]+		yes	0.022765	2.4737	Glycosyl	O-glycosyl compounds	Phenolic glycosides	Acylaminobenzoic acid and derivatives	Blepharin	Acetaminophen glucuronide	leteprinim	HMDB=HMDB0029344,KNApSAcK=C00036821,FooDB=FDB000405,UNPD=UNPD104106;UNPD140941;UNPD143222;UNPD158832	HMDB=HMDB0010316,ChEBI=CHEBI:32636;CHEBI:132962,SMPDB=PW_C006326,FooDB=FDB027468,STOFF=STOFF_3697,BMDB=BMDB10316,Urine=HMDB0010316,Feces=HMDB0010316,Serum=HMDB0010316,PubChem=83944,UNPD=UNPD121180	ChEBI=CHEBI:135395	C14H17NO8	C14H17NO8	C15H13N5O4	7.9178	7.9006	7.1836
Negative	330.078	9.17	113.08253:823	[M-H]-			0.16302	2.9432	Other	Thiazolidinediones			4-[5-(2-methyl-3-phenylprop-2-enylidene)-2,4-dioxo-3-thiazolidinyl]butanoic acid			ChEBI=CHEBI:109828			C17H17NO4S			6.5594
Positive	336.087	14.73	103.9791:8318 123.04527:63 182.0654:12171 184.8649:355 203.00052:862 240.14227:631 241.0983:67 259.17822:358 261.11658:156 262.04831:1339 276.84351:271 300.09006:1679 318.19763:8001	[M+H]+			0.21697	1.0203	Peptide	Oligopeptides	Phenanthridines and derivatives	Morpholine carboxylic acids and derivatives	S-Formylglutathione	Luguine;(+)-Luguine;(R)-(+)-Luguine	[4-amino-3-(4-methylphenyl)-2-sulfanylidene-5-thiazolyl]-(4-morpholinyl)methanone	HMDB=HMDB0001550;HMDB0062625,ChEBI=CHEBI:16225;CHEBI:57688,YMDB=YMDB00320,FooDB=FDB022685,BMDB=BMDB01550,ECMDB=ECMDB01550,PubChem=25246250;189122,PlantCyc=CPD-548	KNApSAcK=C00001882,ChEBI=CHEBI:29,UNPD=UNPD184724;UNPD75439	ChEBI=CHEBI:117165	C11H17N3O7S	C19H13NO5	C15H17N3O2S2	8.0724	7.4608	7.0902
Positive	337.172	18.87	112.13617:1630 114.12769:758 115.93096:76 128.16786:72 130.0107:109 131.32959:107 138.01285:91 150.11206:230 156.09085:171 157.05522:138 158.11398:561 165.31964:72 173.22861:2367 175.06259:3529 180.17497:391 182.21826:62 187.18808:71 191.97485:89 197.03165:50 198.16238:293 203.13419:134 209.11307:1015 217.00577:2715 221.10925:97 222.17615:89 223.00027:65 224.22916:83 232.3143:107 239.16122:653 24…	[M+H]+			0.052032	3.699	Amino acid	Arginine and derivatives	Sesquiterpene lactones	Quinazolines	N2-Fructopyranosylarginine	(1S,2R,5R,6S,7R,8S,10R)-6-acetoxy-2-methoxy-4-oxopseudoguai-11(13)-en-12,8-olide	2-(1,3-benzoxazol-2-ylamino)-5-spiro[1,6,7,8-tetrahydroquinazoline-4,1'-cyclopentane]one	HMDB=HMDB0041541,FooDB=FDB021521,UNPD=UNPD220866	ChEBI=CHEBI:69330;CHEBI:69331,UNPD=UNPD203440;UNPD203441	ChEBI=CHEBI:93488	C12H24N4O7	C18H24O6	C19H20N4O2	7.8469	7.1606	7.0961
Positive	338.342	1.88	97.01689:94 107.09027:84 109.16568:216 111.10725:292 114.13577:271 121.10451:235 123.23621:210 124.98716:192 128.17377:118 135.00693:393 137.149:226 139.06035:109 142.15051:227 149.0934:435 151.16205:138 153.19058:120 156.15045:146 163.20654:493 165.27887:117 167.20041:147 170.155:233 177.17198:482 179.15828:148 181.3237:101 184.16751:139 191.26216:322 193.13298:135 195.23056:96 198.27887:331 205…	[M+H]+			0.23841	3.3015	Other	Fatty amides			6-cis-Docosenamide			ChEBI=CHEBI:69545,UNPD=UNPD204378			C22H43NO			6.4719
Negative	339.2	1.65	170.1525:114 183.0056:2527 184.17986:358 197.03642:199 198.18562:54 225.14966:71 275.36273:71 297.40231:70 339.24139:361	[M-H]-			0.25254	0.22718	Peptide	Dipeptides	Steroid lactones	Bicyclic monoterpenoids	Perindoprilat	Canrenone	Piperochromenoic acid	HMDB=HMDB0060574,ChEBI=CHEBI:132041,SMPDB=PW_C040677,STOFF=STOFF_8827,Urine=HMDB0060574,Serum=HMDB0060574	HMDB=HMDB0003033,ChEBI=CHEBI:135445,FooDB=FDB023096,STOFF=STOFF_7502,BMDB=BMDB03033,Serum=HMDB0003033	HMDB=HMDB0040635,FooDB=FDB020426,UNPD=UNPD35266	C17H28N2O5	C22H28O3	C22H28O3	8.2152	8.1397	7.9994
Positive	343.124	12.58	326.05469:61	[M+H]+			0.6062	-0.21361	Glycosyl	O-glycosyl compounds	O-glycosyl compounds	O-glycosyl compounds	Melibiose	Cellobiose	Trehalose	HMDB=HMDB0000048;HMDB0002923;HMDB0006792;HMDB0038489;HMDB0133305,KNApSAcK=C00001142,ChEBI=CHEBI:28053;CHEBI:28066;CHEBI:28189;CHEBI:43620;CHEBI:4808;CHEBI:36229;CHEBI:36230;CHEBI:36231;CHEBI:53445;CHEBI:59578;CHEBI:61625;CHEBI:61770;CHEBI:61827;CHEBI:62103;CHEBI:62357;CHEBI:71422;CHEBI:71552;CHEBI:139100,DrugBank=DB04116,SMPDB=PW_C000033;PW_C002930,YMDB=YMDB00895;YMDB02304,FooDB=FDB018317,BMDB=BM…	HMDB=HMDB0000055;HMDB0000163;HMDB0000186;HMDB0029902;HMDB0029933;HMDB0033368;HMDB0041627,KNApSAcK=C00001134;C00001136;C00001140;C00050427,ChEBI=CHEBI:17057;CHEBI:17306;CHEBI:17716;CHEBI:18147;CHEBI:18167;CHEBI:28085;CHEBI:28676;CHEBI:36217;CHEBI:36218;CHEBI:36219;CHEBI:41034;CHEBI:4174;CHEBI:25164;CHEBI:36224;CHEBI:36226;CHEBI:36227;CHEBI:47931;CHEBI:47933;CHEBI:47934;CHEBI:47935;CHEBI:47936;CHEB…	HMDB=HMDB0000975;HMDB0029880,KNApSAcK=C00001152,ChEBI=CHEBI:16551;CHEBI:27082;CHEBI:39244;CHEBI:39245,SMPDB=PW_C000776,YMDB=YMDB00008,FooDB=FDB001114;FDB001115;FDB031220,BMDB=BMDB00975,Urine=HMDB0000975,Feces=HMDB0000975,ECMDB=ECMDB00975;ECMDB04159,PubChem=7427;1143,PlantCyc=TREHALOSE,UNPD=UNPD109974;UNPD12870;UNPD2095;UNPD46267;UNPD55450	C12H22O11	C12H22O11	C12H22O11	8.6991	8.6991	8.6991
Positive	348.067	13.71	119.02108:923 135.9758:18072 137.06903:118	[M+H]+			0.44522	-0.28455	Nucleoside	Purine ribonucleoside monophosphates	Ribonucleoside 3'-phosphates	Pentose phosphates	Adenosine monophosphate	3'-AMP	Adenosine 2'-phosphate	HMDB=HMDB0000045,KNApSAcK=C00019347,ChEBI=CHEBI:16027;CHEBI:40721;CHEBI:95121;CHEBI:456215,DrugBank=DB00131,SMPDB=PW_C000032,YMDB=YMDB00097,FooDB=FDB021806;FDB030677,BMDB=BMDB00045,Urine=HMDB0000045,Saliva=HMDB0000045,Feces=HMDB0000045,ECMDB=ECMDB00045,CSF=HMDB0000045,Serum=HMDB0000045,PubChem=15938965;6083,PlantCyc=AMP,UNPD=UNPD130030;UNPD151359;UNPD182285	HMDB=HMDB0003540,KNApSAcK=C00019350,ChEBI=CHEBI:28931;CHEBI:60880,SMPDB=PW_C001918,FooDB=FDB023193,BMDB=BMDB03540,Saliva=HMDB0003540,ECMDB=ECMDB03540,PubChem=41211,PlantCyc=CPD-3706,UNPD=UNPD178646	HMDB=HMDB0011617,KNApSAcK=C00050412,ChEBI=CHEBI:28223;CHEBI:77740,YMDB=YMDB00564,FooDB=FDB028322,BMDB=BMDB11617,PlantCyc=CPD-3705,UNPD=UNPD56372;UNPD78433	C10H14N5O7P	C10H14N5O7P	C10H14N5O7P	8.27	8.2676	8.2676
Positive	355.285	10.39	127.1089:220 155.07639:232 267.02277:493 285.00574:267 291.05457:686	[M+H]+			0.26412	-2.6165	Fatty acid	Lineolic acids and derivatives	Lineolic acids and derivatives	Fatty alcohols	MG(18:2(9Z,12Z)/0:0/0:0)	MG(0:0/18:2(9Z,12Z)/0:0)	PGF2alpha methyl ether	HMDB=HMDB0011568,KNApSAcK=C00040789,ChEBI=CHEBI:75561;CHEBI:75563;CHEBI:75565;CHEBI:75568,FooDB=FDB028281,BMDB=BMDB11568,LipidMAPS=LMGL01010006,Feces=HMDB0011568,Serum=HMDB0011568,UNPD=UNPD106192;UNPD193801;UNPD29468;UNPD222178	HMDB=HMDB0011538,ChEBI=CHEBI:75457,FooDB=FDB028252,BMDB=BMDB11538,Feces=HMDB0011538,Serum=HMDB0011538,UNPD=UNPD152420	LipidMAPS=LMFA03010073	C21H38O4	C21H38O4	C21H38O4	8.0568	7.706	7.3902
Positive	365.106	13.17	185.0188:4795 185.76447:55 203.01114:8968 275.22882:63 305.24551:531 347.1315:379	[M+H]+			0.051766	-2.0238	Flavonoid-like	6-prenylated isoflavanones	Pyranoisoflavonoids	Arylnaphthalene lignans	Robustone	5-Hydroxy-3',4'-methylenedioxy-6'',6''-dimethylpyrano[2'',3'':7,8]isoflavone	Justicidin B	KNApSAcK=C00009503,LipidMAPS=LMPK12050245,UNPD=UNPD141441	KNApSAcK=C00009907,LipidMAPS=LMPK12050249,UNPD=UNPD44996	KNApSAcK=C00000701,ChEBI=CHEBI:6094,NANPDB=NANPDB_3614,PubChem=442882,PlantCyc=CPD-13455,UNPD=UNPD138757	C21H16O6	C21H16O6	C21H16O6	7.976	7.976	7.8996
Positive	369.352	11.22	105.01933:59 107.14661:90 109.09982:156 117.25748:51 119.04082:211 121.19809:271 123.19525:189 133.14877:215 135.21812:782 137.22751:79 145.24164:83 147.0907:829 149.20642:650 151.20045:100 159.18027:147 161.03891:919 163.16776:286 165.16907:93 173.17743:162 175.05298:787 177.23775:158 179.2411:136 187.2767:269 189.07584:746 191.17432:101 193.25925:144 201.31256:310 203.24271:542 205.20103:137 20…	[M+H]+	yes	yes	0.022765	1.1495	Steroid	Vitamin D and derivatives			3-Deoxyvitamin D3			LipidMAPS=LMST03020618			C27H44			7.4506
Positive	373.368	10.02	355.02954:173	[M+H]+		yes	0.04683	2.4234	Other	Azasteroids and derivatives			Kurchessine			KNApSAcK=C00002254,ChEBI=CHEBI:6145,UNPD=UNPD113059;UNPD151183;UNPD180430;UNPD27806;UNPD32769			C25H44N2			4.7987
Negative	374.245	1.15	124.19361:104 149.04155:57 205.15924:62 206.17308:122 216.33937:71 232.21375:2295 233.14258:127 247.37057:84 249.46335:68 260.09021:210 272.25812:1794 273.23126:342 274.25735:228 289.13351:1658 290.28116:7042 291.29559:774 316.23645:1938 317.15271:154 318.27838:726 356.30698:145 358.25504:611 374.35999:1487	[M-H]-			0.10749	-0.51266	No annotation
Positive	376.259	1.87	108.7718:371 118.07925:734 124.29921:1087 125.1216:3185 126.05781:14883 127.19202:5105 135.08266:531 136.16237:943 160.85005:530 174.11914:450 190.65744:1005 191.27585:490 192.07512:7792 200.35312:570 201.1207:642 209.14529:234336 210.21547:30505 218.23413:30770 219.21475:41290 228.20377:2472 256.98834:2934 258.12701:561 273.17621:411 274.03958:4199 275.32843:102317 276.05231:2018 284.20993:1128 …	[M+H]+			0.022765	-0.35331	No annotation
Positive	376.26	1.15	108.92931:67 124.54822:145 125.19128:515 126.04845:2365 127.08493:847 135.0533:65 163.84747:144 174.05826:166 176.88821:140 190.07153:83 191.09825:566 192.21292:765 201.14767:76 209.12801:43725 210.09119:9136 218.07404:2053 219.18237:9137 228.18967:904 256.01208:67 257.05887:939 259.28485:400 260.06189:305 272.68951:345 274.22885:1317 275.25983:17405 276.32611:107 284.14154:557 290.69254:70 292.2…	[M+H]+			0.066512	-0.52087	No annotation
Positive	378.116	14.67	188.14676:93 206.00865:390 216.06448:151 224.20914:295 276.09189:213 294.1217:8456 324.10336:962 342.01407:6179 342.63916:56 360.01068:13806 360.65189:60	[M+H]+			0.058011	1.1877	Other	Glycosylamines	Phenyltetrazoles and derivatives	Nitrothiazoles	N(4)-acetylcytidine 5'-monophosphate residue	N2-phenyl-6-[[(1-phenyl-5-tetrazolyl)thio]methyl]-1,3,5-triazine-2,4-diamine	Disperse Blue 124	ChEBI=CHEBI:75085	ChEBI=CHEBI:93220	ChEBI=CHEBI:59605	C13H20N3O8P	C17H15N9S	C16H19N5O4S	7.193	6.892	6.7837
Positive	381.079	0.76	201.11089:89	[M+H]+			0.32098	2.4174	Glycosyl	O-glycosyl compounds	Phenylpyridines		4-Methoxybenzyl O-(2-sulfoglucoside)	2-methylsulfonyl-4,6-diphenyl-3-thieno[2,3-b]pyridinamine		HMDB=HMDB0034754,FooDB=FDB013300,UNPD=UNPD81525	ChEBI=CHEBI:105620		C14H20O10S	C20H16N2O2S2		7.4872	5.9007
Negative	384.935	2.82	249.00119:2655	[M-H]-			0.051766	-1.8632	No annotation
Positive	385.346	10.82	147.12531:65 161.05057:55 173.31891:59 187.21848:60 201.20749:64 205.05487:85 213.12938:57 217.16469:66 219.08815:73 227.23856:74 231.30652:88 241.20892:101 245.26907:64 255.20505:94 259.35522:71 273.26114:117 315.44067:53 367.32263:1720	[M+H]+	yes	yes	0.022765	2.83	Steroid	Cholesterols and derivatives	Vitamin D and derivatives	Cholesterols and derivatives	7-Dehydrocholesterol	Vitamin D3	8-Dehydrocholesterol	HMDB=HMDB0000032;HMDB0006505,KNApSAcK=C00023747,ChEBI=CHEBI:17759,SMPDB=PW_C000022,FooDB=FDB021882;FDB023946,STOFF=STOFF_9577,BMDB=BMDB00032;BMDB06505,LipidMAPS=LMST01010069;LMST01010247;LMST01010364,Urine=HMDB0000032,CSF=HMDB0000032,Serum=HMDB0000032,PubChem=25201813;439423;172,PlantCyc=CPD-4187,UNPD=UNPD12930;UNPD187473;UNPD53723;UNPD6736	HMDB=HMDB0000876;HMDB0006719;HMDB0014315,KNApSAcK=C00041217,ChEBI=CHEBI:28940,DrugBank=DB00169,SMPDB=PW_C000699,T3DB=T3D2703,FooDB=FDB012732;FDB021586;FDB024037,STOFF=STOFF_418,BMDB=BMDB00876;BMDB06719,LipidMAPS=LMST03020001;LMST03020219;LMST03020220;LMST03020221;LMST03020648,Urine=HMDB0014315,Saliva=HMDB0000876,Serum=HMDB0000876;HMDB0014315,PubChem=25245915;10883523;5283711;5280795;2735,UNPD=UNP…	HMDB=HMDB0002027,ChEBI=CHEBI:89982,SMPDB=PW_C001360,FooDB=FDB022805,BMDB=BMDB02027,LipidMAPS=LMST01010242,CSF=HMDB0002027,Serum=HMDB0002027	C27H44O	C27H44O	C27H44O	8.8873	8.8728	8.872
Negative	394.89	2.31	112.9563:111 205.92325:149 206.98224:7222 298.93091:70 300.87222:630953 301.99503:1164 395.18295:262	[M-H]-			0.041171	-0.74506	No annotation
Negative	394.89	0.59	206.3204:61 207.02423:531 300.89548:44358 302.06317:318	[M-H]-			0.051766	-1.4671	No annotation
Negative	398.886	2.14	210.9407:76 285.22314:56 303.0423:73 304.85449:5490 382.14444:78	[M-H]-			0.23673	-0.63709	No annotation
Negative	401.13	0.7	341.1756:1640	[M-H]-			0.091753	0.66706	Flavonoid-like	8-O-methylated flavonoids	7-O-methylated flavonoids	8-O-methylated flavonoids	Nobiletin	Hexamethylquercetagetin	3,3',4',5,7,8-Hexamethoxyflavone	HMDB=HMDB0029540,KNApSAcK=C00001076,ChEBI=CHEBI:7602,FooDB=FDB000683,NANPDB=NANPDB_62,LipidMAPS=LMPK12111468,UNPD=UNPD118756	HMDB=HMDB0029308,KNApSAcK=C00004713,ChEBI=CHEBI:93682,FooDB=FDB000219;FDB000364,NANPDB=NANPDB_5846;NANPDB_6142,LipidMAPS=LMPK12113018,UNPD=UNPD112590	HMDB=HMDB0037755,KNApSAcK=C00004745,FooDB=FDB016894,LipidMAPS=LMPK12113255,UNPD=UNPD87984	C21H22O8	C21H22O8	C21H22O8	8.6759	8.6673	8.2507
Positive	411.056	0.93	305.20016:91 323.03857:247 347.05951:25849 351.06738:326 386.92847:55 387.83371:236	[M+H]+			0.4326	-1.8405	Other	Coumarins and derivatives	2-naphthalene sulfonates		Alexa Fluor 350	2-naphthalenesulfonic acid [2-[(2-amino-4-oxo-5-thiazolylidene)methyl]phenyl] ester		ChEBI=CHEBI:51744	ChEBI=CHEBI:120577		C16H14N2O9S	C20H14N2O4S2		6.7541	6.4466
Positive	411.399	13.05	121.22095:115 123.04191:70 135.05571:135 137.02475:52 147.22583:56 149.15834:86 151.11021:52 163.16185:104 175.07121:69 177.17276:111 189.25421:132 191.2106:154 203.1702:161 217.21582:251 219.23058:52 231.14734:390 233.37152:71 245.3526:66 247.28629:51 259.22287:324 273.17291:163 275.2955:64 285.27838:146 287.29358:213 299.29077:106 301.2619:150 313.15164:54 315.29523:50 327.33209:129 329.19962:2…	[M+H]+			0.066512	-0.88738	Terpenoid	Triterpenoids	Hopanoids	Sesquiterpenoids	Squalene	C00050938	C30:5 Monocyclic highly branched isoprenoid A	HMDB=HMDB0000256,KNApSAcK=C00003755,ChEBI=CHEBI:15440,SMPDB=PW_C000175,YMDB=YMDB00769,FooDB=FDB015780;FDB015781,NANPDB=NANPDB_693;NANPDB_742;NANPDB_6810,STOFF=STOFF_7277,BMDB=BMDB00256,LipidMAPS=LMPR0106010002,Feces=HMDB0000256,Serum=HMDB0000256,PubChem=25244109;11975273;5280370;638072,PlantCyc=SQUALENE,UNPD=UNPD108946;UNPD156518;UNPD18088;UNPD199029;UNPD209831;UNPD224521;UNPD228673	KNApSAcK=C00050938,ChEBI=CHEBI:4648,LipidMAPS=LMPR04000001,PubChem=92155,PlantCyc=HOP-2229-ENE,UNPD=UNPD101467;UNPD103488;UNPD110921;UNPD118216;UNPD20039;UNPD5672;UNPD69594;UNPD84576;UNPD8842	LipidMAPS=LMPR0106020001,UNPD=UNPD119527	C30H50	C30H50	C30H50	8.0925	7.5799	7.2513
Positive	415.212	1.92	117.04289:169 119.02913:18210 127.10123:1537 133.07849:3182 145.10419:540 151.09219:538 171.36136:102 186.83536:99 191.30225:52 193.32712:68 199.2057:105 211.07639:62 215.23109:63 216.95268:204 225.21315:81 227.15414:64 228.65723:228 235.04572:61 247.17255:823 249.22794:56 251.1022:350 257.15063:91 259.09183:632 277.14835:2299 279.20605:1400 294.97235:6201 304.15973:81 327.22351:105 344.6322:146 …	[M+H]+			0.6062	0.14417	Other	Spironolactones and derivatives	Melleolides and analogues	Melleolides and analogues	Eplerenone	Armillarin	Armillaripin	HMDB=HMDB0014838,ChEBI=CHEBI:31547;CHEBI:91683,DrugBank=DB00700,SMPDB=PW_C009176,STOFF=STOFF_5114,Urine=HMDB0014838,Serum=HMDB0014838	HMDB=HMDB0039380,FooDB=FDB018945,UNPD=UNPD25702	HMDB=HMDB0030404,FooDB=FDB002265,UNPD=UNPD45602	C24H30O6	C24H30O6	C24H30O6	7.8645	7.6756	7.649
Positive	419.353	12.57	148.95386:158 167.02542:138	[M+H]+			0.068489	-0.88794	Steroid	Dihydroxy bile acids, alcohols and derivatives	Cholesterols and derivatives	Cholesterols and derivatives	3a,7a-Dihydroxy-5b-cholestan-26-al	7a,12a-Dihydroxy-5a-cholestan-3-one	7-a,25-Dihydroxycholesterol	HMDB=HMDB0006894,ChEBI=CHEBI:27428,SMPDB=PW_C002996,FooDB=FDB024141,BMDB=BMDB06894,LipidMAPS=LMST04030162,PubChem=46926303;5460041	HMDB=HMDB0006886;HMDB0006887,ChEBI=CHEBI:2287;CHEBI:2288,SMPDB=PW_C002989,FooDB=FDB024133;FDB024134,BMDB=BMDB06886;BMDB06887,LipidMAPS=LMST04030113;LMST04030135,PubChem=5284271	HMDB=HMDB0006280,ChEBI=CHEBI:37623,SMPDB=PW_C002702,FooDB=FDB023874,BMDB=BMDB06280,LipidMAPS=LMST04030166,PubChem=11954197	C27H46O3	C27H46O3	C27H46O3	8.0067	8.0002	7.9978
Positive	421.317	1.87	125.0811:56 126.29137:120 127.16526:99 191.24835:77 192.05304:92 209.16316:4691 210.09338:764 218.34853:324 219.12872:726 228.01535:76 257.33545:130 260.3125:56 274.15027:124 275.19131:1874 284.16504:78 292.16733:2590 293.3194:12401 302.1355:19217 309.65082:55 343.2514:138 358.26056:3263 393.34271:73 394.39215:70 402.68668:74 403.29196:516 405.30255:60	[M+H]+			0.022765	-0.56794	No annotation
Positive	423.183	12.45	123.03389:63 168.04947:142 212.06339:43147 301.11896:81 365.17935:93	[M+H]+			0.25254	-2.4619	Flavonoid-like	3'-prenylated isoflavanones	6-prenylated isoflavanones	3'-prenylated flavones	Cajanone	Isoangustone A	Yinyanghuo B;(-)-5,7-Dihydroxy-2-[4-hydroxy-3-(2-hydroxy-3-methyl-3-butenyl)-5-(3-methyl-2-butenyl)phenyl]-4H-1-benzopyran-4-one	HMDB=HMDB0033804,KNApSAcK=C00009560,FooDB=FDB011967,LipidMAPS=LMPK12050495,UNPD=UNPD7849	HMDB=HMDB0038905,KNApSAcK=C00009922,FooDB=FDB018369,LipidMAPS=LMPK12050243,UNPD=UNPD95938	KNApSAcK=C00013409,ChEBI=CHEBI:66493,LipidMAPS=LMPK12110417,UNPD=UNPD137855	C25H26O6	C25H26O6	C25H26O6	8.041	8.0398	8.037
Positive	430.913	16.39	158.9664:3590 294.86487:537 316.95267:68	[M+H]+		YES	0.037901	-1.2551	No annotation
Positive	432.171	0.71	235.07831:449 270.00812:72 324.56299:52 396.82492:79	[M+H]+			0.07415	3.2193	Other	Alkyl-phenylketones	Phenyltetrazoles and derivatives	Dibenzofurans	Pseurotin A;(-)-Pseurotin A	2,5-diethoxy-N-[2-(2-methylphenyl)ethyl]-4-(1-tetrazolyl)benzenesulfonamide	4-tert-butylbenzoic acid [2-[(2-methoxy-3-dibenzofuranyl)amino]-2-oxoethyl] ester	KNApSAcK=C00045032;C00047550,ChEBI=CHEBI:64535,UNPD=UNPD133892;UNPD147387;UNPD172514;UNPD200915	ChEBI=CHEBI:105917	ChEBI=CHEBI:114246	C22H25NO8	C20H25N5O4S	C26H25NO5	6.0582	5.9047	5.8363
Positive	432.238	1.91	292.3385:167 414.47:319 415.21381:2128	[M+H]+			0.46556	0.22088	Amino acid	Beta amino acids and derivatives	Phenylazetidines	Oligopeptides	LSM-11961	(6R,7R,8R)-7-[4-(1-cyclohexenyl)phenyl]-8-(hydroxymethyl)-4-[1-oxo-2-(3-pyridinyl)ethyl]-1,4-diazabicyclo[4.2.0]octan-2-one	Ala-Leu-Thr-Gln	ChEBI=CHEBI:100587	ChEBI=CHEBI:126356;CHEBI:128254;CHEBI:129099;CHEBI:129945;CHEBI:130315;CHEBI:130907	ChEBI=CHEBI:73372	C26H29N3O3	C26H29N3O3	C18H33N5O7	5.8702	5.8665	5.6811
Positive	434.312	1.87	372.6116:94 376.36218:209 398.1218:251 416.2709:605 417.40799:103 418.99149:82	[M+H]+			0.058011	-0.31357	No annotation
Positive	447.404	1.93	130.99783:260 133.0979:132 149.01709:1322 167.09497:964 182.85266:59 197.11783:51 280.99695:97 319.33826:56 336.5036:117 337.15271:234 354.50177:164 355.30447:466 373.17746:209 410.85162:85 415.24496:68 429.22964:1114	[M+H]+		yes	0.035518	1.002	Other	Piperidines			xestospongin C			ChEBI=CHEBI:131784,UNPD=UNPD102158;UNPD109963;UNPD114373;UNPD23987;UNPD82229;UNPD96474			C28H50N2O2			6.2357
Negative	450.262	2.05	196.01337:160 214.11215:164 253.21191:9675 376.14517:52 389.05161:57	[M-H]-			0.1507	1.3296	Phospholipid	2-acyl-sn-glycero-3-phosphoethanolamines	1-acyl-sn-glycero-3-phosphoethanolamines	1-alkyl,2-acetylglycero-3-phosphocholines	LysoPE(0:0/16:1(9Z))	LysoPE(16:1(9Z)/0:0)	PC(O-11:1(10E)/2:0)	HMDB=HMDB0011474,FooDB=FDB028190,BMDB=BMDB11474,LipidMAPS=LMGP02050037	HMDB=HMDB0011504,YMDB=YMDB01201,FooDB=FDB028220,BMDB=BMDB11504,LipidMAPS=LMGP02050010	LipidMAPS=LMGP01020146	C21H42NO7P	C21H42NO7P	C21H42NO7P	8.5499	8.5464	8.1082
Positive	462.298	11.45	154.95543:80 265.33743:359 308.34271:75 444.40964:63	[M+H]+		yes	0.042691	2.5934	Other	Phenylmethylamines	Dipeptides		2-[(3R,6aS,8R,10aS)-3-hydroxy-1-[(4-methoxyphenyl)methyl]-3,4,6,6a,8,9,10,10a-octahydro-2H-pyrano[2,3-c][1,5]oxazocin-8-yl]-N-(2-pyrrolidin-1-ylethyl)acetamide	N-[(2S)-4-methyl-1-[[(2S)-4-methyl-1-oxo-1-[[(2S)-1-oxopentan-2-yl]amino]pentan-2-yl]amino]-1-oxopentan-2-yl]carbamic acid (phenylmethyl) ester		ChEBI=CHEBI:98171;CHEBI:98549;CHEBI:98579;CHEBI:100270;CHEBI:100745;CHEBI:100892;CHEBI:101018;CHEBI:101738	ChEBI=CHEBI:95100		C25H39N3O5	C25H39N3O5		7.0972	6.3404
Negative	473.283	1.6	205.13414:3368 206.27063:501 211.04071:56 251.06387:95 267.12283:647 268.08087:62 373.26532:55 378.88501:77 388.19894:52 401.28348:119 402.18765:73 415.30499:84 416.32721:121 443.25558:635 444.46945:121 457.29144:5628 458.40515:2767 459.46042:229 473.36649:544	[M-H]-			0.69834	0.21327	Other	Naphthopyrans	Withanolides and derivatives	Scalarane sesterterpenoids	candelalide B	Pubescenol	rel-(3R,4R,5aS,5bR,7aS,11aS,11bR,13R,13aS)-3-hydroxy-4-methoxy-5b,8,8,11a,13a-pentamethyl-1-oxo-1,3,4,5,5a,5b,6,7,7a,8,9,10,11,11a,11b,12,13,13a-octadecahydrochryseno[2,1-c]furan-13-yl acetate	ChEBI=CHEBI:65572,UNPD=UNPD18502	HMDB=HMDB0030085,FooDB=FDB001396,UNPD=UNPD109254;UNPD56420;UNPD93102	ChEBI=CHEBI:68045,UNPD=UNPD172955;UNPD177399	C28H42O6	C28H42O6	C28H42O6	7.6192	7.4583	7.444
Positive	475.297	1.61	363.27094:2960 419.15714:9956 419.76282:58	[M+H]+			0.79654	-0.073432	Other	Withanolides and derivatives	Scalarane sesterterpenoids	Scalarane sesterterpenoids	Pubescenol	rel-(3R,4R,5aS,5bR,7aS,11aS,11bR,13R,13aS)-3-hydroxy-4-methoxy-5b,8,8,11a,13a-pentamethyl-1-oxo-1,3,4,5,5a,5b,6,7,7a,8,9,10,11,11a,11b,12,13,13a-octadecahydrochryseno[2,1-c]furan-13-yl acetate	12-O-acetyl-16-O-methylhyrtiolide	HMDB=HMDB0030085,FooDB=FDB001396,UNPD=UNPD109254;UNPD56420;UNPD93102	ChEBI=CHEBI:68045,UNPD=UNPD172955;UNPD177399	ChEBI=CHEBI:68039,UNPD=UNPD99676	C28H42O6	C28H42O6	C28H42O6	7.781	7.7553	7.741
Positive	475.451	11.33	149.16296:51 237.06818:51 293.39709:90 307.38638:187 309.34845:84 321.40134:592 331.35315:79 333.35406:58 335.39648:310 345.35703:79 349.37662:388 363.39246:201 377.43634:212 391.51981:120 405.35941:74 419.4274:578 439.41763:113 447.56271:387 457.44891:835	[M+H]+			0.22575	0.91897	Fatty acid	Wax monoesters	Wax monoesters	Wax monoesters	Linolenyl myristate	Myristyl linolenate	Myristoleyl linoleate	LipidMAPS=LMFA07010106	LipidMAPS=LMFA07010107	LipidMAPS=LMFA07010108	C32H58O2	C32H58O2	C32H58O2	7.049	7.049	6.9663
Negative	478.294	6.33	196.04527:73 214.00433:93 281.34265:5552	[M-H]-			0.13069	1.1197	Phospholipid	2-acyl-sn-glycero-3-phosphoethanolamines	1-acyl-sn-glycero-3-phosphoethanolamines	2-acyl-sn-glycero-3-phosphoethanolamines	LysoPE(0:0/18:1(9Z))	LysoPE(18:1(9Z)/0:0)	LysoPE(0:0/18:1(11Z))	HMDB=HMDB0011476,ChEBI=CHEBI:76088;CHEBI:76231,FooDB=FDB028192,BMDB=BMDB11476,LipidMAPS=LMGP02050040	HMDB=HMDB0011506,ChEBI=CHEBI:60287;CHEBI:74971;CHEBI:75168,YMDB=YMDB01207,FooDB=FDB028222,BMDB=BMDB11506,LipidMAPS=LMGP02050004,Feces=HMDB0011506,PubChem=58177709	HMDB=HMDB0011475,FooDB=FDB028191,BMDB=BMDB11475,LipidMAPS=LMGP02050039	C23H46NO7P	C23H46NO7P	C23H46NO7P	9.0151	9.0116	8.5984
Negative	488.238	1.88	373.59314:61	[M-H]-			0.09655	-0.38096	Other	Bipyridines and oligopyridines	Phenylacetamides		1-[[(2S,3S)-5-[(2R)-1-hydroxypropan-2-yl]-3-methyl-6-oxo-8-(3-pyridinyl)-3,4-dihydro-2H-pyrido[2,3-b][1,5]oxazocin-2-yl]methyl]-1-methyl-3-phenylurea	N-[[(2R,3R)-5-[(2S)-1-hydroxypropan-2-yl]-3-methyl-6-oxo-8-(5-pyrimidinyl)-3,4-dihydro-2H-pyrido[2,3-b][1,5]oxazocin-2-yl]methyl]-N-methyl-2-phenylacetamide		ChEBI=CHEBI:95638;CHEBI:95662;CHEBI:96043;CHEBI:96114;CHEBI:96298;CHEBI:96446;CHEBI:96556;CHEBI:96687	ChEBI=CHEBI:106095;CHEBI:106099;CHEBI:106145;CHEBI:106220;CHEBI:106275;CHEBI:106280;CHEBI:106355;CHEBI:131242		C27H31N5O4	C27H31N5O4		3.9177	3.9177
Positive	493.498	15.74	149.20941:51 209.17282:52 219.16241:355 223.2533:77 227.23058:84 237.19864:588 240.92163:108 251.18863:114 255.12225:601 269.07108:85	[M+H]+			0.19618	-0.94221	Other	Beta-diketones	Wax monoesters	Beta-diketones	Tritriacontane-16,18-dione	Heptadecyl palmitoleate	10,12-Tritriacontanedione	KNApSAcK=C00001271,ChEBI=CHEBI:9752,LipidMAPS=LMFA12000007,UNPD=UNPD112176	LipidMAPS=LMFA07010021	HMDB=HMDB0035578,FooDB=FDB014270	C33H64O2	C33H64O2	C33H64O2	7.1242	6.876	6.7072
Positive	494.324	9.9	184.13988:5868 258.07614:94 311.40512:89 417.37537:66 476.37613:14402 477.01401:69	[M+H]+			0.13837	1.2988	Phospholipid	1-acyl-sn-glycero-3-phosphocholines	2-acyl-sn-glycero-3-phosphocholines	1-acyl-sn-glycero-3-phosphoethanolamines	LysoPC(16:1(9Z))	2-[(9Z)-hexadecenoyl]-sn-glycero-3-phosphocholine	PE(19:1(9Z)/0:0)	HMDB=HMDB0010383,ChEBI=CHEBI:73851;CHEBI:84752,YMDB=YMDB01184;YMDB02210,FooDB=FDB027534,BMDB=BMDB10383,LipidMAPS=LMGP01050021;LMGP01050022,Urine=HMDB0010383,Serum=HMDB0010383,UNPD=UNPD157409	ChEBI=CHEBI:133515	LipidMAPS=LMGP02050019	C24H48NO7P	C24H48NO7P	C24H48NO7P	8.629	7.7979	7.792
Negative	499.274	1.55	283.33585:5641 284.422:230 419.28687:139	[M-H]-			0.10147	2.0116	No annotation
Positive	501.466	11.46	231.18542:77 263.29416:141 277.30692:55 291.31592:253 301.24738:52 319.25818:331 333.27258:51 347.2674:132 357.41159:55 375.42862:70 403.3732:51 417.49008:56 465.52673:181 473.52509:218 483.45172:870	[M+H]+			0.50254	0.30333	Fatty acid	Very long-chain fatty acids	Wax monoesters	Wax monoesters	(19Z,22Z,25Z,28Z)-tetratriacontatetraenoate	Palmitoleyl linolenate	Linolenyl palmitatoleate	ChEBI=CHEBI:77234;CHEBI:77536,LipidMAPS=LMFA01030828	LipidMAPS=LMFA07010121	LipidMAPS=LMFA07010120	C34H60O2	C34H60O2	C34H60O2	7.5894	6.9775	6.9546
Negative	503.162	0.7	143.14798:149 161.00371:1119 179.09933:1459 215.01335:64 221.0885:860 233.05005:117 251.06076:55 263.05835:505 280.73654:300 323.08063:6259 341.1572:1408	[M-H]-			0.058011	1.3233	Carbohydrate	Oligosaccharides	Oligosaccharides	Oligosaccharides	beta-D-Fructofuranosyl alpha-D-glucopyranosyl-(1->4)-D-glucopyranoside	Melezitose	6-Kestose	HMDB=HMDB0029930,ChEBI=CHEBI:55512,FooDB=FDB001194;FDB020842,UNPD=UNPD174769;UNPD23751;UNPD45918	HMDB=HMDB0011730,KNApSAcK=C00001141,ChEBI=CHEBI:6731;CHEBI:42894,FooDB=FDB001203,BMDB=BMDB11730,UNPD=UNPD19413;UNPD19489	HMDB=HMDB0033673,ChEBI=CHEBI:64833,FooDB=FDB011776;FDB020000,PubChem=9914062,PlantCyc=6-KESTOSE,UNPD=UNPD51151	C18H32O16	C18H32O16	C18H32O16	9.0924	9.0924	9.092
Positive	503.482	11.9	281.14859:51 307.3714:100 321.42633:245 335.49341:138 349.45132:157 363.28339:106 377.51053:62 467.54999:110 475.50494:97 485.52704:504	[M+H]+			0.11831	1.0966	Fatty acid	Wax monoesters	Wax monoesters	Wax monoesters	Linoleyl palmitatoleate	Palmitoleyl linoleate	Linolenyl palmitate	LipidMAPS=LMFA07010123	LipidMAPS=LMFA07010124	LipidMAPS=LMFA07010122	C34H62O2	C34H62O2	C34H62O2	6.8738	6.8738	6.8376
Positive	504.192	0.69	162.00507:236 306.62592:63 325.17041:71 486.79974:61	[M+H]+		yes	0.04683	3.9805	Carbohydrate	Oligosaccharides	Acridones	Harmala alkaloids	beta-D-Galactopyranosyl-(1->4)-2-amino-2-deoxy-beta-D-glucopyranosyl-(1->6)-D-mannose	Gravacridonediol glucoside	(1R)-N-(3,5-dimethyl-4-isoxazolyl)-1'-ethylsulfonyl-1-(hydroxymethyl)-7-methoxy-2-spiro[3,9-dihydro-1H-pyrido[3,4-b]indole-4,3'-azetidine]carboxamide	HMDB=HMDB0041224,FooDB=FDB021125	HMDB=HMDB0029328,KNApSAcK=C00024262,FooDB=FDB000389,UNPD=UNPD29238	ChEBI=CHEBI:128265;CHEBI:130489	C18H33NO15	C25H29NO10	C23H29N5O6S	5.8594	5.484	5.3615
Positive	516.426	10.39	327.24677:2466 355.26147:5031 499.44281:181	[M+H]+			0.79113	-0.36706	No annotation
Positive	518.493	10.94	189.33813:81 206.24011:62 224.23143:88 312.46509:92 336.48132:165 434.42157:75 500.43854:2366	[M+H]+		YES	0.022765	1.5994	No annotation
Positive	520.509	11.18	208.20996:759 209.06583:61 226.26222:856 312.37018:491 324.40997:96 336.44995:1557 490.40216:76 502.52478:8337 503.21027:81	[M+H]+		YES	0.036408	1.1259	No annotation
Positive	522.197	14.34	162.92818:114 258.83008:190 270.84796:91 276.34741:58 277.07544:116 288.80548:633 307.20636:56 324.83405:3672 342.22839:281 343.01129:1670 486.07526:370 486.70172:1622 487.3833:51 503.70844:127 504.73517:1057	[M+H]+			0.59802	-0.63436	Flavonoid-like	Isoflavonoid O-glycosides	Flavonoid O-glycosides	Aurone O-glycosides	3-(3,4-dimethoxyphenyl)-7-methoxy-8-methyl-5-{[3,4,5-trihydroxy-6-(hydroxymethyl)oxan-2-yl]oxy}-4H-chromen-4-one	6-Hydroxykaempferol 3,5,7,4'-tetramethyl ether 6-rhamnoside;6-[(6-Deoxy-alpha-L-mannopyranosyl)oxy]-3,5,7-trimethoxy-2-(4-methoxyphenyl)-4H-1-benzopyran-4-one	6-Hydroxy-5-methyl-3',4',5'-trimethoxyaurone-4-O-alpha-L-rhamnopyranoside	HMDB=HMDB0129571	KNApSAcK=C00013827,LipidMAPS=LMPK12112849,UNPD=UNPD32390	KNApSAcK=C00011146,LipidMAPS=LMPK12130045,UNPD=UNPD127867;UNPD179362;UNPD226470	C25H28O11	C25H28O11	C25H28O11	5.6269	5.6246	5.6062
Positive	522.203	0.7	325.03687:233 342.99597:85 486.85815:68 504.84973:59	[M+H]+			0.13768	1.2387	Glycoside	Terpene glycosides	Terpene glycosides		Lonijaposide E	Lonijaposide M		ChEBI=CHEBI:69643,UNPD=UNPD220452	ChEBI=CHEBI:69651,UNPD=UNPD226804		C25H31NO11	C25H31NO11		6.495	6.4793
Positive	522.355	9.8	184.16507:1886 504.44836:5057	[M+H]+			0.12204	1.3911	Phospholipid	1-acyl-sn-glycero-3-phosphocholines	1-acyl-sn-glycero-3-phosphocholines	2-acyl-sn-glycero-3-phosphocholines	LysoPC(18:1(11Z))	LysoPC(18:1(9Z))	PC(0:0/18:1(6Z))	HMDB=HMDB0010385,ChEBI=CHEBI:86255,YMDB=YMDB02211,FooDB=FDB027536,BMDB=BMDB10385,LipidMAPS=LMGP01050138,Serum=HMDB0010385	HMDB=HMDB0002815,ChEBI=CHEBI:28610;CHEBI:72589,YMDB=YMDB01190;YMDB01810,FooDB=FDB005287;FDB023066,BMDB=BMDB02815,LipidMAPS=LMGP01050030;LMGP01050032;LMGP01050114,Feces=HMDB0002815,Serum=HMDB0002815,UNPD=UNPD65944	LipidMAPS=LMGP01050079	C26H52NO7P	C26H52NO7P	C26H52NO7P	8.0924	8.0924	7.2602
Positive	523.472	12.07	193.37698:63 210.97928:58 238.91089:102	[M+H]+			0.12185	-0.62168	No annotation
Negative	527.305	1.54	311.30237:5526 312.36011:323 447.41345:68	[M-H]-			0.11104	2.6102	Other	Milbemycins			milbemycin A3			ChEBI=CHEBI:39228,STOFF=STOFF_4353,UNPD=UNPD71842			C31H44O7			7.6824
Positive	527.482	11.6	219.10156:53 263.17929:120 265.2345:57 317.25598:108 319.24426:60 322.86108:189 373.37695:148 387.40326:104 401.44055:84 415.56573:65 425.53827:59 429.33838:79 491.5827:214 499.44769:88 509.44702:1189	[M+H]+	yes	yes	0.035343	2.2449	Fatty acid	Very long-chain fatty acids	Very long-chain fatty acids	Wax monoesters	(18Z,21Z,24Z,27Z,30Z)-hexatriacontapentaenoate	(21Z,24Z,27Z,30Z,33Z)-hexatriacontapentaenoate	Palmitoleyl arachidonate	ChEBI=CHEBI:87349;CHEBI:87612,LipidMAPS=LMFA01030850	ChEBI=CHEBI:77216;CHEBI:77499,LipidMAPS=LMFA01030836	LipidMAPS=LMFA07010144	C36H62O2	C36H62O2	C36H62O2	7.2755	7.2643	6.7357
Positive	533.529	17.17	217.19809:67 219.269:228 227.24471:54 235.21756:117 237.30557:313 255.13913:519 515.88873:836	[M+H]+			0.36984	-0.97805	Fatty acid	Wax monoesters	Wax monoesters	Wax monoesters	oleyl oleate	Stearyl linoleate	Linoleyl stearate	ChEBI=CHEBI:75626,LipidMAPS=LMFA07010153,UNPD=UNPD6012	LipidMAPS=LMFA07010154	LipidMAPS=LMFA07010152	C36H68O2	C36H68O2	C36H68O2	6.4269	6.3039	6.2802
Positive	535.545	12.84	171.06912:53 185.09879:51 209.25285:87 219.16647:344 237.09569:449 255.14124:639 265.44873:50 283.2724:59 299.41821:73	[M+H]+			0.19069	-0.92857	Fatty acid	Wax monoesters	Wax monoesters	Wax monoesters	stearyl oleate	8E-octadecenyl heptadecanoate	Arachidyl palmitoleate	ChEBI=CHEBI:75625,LipidMAPS=LMFA07010159	LipidMAPS=LMFA07010005	LipidMAPS=LMFA07010024	C36H70O2	C36H70O2	C36H70O2	7.5673	7.1608	7.1605
Positive	537.488	12.26	225.15685:58 238.96585:55 281.22198:58 519.92877:114	[M+H]+			0.09655	-0.87443	Fatty acid	Long-chain fatty acids	Long-chain fatty acids	Long-chain fatty acids	FAHFA(16:1(9Z)/13-O-18:0)	FAHFA(16:1(9Z)/5-O-18:0)	FAHFA(16:1(9Z)/9-O-18:0)	HMDB=HMDB0112139,ChEBI=CHEBI:136315;CHEBI:137086,LipidMAPS=LMFA07011057	HMDB=HMDB0112134,ChEBI=CHEBI:136369;CHEBI:137102,LipidMAPS=LMFA07011050	HMDB=HMDB0112108,ChEBI=CHEBI:136309;CHEBI:137084,LipidMAPS=LMFA07011053	C34H64O4	C34H64O4	C34H64O4	6.817	6.8109	6.8056
Positive	544.457	11.11	293.20538:97 355.36115:2690 383.39813:1386 527.34912:1695	[M+H]+			0.4326	-3.1311	No annotation
Positive	546.524	11.55	189.10426:87 206.16858:65 224.2296:124 312.48004:67 336.40466:151 340.323:139 352.52667:51 364.43579:311 462.4696:63 484.81317:75 528.5238:4341	[M+H]+		YES	0.024939	1.2906	No annotation
Positive	548.504	12.58	251.97862:57 419.09387:101 474.5719:226 475.19171:1428 530.85413:185 531.49628:109	[M+H]+			0.06935	-0.85395	No annotation
Positive	548.54	12.12	208.24733:2124 226.25696:134 236.32477:396 340.36938:150 364.38843:86 518.25189:130 530.52899:1072	[M+H]+			0.070465	1.4131	No annotation
Positive	549.488	12.21	237.20547:153 313.28632:197	[M+H]+		yes	0.046282	1.1584	Other	Annonaceous acetogenins	Annonaceous acetogenins		Cohibin B	Cohibin A		HMDB=HMDB0031169,KNApSAcK=C00044130,FooDB=FDB003185,UNPD=UNPD127135	HMDB=HMDB0031168,KNApSAcK=C00044129,FooDB=FDB003184,UNPD=UNPD176812		C35H64O4	C35H64O4		7.4233	7.3081
Positive	551.503	12.79	238.9348:234	[M+H]+			0.0888	-0.93781	Other	Annonaceous acetogenins	Annonaceous acetogenins	Annonaceous acetogenins	Artemoin A	Artemoin C	Artemoin B	HMDB=HMDB0033604,KNApSAcK=C00038512,ChEBI=CHEBI:134014,FooDB=FDB011692,UNPD=UNPD163052	HMDB=HMDB0033606,KNApSAcK=C00038514,ChEBI=CHEBI:134012,FooDB=FDB011694,UNPD=UNPD125050	HMDB=HMDB0033605,KNApSAcK=C00038513,ChEBI=CHEBI:134013,FooDB=FDB011693,UNPD=UNPD161763	C35H66O4	C35H66O4	C35H66O4	5.9473	5.9473	5.9473
Negative	563.183	0.69	503.12024:471	[M-H]-		yes	0.036901	1.7778	Other	Anthracenes	Phenolic glycosides	Flavonoid-7-O-glycosides	Aloinoside B	Cascaroside C	Pinocembrin 7-rhamnosylglucoside;Pinocembrin 7-O-neohesperidoside	HMDB=HMDB0035784,ChEBI=CHEBI:81331;CHEBI:81332,FooDB=FDB014533;FDB021348,UNPD=UNPD121974	HMDB=HMDB0035757,KNApSAcK=C00031651;C00031652,ChEBI=CHEBI:80737;CHEBI:80738,FooDB=FDB014492;FDB014532,UNPD=UNPD37113;UNPD45582	KNApSAcK=C00000993,ChEBI=CHEBI:8222,LipidMAPS=LMPK12140136,UNPD=UNPD177033;UNPD24850	C27H32O13	C27H32O13	C27H32O13	8.3374	8.3278	8.3258
Positive	565.519	13.04	548.49921:61	[M+H]+			0.10147	-1.4381	No annotation
Positive	566.55	1.85	281.39209:234 282.38977:310 283.25507:79 299.2912:76 309.40991:365 310.35907:358 311.20532:173 464.50891:88 530.37653:56 548.53619:1824	[M+H]+			0.035518	0.92949	Ceramide	Ceramides	Long-chain ceramides	Long-chain ceramides	N-Stearoylsphingosine	Cer(d18:0/18:1(9Z))	Cer(d18:0/18:1(11Z))	HMDB=HMDB0000829;HMDB0004950,ChEBI=CHEBI:72961,SMPDB=PW_C002313,FooDB=FDB022270;FDB023537,BMDB=BMDB00829;BMDB04950,LipidMAPS=LMSP02010006,Feces=HMDB0004950,Serum=HMDB0004950,PubChem=5283565,UNPD=UNPD131046	HMDB=HMDB0011763,ChEBI=CHEBI:74100,FooDB=FDB028433,BMDB=BMDB11763,LipidMAPS=LMSP02020015,Serum=HMDB0011763	HMDB=HMDB0011762,ChEBI=CHEBI:88431,FooDB=FDB028432,BMDB=BMDB11762,Serum=HMDB0011762	C36H71NO3	C36H71NO3	C36H71NO3	8.6401	8.6181	8.2015
Positive	573.487	11.05	219.36328:51 237.19942:209 245.31155:103 263.21112:178 311.46387:157 319.28845:188 337.42853:87 481.55701:81 499.35388:273 510.84521:77 512.02118:65 517.38354:91 555.42474:59	[M+H]+			0.02406	0.83284	Other	Annonaceous acetogenins			Dieporeticenin			HMDB=HMDB0029792,KNApSAcK=C00044147,FooDB=FDB000999,UNPD=UNPD190188			C37H64O4			7.1195
Positive	574.556	12.15	364.33649:182 392.32861:98 500.63751:65 512.68408:115 543.98676:51 556.49896:2586	[M+H]+			0.068489	0.88641	No annotation
Positive	575.504	12.34	237.25726:165 247.23773:50 265.35388:223 311.17987:109 339.30548:110 512.78876:139	[M+H]+			0.081293	0.92847	Fatty acid	Lineolic acids and derivatives	1,2-diacylglycerols	1,2-diacylglycerols	DG(16:0/18:2(9Z,12Z)/0:0)	DG(14:0/20:2(11Z,14Z)/0:0)	DG(14:1(9Z)/20:1(11Z)/0:0)	HMDB=HMDB0007103,ChEBI=CHEBI:82927,FooDB=FDB024297,BMDB=BMDB07103,LipidMAPS=LMGL02010027,Serum=HMDB0007103	HMDB=HMDB0007022,ChEBI=CHEBI:88796,FooDB=FDB024216,BMDB=BMDB07022,LipidMAPS=LMGL02010390,Serum=HMDB0007022	HMDB=HMDB0007050,ChEBI=CHEBI:88725,FooDB=FDB024244,BMDB=BMDB07050,LipidMAPS=LMGL02010413,Serum=HMDB0007050	C37H68O5	C37H68O5	C37H68O5	7.5838	7.5583	7.4427
Positive	576.193	12.18	234.07964:9726	[M+H]+			0.13847	-0.80783	No annotation
Positive	577.519	11.91	239.25371:50 247.27176:58 265.2699:139 503.63776:147	[M+H]+			0.0888	0.80605	Other	Annonaceous acetogenins	Fatty alcohols	Annonaceous acetogenins	Cohibin C	phenolic phthiocerol	Cohibin D	HMDB=HMDB0035397,KNApSAcK=C00047030,ChEBI=CHEBI:134015,FooDB=FDB014072	ChEBI=CHEBI:59237,LipidMAPS=LMFA05000691	KNApSAcK=C00047031,ChEBI=CHEBI:134016	C37H68O4	C37H68O4	C37H68O4	7.8684	7.7004	7.4848
Positive	579.535	13.71	239.19098:100 267.29474:59	[M+H]+			0.087623	-1.0197	No annotation
Negative	587.275	1.6	473.5448:91	[M-H]-			0.75755	0.16222	No annotation
Positive	594.216	14.05	252.23344:99 271.16068:96 288.72986:368 324.39545:171 325.01697:1053 342.56525:146 414.31854:64 431.51819:52 432.16724:255	[M+H]+		YES	0.022765	4.1958	No annotation
Negative	606.302	2.21	407.36066:266 433.41077:152 478.48572:63 492.43976:108	[M-H]-			0.2858	1.2287	Phospholipid	Prostaglandins and related compounds			2-[(9S,11R)-epidioxy-(15S)-hydroperoxy-(5Z,13E)-prostadienoyl]-sn-glycero-3- phosphocholine			ChEBI=CHEBI:138100			C28H50NO11P			7.6908
Negative	634.332	2.17	281.27783:52 435.34473:241 461.21802:112 520.36755:113	[M-H]-			0.23173	1.3171	No annotation
Negative	645.477	1.55	283.25848:129 361.38507:303	[M-H]-			0.076549	1.8496	Glycoside	Steroidal glycosides	1-alkyl,2-acylglycerophosphates	1-(1Z-alkenyl),2-acyl-glycerophosphates	cholesteryl 6-O-hexanoyl-beta-D-galactoside	PA(O-18:0/15:1(9Z))	PA(P-16:0/17:0)	ChEBI=CHEBI:61651	LipidMAPS=LMGP10020024	LipidMAPS=LMGP10030009	C39H66O7	C36H71O7P	C36H71O7P	7.2111	6.9365	6.8822
Positive	647.459	13.46	235.17909:198 273.15289:65 291.18036:158 329.16611:208 347.23712:360 385.18018:527 441.36145:1405 479.18524:79 535.41241:85 591.40106:875	[M+H]+			0.088689	-0.90119	Phospholipid	1,2-diacylglycerol-3-phosphates	1,2-diacylglycerol-3-phosphates	1,2-diacylglycerol-3-phosphates	Glycerol 1-(9Z-octadecenoate) 2-tetradecanoate 3-phosphate	PA(18:0/14:1(9Z))	1-myristoyl-2-oleoyl-sn-glycero-3-phosphate(2-)	HMDB=HMDB0031131;HMDB0114921,ChEBI=CHEBI:74579;CHEBI:74930,FooDB=FDB003142,LipidMAPS=LMGP10010882	HMDB=HMDB0114874,LipidMAPS=LMGP10010307	ChEBI=CHEBI:74586;CHEBI:74943,LipidMAPS=LMGP10010019	C35H67O8P	C35H67O8P	C35H67O8P	8.5425	8.1524	8.1325
Positive	652.222	14.19	193.20596:67 270.767:119 277.08057:78 288.98615:247 306.70853:58 310.24011:104 325.04962:993 342.71503:198 486.90332:72 489.87109:247	[M+H]+			0.1507	1.6995	Peptide	Peptides			2-amino-4-({1-[(carboxymethyl)-C-hydroxycarbonimidoyl]-2-[(4-{[8-(2-hydroxypropan-2-yl)-2-oxo-2H,8H,9H-furo[2,3-h]chromen-9-yl]oxy}-3-methyl-4-oxobutan-2-yl)sulfanyl]ethyl}-C-hydroxycarbonimidoyl)butanoic acid			HMDB=HMDB0129101			C29H37N3O12S			6.1471
Negative	658.795	2.14	544.8476:4508 561.69177:72 562.30878:143 640.86493:5583 658.64099:1530	[M-H]-			0.4326	2.9886	No annotation
Positive	663.454	1.78	495.25549:2576 551.24414:24509 607.26135:51455 644.65546:53	[M+H]+			0.18292	0.25031	Glycoside	Cucurbitacin glycosides			Goyaglycoside c			HMDB=HMDB0038349,KNApSAcK=C00030425;C00030426,FooDB=FDB017685;FDB017686,UNPD=UNPD24869;UNPD52603;UNPD212307			C38H62O9			7.7783
Positive	664.102	13.94	232.18329:628 348.09827:97 410.10828:72 428.08075:615 444.1311:127 524.04156:12371 529.09973:58 541.95343:14276	[M+H]+			0.44522	4.1773	No annotation
Negative	665.215	0.69	485.1911:97	[M-H]-		yes	0.02406	3.7965	Carbohydrate	Oligosaccharides	Oligosaccharides	Oligosaccharides	3-beta-Cellobiosylcellobiose	Bifurcose	Stachyose	HMDB=HMDB0039174,ChEBI=CHEBI:61805,FooDB=FDB018701,UNPD=UNPD26648;UNPD62996	HMDB=HMDB0038490,ChEBI=CHEBI:64835,FooDB=FDB017862,PubChem=25202989,PlantCyc=BIFURCOSE,UNPD=UNPD38810	HMDB=HMDB0003553,KNApSAcK=C00001150,ChEBI=CHEBI:17164;CHEBI:60167,SMPDB=PW_C001923,FooDB=FDB012320,BMDB=BMDB03553,ECMDB=ECMDB03553,PubChem=439531,PlantCyc=CPD-170,UNPD=UNPD176984;UNPD192499;UNPD25169	C24H42O21	C24H42O21	C24H42O21	8.671	8.671	8.671
Negative	678.527	1.84	395.83722:53	[M-H]-			0.2083	1.0192	No annotation
Negative	683.225	0.7	341.1665:6329	[M-H]-			0.38064	1.4552	Other	Acridones			Citbismine C			HMDB=HMDB0041435,FooDB=FDB021386,UNPD=UNPD14269			C37H36N2O11			7.5792
Positive	684.255	14.78	358.14392:52 429.02167:143	[M+H]+			0.0888	-0.86292	No annotation
Positive	684.256	15.05	341.07684:101 429.15594:65 666.54816:146	[M+H]+			0.11581	-0.53376	No annotation
Negative	688.487	2.17	253.21021:1371 254.53017:117 255.34764:481 452.42938:228	[M-H]-			0.19618	0.36295	Phospholipid	Phosphatidylethanolamines	Phosphatidylethanolamines	Phosphatidylethanolamines	PE(16:0/16:1(9Z))	PE(18:1(9Z)/14:0)	PE(14:0/18:1(9Z))	HMDB=HMDB0008924,ChEBI=CHEBI:73999,YMDB=YMDB01199,FooDB=FDB026114,BMDB=BMDB08924,LipidMAPS=LMGP02011228,ECMDB=ECMDB08924	HMDB=HMDB0009052,ChEBI=CHEBI:78814;CHEBI:82840,FooDB=FDB026242,BMDB=BMDB09052,LipidMAPS=LMGP02011199	HMDB=HMDB0008828,ChEBI=CHEBI:84300;CHEBI:85237,FooDB=FDB026018,BMDB=BMDB08828,LipidMAPS=LMGP02011247	C37H72NO8P	C37H72NO8P	C37H72NO8P	7.8286	7.7736	7.7736
Positive	690.506	3.07	293.271:59 547.44788:91 549.49622:14080 672.1554:87	[M+H]+			0.19811	0.34691	No annotation
Positive	710.474	10.86	569.40417:282 666.8808:61 667.50995:873	[M+H]+			0.063613	2.9536	Phospholipid	Phosphatidylethanolamines	Phosphatidylethanolamines	Phosphatidylethanolamines	PE(20:4(5Z,8Z,11Z,14Z)/14:1(9Z))	PE(20:5(5Z,8Z,11Z,14Z,17Z)/14:0)	PE(14:1(9Z)/20:4(5Z,8Z,11Z,14Z))	HMDB=HMDB0009383,FooDB=FDB026573,BMDB=BMDB09383,LipidMAPS=LMGP02010936	HMDB=HMDB0009448,FooDB=FDB026638,BMDB=BMDB09448,LipidMAPS=LMGP02010964	HMDB=HMDB0008871,FooDB=FDB026061,BMDB=BMDB08871,LipidMAPS=LMGP02010444	C39H68NO8P	C39H68NO8P	C39H68NO8P	6.7486	6.7486	6.7486
Positive	712.489	11.34	549.45428:61 571.47992:347 589.48553:62 669.28845:2052	[M+H]+	yes	yes	0.035343	2.8292	Phospholipid	Phosphatidylethanolamines	Phosphatidylethanolamines	Phosphatidylethanolamines	PE(16:1(9Z)/18:3(9Z,12Z,15Z))	PE(16:1(9Z)/18:3(6Z,9Z,12Z))	PE(20:3(8Z,11Z,14Z)/14:1(9Z))	HMDB=HMDB0008963,FooDB=FDB026153,BMDB=BMDB08963,LipidMAPS=LMGP02010526	HMDB=HMDB0008962,BMDB=BMDB08962,LipidMAPS=LMGP02010525	HMDB=HMDB0009350,FooDB=FDB026540,BMDB=BMDB09350,LipidMAPS=LMGP02010905	C39H70NO8P	C39H70NO8P	C39H70NO8P	8.2273	8.2273	8.2273
Negative	714.506	2.14	253.36551:500 279.33859:174 281.37469:980 450.33105:68 478.36292:128	[M-H]-			0.32157	0.32166	Phospholipid	Phosphatidylethanolamines	Phosphatidylethanolamines	Phosphatidylethanolamines	PE(18:1(9Z)/16:1(9Z))	PE(16:0/18:2(9Z,12Z))	PE(16:1(9Z)/18:1(9Z))	HMDB=HMDB0009056,ChEBI=CHEBI:78810;CHEBI:82837,FooDB=FDB026246,BMDB=BMDB09056,LipidMAPS=LMGP02011198	HMDB=HMDB0008928,ChEBI=CHEBI:73008;CHEBI:73121,FooDB=FDB026118,BMDB=BMDB08928,LipidMAPS=LMGP02010042,UNPD=UNPD147922	HMDB=HMDB0008960,YMDB=YMDB01203,FooDB=FDB026150,BMDB=BMDB08960,LipidMAPS=LMGP02011220	C39H74NO8P	C39H74NO8P	C39H74NO8P	8.3221	8.2957	7.9055
Negative	714.507	2.99	253.1825:865 255.37439:93 279.30576:180 281.2258:1761 450.38391:113 452.0705:65 478.34259:67	[M-H]-			0.026599	0.93188	Phospholipid	Phosphatidylethanolamines	Phosphatidylethanolamines	Phosphatidylethanolamines	PE(18:1(9Z)/16:1(9Z))	PE(16:0/18:2(9Z,12Z))	PE(16:1(9Z)/18:1(9Z))	HMDB=HMDB0009056,ChEBI=CHEBI:78810;CHEBI:82837,FooDB=FDB026246,BMDB=BMDB09056,LipidMAPS=LMGP02011198	HMDB=HMDB0008928,ChEBI=CHEBI:73008;CHEBI:73121,FooDB=FDB026118,BMDB=BMDB08928,LipidMAPS=LMGP02010042,UNPD=UNPD147922	HMDB=HMDB0008960,YMDB=YMDB01203,FooDB=FDB026150,BMDB=BMDB08960,LipidMAPS=LMGP02011220	C39H74NO8P	C39H74NO8P	C39H74NO8P	8.3407	8.3144	7.924
Negative	714.508	11.45	253.29231:287 281.27838:364 450.25958:65	[M-H]-			0.11432	2.2751	Phospholipid	Phosphatidylethanolamines	Phosphatidylethanolamines	Phosphatidylethanolamines	PE(18:1(9Z)/16:1(9Z))	PE(16:0/18:2(9Z,12Z))	PE(16:1(9Z)/18:1(9Z))	HMDB=HMDB0009056,ChEBI=CHEBI:78810;CHEBI:82837,FooDB=FDB026246,BMDB=BMDB09056,LipidMAPS=LMGP02011198	HMDB=HMDB0008928,ChEBI=CHEBI:73008;CHEBI:73121,FooDB=FDB026118,BMDB=BMDB08928,LipidMAPS=LMGP02010042,UNPD=UNPD147922	HMDB=HMDB0008960,YMDB=YMDB01203,FooDB=FDB026150,BMDB=BMDB08960,LipidMAPS=LMGP02011220	C39H74NO8P	C39H74NO8P	C39H74NO8P	8.9007	8.8685	8.4841
Positive	716.522	2.99	308.29559:66 339.33783:57 340.49066:82 416.41522:59 575.43793:27040 576.19281:122	[M+H]+			0.33491	0.27302	Phospholipid	Phosphatidylethanolamines	Phosphatidylethanolamines	Phosphatidylethanolamines	PE(18:1(9Z)/16:1(9Z))	PE(16:0/18:2(9Z,12Z))	PE(20:1(11Z)/14:1(9Z))	HMDB=HMDB0009056,ChEBI=CHEBI:78810;CHEBI:82837,FooDB=FDB026246,BMDB=BMDB09056,LipidMAPS=LMGP02011198	HMDB=HMDB0008928,ChEBI=CHEBI:73008;CHEBI:73121,FooDB=FDB026118,BMDB=BMDB08928,LipidMAPS=LMGP02010042,UNPD=UNPD147922	HMDB=HMDB0009251,FooDB=FDB026441,BMDB=BMDB09251,LipidMAPS=LMGP02010844	C39H74NO8P	C39H74NO8P	C39H74NO8P	8.572	8.5713	8.1553
Negative	719.486	2.01	253.26935:785 255.23479:564 389.06:61 391.30603:154 465.38239:160 483.43616:97	[M-H]-			0.12823	0.43517	Phospholipid	Phosphatidylglycerols	Phosphatidylglycerols	Phosphatidylglycerols	PG(16:1(9Z)/16:0)	PG(16:0/16:1(9Z))	1-myristoyl-2-oleoyl-sn-glycero-3-phosphatidylglycerol(1-)	HMDB=HMDB0010585,FooDB=FDB027735,BMDB=BMDB10585,LipidMAPS=LMGP04010207,ECMDB=ECMDB10585	HMDB=HMDB0010571,YMDB=YMDB01209,BMDB=BMDB10571,LipidMAPS=LMGP04010910,ECMDB=ECMDB10571	ChEBI=CHEBI:75161,LipidMAPS=LMGP04010984	C38H73O10P	C38H73O10P	C38H73O10P	8.221	8.221	8.1658
Positive	720.228	14.44	216.09193:458	[M+H]+			0.69834	-0.15462	No annotation
Positive	731.606	9.32	713.33746:367	[M+H]+			0.051766	1.2552	Sphingolipid	Phosphosphingolipids	Phosphosphingolipids	Phosphocholines	SM(d18:0/18:1(9Z))	SM(d18:0/18:1(11Z))	N-nonadecanoyl-15-methylhexadecasphing-4-enine-1-phosphocholine	HMDB=HMDB0012089,ChEBI=CHEBI:134074,FooDB=FDB028756,BMDB=BMDB12089,LipidMAPS=LMSP03010031,Serum=HMDB0012089	HMDB=HMDB0012088,ChEBI=CHEBI:134073,FooDB=FDB028755,BMDB=BMDB12088,Serum=HMDB0012088	ChEBI=CHEBI:70889	C41H83N2O6P	C41H83N2O6P	C41H83N2O6P	6.136	5.7193	5.3027
Positive	732.553	7.95	476.52631:68 478.38068:177 496.28796:77	[M+H]+	yes	yes	0.035343	1.0014	Phospholipid	Phosphatidylcholines	Phosphatidylcholines	Phosphatidylcholines	PC(16:0/16:1(9Z))	PC(16:1(9Z)/16:0)	PC(14:0/18:1(11Z))	HMDB=HMDB0007969,ChEBI=CHEBI:74000,YMDB=YMDB01181,FooDB=FDB025160,BMDB=BMDB07969,LipidMAPS=LMGP01010566,Urine=HMDB0007969,Serum=HMDB0007969	HMDB=HMDB0008001,ChEBI=CHEBI:89731,YMDB=YMDB01864,FooDB=FDB025192,BMDB=BMDB08001,LipidMAPS=LMGP01011479,Urine=HMDB0008001,Serum=HMDB0008001	HMDB=HMDB0007872,ChEBI=CHEBI:73793,YMDB=YMDB01813,FooDB=FDB025064,BMDB=BMDB07872,LipidMAPS=LMGP01010490,Urine=HMDB0007872,Serum=HMDB0007872	C40H78NO8P	C40H78NO8P	C40H78NO8P	8.2516	8.2516	8.2316
Positive	738.505	11.44	441.22485:77 575.43585:280 597.50433:1228 615.68677:137 694.71277:366 695.42285:5321	[M+H]+	yes	yes	0.022765	2.2142	Phospholipid	Phosphatidylethanolamines	Phosphatidylethanolamines	Phosphatidylethanolamines	PE(20:5(5Z,8Z,11Z,14Z,17Z)/16:0)	PE(16:0/20:5(5Z,8Z,11Z,14Z,17Z))	PE(18:1(9Z)/18:4(6Z,9Z,12Z,15Z))	HMDB=HMDB0009451,FooDB=FDB026641,BMDB=BMDB09451,LipidMAPS=LMGP02010968	HMDB=HMDB0008939,FooDB=FDB026129,BMDB=BMDB08939,LipidMAPS=LMGP02011221	HMDB=HMDB0009063,FooDB=FDB026253,BMDB=BMDB09063,LipidMAPS=LMGP02010644	C41H72NO8P	C41H72NO8P	C41H72NO8P	7.7157	7.7157	7.7157
Positive	740.516	11.4	697.41956:171	[M+H]+			0.066356	3.0093	Phospholipid	Phosphatidylethanolamines	Phosphatidylethanolamines	Phosphatidylethanolamines	PE(18:2(9Z,12Z)/18:2(9Z,12Z))	PE(16:0/20:4(5Z,8Z,11Z,14Z))	1,2-di-(6Z,9Z-octadecadienoyl)-sn-glycero-3-phosphoethanolamine	HMDB=HMDB0009093,ChEBI=CHEBI:84846,FooDB=FDB026283,BMDB=BMDB09093,LipidMAPS=LMGP02010111	HMDB=HMDB0008937,ChEBI=CHEBI:73009;CHEBI:73117,FooDB=FDB026127,BMDB=BMDB08937,LipidMAPS=LMGP02010096	ChEBI=CHEBI:84848,LipidMAPS=LMGP02010112	C41H74NO8P	C41H74NO8P	C41H74NO8P	8.7072	8.7057	8.2905
Negative	740.52	2.14	279.25708:616 281.29156:1416 476.44891:226 478.28265:120	[M-H]-			0.09655	0.75024	Phospholipid	Phosphatidylethanolamines	Phosphatidylethanolamines	Phosphatidylethanolamines	PE(18:1(9Z)/18:2(9Z,12Z))	PE(16:0/20:3(8Z,11Z,14Z))	PE(18:2(9Z,12Z)/18:1(9Z))	HMDB=HMDB0009060,ChEBI=CHEBI:74977;CHEBI:84543,FooDB=FDB026250,BMDB=BMDB09060,LipidMAPS=LMGP02010048	HMDB=HMDB0008936,ChEBI=CHEBI:133655;CHEBI:133656,FooDB=FDB026126,BMDB=BMDB08936,LipidMAPS=LMGP02011222	HMDB=HMDB0009092,FooDB=FDB026282,BMDB=BMDB09092,LipidMAPS=LMGP02010663	C41H76NO8P	C41H76NO8P	C41H76NO8P	8.225	8.1414	7.8083
Positive	740.521	11.9	599.38409:179 617.57367:74 697.41803:1016	[M+H]+	yes	yes	0.036656	2.9201	Phospholipid	Phosphatidylethanolamines	Phosphatidylethanolamines	Phosphatidylethanolamines	PE(18:2(9Z,12Z)/18:2(9Z,12Z))	PE(16:0/20:4(5Z,8Z,11Z,14Z))	1,2-di-(6Z,9Z-octadecadienoyl)-sn-glycero-3-phosphoethanolamine	HMDB=HMDB0009093,ChEBI=CHEBI:84846,FooDB=FDB026283,BMDB=BMDB09093,LipidMAPS=LMGP02010111	HMDB=HMDB0008937,ChEBI=CHEBI:73009;CHEBI:73117,FooDB=FDB026127,BMDB=BMDB08937,LipidMAPS=LMGP02010096	ChEBI=CHEBI:84848,LipidMAPS=LMGP02010112	C41H74NO8P	C41H74NO8P	C41H74NO8P	8.5767	8.5725	8.1601
Negative	740.525	11.61	279.33945:115 281.20593:119	[M-H]-			0.058011	3.8859	Phospholipid	Phosphatidylethanolamines	Phosphatidylethanolamines	Phosphatidylethanolamines	PE(18:1(9Z)/18:2(9Z,12Z))	PE(16:0/20:3(8Z,11Z,14Z))	PE(18:2(9Z,12Z)/18:1(9Z))	HMDB=HMDB0009060,ChEBI=CHEBI:74977;CHEBI:84543,FooDB=FDB026250,BMDB=BMDB09060,LipidMAPS=LMGP02010048	HMDB=HMDB0008936,ChEBI=CHEBI:133655;CHEBI:133656,FooDB=FDB026126,BMDB=BMDB08936,LipidMAPS=LMGP02011222	HMDB=HMDB0009092,FooDB=FDB026282,BMDB=BMDB09092,LipidMAPS=LMGP02010663	C41H76NO8P	C41H76NO8P	C41H76NO8P	7.8175	7.6966	7.4008
Positive	744.553	2.94	601.38104:127 603.44781:12179	[M+H]+			0.3194	0.31309	Phospholipid	Phosphatidylethanolamines	Phosphatidylethanolamines	Phosphatidylcholines	PE(18:1(9Z)/18:1(9Z))	PE(18:0/18:2(9Z,12Z))	PC(15:0/18:2(9Z,12Z))	HMDB=HMDB0009059,ChEBI=CHEBI:60285;CHEBI:74986;CHEBI:84839;CHEBI:84844,YMDB=YMDB01208,FooDB=FDB026249,BMDB=BMDB09059,LipidMAPS=LMGP02010039;LMGP02010052,PubChem=44251425	HMDB=HMDB0008994,ChEBI=CHEBI:133599;CHEBI:133600,FooDB=FDB026184,BMDB=BMDB08994,LipidMAPS=LMGP02010044,PubChem=25245827,PlantCyc=CPD-8290	HMDB=HMDB0007940,ChEBI=CHEBI:133617,SMPDB=PW_C003990,FooDB=FDB025132,BMDB=BMDB07940,LipidMAPS=LMGP01010543	C41H78NO8P	C41H78NO8P	C41H78NO8P	8.9982	8.9975	8.8183
Negative	745.501	2.01	253.18451:512 255.2317:835 279.27338:2414 280.76746:229 281.37775:788 389.25195:116 391.2843:290 463.34308:59 465.37366:178 481.39667:89 483.4129:289 489.33795:108 491.55554:64 509.31586:115 715.49908:136	[M-H]-			0.05805	0.76269	Phospholipid	Phosphatidylglycerols	Phosphatidylglycerols	Phosphatidylglycerols	PG(16:0/18:2(9Z,12Z))	PG(18:2(9Z,12Z)/16:0)	PG(18:1(9Z)/16:1(9Z))	HMDB=HMDB0010575,ChEBI=CHEBI:72840;CHEBI:73238,FooDB=FDB027725,BMDB=BMDB10575,LipidMAPS=LMGP04010983,Serum=HMDB0010575,UNPD=UNPD141988	HMDB=HMDB0010645,ChEBI=CHEBI:89351,FooDB=FDB027795,BMDB=BMDB10645,LipidMAPS=LMGP04010877,Serum=HMDB0010645,PubChem=90658491,PlantCyc=CPD-8086	HMDB=HMDB0010631,ChEBI=CHEBI:89398,DrugBank=DB04683,BMDB=BMDB10631,LipidMAPS=LMGP04010881,Serum=HMDB0010631	C40H75O10P	C40H75O10P	C40H75O10P	8.0384	8.0384	7.9876
Negative	747.517	2.01	255.25262:530 279.32825:54 281.29584:1579 391.30042:213 465.41425:206 483.33527:126 673.6817:51 717.49689:56	[M-H]-			0.050648	0.62228	Phospholipid	Phosphatidylglycerols	Phosphatidylglycerols	Phosphatidylglycerols	PG(18:1(9Z)/16:0)	PG(16:0/18:1(11Z))	PG(16:0/18:1(9Z))	HMDB=HMDB0010630,ChEBI=CHEBI:72832;CHEBI:73206,BMDB=BMDB10630,LipidMAPS=LMGP04010962,Serum=HMDB0010630,PubChem=71296223,PlantCyc=CPD-2183	HMDB=HMDB0010573,ChEBI=CHEBI:44946,FooDB=FDB027723,BMDB=BMDB10573,LipidMAPS=LMGP04010008,ECMDB=ECMDB10573,Serum=HMDB0010573	HMDB=HMDB0010574,ChEBI=CHEBI:34080;CHEBI:72841;CHEBI:73234;CHEBI:84472,YMDB=YMDB01210,BMDB=BMDB10574,LipidMAPS=LMGP04010002;LMGP04010987,Serum=HMDB0010574	C40H77O10P	C40H77O10P	C40H77O10P	8.9264	8.9263	8.9263
Positive	764.521	11.6	623.5213:522 641.48126:60 720.82233:97 721.45178:1658	[M+H]+	yes	yes	0.029654	3.3782	Phospholipid	Phosphatidylethanolamines	Phosphatidylethanolamines	Phosphatidylethanolamines	PE(16:0/22:6(4Z,7Z,10Z,13Z,16Z,19Z))	PE(18:3(6Z,9Z,12Z)/20:3(8Z,11Z,14Z))	PE(18:4(6Z,9Z,12Z,15Z)/20:2(11Z,14Z))	HMDB=HMDB0008946,ChEBI=CHEBI:78261;CHEBI:79097,FooDB=FDB026136,BMDB=BMDB08946,LipidMAPS=LMGP02010095,UNPD=UNPD182353	HMDB=HMDB0009134,FooDB=FDB026324,BMDB=BMDB09134,LipidMAPS=LMGP02010701	HMDB=HMDB0009198,FooDB=FDB026388,BMDB=BMDB09198,LipidMAPS=LMGP02010759	C43H74NO8P	C43H74NO8P	C43H74NO8P	7.4676	7.0537	7.0537
Negative	768.481	10.87	253.30505:51 686.44025:905	[M-H]-			0.058662	5.6205	Phospholipid	Phosphatidylserines	Phosphatidylserines	Phosphatidylserines	PS(15:0/20:4(5Z,8Z,11Z,14Z))	PS(20:4(5Z,8Z,11Z,14Z)/15:0)	PS(18:4(6Z,9Z,12Z,15Z)/17:0)	HMDB=HMDB0112331,LipidMAPS=LMGP03010154	HMDB=HMDB0112636,LipidMAPS=LMGP03010624	LipidMAPS=LMGP03010433	C41H72NO10P	C41H72NO10P	C41H72NO10P	7.3404	7.2964	6.9349
Negative	770.497	11.35	688.39636:563	[M-H]-			0.058011	4.4675	Phospholipid	Phosphatidylserines	Phosphatidylserines	Phosphatidylserines	PS(15:0/20:3(8Z,11Z,14Z))	PS(20:3(8Z,11Z,14Z)/15:0)	PS(17:2(9Z,12Z)/18:1(9Z))	HMDB=HMDB0112330,LipidMAPS=LMGP03010153	HMDB=HMDB0112621,LipidMAPS=LMGP03010593	LipidMAPS=LMGP03010289	C41H74NO10P	C41H74NO10P	C41H74NO10P	7.8621	7.8621	7.5198
Positive	784.585	2.13	502.45416:240 504.24963:159 520.43701:84 599.19098:126 643.55573:96 724.48456:130	[M+H]+			0.02406	0.56672	Phospholipid	Phosphatidylcholines	Phosphatidylcholines	Phosphatidylcholines	PC(18:2(9Z,12Z)/18:1(11Z))	PC(18:1(11Z)/18:2(9Z,12Z))	PC(18:1(9Z)/18:2(9Z,12Z))	HMDB=HMDB0008136,ChEBI=CHEBI:89599,YMDB=YMDB01959,FooDB=FDB025326,BMDB=BMDB08136,LipidMAPS=LMGP01012168,Urine=HMDB0008136,Saliva=HMDB0008136,Serum=HMDB0008136	HMDB=HMDB0008072,ChEBI=CHEBI:89691,YMDB=YMDB01913,FooDB=FDB025263,BMDB=BMDB08072,LipidMAPS=LMGP01012149,Urine=HMDB0008072,Saliva=HMDB0008072,Serum=HMDB0008072	HMDB=HMDB0008105,ChEBI=CHEBI:74670,YMDB=YMDB01937,FooDB=FDB025295;FDB030211,BMDB=BMDB08105,LipidMAPS=LMGP01010895,Urine=HMDB0008105,Saliva=HMDB0008105,Serum=HMDB0008105,PubChem=24778939;15151374,PlantCyc=CPD-8091	C44H82NO8P	C44H82NO8P	C44H82NO8P	7.7889	7.7889	7.7742
Positive	786.6	2.18	502.27429:67 503.91882:76 504.66223:89 522.44952:94 601.362:190 645.55908:65	[M+H]+			0.77411	0.061536	Phospholipid	Phosphatidylcholines	Phosphatidylcholines	Phosphatidylcholines	PC(18:2(9Z,12Z)/18:0)	PC(18:0/18:2(9Z,12Z))	PC(18:1(9Z)/18:1(11Z))	HMDB=HMDB0008135,ChEBI=CHEBI:86112,YMDB=YMDB01958,FooDB=FDB025325,BMDB=BMDB08135,LipidMAPS=LMGP01010935,Urine=HMDB0008135,Saliva=HMDB0008135,Serum=HMDB0008135	HMDB=HMDB0008039,ChEBI=CHEBI:84822,YMDB=YMDB01891,FooDB=FDB025230,BMDB=BMDB08039,LipidMAPS=LMGP01010768,Urine=HMDB0008039,Saliva=HMDB0008039,Serum=HMDB0008039	HMDB=HMDB0008103,ChEBI=CHEBI:89604,YMDB=YMDB01936,FooDB=FDB025294,BMDB=BMDB08103,LipidMAPS=LMGP01012163,Urine=HMDB0008103,Saliva=HMDB0008103,Serum=HMDB0008103	C44H84NO8P	C44H84NO8P	C44H84NO8P	7.9551	7.9551	7.9368
Negative	796.511	11.45	714.45734:1365	[M-H]-			0.0888	3.6713	Phospholipid	Phosphatidylserines	Phosphatidylserines	Phosphatidylserines	1-heptadecanoyl-2-arachidonoyl-sn-glycero-3-phosphoserine(1-)	PS(15:0/22:4(7Z,10Z,13Z,16Z))	PS(22:4(7Z,10Z,13Z,16Z)/15:0)	ChEBI=CHEBI:84461;CHEBI:85400,LipidMAPS=LMGP03010003	HMDB=HMDB0112336,LipidMAPS=LMGP03010159	HMDB=HMDB0112790,LipidMAPS=LMGP03010791	C43H76NO10P	C43H76NO10P	C43H76NO10P	7.9673	7.9668	7.9668
Negative	800.469	2.07	713.47565:132	[M-H]-			0.23359	0.24824	No annotation
Negative	802.484	2.14	715.51886:52	[M-H]-			0.18273	0.34643	Other	Macrolide lactams	Macrolide lactams		Tacrolimus	tacrolimus hydrate		HMDB=HMDB0015002,ChEBI=CHEBI:61049;CHEBI:93221;CHEBI:94694;CHEBI:95162,DrugBank=DB00864,T3DB=T3D4732,FooDB=FDB011098,STOFF=STOFF_5170,LipidMAPS=LMPK04000003,Urine=HMDB0015002,Serum=HMDB0015002,PubChem=445643,UNPD=UNPD112971;UNPD146335;UNPD198829;UNPD98854;UNPD224472	ChEBI=CHEBI:61057		C44H69NO12	C44H69NO12		8.5034	7.67
Negative	807.502	2.03	240.99527:142 253.31345:76 255.29475:372 389.26929:66 391.02856:293 551.30896:172 552.44495:78 553.43787:699 571.56323:170 719.62335:90 720.34052:203	[M-H]-			0.022765	0.36589	Phospholipid	Phosphatidylinositols	Phosphatidylinositols	Phosphatidylinositols	PI(16:0/16:1(9Z))	PI(16:1(9Z)/16:0)	PI(15:0/17:1(9Z))	HMDB=HMDB0009779,ChEBI=CHEBI:88396,YMDB=YMDB01235,BMDB=BMDB09779,LipidMAPS=LMGP06010881,Serum=HMDB0009779	HMDB=HMDB0009797,ChEBI=CHEBI:88425,FooDB=FDB026987,BMDB=BMDB09797,LipidMAPS=LMGP06010175,Serum=HMDB0009797	LipidMAPS=LMGP06010111	C41H77O13P	C41H77O13P	C41H77O13P	8.4322	8.4223	7.5919
Negative	828.5	2.14	303.18015:53 437.34131:164 439.37103:236 741.41412:1439	[M-H]-			0.28613	0.29294	No annotation
Negative	833.519	3.29	240.9823:170 253.36234:77 279.32977:70 281.40149:135 297.06534:115 389.46375:77 391.37341:115 417.31525:151 551.36957:87 553.42194:193 569.36163:60 571.39496:71 579.3006:205 597.47662:72	[M-H]-			0.065715	0.82655	Phospholipid	Phosphatidylinositols	Phosphatidylinositols	Phosphatidylinositols	PI(16:0/18:2(9Z,12Z))	PI(18:2(9Z,12Z)/16:0)	PI(18:1(9Z)/16:1(9Z))	HMDB=HMDB0009784;HMDB0062653,ChEBI=CHEBI:72838;CHEBI:73212,FooDB=FDB026974,BMDB=BMDB09784,LipidMAPS=LMGP06010959,Serum=HMDB0009784	HMDB=HMDB0009846,ChEBI=CHEBI:88640,FooDB=FDB027036,BMDB=BMDB09846,LipidMAPS=LMGP06010847,Serum=HMDB0009846	HMDB=HMDB0009835,ChEBI=CHEBI:88626,BMDB=BMDB09835,LipidMAPS=LMGP06010851,Serum=HMDB0009835	C43H79O13P	C43H79O13P	C43H79O13P	8.076	8.076	8.0067
Negative	835.533	3.31	241.12003:76 255.18918:64 281.3125:131 283.39926:172 297.24954:92 391.07983:141 417.37567:115 419.25867:163 553.38739:198 571.35223:52 579.5097:100 580.76074:111 581.4649:126 599.59534:76	[M-H]-			0.0888	0.76357	Phospholipid	Phosphatidylinositols	Phosphatidylinositols	Phosphatidylinositols	PI(18:1(9Z)/16:0)	PI(16:0/18:1(9Z))	PI(18:0/16:1(9Z))	HMDB=HMDB0009834,ChEBI=CHEBI:88625,BMDB=BMDB09834,LipidMAPS=LMGP06010933,Serum=HMDB0009834	HMDB=HMDB0009783,ChEBI=CHEBI:72837;CHEBI:73215,DrugBank=DB02144,SMPDB=PW_C005831,YMDB=YMDB01236,BMDB=BMDB09783,LipidMAPS=LMGP06010001,Serum=HMDB0009783	HMDB=HMDB0009806,ChEBI=CHEBI:88557,YMDB=YMDB01241,BMDB=BMDB09806,LipidMAPS=LMGP06010857,Serum=HMDB0009806	C43H81O13P	C43H81O13P	C43H81O13P	8.1696	8.1691	8.1488
Negative	842.515	2.1	417.15466:56 669.49713:311 670.38855:104 713.56952:177 714.63959:98 728.54535:113	[M-H]-			0.029967	0.62501	No annotation
Negative	844.53	2.19	253.37585:52 644.56903:68 645.67468:148 671.3681:541 672.5177:238 715.45776:400 716.49512:171 730.3111:317 730.99164:59 770.64044:64	[M-H]-			0.036192	0.6027	No annotation
Negative	859.543	2.03	279.33557:124 281.26791:342 283.47125:51 297.09314:73 392.54779:58 415.14197:70 417.15771:316 554.28644:61 577.36713:91 579.20258:624 581.41284:68 597.50378:134	[M-H]-			0.05805	0.64242	Phospholipid	Phosphatidylinositols	Phosphatidylinositols	Phosphatidylinositols	PI(18:0/18:3(9Z,12Z,15Z))	PI(18:0/18:3(6Z,9Z,12Z))	PI(18:2(9Z,12Z)/18:1(9Z))	HMDB=HMDB0009811,ChEBI=CHEBI:88579,FooDB=FDB027001,BMDB=BMDB09811,LipidMAPS=LMGP06010284,Serum=HMDB0009811	HMDB=HMDB0009810,ChEBI=CHEBI:88577,BMDB=BMDB09810,LipidMAPS=LMGP06010283,Serum=HMDB0009810	HMDB=HMDB0009849,ChEBI=CHEBI:88633,FooDB=FDB027039,BMDB=BMDB09849,LipidMAPS=LMGP06010318,Serum=HMDB0009849	C45H81O13P	C45H81O13P	C45H81O13P	7.1417	7.1417	7.0866
Negative	861.548	3.29	241.15257:50 281.3764:360 283.20822:77 417.21002:581 419.24725:110 577.47461:59 579.48083:535 581.42426:167 597.2547:108 599.54736:55	[M-H]-			0.058058	0.99678	Phospholipid	Phosphatidylinositols	Phosphatidylinositols	Phosphatidylinositols	PI(18:2(9Z,12Z)/18:0)	PI(18:0/18:2(9Z,12Z))	PI(16:0/20:2(11Z,14Z))	HMDB=HMDB0009847,ChEBI=CHEBI:88641,FooDB=FDB027037,BMDB=BMDB09847,LipidMAPS=LMGP06010846,Serum=HMDB0009847	HMDB=HMDB0009809,ChEBI=CHEBI:77158;CHEBI:77343,FooDB=FDB026999,BMDB=BMDB09809,LipidMAPS=LMGP06010956,Serum=HMDB0009809	HMDB=HMDB0009786,ChEBI=CHEBI:88387,FooDB=FDB026976,BMDB=BMDB09786,LipidMAPS=LMGP06010165,Serum=HMDB0009786	C45H83O13P	C45H83O13P	C45H83O13P	8.2415	8.2415	8.1659
Negative	861.553	2.05	279.27298:84 281.34372:528 283.32724:87 296.89902:55 417.37048:354 419.35571:98 579.29089:572 581.39288:171 599.45276:67	[M-H]-			0.68652	-0.084998	Phospholipid	Phosphatidylinositols	Phosphatidylinositols	Phosphatidylinositols	PI(18:2(9Z,12Z)/18:0)	PI(18:0/18:2(9Z,12Z))	PI(20:2(11Z,14Z)/16:0)	HMDB=HMDB0009847,ChEBI=CHEBI:88641,FooDB=FDB027037,BMDB=BMDB09847,LipidMAPS=LMGP06010846,Serum=HMDB0009847	HMDB=HMDB0009809,ChEBI=CHEBI:77158;CHEBI:77343,FooDB=FDB026999,BMDB=BMDB09809,LipidMAPS=LMGP06010956,Serum=HMDB0009809	HMDB=HMDB0009875,ChEBI=CHEBI:89150,FooDB=FDB027065,BMDB=BMDB09875,LipidMAPS=LMGP06010532,Serum=HMDB0009875	C45H83O13P	C45H83O13P	C45H83O13P	8.0597	8.0597	7.9922
Negative	870.546	2.18	697.47363:282 698.44086:161 741.57166:178 742.50159:69 756.49384:94	[M-H]-			0.07415	0.53428	No annotation
Positive	878.575	3.44	285.98459:94 304.16824:147 575.45782:1496 716.10028:71 793.88324:291 794.49658:1940 824.28217:77 842.35834:1111 860.32159:3540	[M+H]+			0.14833	2.2109	Phospholipid	Phosphatidylcholines			PC(22:6(4Z,7Z,10Z,13Z,16Z,19Z)/22:6(4Z,7Z,10Z,13Z,16Z,19Z))			HMDB=HMDB0008748,FooDB=FDB025938,STOFF=STOFF_6650,BMDB=BMDB08748,LipidMAPS=LMGP01011119			C52H80NO8P			6.3085
Negative	883.533	3.28	281.29892:281 283.41153:58 296.9563:80 417.2608:185 438.87134:64 579.42755:393 581.36566:133 601.50305:131	[M-H]-	yes	yes	0.042608	1.6587	Phospholipid	Phosphatidylinositols	Phosphatidylinositols	Phosphatidylinositols	PI(18:1(9Z)/20:4(5Z,8Z,11Z,14Z))	PI(20:4(5Z,8Z,11Z,14Z)/18:1(9Z))	PI(20:3(8Z,11Z,14Z)/18:2(9Z,12Z))	HMDB=HMDB0009844;HMDB0062586,ChEBI=CHEBI:78765;CHEBI:82762,FooDB=FDB027034,BMDB=BMDB09844,LipidMAPS=LMGP06010849,Serum=HMDB0009844	HMDB=HMDB0009896,ChEBI=CHEBI:89126,FooDB=FDB027086,BMDB=BMDB09896,LipidMAPS=LMGP06010599,Serum=HMDB0009896	HMDB=HMDB0009890,ChEBI=CHEBI:89117,FooDB=FDB027080,BMDB=BMDB09890,LipidMAPS=LMGP06010570,Serum=HMDB0009890	C47H81O13P	C47H81O13P	C47H81O13P	7.4422	7.4422	7.3688
Negative	896.561	2.22	723.55273:77 782.43365:101	[M-H]-			0.063613	0.85863	No annotation
Positive	906.26	12.92	265.17987:96 267.09921:154 281.13449:344 325.09564:516 341.03336:1119 355.04944:1185 358.47882:417 415.0058:52 428.90118:2479 503.02039:145 888.40997:121 889.026:62	[M+H]+			0.066512	-1.3642	No annotation
Positive	980.279	13.54	281.08072:1465 298.69159:175 325.17725:577 326.99847:285 341.00897:1269 344.76611:92 355.13574:968 358.70135:342 415.07129:281 429.03632:2457 502.40228:188 503.06439:1361 961.78247:92 962.62793:218	[M+H]+			0.11831	-0.66736	No annotation
Positive	1054.3	14.34	325.02567:205 327.0621:187 341.09576:357 344.93597:55 355.02679:2080 358.54733:169 415.0816:191 429.01514:1384 502.87817:617 576.54492:64 1035.95667:210 1036.67969:206	[M+H]+			0.66787	-0.50122	No annotation
Negative	1395.94	10.86	1395.64563:761	[M-H]-			0.09655	5.3429	No annotation
Negative	1399.97	11.34	688.50836:60 1399.34436:277 1399.99695:1234	[M-H]-			0.051766	4.197	No annotation
Positive	1448.07	2.13	1447.76318:129	[M+H]+			0.079104	1.0294	No annotation
Negative	1452.01	11.45	1451.70032:886	[M-H]-			0.10422	3.0219	Phospholipid	Cardiolipins	Cardiolipins	Cardiolipins	CL(18:1(9Z)/18:1(9Z)/20:4(5Z,8Z,11Z,14Z)/16:0)	CL(18:1(9Z)/16:0/20:4(5Z,8Z,11Z,14Z)/18:1(9Z))	CL(18:1(9Z)/16:0/18:1(9Z)/20:4(5Z,8Z,11Z,14Z))	HMDB=HMDB0058485;HMDB0111902,LipidMAPS=LMGP12010541;LMGP12011101	HMDB=HMDB0058337;HMDB0111971,LipidMAPS=LMGP12010471;LMGP12011171	HMDB=HMDB0058327;HMDB0111807,LipidMAPS=LMGP12010456;LMGP12010631	C81H146O17P2	C81H146O17P2	C81H146O17P2	4.1863	4.1863	4.1863
Negative	1456.04	11.9	1455.73669:682	[M-H]-			0.07415	3.4777	No annotation
Positive	1464.1	2.18	730.55981:151 731.50464:155 732.58221:64 733.565:158 1463.01001:791 1463.68994:14933	[M+H]+			0.1155	3.163	Phospholipid	Cardiolipins	Cardiolipins	Cardiolipins	CL(18:0/18:0/18:1(9Z)/18:0)	CL(18:0/18:0/18:0/18:1(9Z))	CL(1'-[16:0/18:1(9Z)],3'-[18:0/20:0])	HMDB=HMDB0056990,LipidMAPS=LMGP12010272;LMGP12010482	HMDB=HMDB0056963,LipidMAPS=LMGP12010267;LMGP12010302	LipidMAPS=LMGP12010089;LMGP12010369	C81H156O17P2	C81H156O17P2	C81H156O17P2	4.1233	4.1233	3.7067
Positive	1488.1	2.14	733.91833:79 758.03473:58 1487.21765:1824 1487.823:18504	[M+H]+			0.058011	2.8701	No annotation
Negative	1504.03	11.61	1503.88538:807	[M-H]-			0.061409	7.3189	No annotation
Negative	1508.07	12.01	1507.74109:443	[M-H]-			0.12862	4.5816	Phospholipid	Cardiolipins	Cardiolipins	Cardiolipins	CL(18:0/18:1(9Z)/22:5(7Z,10Z,13Z,16Z,19Z)/18:0)	CL(18:0/18:1(11Z)/18:0/22:5(7Z,10Z,13Z,16Z,19Z))	CL(18:0/18:0/18:1(11Z)/22:5(4Z,7Z,10Z,13Z,16Z))	HMDB=HMDB0057188	HMDB=HMDB0057097	HMDB=HMDB0056986	C85H154O17P2	C85H154O17P2	C85H154O17P2	3.9807	3.9807	3.9807
Positive	1542.15	2.17	759.59119:63 760.54816:83 761.48627:71 781.71185:72 782.50525:112 880.2901:63 1381.7522:53 1541.05615:2902 1541.87317:10691	[M+H]+		YES	0.035704	6.8801	No annotation
Positive	1544.16	2.21	758.79456:152 759.76373:59 760.45111:61 782.50385:74 783.54724:51 784.5163:87 785.46069:80 1543.06873:2318 1543.89148:10957	[M+H]+			0.0888	4.9978	No annotation
