# Supplementary material for: Dengue virus reduces AGPAT1 expression to alter phospholipids and enhance infection in Aedes aegypti
Source: PLoS Pathog. 2019 Dec 9;15(12):e1008199. doi: 10.1371/journal.ppat.1008199 (PMC6922471; doi:10.1371/journal.ppat.1008199)
Supplement: S10 Table — The table contains compound detected on cell with the following information: ionization mode (positive and negative), the mass average m/z between replicate, the retention time average Rt in minutes between replicates, the MS/MS spectrum fragmentation and intensity, adducts [M+H]+ and [M-H]-, metabolites of importance in Fig 4F, regulated compound in dsAGPAT1 condition only, regulated compound with abundance between DENV-infected and Mock samples in dsControl or dsAGPAT1 condition (p-value < 0.05, |log2 fold change| ≥ 1) and annotation classes with the first 3 ranks of identification by MS-Finder. (XLSX) [file ppat.1008199.s021.xlsx]

## Sheet: Table S10
METABOLOMIC ANALYSIS OF DENV-INFECTED OR UNINFECTED MOSQUITO AFTER AGPAT1 DEPLETION
								Red shows significantly regulated metabolite abundance between DENV and Mock samples (p-value < 0.05, log2 fold change ≥ 1 or ≤ -1)
								DENV vs Mock dsControl		DENV vs Mock dsAGPAT1		Annotation
Ionization mode	Average Mz	Average Rt(min)	MS/MS spectrum	Adduct ion name	Metabolites in Fig 4F	Regulated compound by dsAGPAT1 only	Regulated compound by Infection (both dsControl and dsAGPAT1)	p-value	Log2 (FC)	p-value	Log2 (FC)	Classes	Ontology 1	Ontology 2	Ontology 3	Structure rank 1	Structure rank 2	Structure rank 3	Databases 1	Databases 2	Databases 3	Formula 1	Formula 2	Formula 3	Total score 1	Total score 2	Total score 3
Positive	110.005	0.76	82.04593:75 83.03559:138 89.27086:114 92.99242:168 98.3546:1456 100.00182:59	[M+H]+			yes	0.002026	-4.4164	0.0067179	-9.0657	Other	Thiohemiaminal derivatives			iminodimethanethiol			ChEBI=CHEBI:32670;CHEBI:32671			C2H7NS2			5.1417
Positive	116.067	0.89	81.14384:125 88.10451:453	[M+H]+			yes	0.0026036	-4.0596	0.0016349	-3.4086	Amino acid	Proline and derivatives	Alpha amino acids	Gamma amino acids and derivatives	L-Proline	(+)-(1S,2S)-norcoronamic acid	4-Amino-2-methylenebutanoic acid	HMDB=HMDB0000162;HMDB0003411,KNApSAcK=C00001388,ChEBI=CHEBI:16313;CHEBI:17203;CHEBI:60039;CHEBI:26271;CHEBI:32862;CHEBI:32864;CHEBI:32867;CHEBI:32868;CHEBI:32871;CHEBI:32872;CHEBI:57726,DrugBank=DB00172;DB02853,SMPDB=PW_C000106;PW_C001878,YMDB=YMDB00378;YMDB00903,T3DB=T3D4411,FooDB=FDB000570;FDB023166;FDB030009,BMDB=BMDB00162;BMDB03411,Urine=HMDB0000162;HMDB0003411,Saliva=HMDB0000162,Feces=HMDB00…	ChEBI=CHEBI:87174	HMDB=HMDB0030409,FooDB=FDB002271,UNPD=UNPD121459	C5H9NO2	C5H9NO2	C5H9NO2	7.4224	7.2378	7.0797
Negative	119.035	17.54	57.97608:126 59.66217:34291 60.29213:217	[M-H]-			yes	0.0026827	-10.787	4.2336e-05	-11.334	Organic acid	Beta hydroxy acids and derivatives	Beta hydroxy acids and derivatives	Sugar acids and derivatives	A,b-Dihydroxyisobutyric acid	(S)-3,4-Dihydroxybutyric acid	4-Deoxyerythronic acid	HMDB=HMDB0002601,ChEBI=CHEBI:19315;CHEBI:36532,FooDB=FDB023033,BMDB=BMDB02601,LipidMAPS=LMFA01050400,Urine=HMDB0002601,Serum=HMDB0002601	HMDB=HMDB0000337,ChEBI=CHEBI:86371,FooDB=FDB021961,BMDB=BMDB00337,LipidMAPS=LMFA01050378;LMFA01050461,Urine=HMDB0000337,Feces=HMDB0000337,CSF=HMDB0000337,Serum=HMDB0000337,UNPD=UNPD130472	HMDB=HMDB0000498;HMDB0002453,ChEBI=CHEBI:86347;CHEBI:86391,FooDB=FDB022077;FDB023007,BMDB=BMDB00498;BMDB02453,LipidMAPS=LMFA01050397,Urine=HMDB0000498;HMDB0002453,Serum=HMDB0000498;HMDB0002453	C4H8O4	C4H8O4	C4H8O4	5.53	5.53	5.53
Negative	128.96	17.84	111.49272:60	[M-H]-			yes	0.00095506	-5.4976	1.5934e-05	-9.0235	Other	Dithioacetals			methylene bis(thiocyanate)			ChEBI=CHEBI:134614,T3DB=T3D1676,STOFF=STOFF_2361			C3H2N2S2			4.2127
Negative	131.082	18.67	113.35391:119	[M-H]-				0.12487	-1.2903	0.37511	-1.2782	Amino acid	L-alpha-amino acids	Phenylpropenes	Organic N-nitroso compounds	Ornithine	p-Mentha-1,3,5,8-tetraene	1-methoxy-N-nitrosodiethylamine	HMDB=HMDB0000214;HMDB0003374,KNApSAcK=C00001384,ChEBI=CHEBI:15729;CHEBI:16176;CHEBI:18257;CHEBI:32964;CHEBI:44667;CHEBI:46911;CHEBI:46912;CHEBI:46913;CHEBI:46914;CHEBI:57668,DrugBank=DB00129,SMPDB=PW_C000140;PW_C001864,YMDB=YMDB00353,T3DB=T3D4329,FooDB=FDB003654;FDB009998;FDB023157;FDB030969,BMDB=BMDB00214;BMDB03374,LipidMAPS=LMFA01100057,Urine=HMDB0000214,Saliva=HMDB0000214;HMDB0003374,Feces=HMD…	HMDB=HMDB0029641,KNApSAcK=C00010905,ChEBI=CHEBI:89920,FooDB=FDB000812;FDB003828;FDB003835;FDB003847,NANPDB=NANPDB_4193;NANPDB_4926,Urine=HMDB0029641,Saliva=HMDB0029641,Feces=HMDB0029641,UNPD=UNPD58654	ChEBI=CHEBI:25234	C5H12N2O2	C10H12	C5H12N2O2	5.675	4.9143	4.8417
Positive	136.061	3.58	119.10364:62	[M+H]+			yes	0.0059327	9.5415	0.0014548	10.475	Amino acid	6-aminopurines	L-alpha-amino acids	Purines and purine derivatives	Adenine	(+)-threo-2-Amino-3,4-dihydroxybutanoic acid	2-aminopurine	HMDB=HMDB0000034,KNApSAcK=C00001490,ChEBI=CHEBI:16708,DrugBank=DB00173,SMPDB=PW_C000024,YMDB=YMDB00887,T3DB=T3D4279,STOFF=STOFF_617,BMDB=BMDB00034,Urine=HMDB0000034,Saliva=HMDB0000034,Feces=HMDB0000034,ECMDB=ECMDB00034,CSF=HMDB0000034,Serum=HMDB0000034,PubChem=190,PlantCyc=ADENINE,UNPD=UNPD128555	HMDB=HMDB0029389,ChEBI=CHEBI:28330;CHEBI:60904,YMDB=YMDB00494,FooDB=FDB000470,LipidMAPS=LMFA01050439,ECMDB=ECMDB20092,PubChem=193577,UNPD=UNPD11941;UNPD175547;UNPD39325;UNPD66928	ChEBI=CHEBI:479072	C5H5N5	C4H9NO4	C5H5N5	9.1918	8.9117	8.775
Positive	136.076	11.36	108.06831:65 109.14125:134 118.99922:13946	[M+H]+			yes	3.413e-06	9.0729	0.0014883	10.235	Other	Phenoxy compounds	Alkyl-phenylketones	Phenylacetamides	phenyl acetimidate	2'-Aminoacetophenone	2-Phenylacetamide	ChEBI=CHEBI:52478	HMDB=HMDB0032630,ChEBI=CHEBI:91110,FooDB=FDB010574,UNPD=UNPD44850	HMDB=HMDB0010715,ChEBI=CHEBI:16562,FooDB=FDB027865,BMDB=BMDB10715,PubChem=7680,PlantCyc=CPD-238,UNPD=UNPD169146	C8H9NO	C8H9NO	C8H9NO	8.8089	8.5199	8.4537
Positive	139.983	13.37	98.92992:1575 116.88422:288 139.87889:51	[M+H]+			yes	0.0010106	-5.5611	0.00040856	-6.5785	No annotation
Negative	141.017	7.83	57.78671:102 59.67701:16857	[M-H]-	yes	yes	yes	0.37632	-1.1356	0.0046191	-3.1481	Fatty acid	Medium-chain fatty acids	Pyranones and derivatives	Furoic acids	trans-trans-Muconic acid	Kojic acid	Sumiki's acid	HMDB=HMDB0002349;HMDB0006331;HMDB0062661;HMDB0062704,ChEBI=CHEBI:16508;CHEBI:27671;CHEBI:32379;CHEBI:38407;CHEBI:27031;CHEBI:27035;CHEBI:27036;CHEBI:36157;CHEBI:36501;CHEBI:36502;CHEBI:36504,FooDB=FDB022974;FDB023893,BMDB=BMDB02349;BMDB06331,LipidMAPS=LMFA01170077;LMFA01170124,Urine=HMDB0002349,Feces=HMDB0002349,Serum=HMDB0002349,PubChem=7310978;5280518,UNPD=UNPD7335;UNPD81447;UNPD96391;UNPD226577	HMDB=HMDB0032923,KNApSAcK=C00041026,ChEBI=CHEBI:43572,DrugBank=DB01759,T3DB=T3D3769,FooDB=FDB010906,UNPD=UNPD92166	HMDB=HMDB0002432;HMDB0029188,ChEBI=CHEBI:89118,FooDB=FDB023004,NANPDB=NANPDB_1262,BMDB=BMDB02432,Urine=HMDB0002432,Feces=HMDB0002432,Serum=HMDB0002432,UNPD=UNPD61195	C6H6O4	C6H6O4	C6H6O4	4.532	4.1153	4.1153
Positive	141.954	13.54	60.02695:260 100.62735:159 114.00201:451 129.82785:169 131.81859:55 141.9183:66	[M+H]+			yes	3.1713e-06	-8.5649	1.0008e-05	-8.7917	No annotation
Negative	142.975	17.95	59.11317:198 59.86167:677	[M-H]-			yes	0.0012265	-4.6039	4.0346e-05	-3.7909	No annotation
Negative	144.919	13.36	115.93852:123	[M-H]-			yes	0.0010292	-11.049	3.6437e-05	-11.492	No annotation
Negative	145.046	1.44	57.11674:64 83.11281:134 126.9059:1474	[M-H]-			yes	7.1136e-05	-9.0422	0.0014498	-10.224	Other	Short-chain keto acids and derivatives	Methyl-branched fatty acids	Methyl-branched fatty acids	(S)-2-Aceto-2-hydroxybutanoic acid	Methylglutaric acid	2-Methylglutaric acid	HMDB=HMDB0006900,ChEBI=CHEBI:27681;CHEBI:982;CHEBI:49256,YMDB=YMDB00039;YMDB00428,FooDB=FDB024147;FDB030318,BMDB=BMDB06900,LipidMAPS=LMFA01050383;LMFA01050501,ECMDB=ECMDB04001;ECMDB06900,PubChem=21145135;13999771;440875;21,PlantCyc=2-ACETO-2-HYDROXY-BUTYRATE	HMDB=HMDB0000752,ChEBI=CHEBI:68566,FooDB=FDB022224,BMDB=BMDB00752,LipidMAPS=LMFA01170117,Urine=HMDB0000752,Feces=HMDB0000752,Serum=HMDB0000752,UNPD=UNPD7631	HMDB=HMDB0000422,ChEBI=CHEBI:68567;CHEBI:84980,YMDB=YMDB01573,FooDB=FDB007246;FDB022036,STOFF=STOFF_9690,BMDB=BMDB00422,LipidMAPS=LMFA01170084,Urine=HMDB0000422,Serum=HMDB0000422	C6H10O4	C6H10O4	C6H10O4	9.3891	9.3863	9.3484
Positive	145.049	12.58	55.03048:62 69.10086:487 71.02264:78 73.07133:359 84.974:2398 103.97891:253 109.00533:250 114.98094:116 116.99635:58 126.90865:10754	[M+H]+			yes	9.6683e-05	11.123	0.00019417	11.034	Fatty acid	Medium-chain fatty acids	Methyl-branched fatty acids	Medium-chain fatty acids	trans-2-Hexenedioic acid	3-Methylglutaconic acid	3-Hexenedioic acid	HMDB=HMDB0013311,ChEBI=CHEBI:36192;CHEBI:49296,FooDB=FDB029375,LipidMAPS=LMFA01170070,Urine=HMDB0013311,UNPD=UNPD169139	HMDB=HMDB0000522,ChEBI=CHEBI:37245,T3DB=T3D4265,FooDB=FDB022090,BMDB=BMDB00522,LipidMAPS=LMFA01170068,Urine=HMDB0000522,CSF=HMDB0000522,UNPD=UNPD145288;UNPD43669	HMDB=HMDB0000393,ChEBI=CHEBI:86952;CHEBI:87166,FooDB=FDB022011,BMDB=BMDB00393,LipidMAPS=LMFA01170087	C6H8O4	C6H8O4	C6H8O4	9.4888	9.4547	9.3036
Negative	145.062	19.56	109.55267:203 127.3143:1755 128.36018:418	[M-H]-			yes	0.0041318	-5.6204	0.0004827	-8.4353	Peptide	Dipeptides	Ureas	Alpha amino acids	Alanylglycine	Ureidoisobutyric acid	L-Glutamine	HMDB=HMDB0006899,ChEBI=CHEBI:73757;CHEBI:73786;CHEBI:73836,FooDB=FDB006400;FDB024146,BMDB=BMDB06899,PlantCyc=ALA-GLY,UNPD=UNPD81020	HMDB=HMDB0002031,ChEBI=CHEBI:1670;CHEBI:74414,SMPDB=PW_C001363,FooDB=FDB022808;FDB030465,BMDB=BMDB02031,Urine=HMDB0002031,ECMDB=ECMDB02031,CSF=HMDB0002031,Serum=HMDB0002031,PubChem=91820371;55289370;21123869;160663,PlantCyc=3-UREIDO-ISOBUTYRATE	HMDB=HMDB0000641;HMDB0003423,KNApSAcK=C00001359,ChEBI=CHEBI:17061;CHEBI:18050;CHEBI:28300;CHEBI:32665;CHEBI:32666;CHEBI:32672;CHEBI:32673;CHEBI:32678;CHEBI:32679;CHEBI:58000;CHEBI:58359,DrugBank=DB00130;DB02174,SMPDB=PW_C000500,YMDB=YMDB00002;YMDB00990,T3DB=T3D4319,FooDB=FDB012164;FDB023171;FDB030965,STOFF=STOFF_8696,BMDB=BMDB00641;BMDB03423,Urine=HMDB0000641,Saliva=HMDB0000641;HMDB0003423,Feces=…	C5H10N2O3	C5H10N2O3	C5H10N2O3	5.2343	5.2343	5.2343
Negative	146.046	19.62	128.3618:4587	[M-H]-			yes	0.0027632	-9.7269	0.00033497	-5.3082	Amino acid	Aspartic acid and derivatives	N-acyl-L-alpha-amino acids	L-alpha-amino acids	N-Methyl-D-aspartic acid	N-Acetylserine	O-Acetylserine	HMDB=HMDB0002393,ChEBI=CHEBI:31882,FooDB=FDB022992,BMDB=BMDB02393,PubChem=22880,UNPD=UNPD133883;UNPD42466	HMDB=HMDB0002931,ChEBI=CHEBI:45441,DrugBank=DB02340,YMDB=YMDB00810,FooDB=FDB000970,BMDB=BMDB02931,Urine=HMDB0002931,Saliva=HMDB0002931,UNPD=UNPD174395	HMDB=HMDB0003011,KNApSAcK=C00007459,ChEBI=CHEBI:17981;CHEBI:58340,DrugBank=DB01837,YMDB=YMDB00652,FooDB=FDB004955;FDB023094;FDB031064,BMDB=BMDB03011,Urine=HMDB0003011,ECMDB=ECMDB03011,Serum=HMDB0003011,PubChem=25245438;6971051;99478,PlantCyc=ACETYLSERINE	C5H9NO4	C5H9NO4	C5H9NO4	5.2553	5.2553	5.2553
Positive	148.06	14.23	56.20477:61 84.01038:6602 85.08241:206 106.23874:51 107.05211:75 117.19052:55 129.98268:59404 131.11798:621	[M+H]+			yes	7.0104e-05	10.706	0.010149	9.1242	Amino acid	L-alpha-amino acids	Glutamic acid and derivatives	Aspartic acid and derivatives	L-4-Hydroxyglutamate semialdehyde	L-Glutamic acid	N-Methyl-D-aspartic acid	HMDB=HMDB0006556,ChEBI=CHEBI:27809;CHEBI:62637,SMPDB=PW_C002808,YMDB=YMDB00720,FooDB=FDB023970,BMDB=BMDB06556,ECMDB=ECMDB06556,PubChem=25201126;440851	HMDB=HMDB0000148;HMDB0003339;HMDB0060475,KNApSAcK=C00001358;C00019577,ChEBI=CHEBI:15966;CHEBI:16015;CHEBI:18237;CHEBI:29985;CHEBI:29986;CHEBI:14321;CHEBI:29987;CHEBI:29988;CHEBI:29989;CHEBI:76051,DrugBank=DB00142;DB02517,SMPDB=PW_C000095;PW_C001849,YMDB=YMDB00271,T3DB=T3D4296,FooDB=FDB012534;FDB012535;FDB012536;FDB020170;FDB020321;FDB020322;FDB023148;FDB030962,STOFF=STOFF_297,BMDB=BMDB00148;BMDB0…	HMDB=HMDB0002393,ChEBI=CHEBI:31882,FooDB=FDB022992,BMDB=BMDB02393,PubChem=22880,UNPD=UNPD133883;UNPD42466	C5H9NO4	C5H9NO4	C5H9NO4	8.6916	8.6817	8.6056
Positive	151.03	0.76	89.03445:252 109.97411:13679 123.03236:64 127.80643:8842 133.00371:306 145.81471:605 150.82637:207	[M+H]+			yes	0.0016701	-6.6351	0.0069567	-5.1327	Other	Benzodioxoles	Medium-chain fatty acids	Benzoyl derivatives	3,4-Methylenedioxybenzaldehyde	(E)-8-Hydroxy-2-octene-4,6-diynoic acid	Phenylglyoxylic acid	HMDB=HMDB0032612,KNApSAcK=C00002666,ChEBI=CHEBI:8240,YMDB=YMDB01776,FooDB=FDB010553,STOFF=STOFF_2239,UNPD=UNPD64754	HMDB=HMDB0031515,FooDB=FDB008109,UNPD=UNPD135107	HMDB=HMDB0001587,ChEBI=CHEBI:18280;CHEBI:36656,DrugBank=DB02279,FooDB=FDB022696,BMDB=BMDB01587,Urine=HMDB0001587,PubChem=1548898;11915,UNPD=UNPD77764	C8H6O3	C8H6O3	C8H6O3	6.4964	6.2725	6.1154
Negative	151.061	15.43	59.70607:2758	[M-H]-			yes	0.0049192	-5.3668	0.00014419	-9.0798	Carbohydrate	Sugar alcohols	Sugar alcohols		L-2-(Hydroxymethyl)-1,2,3,4-butanetetrol	Ribitol		HMDB=HMDB0033730,KNApSAcK=C00036346,ChEBI=CHEBI:17702;CHEBI:48307;CHEBI:48310,FooDB=FDB011853,UNPD=UNPD59887	HMDB=HMDB0000508;HMDB0000568;HMDB0001851;HMDB0002917,KNApSAcK=C00001156;C00001171,ChEBI=CHEBI:15963;CHEBI:17151;CHEBI:18333;CHEBI:18403,DrugBank=DB01904,YMDB=YMDB00591;YMDB00778,FooDB=FDB001134;FDB001475;FDB022083;FDB022709;FDB030801,STOFF=STOFF_1057,BMDB=BMDB00508;BMDB00568;BMDB01851,Urine=HMDB0000508;HMDB0000568;HMDB0001851;HMDB0002917,Saliva=HMDB0001851;HMDB0002917,Feces=HMDB0000508;HMDB000185…		C5H12O5	C5H12O5		5.2103	5.2103
Negative	152.978	16.4	57.06191:67 59.06155:561 61.113:59 112.96498:3900	[M-H]-			yes	0.00046238	12.792	1.5012e-06	11.645	Other	Sulfenyl compounds	Organosulfonic acids	Organosulfonic acids	(E)-S-1-Propenyl thiosulfate	3-sulfopropanoic acid	3-sulfolactaldehyde(1-)	HMDB=HMDB0041079,FooDB=FDB020954;FDB020955,UNPD=UNPD123044;UNPD30620	ChEBI=CHEBI:74031,PubChem=45479302	ChEBI=CHEBI:77135;CHEBI:77265;CHEBI:88099;CHEBI:90104;CHEBI:90109;CHEBI:90264,PubChem=86289123	C3H6O3S2	C3H6O5S	C3H6O5S	6.4697	6.1042	6.0731
Negative	154.974	16.97	59.03512:3539 60.93678:4724 69.10498:84 112.92746:12735 115.13557:72	[M-H]-			yes	0.0018125	14.412	0.0053227	14.051	No annotation
Positive	154.985	13.52	113.95973:5398 131.81712:412 154.87492:66	[M+H]+			yes	8.9348e-05	-8.9503	1.5604e-05	-9.1466	Other	Sulfenyl compounds			(E)-S-1-Propenyl thiosulfate			HMDB=HMDB0041079,FooDB=FDB020954;FDB020955,UNPD=UNPD123044;UNPD30620			C3H6O3S2			5.8837
Positive	156.072	0.82	83.02606:387 93.07333:116 95.0392:2529 138.0004:480	[M+H]+			yes	0.00057151	-6.7767	0.00021474	-11.121	Amino acid	L-alpha-amino acids	Histidine and derivatives	Histidine and derivatives	L-2-Amino-3-(1-pyrazolyl)propanoic acid	L-Histidine	L-histidinate(2-)	HMDB=HMDB0034267,KNApSAcK=C00001390,ChEBI=CHEBI:16357;CHEBI:57747,FooDB=FDB012598,PubChem=25203312,PlantCyc=CPD-670,UNPD=UNPD166609	HMDB=HMDB0000177,KNApSAcK=C00001363,ChEBI=CHEBI:15971;CHEBI:27570;CHEBI:27947;CHEBI:32510;CHEBI:32512;CHEBI:32513;CHEBI:32523;CHEBI:32526;CHEBI:32527;CHEBI:32529;CHEBI:32531;CHEBI:32532;CHEBI:57595,DrugBank=DB00117,SMPDB=PW_C000116,YMDB=YMDB00369;YMDB00794,T3DB=T3D4363,FooDB=FDB011856,STOFF=STOFF_3295;STOFF_8623,BMDB=BMDB00177,Urine=HMDB0000177,Saliva=HMDB0000177,Feces=HMDB0000177,ECMDB=ECMDB0017…	ChEBI=CHEBI:32511;CHEBI:32524;CHEBI:32530	C6H9N3O2	C6H9N3O2	C6H9N3O2	8.8603	8.8364	8.4197
Negative	156.991	13.84	59.63546:1975	[M-H]-			yes	0.0021294	-8.9478	1.2794e-05	-9.4939	Benzenoid	Benzenesulfonic acids and derivatives			benzenesulfonic acid			ChEBI=CHEBI:64455;CHEBI:64457,STOFF=STOFF_667,PubChem=91526			C6H6O3S			4.2857
Negative	157.124	5.96	59.7079:284	[M-H]-			yes	0.028567	-8.2655	0.080274	-10.208	Fatty acid	Fatty alcohol esters	Fatty acid esters	Fatty acid esters	Octyl formate	Butyl 3-methylbutanoate	Pentyl butanoate	HMDB=HMDB0038603,ChEBI=CHEBI:87496,FooDB=FDB017994,LipidMAPS=LMFA07010980,UNPD=UNPD3014	HMDB=HMDB0032042,ChEBI=CHEBI:89723,FooDB=FDB008746,LipidMAPS=LMFA07010652,Feces=HMDB0032042	HMDB=HMDB0034162,ChEBI=CHEBI:87684,FooDB=FDB012448,LipidMAPS=LMFA07010989,UNPD=UNPD113968	C9H18O2	C9H18O2	C9H18O2	5.529	5.529	5.529
Positive	157.998	13.57	72.01074:2743 79.03903:244 98.71605:63 99.97835:65 102.08536:277 106.96086:1217 116.9371:122 124.75826:109 129.94347:98 140.88173:315	[M+H]+		yes	yes	0.067661	-0.44475	0.0032335	-1.5357	Other	Organothiophosphorus compounds			cysteamine S-phosphate(2-)			ChEBI=CHEBI:74631;CHEBI:74951,PlantCyc=CPD-3721			C2H8NO3PS			6.4601
Positive	158.023	1.13	77.08305:93 102.21089:193 141.06627:199040 141.91698:63	[M+H]+			yes	0.0054147	6.2653	0.018088	4.9328	Other	Nitroaromatic compounds	Triazinones		5-nitrouracil	5-azaorotic acid		ChEBI=CHEBI:60763	ChEBI=CHEBI:30863,DrugBank=DB03209,STOFF=STOFF_8359		C4H3N3O4	C4H3N3O4		7.7391	7.5095
Positive	158.956	13.68	55.95806:127 57.05638:435 70.03403:94 71.97486:2130 73.15154:209 96.88614:6580 98.9863:386 107.85957:81 114.95128:268 116.98387:92 117.93521:502 128.93153:206 130.90842:125 135.8649:79 138.04445:242 141.0386:80	[M+H]+			yes	0.00010223	-8.531	5.3973e-05	-7.9739	No annotation
Positive	159.06	14.38	57.06242:4663 60.97472:696 70.0957:58 72.11597:1150 73.13807:166 96.83006:1259 97.57173:67 98.45947:279 99.07108:2996 117.02477:197 117.87582:94 129.04736:77 130.9817:138 135.70781:61 141.06026:424 141.98488:479	[M+H]+			yes	0.002919	-2.5113	0.00049071	-3.6225	Fatty acid	Methyl-branched fatty acids	Medium-chain keto acids and derivatives	Medium-chain fatty acids	Isopropylmaleate	Succinylacetone	hept-2-enedioic acid	HMDB=HMDB0012241,ChEBI=CHEBI:17275;CHEBI:58085,YMDB=YMDB00442,FooDB=FDB028883;FDB030340,BMDB=BMDB12241,ECMDB=ECMDB12241,PubChem=21954611;6508102;5280533,PlantCyc=CPD-9451	HMDB=HMDB0000635,ChEBI=CHEBI:87897,T3DB=T3D4471,FooDB=FDB022156,BMDB=BMDB00635,Urine=HMDB0000635,Serum=HMDB0000635,UNPD=UNPD122008	ChEBI=CHEBI:37260,LipidMAPS=LMFA01031011	C7H10O4	C7H10O4	C7H10O4	7.8812	7.6961	7.6922
Positive	162.107	0.86	58.26979:67 60.00733:8752 60.63912:78 84.94492:1672 98.13512:50 102.04851:3298 103.07349:12899 129.94354:121 143.95613:482 146.41077:73	[M+H]+			yes	0.0012904	-10.94	8.4607e-05	-11.244	Carnitine	Carnitines	Isothioureas		L-Carnitine	Dimaprit		HMDB=HMDB0000062;HMDB0062496;HMDB0062634,ChEBI=CHEBI:16347;CHEBI:17126;CHEBI:3424;CHEBI:11060;CHEBI:39547;CHEBI:51453,DrugBank=DB00583;DB02648,SMPDB=PW_C000044,YMDB=YMDB00188;YMDB00616,T3DB=T3D2832,FooDB=FDB000571;FDB000572,STOFF=STOFF_4444,BMDB=BMDB00062,Urine=HMDB0000062,Saliva=HMDB0000062,Feces=HMDB0000062,ECMDB=ECMDB00062;ECMDB01467,CSF=HMDB0000062,Serum=HMDB0000062;HMDB0062496,PubChem=272448…	ChEBI=CHEBI:81389		C7H15NO3	C6H15N3S		8.6803	7.4841
Positive	162.112	17.86	60.83705:4051 85.56844:529 102.6563:882 103.45201:4467 104.4644:171	[M+H]+			yes	0.00028389	-13.529	4.2734e-06	-12.512	Carnitine	Carnitines	Isothioureas		L-Carnitine	Dimaprit		HMDB=HMDB0000062;HMDB0062496;HMDB0062634,ChEBI=CHEBI:16347;CHEBI:17126;CHEBI:3424;CHEBI:11060;CHEBI:39547;CHEBI:51453,DrugBank=DB00583;DB02648,SMPDB=PW_C000044,YMDB=YMDB00188;YMDB00616,T3DB=T3D2832,FooDB=FDB000571;FDB000572,STOFF=STOFF_4444,BMDB=BMDB00062,Urine=HMDB0000062,Saliva=HMDB0000062,Feces=HMDB0000062,ECMDB=ECMDB00062;ECMDB01467,CSF=HMDB0000062,Serum=HMDB0000062;HMDB0062496,PubChem=272448…	ChEBI=CHEBI:81389		C7H15NO3	C6H15N3S		5.9604	4.9845
Negative	164.039	18.68	63.68788:1721 80.61885:68 100.41866:2317 101.1671:58	[M-H]-			yes	0.004255	-10.927	0.00081673	-8.0718	Amino acid	Alpha amino acids	Pyridinecarboxylic acids	Benzoic acids	Methionine sulfoxide	4-Pyridoxolactone	Formylanthranilic acid	HMDB=HMDB0002005,ChEBI=CHEBI:17016;CHEBI:49031;CHEBI:49032;CHEBI:49033;CHEBI:49034;CHEBI:49035;CHEBI:49036;CHEBI:58772;CHEBI:58773,DrugBank=DB02235;DB02467,SMPDB=PW_C001342,YMDB=YMDB00035,FooDB=FDB022789,BMDB=BMDB02005,Urine=HMDB0002005,Saliva=HMDB0002005,Feces=HMDB0002005,ECMDB=ECMDB02005;ECMDB20295,Serum=HMDB0002005,PubChem=10909908;10062737;158980;847,PlantCyc=CPD-8990,UNPD=UNPD15039	HMDB=HMDB0003454,ChEBI=CHEBI:16871,YMDB=YMDB00787,FooDB=FDB023177,BMDB=BMDB03454,PubChem=151228	HMDB=HMDB0004089,ChEBI=CHEBI:18410;CHEBI:36575,SMPDB=PW_C002057,YMDB=YMDB00811,FooDB=FDB023309,BMDB=BMDB04089,PubChem=101399,UNPD=UNPD20458	C5H11NO3S	C8H7NO3	C8H7NO3	5.1873	4.9883	4.9883
Positive	165.049	1.18	103.07367:82 124.13597:50 136.98993:74 146.9706:5912	[M+H]+			yes	0.01445	-5.3954	0.00052806	-6.3707	Other	Cinnamaldehydes	Hydroxycinnamic acids	Hydroxycinnamic acids	(2E)-3-(3,4-dihydroxyphenyl)prop-2-enal	m-Coumaric acid	4-Hydroxycinnamic acid	HMDB=HMDB0141767,KNApSAcK=C00007511,ChEBI=CHEBI:28323,PubChem=5281871;443034,UNPD=UNPD142122;UNPD71218;UNPD220386	HMDB=HMDB0001713;HMDB0062774;HMDB0125104,ChEBI=CHEBI:32357;CHEBI:47925;CHEBI:47926;CHEBI:47927;CHEBI:47928,FooDB=FDB002590;FDB002591,BMDB=BMDB01713,Urine=HMDB0001713,Feces=HMDB0001713,Serum=HMDB0001713,PubChem=54694258;637541,PlantCyc=CPD-10797,UNPD=UNPD78050;UNPD219867	HMDB=HMDB0002035;HMDB0030677;HMDB0128076,KNApSAcK=C00000152;C00000580;C00026316;C00038791,ChEBI=CHEBI:17450;CHEBI:32373;CHEBI:32374;CHEBI:36090;CHEBI:12876;CHEBI:58152,DrugBank=DB04066,YMDB=YMDB00498,FooDB=FDB002592;FDB002593;FDB002594;FDB004146;FDB030490,NANPDB=NANPDB_1223;NANPDB_2208;NANPDB_2217;NANPDB_3176;NANPDB_3304;NANPDB_3447;NANPDB_3450;NANPDB_3535;NANPDB_4504;NANPDB_4508,STOFF=STOFF_1011…	C9H8O3	C9H8O3	C9H8O3	8.4545	8.447	8.447
Positive	166.048	0.88	55.9588:4677 56.60054:88 73.9481:21223 74.89664:37196 75.6424:56 99.04634:134 100.02127:551 102.08812:3112 124.63948:111 130.02368:52 130.95206:2472 138.13063:75 147.22223:245 147.95502:2371 148.97554:30551	[M+H]+			yes	0.0036913	-6.4128	0.00045432	-5.6467	Amino acid	Alpha amino acids	Benzoxazinones	Pyridinecarboxylic acids	Methionine sulfoxide	(R)-2-Hydroxy-2H-1,4-benzoxazin-3(4H)-one	4-Pyridoxolactone	HMDB=HMDB0002005,ChEBI=CHEBI:17016;CHEBI:49031;CHEBI:49032;CHEBI:49033;CHEBI:49034;CHEBI:49035;CHEBI:49036;CHEBI:58772;CHEBI:58773,DrugBank=DB02235;DB02467,SMPDB=PW_C001342,YMDB=YMDB00035,FooDB=FDB022789,BMDB=BMDB02005,Urine=HMDB0002005,Saliva=HMDB0002005,Feces=HMDB0002005,ECMDB=ECMDB02005;ECMDB20295,Serum=HMDB0002005,PubChem=10909908;10062737;158980;847,PlantCyc=CPD-8990,UNPD=UNPD15039	HMDB=HMDB0038318,KNApSAcK=C00036489,ChEBI=CHEBI:63559,FooDB=FDB017651,PubChem=322636,PlantCyc=CPD-6364,UNPD=UNPD16130	HMDB=HMDB0003454,ChEBI=CHEBI:16871,YMDB=YMDB00787,FooDB=FDB023177,BMDB=BMDB03454,PubChem=151228	C5H11NO3S	C8H7NO3	C8H7NO3	8.6677	8.5251	8.3343
Positive	166.053	13.52	55.9679:2051 69.05909:166 74.117:9275 74.97839:18198 88.03078:55 99.08919:274 100.10178:217 102.11266:1115 130.96375:1398 136.21947:135 147.94576:1699 149.00645:13803	[M+H]+			yes	8.7156e-06	11.014	0.0032212	9.3019	Amino acid	Alpha amino acids	Benzoxazinones	Alpha amino acids	Methionine sulfoxide	(R)-2-Hydroxy-2H-1,4-benzoxazin-3(4H)-one	Ethiin	HMDB=HMDB0002005,ChEBI=CHEBI:17016;CHEBI:49031;CHEBI:49032;CHEBI:49033;CHEBI:49034;CHEBI:49035;CHEBI:49036;CHEBI:58772;CHEBI:58773,DrugBank=DB02235;DB02467,SMPDB=PW_C001342,YMDB=YMDB00035,FooDB=FDB022789,BMDB=BMDB02005,Urine=HMDB0002005,Saliva=HMDB0002005,Feces=HMDB0002005,ECMDB=ECMDB02005;ECMDB20295,Serum=HMDB0002005,PubChem=10909908;10062737;158980;847,PlantCyc=CPD-8990,UNPD=UNPD15039	HMDB=HMDB0038318,KNApSAcK=C00036489,ChEBI=CHEBI:63559,FooDB=FDB017651,PubChem=322636,PlantCyc=CPD-6364,UNPD=UNPD16130	HMDB=HMDB0037057,FooDB=FDB016040,PubChem=91820395,PlantCyc=CPD-9280,UNPD=UNPD26717	C5H11NO3S	C8H7NO3	C5H11NO3S	8.7918	8.3481	8.3176
Positive	166.081	2.05	75.04588:83 131.02089:367 147.54741:93 148.99303:1158	[M+H]+			yes	0.0012466	-5.4096	0.00014001	-9.093	Amino acid	Phenylalanine and derivatives	Pyridines and derivatives	Benzoic acid esters	L-Phenylalanine	5-(3-Pyridyl)-2-hydroxytetrahydrofuran	Benzocaine	HMDB=HMDB0000159,KNApSAcK=C00001386,ChEBI=CHEBI:16998;CHEBI:17295;CHEBI:28044;CHEBI:32486;CHEBI:32487;CHEBI:32494;CHEBI:32495;CHEBI:32504;CHEBI:32505;CHEBI:57981;CHEBI:58095;CHEBI:76052,DrugBank=DB00120;DB02556,SMPDB=PW_C000104,YMDB=YMDB00304;YMDB00995,T3DB=T3D4366,FooDB=FDB004940;FDB013245;FDB014705,STOFF=STOFF_8691,BMDB=BMDB00159,Urine=HMDB0000159,Saliva=HMDB0000159,Feces=HMDB0000159,ECMDB=ECMD…	HMDB=HMDB0062407,ChEBI=CHEBI:82572,PubChem=179630	HMDB=HMDB0004992,ChEBI=CHEBI:116735,DrugBank=DB01086,SMPDB=PW_C002349,T3DB=T3D2980,FooDB=FDB023574,STOFF=STOFF_327,UNPD=UNPD173084	C9H11NO2	C9H11NO2	C9H11NO2	7.7381	7.6972	7.4986
Positive	167.007	13.37	84.84272:236 125.96135:22608 143.60612:3195 149.00659:231 155.00848:68 161.80659:119 163.31142:52 166.90996:405	[M+H]+			yes	0.00011033	-10.312	0.0045959	-10.853	Other	Thiodiacetic acid derivatives	Short-chain keto acids and derivatives		thiodiacetic acid sulfoxide	Phosphinopyruvate;PPA		ChEBI=CHEBI:35013,PubChem=161772	KNApSAcK=C00000796,ChEBI=CHEBI:81404		C4H6O5S	C4H7O5P		5.8608	5.7385
Negative	167.021	11.6	96.06848:190	[M-H]-				0.084368	6.0797	0.096876	9.9193	Other	Xanthines	Xanthines	Xanthines	Uric acid	5,7-dihydro-1H-purine-2,6,8(9H)-trione	2,6,8-trihydroxypurin-7-ide	HMDB=HMDB0000289,KNApSAcK=C00007301,ChEBI=CHEBI:17775;CHEBI:46811;CHEBI:46814;CHEBI:46817;CHEBI:46821;CHEBI:46822;CHEBI:46823;CHEBI:46824;CHEBI:46825;CHEBI:46826;CHEBI:62585;CHEBI:62589,DrugBank=DB08844;DB01696,SMPDB=PW_C000195,YMDB=YMDB01494,FooDB=FDB015350;FDB031247,STOFF=STOFF_8572,BMDB=BMDB00289,Urine=HMDB0000289,Saliva=HMDB0000289,Feces=HMDB0000289,ECMDB=ECMDB00289,CSF=HMDB0000289,Serum=HMDB…	ChEBI=CHEBI:49051	ChEBI=CHEBI:46820	C5H4N4O3	C5H4N4O3	C5H4N4O3	8.499	8.2841	8.1417
Positive	168.076	13.98	74.06243:68 77.04071:108 83.11168:195 94.92961:39073 95.90033:78 97.0876:291 107.07037:1884 109.05949:178 127.07112:536 133.03761:119 140.16246:66 150.23714:201 151.0495:597	[M+H]+			yes	9.6683e-05	11.146	0.001307	9.8531	Amino acid	Alpha amino acids	Aminosalicylic acids and derivatives	Nitrobenzenes	(S)-Spinacine	aminosalicylic acid hydrazide	2,4-Diamino-6-nitrotoluene	HMDB=HMDB0029873,FooDB=FDB001102,UNPD=UNPD141981	ChEBI=CHEBI:134800	HMDB=HMDB0060362,ChEBI=CHEBI:19342,PubChem=96177	C7H9N3O2	C7H9N3O2	C7H9N3O2	8.0125	7.7133	6.9503
Negative	170.948	16.17	69.09171:137 77.05135:54 112.92609:52536 113.83659:71	[M-H]-			yes	0.0011655	10.63	4.2571e-05	11.955	No annotation
Negative	171.139	5.74	127.29071:51	[M-H]-			yes	0.047294	-8.2209	0.13614	-6.5849	Fatty acid	Medium-chain fatty acids	Fatty alcohol esters	Fatty acid esters	Capric acid	Octyl acetate	Ethyl octanoate	HMDB=HMDB0000511,KNApSAcK=C00001213,ChEBI=CHEBI:27689;CHEBI:30813,DrugBank=DB03600,SMPDB=PW_C000391,YMDB=YMDB00677,T3DB=T3D4773,FooDB=FDB012027;FDB030804,NANPDB=NANPDB_717,STOFF=STOFF_2278,BMDB=BMDB00511,LipidMAPS=LMFA01010010,Urine=HMDB0000511,Saliva=HMDB0000511,Feces=HMDB0000511,Serum=HMDB0000511,PubChem=4678093;2969,PlantCyc=CPD-3617,UNPD=UNPD103170	HMDB=HMDB0038602,KNApSAcK=C00035557,ChEBI=CHEBI:87495,YMDB=YMDB01477,FooDB=FDB017993,LipidMAPS=LMFA07010197,Feces=HMDB0038602,UNPD=UNPD91985	HMDB=HMDB0040195,KNApSAcK=C00035613,ChEBI=CHEBI:87426,YMDB=YMDB01389,FooDB=FDB019907,LipidMAPS=LMFA07010447,UNPD=UNPD69254	C10H20O2	C10H20O2	C10H20O2	9.1908	9.1731	9.1161
Negative	173.077	4.4	110.9511:2383 152.93443:54 155.07069:89	[M-H]-			yes	5.9517e-05	-10.054	0.019155	-2.3122	Fatty acid	Medium-chain fatty acids	Medium-chain fatty acids	Medium-chain fatty acids	Suberic acid	2-Propylglutaric acid	2,4-Dimethyladipic acid	HMDB=HMDB0000893,KNApSAcK=C00001204,ChEBI=CHEBI:9300;CHEBI:76282,FooDB=FDB003340,BMDB=BMDB00893,LipidMAPS=LMFA01170001,Urine=HMDB0000893,Feces=HMDB0000893,CSF=HMDB0000893,Serum=HMDB0000893,PlantCyc=CPD0-1264,UNPD=UNPD12255	HMDB=HMDB0060684,ChEBI=CHEBI:80644,SMPDB=PW_C040548,Urine=HMDB0060684,Serum=HMDB0060684,PubChem=134970	HMDB=HMDB0059727,ChEBI=CHEBI:89933,Urine=HMDB0059727	C8H14O4	C8H14O4	C8H14O4	8.4922	8.4718	8.4553
Negative	173.105	19.01	114.33081:290 131.44374:486 155.20891:327 156.2718:8572 156.9182:120	[M-H]-				0.37632	3.4606	0.37511	-2.2786	Amino acid	L-alpha-amino acids	Beta amino acids and derivatives	Arginine and derivatives	L-Arginine	isoarginine	Arginine hydrochloride	HMDB=HMDB0000517;HMDB0003416;HMDB0062762,KNApSAcK=C00001340,ChEBI=CHEBI:15816;CHEBI:16467;CHEBI:29016;CHEBI:32682;CHEBI:32681;CHEBI:32683;CHEBI:32688;CHEBI:32689;CHEBI:32690;CHEBI:32695;CHEBI:32696;CHEBI:32697,DrugBank=DB00125;DB04027,SMPDB=PW_C000396;PW_C001880,YMDB=YMDB00592,T3DB=T3D4289,FooDB=FDB002257;FDB023167;FDB030954,STOFF=STOFF_6956,BMDB=BMDB00517;BMDB03416,Urine=HMDB0000517,Saliva=HMDB0…	ChEBI=CHEBI:85624,PubChem=91820574	ChEBI=CHEBI:31235,FooDB=FDB011914	C6H14N4O2	C6H14N4O2	C6H14N4O2	5.8389	5.4269	5.4223
Positive	173.134	0.92	72.17218:94 75.2148:95 89.0372:90 97.06923:130 98.86177:3318 112.98311:8536 114.084:3874 115.08389:2320 131.90739:75 140.98021:563 142.92677:500 154.339:64 155.17873:681 156.08846:29659	[M+H]+			yes	0.0025821	-5.3412	0.00048404	-2.9655	Other	Naphthalenes	Pyrrolidine-2-ones	Acetamides	1,2-Dihydro-1,1,6-trimethylnaphthalene	(3S)-3-[(2S)-2-amino-3-hydroxybutyl]pyrrolidin-2-one	C00050425	HMDB=HMDB0040284,ChEBI=CHEBI:89773,YMDB=YMDB01576,FooDB=FDB020005,Urine=HMDB0040284,UNPD=UNPD134768	ChEBI=CHEBI:42229	KNApSAcK=C00050425,ChEBI=CHEBI:2412	C13H16	C8H16N2O2	C7H16N4O	7.6413	7.5327	7.2874
Negative	174.035	1.16	59.06712:420 71.00864:109 88.08791:1760 112.12985:337 113.92587:5975 114.96472:829 155.96397:2389	[M-H]-			yes	0.002909	-3.9632	0.00017228	-5.5374	Amino acid	Alpha amino acids	Aspartic acid and derivatives	Glutamic acid and derivatives	2-Amino-3-oxoadipate	N-Acetyl-L-aspartic acid	N-Formyl-L-glutamic acid	HMDB=HMDB0060273,ChEBI=CHEBI:28095,LipidMAPS=LMFA01100036	HMDB=HMDB0000812,ChEBI=CHEBI:16953;CHEBI:21547,SMPDB=PW_C000649,T3DB=T3D4310,FooDB=FDB022260,BMDB=BMDB00812,Urine=HMDB0000812,Saliva=HMDB0000812,Feces=HMDB0000812,CSF=HMDB0000812,Serum=HMDB0000812,PubChem=2042020;65065,UNPD=UNPD77974	HMDB=HMDB0003470,ChEBI=CHEBI:17684;CHEBI:48309,SMPDB=PW_C001903,FooDB=FDB023180,BMDB=BMDB03470,PubChem=5459967;439376	C6H9NO5	C6H9NO5	C6H9NO5	8.6113	8.2369	8.2281
Negative	174.041	13.64	59.10893:371 88.11347:719 112.09567:80 113.89482:5286 115.067:494 155.93909:1839	[M-H]-			yes	0.033447	4.8756	0.00020189	6.722	Amino acid	Alpha amino acids	Aspartic acid and derivatives	Glutamic acid and derivatives	2-Amino-3-oxoadipate	N-Acetyl-L-aspartic acid	N-Formyl-L-glutamic acid	HMDB=HMDB0060273,ChEBI=CHEBI:28095,LipidMAPS=LMFA01100036	HMDB=HMDB0000812,ChEBI=CHEBI:16953;CHEBI:21547,SMPDB=PW_C000649,T3DB=T3D4310,FooDB=FDB022260,BMDB=BMDB00812,Urine=HMDB0000812,Saliva=HMDB0000812,Feces=HMDB0000812,CSF=HMDB0000812,Serum=HMDB0000812,PubChem=2042020;65065,UNPD=UNPD77974	HMDB=HMDB0003470,ChEBI=CHEBI:17684;CHEBI:48309,SMPDB=PW_C001903,FooDB=FDB023180,BMDB=BMDB03470,PubChem=5459967;439376	C6H9NO5	C6H9NO5	C6H9NO5	8.6846	8.3194	8.3123
Negative	174.937	15.44	78.99378:537 81.04867:86 156.93617:4503	[M-H]-		yes	yes	0.35721	8.8467	0.002478	10.473	No annotation
Negative	174.951	1.46	146.80919:2864 157.05513:50	[M-H]-			yes	0.00057619	-10.306	0.0001892	-10.818	No annotation
Positive	175.113	0.82	60.05092:11526 70.04477:5662 72.02616:816 86.88433:77 88.13011:68 97.05974:117 98.09299:89 111.96065:2698 113.06363:1918 113.91013:1111 116.02827:18259 140.02437:1183 157.045:11058 158.07487:22784	[M+H]+			yes	3.1713e-06	-7.1092	3.1789e-05	-11.364	Amino acid	L-alpha-amino acids	Dipeptides	N-acyl-L-alpha-amino acids	L-Arginine	Glycyl-Valine	N-Acetylornithine	HMDB=HMDB0000517;HMDB0003416;HMDB0062762,KNApSAcK=C00001340,ChEBI=CHEBI:15816;CHEBI:16467;CHEBI:29016;CHEBI:32682;CHEBI:32681;CHEBI:32683;CHEBI:32688;CHEBI:32689;CHEBI:32690;CHEBI:32695;CHEBI:32696;CHEBI:32697,DrugBank=DB00125;DB04027,SMPDB=PW_C000396;PW_C001880,YMDB=YMDB00592,T3DB=T3D4289,FooDB=FDB002257;FDB023167;FDB030954,STOFF=STOFF_6956,BMDB=BMDB00517;BMDB03416,Urine=HMDB0000517,Saliva=HMDB0…	HMDB=HMDB0028854,ChEBI=CHEBI:73897;CHEBI:73922,Saliva=HMDB0028854,Feces=HMDB0028854	HMDB=HMDB0003357,ChEBI=CHEBI:16543;CHEBI:57805,YMDB=YMDB00028,FooDB=FDB023152;FDB031020,BMDB=BMDB03357,Urine=HMDB0003357,Saliva=HMDB0003357,ECMDB=ECMDB03357,Serum=HMDB0003357,PubChem=6992102;439232,PlantCyc=N-ALPHA-ACETYLORNITHINE	C6H14N4O2	C7H14N2O3	C7H14N2O3	8.7417	8.4725	8.4462
Positive	175.119	19.73	60.05169:17310 70.06595:4998 71.18442:321 72.17068:398 88.10674:177 97.1274:181 98.13278:65 112.11423:2844 113.10674:519 114.17998:1605 115.09393:1140 116.08414:18820 140.11803:1006 141.20821:323 157.02435:22581 158.11163:31049 158.91315:152	[M+H]+			yes	0.0033135	2.356	0.00013376	3.3078	Amino acid	L-alpha-amino acids	Arginine and derivatives	Arginine and derivatives	L-Arginine	Arginine hydrochloride	Arginine glutamate	HMDB=HMDB0000517;HMDB0003416;HMDB0062762,KNApSAcK=C00001340,ChEBI=CHEBI:15816;CHEBI:16467;CHEBI:29016;CHEBI:32682;CHEBI:32681;CHEBI:32683;CHEBI:32688;CHEBI:32689;CHEBI:32690;CHEBI:32695;CHEBI:32696;CHEBI:32697,DrugBank=DB00125;DB04027,SMPDB=PW_C000396;PW_C001880,YMDB=YMDB00592,T3DB=T3D4289,FooDB=FDB002257;FDB023167;FDB030954,STOFF=STOFF_6956,BMDB=BMDB00517;BMDB03416,Urine=HMDB0000517,Saliva=HMDB0…	ChEBI=CHEBI:31235,FooDB=FDB011914	ChEBI=CHEBI:31234	C6H14N4O2	C6H14N4O2	C6H14N4O2	9.0483	8.6317	8.6317
Negative	176.895	15.1	159.78564:255	[M-H]-		yes	yes	0.1237	4.5001	0.042065	4.5054	No annotation
Positive	176.966	13.67	93.92319:76 96.79535:102 114.98538:80 120.02544:54 135.79684:57 153.88445:71 159.05809:148 173.75487:231 176.92549:1310	[M+H]+			yes	2.0013e-05	-8.5291	0.00047306	-8.7329	No annotation
Negative	179.056	18.24	59.63728:72 71.84794:54 87.67218:227 89.35002:792 101.48167:227 113.37054:665 118.67664:139 119.36121:245 143.26134:1420 148.43459:51 149.14319:115 158.70978:52 160.15068:156 161.19193:689	[M-H]-			yes	0.00069709	-11.973	7.2125e-05	-12.522	Carbohydrate	Monosaccharides	Cyclohexanols	Hexoses	D-Tagatose	myo-Inositol	Glycoprotein-phospho-D-mannose	HMDB=HMDB0003418;HMDB0062538,KNApSAcK=C00033848,ChEBI=CHEBI:27605;CHEBI:48095;CHEBI:13022;CHEBI:13172;CHEBI:37724;CHEBI:47693;CHEBI:134275,DrugBank=DB04936,YMDB=YMDB00657,STOFF=STOFF_1679,BMDB=BMDB03418,Saliva=HMDB0003418,PubChem=107428;6904;5984,PlantCyc=CPD-15616;CPD-15382,UNPD=UNPD11673;UNPD157348;UNPD28362;UNPD42482	HMDB=HMDB0000211;HMDB0006088;HMDB0034220;HMDB0062138;HMDB0240207;HMDB0240208;HMDB0240209;HMDB0240210;HMDB0240211,KNApSAcK=C00001164,ChEBI=CHEBI:10642;CHEBI:17268;CHEBI:27372;CHEBI:27374;CHEBI:27987;CHEBI:22357;CHEBI:23311;CHEBI:23927;CHEBI:24848;CHEBI:25492,DrugBank=DB03106,SMPDB=PW_C000137,YMDB=YMDB00173,FooDB=FDB001138;FDB010547;FDB012525;FDB023828;FDB030285,STOFF=STOFF_452,BMDB=BMDB00211,Urine…	HMDB=HMDB0062473,KNApSAcK=C00019681;C00042470;C00050440,ChEBI=CHEBI:17118;CHEBI:28014;CHEBI:28385;CHEBI:40822;CHEBI:42758;CHEBI:37617;CHEBI:37626;CHEBI:37675;CHEBI:37681;CHEBI:37695;CHEBI:37701;CHEBI:37746;CHEBI:68461;CHEBI:86058;CHEBI:134625,DrugBank=DB01914,YMDB=YMDB00789,FooDB=FDB031288,NANPDB=NANPDB_3520;NANPDB_3521,PubChem=3037556;161658,PlantCyc=CPD-15374;CPD-15373,UNPD=UNPD142849;UNPD3363;…	C6H12O6	C6H12O6	C6H12O6	5.8603	5.8603	5.8603
Negative	180.067	18.43	93.4817:155 119.43491:261 162.45668:142 163.21147:1831	[M-H]-			yes	0.0029858	-6.4388	0.00012344	-9.6992	Amino acid	Beta amino acids and derivatives	Phenylalanine and derivatives	Tyrosine and derivatives	Beta-Tyrosine	Meta-Tyrosine	L-Tyrosine	HMDB=HMDB0003831,ChEBI=CHEBI:16939;CHEBI:19960;CHEBI:57956,FooDB=FDB023232,BMDB=BMDB03831,PubChem=6934230;440311	HMDB=HMDB0059720,ChEBI=CHEBI:44303;CHEBI:78290,DrugBank=DB02387;DB03552,UNPD=UNPD93879	HMDB=HMDB0000158,KNApSAcK=C00001397,ChEBI=CHEBI:17895;CHEBI:18186;CHEBI:28479;CHEBI:32760;CHEBI:32761;CHEBI:32762;CHEBI:32773;CHEBI:32774;CHEBI:32775;CHEBI:32784;CHEBI:32785;CHEBI:32786;CHEBI:58315;CHEBI:58570,DrugBank=DB00135;DB03839,SMPDB=PW_C000103,YMDB=YMDB00364;YMDB00805,T3DB=T3D4371,FooDB=FDB000446,STOFF=STOFF_8573,BMDB=BMDB00158,Urine=HMDB0000158,Saliva=HMDB0000158,Feces=HMDB0000158,ECMDB=…	C9H11NO3	C9H11NO3	C9H11NO3	6.487	6.4618	6.4618
Positive	180.087	0.71	72.13283:69 84.97964:1917 90.15262:72 95.94211:133 97.06664:765 114.04726:964 114.98622:199 121.16298:163 126.22327:611 127.02586:2208 137.97054:123 144.85521:21779 160.36758:114 162.2762:18309 162.94566:34097	[M+H]+			yes	0.0017926	13.24	0.00087374	14.154	Carbohydrate	Hexoses	Hexoses	Monosaccharides	Glucosamine	alpha-D-kanosamine	Fructosamine	HMDB=HMDB0001514;HMDB0030091,KNApSAcK=C00001121,ChEBI=CHEBI:28393;CHEBI:44678;CHEBI:47977;CHEBI:39610;CHEBI:58723;CHEBI:60312;CHEBI:62325;CHEBI:133904,DrugBank=DB01296;DB02678,SMPDB=PW_C001167,YMDB=YMDB01702,FooDB=FDB001474;FDB004663;FDB022668,BMDB=BMDB01514,Urine=HMDB0001514,Saliva=HMDB0001514,Feces=HMDB0001514,ECMDB=ECMDB01514;ECMDB20142;ECMDB20275,Serum=HMDB0001514,PubChem=439213;24154;739,Pla…	ChEBI=CHEBI:72343;CHEBI:72344;CHEBI:72725;CHEBI:72732,PubChem=448758;443709,UNPD=UNPD161721	HMDB=HMDB0002030,FooDB=FDB022807,BMDB=BMDB02030,Saliva=HMDB0002030,Serum=HMDB0002030,PubChem=20484	C6H13NO5	C6H13NO5	C6H13NO5	8.7098	7.815	7.7841
Negative	181.072	18.55	89.32906:203 101.38393:421 113.6405:87 118.63634:115 120.30699:88 143.36487:54 149.23903:93 163.30202:574 164.41779:115	[M-H]-			yes	0.0059648	-8.1533	1.4169e-05	-8.6505	Carbohydrate	Sugar alcohols	Fluorenes	L-alpha-amino acids	Galactitol	9-Hydroxyfluorene	L-Lathyrine	HMDB=HMDB0000107;HMDB0000247;HMDB0000765;HMDB0011632,KNApSAcK=C00001160;C00001165;C00001173;C00047000,ChEBI=CHEBI:16813;CHEBI:16899;CHEBI:17459;CHEBI:17924;CHEBI:18202;CHEBI:28789;CHEBI:38030;CHEBI:87978;CHEBI:125392;CHEBI:134311,DrugBank=DB00742;DB01638,SMPDB=PW_C000069;PW_C000168,YMDB=YMDB00087;YMDB00656;YMDB00724;YMDB00830,T3DB=T3D4349,FooDB=FDB001982;FDB006453;FDB011676;FDB028331;FDB030767;FD…	HMDB=HMDB0059803,ChEBI=CHEBI:16904,T3DB=T3D3991,Urine=HMDB0059803,PubChem=74318	KNApSAcK=C00001376,ChEBI=CHEBI:6259,PubChem=25203094,PlantCyc=LATHYRINE,UNPD=UNPD12197	C6H14O6	C13H10O	C7H10N4O2	6.1766	5.5392	5.5029
Positive	182.075	0.92	90.90305:428 118.92371:2231 123.02373:475 146.91443:1458 154.04723:145 159.02083:349 164.98088:117445	[M+H]+			yes	0.0086788	-4.575	0.00038941	-3.7961	Amino acid	Phenylalanine and derivatives	Tyrosine and derivatives	Phenylalanine and derivatives	Meta-Tyrosine	L-Tyrosine	o-Tyrosine	HMDB=HMDB0059720,ChEBI=CHEBI:44303;CHEBI:78290,DrugBank=DB02387;DB03552,UNPD=UNPD93879	HMDB=HMDB0000158,KNApSAcK=C00001397,ChEBI=CHEBI:17895;CHEBI:18186;CHEBI:28479;CHEBI:32760;CHEBI:32761;CHEBI:32762;CHEBI:32773;CHEBI:32774;CHEBI:32775;CHEBI:32784;CHEBI:32785;CHEBI:32786;CHEBI:58315;CHEBI:58570,DrugBank=DB00135;DB03839,SMPDB=PW_C000103,YMDB=YMDB00364;YMDB00805,T3DB=T3D4371,FooDB=FDB000446,STOFF=STOFF_8573,BMDB=BMDB00158,Urine=HMDB0000158,Saliva=HMDB0000158,Feces=HMDB0000158,ECMDB=…	HMDB=HMDB0006050,ChEBI=CHEBI:91037;CHEBI:91038;CHEBI:91041,FooDB=FDB023822,BMDB=BMDB06050,Urine=HMDB0006050,Feces=HMDB0006050,Serum=HMDB0006050,UNPD=UNPD56807	C9H11NO3	C9H11NO3	C9H11NO3	8.661	8.661	8.661
Positive	182.98	13.55	98.06926:79 141.81761:18238 159.77928:3653 165.15364:50 170.64807:155 182.83339:510	[M+H]+			yes	0.00021375	-10.363	7.1895e-05	-10.585	Fatty acid	Thia fatty acids			Succimer			HMDB=HMDB0014706,ChEBI=CHEBI:63623,DrugBank=DB00566,STOFF=STOFF_10444,Urine=HMDB0014706,Serum=HMDB0014706			C4H6O4S2			6.0102
Positive	184.98	13.38	98.96971:160 100.01208:169 102.12073:141 125.92432:181 143.91014:3598 156.8177:68 161.8824:1034 184.69151:84	[M+H]+			yes	0.00030836	-8.8496	0.0036156	-9.4329	Glycerophosphate	Glycerone phosphates			Phosphohydroxypyruvic acid			HMDB=HMDB0001024,KNApSAcK=C00019657,ChEBI=CHEBI:18110;CHEBI:30933,SMPDB=PW_C000810,YMDB=YMDB00393;YMDB01061,FooDB=FDB022377;FDB030461,BMDB=BMDB01024,ECMDB=ECMDB01024,PubChem=5460375;105,PlantCyc=3-P-HYDROXYPYRUVATE			C3H5O7P			5.3063
Negative	186.114	7.75	97.54388:486 123.33554:137 125.35635:12104 168.4158:320 169.23799:52	[M-H]-			yes	0.0023108	-10.021	1.5604e-05	-10.643	Fatty acid	Medium-chain fatty acids	N-acyl-alpha amino acids	L-alpha-amino acids	Polyethylene glycol	N-Heptanoylglycine	(E)-2-Butenyl-4-methyl-threonine	HMDB=HMDB0037790,KNApSAcK=C00000758,ChEBI=CHEBI:15830;CHEBI:12266;CHEBI:57532,DrugBank=DB02274,YMDB=YMDB00905,FooDB=FDB016934,LipidMAPS=LMFA01060168,Saliva=HMDB0037790,ECMDB=ECMDB20111,PubChem=25244029;173,PlantCyc=8-AMINO-7-OXONONANOATE,UNPD=UNPD76434	HMDB=HMDB0013010,ChEBI=CHEBI:74433,FooDB=FDB029243	ChEBI=CHEBI:29458	C9H17NO3	C9H17NO3	C9H17NO3	5.532	5.1153	4.6987
Positive	186.951	13.69	96.98291:2222 107.80115:115 114.86299:4377 117.69676:258 124.92973:2208 128.84935:429 135.91136:907 145.75636:4009 150.90576:86 159.04868:192 163.85901:6606 181.76833:542 186.82358:190	[M+H]+			yes	7.8792e-05	-11.88	0.00025827	-12.059	No annotation
Negative	187.092	5.01	97.09323:195 123.11166:115 125.0273:13968 169.06424:297	[M-H]-			yes	0.0011063	-3.7298	5.3973e-05	-12.36	Fatty acid	Medium-chain fatty acids	Medium-chain fatty acids	Fatty acid esters	3-Methylsuberic acid	Azelaic acid	cis- and trans-Ethyl 2,4-dimethyl-1,3-dioxolane-2-acetate	HMDB=HMDB0059783,ChEBI=CHEBI:89847,LipidMAPS=LMFA01030981,Urine=HMDB0059783,UNPD=UNPD116253	HMDB=HMDB0000784,KNApSAcK=C00045634,ChEBI=CHEBI:48131;CHEBI:78208,DrugBank=DB00548,T3DB=T3D4799,FooDB=FDB012192,STOFF=STOFF_2610,BMDB=BMDB00784,LipidMAPS=LMFA01170054,Urine=HMDB0000784,Saliva=HMDB0000784,Feces=HMDB0000784,CSF=HMDB0000784,Serum=HMDB0000784,UNPD=UNPD104030	HMDB=HMDB0032200,FooDB=FDB009181,LipidMAPS=LMFA07010803	C9H16O4	C9H16O4	C9H16O4	8.7992	8.5213	8.4615
Negative	190.923	13.57	101.00262:86 101.88551:109 102.95132:5977 162.79639:74	[M-H]-			yes	6.8726e-05	-11.377	0.00020578	-11.678	No annotation
Negative	191.014	1.17	84.95537:267 87.07668:343 102.91519:192 110.86212:24644 129.01453:806 130.85966:411 154.80571:88 172.91367:3577	[M-H]-			yes	0.0022789	-3.4818	0.00075587	-4.2722	Carbohydrate	Sugar acids and derivatives	Gamma butyrolactones	Tricarboxylic acids and derivatives	Diketogulonic acid	D-Glucaro-1,4-lactone	Citric acid	HMDB=HMDB0005971;HMDB0006511;HMDB0062803,ChEBI=CHEBI:15622;CHEBI:57441,FooDB=FDB023950;FDB030298,BMDB=BMDB05971;BMDB06511,LipidMAPS=LMFA01060195,ECMDB=ECMDB06511,PubChem=53477844;21145097;440390,PlantCyc=CPD-334	HMDB=HMDB0041862,ChEBI=CHEBI:85317;CHEBI:85336;CHEBI:85532;CHEBI:85805,PubChem=91666371;90658314;13035175	HMDB=HMDB0000094,KNApSAcK=C00007619,ChEBI=CHEBI:16947;CHEBI:30769;CHEBI:35802;CHEBI:35806;CHEBI:35809;CHEBI:35810;CHEBI:76049,DrugBank=DB04272,SMPDB=PW_C000063,YMDB=YMDB00086,FooDB=FDB012586;FDB030735,STOFF=STOFF_39,BMDB=BMDB00094,Urine=HMDB0000094,Saliva=HMDB0000094,Feces=HMDB0000094,ECMDB=ECMDB00094,CSF=HMDB0000094,Serum=HMDB0000094,PubChem=31348;311,PlantCyc=CIT,UNPD=UNPD145647	C6H8O7	C6H8O7	C6H8O7	8.6369	8.1697	8.0417
Negative	191.968	16.16	69.08568:64 84.06857:500 96.01085:868 98.0349:3951 112.9361:6627 168.99623:311	[M-H]-			yes	0.00081698	9.505	9.8095e-05	10.694	No annotation
Positive	192.138	16.83	58.82903:1491 105.54398:677 133.37744:10054	[M+H]+			yes	0.00091795	-9.5653	0.00013845	-10.171	Other	Phenylmorpholines	Sulfoxides	Acetanilides	Phendimetrazine	8-(methylsulfinyl)octylamine	N-Acetyl-2,6-diethylaniline	HMDB=HMDB0015519,ChEBI=CHEBI:8059,DrugBank=DB01579,STOFF=STOFF_1217,Urine=HMDB0015519,Serum=HMDB0015519	ChEBI=CHEBI:91158	HMDB=HMDB0032854,FooDB=FDB010831	C12H17NO	C9H21NOS	C12H17NO	5.1853	4.8577	4.7687
Negative	192.923	13.4	102.92664:3834 128.87112:59 163.8929:81	[M-H]-				0.28048	-1.1951	0.14107	-1.0057	No annotation
Negative	194.988	17.84	113.31956:11212 127.27109:9487	[M-H]-				0.37632	3.4048	0.12179	4.0541	Fatty acid	Sulfated fatty acids	Sulfated fatty acids	Sulfated fatty acids	2-methyl-4-(sulfooxy)but-2-enoic acid	(2Z)-2-[(sulfooxy)methyl]but-2-enoic acid	3-methyl-4-(sulfooxy)but-2-enoic acid	HMDB=HMDB0129120	HMDB=HMDB0129117	HMDB=HMDB0128930	C5H8O6S	C5H8O6S	C5H8O6S	4.4237	4.4237	4.4237
Negative	195.051	19.6	59.77744:67 69.86449:163 71.72987:124 75.56511:2309 82.55085:54 83.69248:58 85.42904:989 87.60307:1478 89.4323:255 97.63364:111 99.40608:3616 101.50017:198 111.49812:513 113.27393:282 129.24759:44082 131.43166:139 141.28111:841 159.15334:3979 177.14853:5203	[M-H]-			yes	8.9075e-06	-12.434	0.00013845	-13.43	Carbohydrate	Medium-chain hydroxy acids and derivatives	Hydroxy fatty acids	Xanthines	Galactonic acid	2-carboxy-D-arabinitol	1,3-Dimethyluric acid	HMDB=HMDB0000565;HMDB0000625;HMDB0003290,KNApSAcK=C00007303;C00034850,ChEBI=CHEBI:16154;CHEBI:16534;CHEBI:17360;CHEBI:17767;CHEBI:17796;CHEBI:18391;CHEBI:33076;CHEBI:33198;CHEBI:12931;CHEBI:13115;CHEBI:21336;CHEBI:37425;CHEBI:46644;CHEBI:53071;CHEBI:86359;CHEBI:87753,DrugBank=DB04304,YMDB=YMDB00383,T3DB=T3D1157;T3D4960,FooDB=FDB001855;FDB001980;FDB016203;FDB020175;FDB022122;FDB023136,STOFF=STOFF_…	ChEBI=CHEBI:17077;CHEBI:58008,FooDB=FDB020764,PubChem=25202685,PlantCyc=2-CARBOXY-D-ARABINITOL,UNPD=UNPD120124	HMDB=HMDB0001857,ChEBI=CHEBI:68447,FooDB=FDB022712,BMDB=BMDB01857,Urine=HMDB0001857,Feces=HMDB0001857,Serum=HMDB0001857,PubChem=70346,UNPD=UNPD6381	C6H12O7	C6H12O7	C7H8N4O3	5.8435	5.3805	4.8932
Positive	198.179	14.73	67.08469:208 69.0438:869 71.15083:191 72.10214:193 79.02649:411 81.06388:611 82.32645:197 83.04361:1580 84.22327:61 85.05388:112 86.07027:170 90.92953:75 93.09964:855 95.09564:804 96.99007:1729 99.97444:694 102.01579:74 107.0778:917 109.07491:207 110.9397:497 114.00903:367 121.1488:824 123.08604:143 124.27271:130 124.95938:302 128.09372:251 134.98981:59 138.27299:67 139.02382:193 141.98256:148 15…	[M+H]+			yes	0.011593	1.7285	0.2331	0.56006	No annotation
Positive	199.982	13.68	69.0466:86 83.05219:77 95.64236:79 96.99394:232 98.15218:103 122.17668:63 129.03125:83 143.07083:78 158.85641:46471 160.93356:110 176.1801:950 176.83568:5526 181.16168:57 182.23634:56 186.64769:65 187.66927:216 188.30858:121 194.65291:130 199.69528:272	[M+H]+			yes	9.6683e-05	-10.022	0.00015743	-7.7955	No annotation
Negative	203.065	6.44	162.2896:6431 163.05467:274	[M-H]-			yes	0.0053763	-8.3381	0.00033578	-8.1702	Other	Imidazothiazoles	Dipeptides	Dipeptides	Levamisole	gamma-Glutamylglycine	Aspartyl-Alanine	HMDB=HMDB0014986,ChEBI=CHEBI:6432;CHEBI:77278;CHEBI:77282,DrugBank=DB00848,STOFF=STOFF_3433,Urine=HMDB0014986,Serum=HMDB0014986	HMDB=HMDB0011667,ChEBI=CHEBI:73843;CHEBI:73845;CHEBI:133031,FooDB=FDB028356,BMDB=BMDB11667,UNPD=UNPD173365	HMDB=HMDB0028746,ChEBI=CHEBI:73826,UNPD=UNPD163824	C11H12N2S	C7H12N2O5	C7H12N2O5	4.9263	4.9043	4.9043
Negative	204.024	3.02	115.89081:190 129.91037:57	[M-H]-			yes	0.0026327	-13.261	0.0035393	-13.582	Organic acid	Quinoline carboxylic acids	Quinoline carboxylic acids	Quinoline carboxylic acids	4,6-Dihydroxy-2-quinolinecarboxylic acid	2-hydroxy-4-quinolone-3-carboxylic acid	Zeanic acid	HMDB=HMDB0033528,KNApSAcK=C00001540,ChEBI=CHEBI:2195,FooDB=FDB011585,PubChem=440752,UNPD=UNPD156697	ChEBI=CHEBI:74804	HMDB=HMDB0032963,FooDB=FDB010949,UNPD=UNPD155771	C10H7NO4	C10H7NO4	C10H7NO4	8.1301	7.8622	7.6656
Positive	204.117	0.92	60.05913:501 85.00319:8138 126.1015:139 138.03784:114 140.11774:53 144.33641:726 145.00577:3146 168.06506:159 172.05417:60 176.0594:56 183.09106:93 185.96655:440 191.89874:350	[M+H]+			yes	0.0060771	-6.2338	7.2004e-05	-8.6593	Acyl carnitinr	Acyl carnitines	C-glycosyl compounds	Leucine and derivatives	L-Acetylcarnitine	2-[(2R,5R,6S)-5-amino-6-(hydroxymethyl)-2-oxanyl]acetic acid methyl ester	N-lactoyl-Leucine	HMDB=HMDB0000201,ChEBI=CHEBI:15960;CHEBI:57589;CHEBI:73024;CHEBI:86045,DrugBank=DB08842,SMPDB=PW_C000129,YMDB=YMDB00351;YMDB00617,FooDB=FDB021904,BMDB=BMDB00201,LipidMAPS=LMFA07070049;LMFA07070050;LMFA07070060,Urine=HMDB0000201,Saliva=HMDB0000201,Feces=HMDB0000201,CSF=HMDB0000201,Serum=HMDB0000201,PubChem=7045767;439756;1,UNPD=UNPD80983	ChEBI=CHEBI:100791;CHEBI:103090;CHEBI:103219	HMDB=HMDB0062176,Serum=HMDB0062176,UNPD=UNPD230149	C9H17NO4	C9H17NO4	C9H17NO4	8.435	7.8253	7.74
Positive	204.123	16.21	60.88166:504 85.57504:8613 144.54036:962 145.19647:3189 145.93474:58	[M+H]+			yes	0.001382	-9.9818	0.0034344	-10.171	Acyl carnitinr	Acyl carnitines	C-glycosyl compounds	Leucine and derivatives	L-Acetylcarnitine	2-[(2R,5R,6S)-5-amino-6-(hydroxymethyl)-2-oxanyl]acetic acid methyl ester	N-lactoyl-Leucine	HMDB=HMDB0000201,ChEBI=CHEBI:15960;CHEBI:57589;CHEBI:73024;CHEBI:86045,DrugBank=DB08842,SMPDB=PW_C000129,YMDB=YMDB00351;YMDB00617,FooDB=FDB021904,BMDB=BMDB00201,LipidMAPS=LMFA07070049;LMFA07070050;LMFA07070060,Urine=HMDB0000201,Saliva=HMDB0000201,Feces=HMDB0000201,CSF=HMDB0000201,Serum=HMDB0000201,PubChem=7045767;439756;1,UNPD=UNPD80983	ChEBI=CHEBI:100791;CHEBI:103090;CHEBI:103219	HMDB=HMDB0062176,Serum=HMDB0062176,UNPD=UNPD230149	C9H17NO4	C9H17NO4	C9H17NO4	7.2842	6.469	6.2946
Positive	204.96	13.67	87.15352:160 96.84972:205 115.06108:150 132.8199:372 163.88509:52 176.82808:1510 181.96191:72 187.19051:67 193.01588:194 194.98215:65	[M+H]+			yes	0.00013791	-9.0346	0.00073706	-6.688	No annotation
Positive	205.073	4.66	86.89833:71 163.87859:7731 165.07507:308 177.03203:101 181.33047:55 193.26494:81	[M+H]+			yes	0.0015582	-8.7802	6.4185e-05	-8.7862	Other	Imidazothiazoles	Alkyl-phenylketones	Butenolides	Levamisole	1-(2-hydroxyphenyl)-2-(2H-tetrazol-5-yl)ethanone	3-o-Ethyl-L-ascorbic acid	HMDB=HMDB0014986,ChEBI=CHEBI:6432;CHEBI:77278;CHEBI:77282,DrugBank=DB00848,STOFF=STOFF_3433,Urine=HMDB0014986,Serum=HMDB0014986	ChEBI=CHEBI:107399	ChEBI=CHEBI:81688	C11H12N2S	C9H8N4O2	C8H12O6	7.7445	7.6188	7.5359
Positive	205.091	3.16	86.89589:104 132.02551:120 146.07196:147 186.54375:92 188.00166:91812	[M+H]+			yes	0.00010223	-9.476	3.1846e-05	-9.9526	Organic acid	Indolyl carboxylic acids and derivatives	Phenylpyrazoles	Phenylhydantoins	L-Tryptophan	4-Hydroxyantipyrine	Ethotoin	HMDB=HMDB0000929;HMDB0013609;HMDB0030396,KNApSAcK=C00001396,ChEBI=CHEBI:16296;CHEBI:16828;CHEBI:27897;CHEBI:32702;CHEBI:32704;CHEBI:32716;CHEBI:32717;CHEBI:32727;CHEBI:32728;CHEBI:57719;CHEBI:57912;CHEBI:64554,DrugBank=DB00150,SMPDB=PW_C000741,YMDB=YMDB00126;YMDB00998,T3DB=T3D4369,FooDB=FDB002250;FDB002251;FDB029595,NANPDB=NANPDB_3851,STOFF=STOFF_8693,BMDB=BMDB00929,Urine=HMDB0000929;HMDB0030396,…	HMDB=HMDB0060878,ChEBI=CHEBI:94641,STOFF=STOFF_8510,Urine=HMDB0060878,Serum=HMDB0060878	HMDB=HMDB0014892,ChEBI=CHEBI:4888;CHEBI:60359;CHEBI:60360,DrugBank=DB00754,T3DB=T3D2883,Urine=HMDB0014892,Serum=HMDB0014892	C11H12N2O2	C11H12N2O2	C11H12N2O2	8.6417	8.5388	8.5219
Negative	205.16	7.63	163.32945:105 189.31445:286	[M-H]-			yes	0.00044663	-10.34	4.2571e-05	-10.667	Terpenoid	Sesquiterpenoids	Sesquiterpenoids	Sesquiterpenoids	alpha-Irone	delta-Methylionone	3-Methyl-4-(2,6,6-trimethyl-2-cyclohexen-1-yl)-3-buten-2-one	HMDB=HMDB0035631;HMDB0061831,KNApSAcK=C00003153;C00003154,ChEBI=CHEBI:62;CHEBI:10284;CHEBI:88618,FooDB=FDB014339,Saliva=HMDB0061831,UNPD=UNPD178530;UNPD46485;UNPD87864;UNPD89591;UNPD89765	HMDB=HMDB0031737,FooDB=FDB008405	HMDB=HMDB0031738,YMDB=YMDB01634,T3DB=T3D4853,FooDB=FDB008406;FDB008407,STOFF=STOFF_2505	C14H22O	C14H22O	C14H22O	8.7686	8.3361	8.3171
Negative	205.833	13.66	125.84364:1244 143.7952:78 176.68544:62	[M-H]-			yes	0.00087727	-10.131	0.0015502	-3.5188	No annotation
Positive	206.038	3.01	87.0782:76 132.05899:917 133.87375:58 146.3979:67 177.91664:11261 187.99455:7798 205.87688:38854	[M+H]+			yes	0.0090265	-10.83	0.0043242	-9.3105	Organic acid	Quinoline carboxylic acids	Quinoline carboxylic acids	Quinoline carboxylic acids	4,6-Dihydroxy-2-quinolinecarboxylic acid	2-hydroxy-4-quinolone-3-carboxylic acid	Xanthurenic acid	HMDB=HMDB0033528,KNApSAcK=C00001540,ChEBI=CHEBI:2195,FooDB=FDB011585,PubChem=440752,UNPD=UNPD156697	ChEBI=CHEBI:74804	HMDB=HMDB0000881,ChEBI=CHEBI:10072;CHEBI:71201,SMPDB=PW_C000703,YMDB=YMDB01807,FooDB=FDB022297,BMDB=BMDB00881,Urine=HMDB0000881,Feces=HMDB0000881,Serum=HMDB0000881,PubChem=25203183;5699,UNPD=UNPD73011	C10H7NO4	C10H7NO4	C10H7NO4	9.5129	9.1266	9.096
Negative	207.045	14.19	58.9075:220 72.96996:1033 81.01213:55 85.26912:63 97.1366:113 98.74559:69 100.97821:92 102.99873:140 114.98682:118 119.08667:73 126.93634:63 131.05949:211 132.92073:682 142.97536:61 170.66151:53 186.90054:61	[M-H]-			yes	0.0034062	-8.6714	0.00057117	-9.4787	Fatty acid	Medium-chain fatty acids	Dipeptides	Dipeptides	Dihydrolipoate	Cysteinyl-Serine	Serylcysteine	HMDB=HMDB0012210,ChEBI=CHEBI:18047;CHEBI:30316;CHEBI:45230;CHEBI:30318;CHEBI:83093,DrugBank=DB03760,SMPDB=PW_C007757,FooDB=FDB028855,STOFF=STOFF_9583,BMDB=BMDB12210,LipidMAPS=LMFA01130003,PubChem=25244689;421,PlantCyc=CPD-296	HMDB=HMDB0028784,ChEBI=CHEBI:73462	HMDB=HMDB0029036	C8H16O2S2	C6H12N2O4S	C6H12N2O4S	7.7055	7.4493	7.0024
Negative	207.83	13.65	58.97011:61 73.08961:130 101.14098:52 117.85553:139 119.00919:180 119.87036:63 125.85454:516 127.74654:957 132.9021:94 145.90172:3523 179.95341:97	[M-H]-		yes	yes	0.057538	-1.9391	9.3082e-05	-10.478	No annotation
Negative	209.081	19.96	127.47852:173 173.2262:7356	[M-H]-				0.64152	0.94506	0.37511	-1.7857	Other	Methoxyphenols	Alkyl-phenylketones	Prenylated hydroquinones	Sinapyl alcohol	3-Methyl-1-(2,4,6-trihydroxyphenyl)-1-butanone	4-(3-methylbut-2-en-1-yl)benzene-1,2,3,5-tetrol	HMDB=HMDB0013070,KNApSAcK=C00002778;C00034298,ChEBI=CHEBI:28813;CHEBI:64557,FooDB=FDB029281;FDB031178,NANPDB=NANPDB_6780,PubChem=5280507,PlantCyc=SINAPYL-ALCOHOL,UNPD=UNPD121517;UNPD14365;UNPD222025	HMDB=HMDB0033798,ChEBI=CHEBI:15951,FooDB=FDB011960,PubChem=441269,PlantCyc=3-METHYL-1-246-TRIHYDROXYPHENYLBUTAN,UNPD=UNPD81893	HMDB=HMDB0129255	C11H14O4	C11H14O4	C11H14O4	6.793	6.7614	6.5029
Negative	211.083	17.71	148.43102:61 151.26149:6015 152.06013:140	[M-H]-			yes	0.0069362	-8.2488	0.00052806	-8.5786	Peptide	Peptides	Dipeptides	Benzoins	Histidinyl-Glycine	Glycyl-Histidine	Benzoin	HMDB=HMDB0028885,ChEBI=CHEBI:73930,Feces=HMDB0028885	HMDB=HMDB0028843,ChEBI=CHEBI:73515	HMDB=HMDB0032039,ChEBI=CHEBI:17682;CHEBI:51509;CHEBI:51510,YMDB=YMDB00336,T3DB=T3D4906,FooDB=FDB008742;FDB009015;FDB012830,STOFF=STOFF_5499,UNPD=UNPD60752	C8H12N4O3	C8H12N4O3	C14H12O2	6.7746	6.5383	5.4583
Negative	212.075	7.61	65.07561:1260 65.76264:2227 92.48099:4206 93.29851:460 134.24585:365 136.44301:413 141.2914:1205 146.28685:10478 147.1266:158 148.35402:24507 149.44998:292 156.1935:2057 156.90599:272	[M-H]-			yes	0.00023831	-10.729	3.6437e-05	-12.577	Other	4,5-disubstituted thiazoles	4,5-disubstituted thiazoles	Benzenesulfonamides	2-(4-Methyl-5-thiazolyl)ethyl butanoate	2-(4-Methyl-5-thiazolyl)ethyl isobutyrate	N-Butylbenzenesulfonamide	HMDB=HMDB0032418,FooDB=FDB009861	HMDB=HMDB0032422,FooDB=FDB009865	KNApSAcK=C00041687,ChEBI=CHEBI:44237,DrugBank=DB02055,T3DB=T3D4810,STOFF=STOFF_764,UNPD=UNPD43555	C10H15NO2S	C10H15NO2S	C10H15NO2S	4.8167	4.8167	4.6974
Positive	212.095	11.68	70.04116:129 72.09975:2110 90.00029:5146 123.0847:2506	[M+H]+			yes	0.0020227	4.8779	0.0067472	3.9706	Other	Phenylpropanoic acids	Tyrosine and derivatives	Pyrimidine 2',3'-dideoxyribonucleosides	Methyldopa	3-Methoxytyrosine	Zalcitabine	HMDB=HMDB0011754,ChEBI=CHEBI:61058,DrugBank=DB00968,T3DB=T3D3577,FooDB=FDB028425,STOFF=STOFF_3381,BMDB=BMDB11754,Urine=HMDB0011754	HMDB=HMDB0001434;HMDB0060747,ChEBI=CHEBI:82913;CHEBI:133668,T3DB=T3D4297,FooDB=FDB022620,BMDB=BMDB01434,Urine=HMDB0001434;HMDB0060747,CSF=HMDB0001434,Serum=HMDB0001434;HMDB0060747,PubChem=25273143;9307,PlantCyc=CPD-11496,UNPD=UNPD162878	HMDB=HMDB0015078,ChEBI=CHEBI:10101,DrugBank=DB00943,SMPDB=PW_C009386,T3DB=T3D4719,STOFF=STOFF_8311,Urine=HMDB0015078,Serum=HMDB0015078,PubChem=24066	C10H13NO4	C10H13NO4	C9H13N3O3	8.1602	8.1579	7.8063
Negative	212.91	15.15	118.88559:3652	[M-H]-			yes	0.00051166	4.8943	0.4487	1.8633	Other	Organic disulfides			Dimexano			ChEBI=CHEBI:82239			C4H6O2S4			4.7767
Negative	214.048	14.47	79.13042:1419 140.03062:12356 152.93805:13130 196.28386:56	[M-H]-			yes	1.4647e-05	8.0996	0.002478	9.092	Phospholipid	Glycerophosphoethanolamines	Organic phosphoramides	Furanoquinolines	sn-glycero-3-Phosphoethanolamine	Glycerylphosphorylethanolamine	Robustine;(-)-Rutacridone	HMDB=HMDB0059660,ChEBI=CHEBI:16929;CHEBI:52330;CHEBI:57952,DrugBank=DB03484,YMDB=YMDB00757,PubChem=70678815;25200464;5459861;444183,PlantCyc=L-1-GLYCEROPHOSPHORYLETHANOL-AMINE,UNPD=UNPD37320	HMDB=HMDB0000114,SMPDB=PW_C000072,FooDB=FDB021895,BMDB=BMDB00114,ECMDB=ECMDB00114	KNApSAcK=C00002195,ChEBI=CHEBI:8883,UNPD=UNPD36273	C5H14NO6P	C5H14NO6P	C12H9NO3	9.2777	8.3785	7.1549
Positive	214.083	14.4	72.10365:1764 77.00931:1233 85.08528:116 88.01791:169 95.16154:703 100.21622:60 126.99739:108 135.14043:62 140.89861:82532 141.96561:99 146.84485:92 157.90512:339775 160.22404:53 173.10588:176 179.08008:98 184.13811:51 194.76257:74 196.30788:140 197.2305:98 198.81512:279 208.67073:93	[M+H]+			yes	0.0022573	-4.3944	0.00025969	-5.2299	Other	4,5-disubstituted thiazoles	Benzenesulfonamides	4,5-disubstituted thiazoles	2-(4-Methyl-5-thiazolyl)ethyl isobutyrate	N-Butylbenzenesulfonamide	2-(4-Methyl-5-thiazolyl)ethyl butanoate	HMDB=HMDB0032422,FooDB=FDB009865	KNApSAcK=C00041687,ChEBI=CHEBI:44237,DrugBank=DB02055,T3DB=T3D4810,STOFF=STOFF_764,UNPD=UNPD43555	HMDB=HMDB0032418,FooDB=FDB009861	C10H15NO2S	C10H15NO2S	C10H15NO2S	6.9167	6.8971	6.8419
Negative	215.032	10.91	179.0316:173	[M-H]-			yes	0.00017298	9.7599	0.0071859	10.331	Other	5-methoxypsoralens	8-methoxypsoralens	Isocoumarins and derivatives	Bergapten	Methoxsalen	4-hydroxy-7-methyl-5H-furo[2,3-g]isochromen-5-one	HMDB=HMDB0030637,KNApSAcK=C00000575,ChEBI=CHEBI:18293,FooDB=FDB002542,NANPDB=NANPDB_2999;NANPDB_4182;NANPDB_4443;NANPDB_4444;NANPDB_4445;NANPDB_4446;NANPDB_4485,PubChem=2355,PlantCyc=5-METHOXYFURANOCOUMARIN,UNPD=UNPD12397	HMDB=HMDB0014693,KNApSAcK=C00000576,ChEBI=CHEBI:18358,DrugBank=DB00553,T3DB=T3D0836,FooDB=FDB012474,NANPDB=NANPDB_3624;NANPDB_4437;NANPDB_4438;NANPDB_4439;NANPDB_4440;NANPDB_4467;NANPDB_4612,STOFF=STOFF_8276,Urine=HMDB0014693,Serum=HMDB0014693,UNPD=UNPD134852	HMDB=HMDB0138947	C12H8O4	C12H8O4	C12H8O4	6.8301	6.8301	6.6296
Positive	216.063	14.46	72.12161:119 89.97617:54 97.06296:1735 108.07495:160 111.90326:119 126.01901:2174 127.13397:137 128.23157:70 138.06438:283 140.01128:73 142.13123:64 143.05193:158 144.17235:77 150.0984:871 153.98134:113 156.00986:1356 159.20232:107 159.94165:565 180.19923:332 186.1465:281 188.22832:58 197.96941:7653	[M+H]+			yes	0.00047121	10.787	0.0052115	10.125	Phospholipid	Glycerophosphoethanolamines	Organic phosphoramides	Furanoquinolines	sn-glycero-3-Phosphoethanolamine	Glycerylphosphorylethanolamine	Robustine;(-)-Rutacridone	HMDB=HMDB0059660,ChEBI=CHEBI:16929;CHEBI:52330;CHEBI:57952,DrugBank=DB03484,YMDB=YMDB00757,PubChem=70678815;25200464;5459861;444183,PlantCyc=L-1-GLYCEROPHOSPHORYLETHANOL-AMINE,UNPD=UNPD37320	HMDB=HMDB0000114,SMPDB=PW_C000072,FooDB=FDB021895,BMDB=BMDB00114,ECMDB=ECMDB00114	KNApSAcK=C00002195,ChEBI=CHEBI:8883,UNPD=UNPD36273	C5H14NO6P	C5H14NO6P	C12H9NO3	8.6326	7.6278	7.1443
Negative	218.096	2.42	70.95135:87 87.994:10008 127.93228:212 146.04781:2286 146.86015:112	[M-H]-			yes	0.0019266	-12.907	2.9067e-05	-13.16	Other	Secondary alcohols	6-alkylaminopurines	Naphthalenes	Pantothenic acid	Cis-zeatin	N-Phenyl-2-naphthylamine	HMDB=HMDB0000210;HMDB0062717,KNApSAcK=C00001550,ChEBI=CHEBI:16454;CHEBI:29032;CHEBI:46905;CHEBI:7916,DrugBank=DB01783,SMPDB=PW_C000136,YMDB=YMDB00203,FooDB=FDB008322;FDB011817;FDB030151,BMDB=BMDB00210,Urine=HMDB0000210;HMDB0062717,Saliva=HMDB0000210,Feces=HMDB0000210,ECMDB=ECMDB00210,CSF=HMDB0000210,Serum=HMDB0000210;HMDB0062717,PubChem=167945;6613;988,PlantCyc=PANTOTHENATE,UNPD=UNPD178642;UNPD20…	HMDB=HMDB0012204,KNApSAcK=C00000091;C00007325,ChEBI=CHEBI:16522;CHEBI:46570;CHEBI:15333,FooDB=FDB002239;FDB028850;FDB031213,BMDB=BMDB12204,PubChem=688597;449093,PlantCyc=CPD-4441;CPD-4210,UNPD=UNPD26930;UNPD34796	HMDB=HMDB0032865,KNApSAcK=C00039881,ChEBI=CHEBI:34877,FooDB=FDB010843,UNPD=UNPD178186	C9H17NO5	C10H13N5O	C16H13N	8.6238	8.2309	6.5713
Negative	218.103	15.56	88.56705:2645 146.35207:548	[M-H]-			yes	0.0053876	-9.964	0.00067146	-10.041	Other	Secondary alcohols	6-alkylaminopurines	Naphthalenes	Pantothenic acid	Cis-zeatin	N-Phenyl-2-naphthylamine	HMDB=HMDB0000210;HMDB0062717,KNApSAcK=C00001550,ChEBI=CHEBI:16454;CHEBI:29032;CHEBI:46905;CHEBI:7916,DrugBank=DB01783,SMPDB=PW_C000136,YMDB=YMDB00203,FooDB=FDB008322;FDB011817;FDB030151,BMDB=BMDB00210,Urine=HMDB0000210;HMDB0062717,Saliva=HMDB0000210,Feces=HMDB0000210,ECMDB=ECMDB00210,CSF=HMDB0000210,Serum=HMDB0000210;HMDB0062717,PubChem=167945;6613;988,PlantCyc=PANTOTHENATE,UNPD=UNPD178642;UNPD20…	HMDB=HMDB0012204,KNApSAcK=C00000091;C00007325,ChEBI=CHEBI:16522;CHEBI:46570;CHEBI:15333,FooDB=FDB002239;FDB028850;FDB031213,BMDB=BMDB12204,PubChem=688597;449093,PlantCyc=CPD-4441;CPD-4210,UNPD=UNPD26930;UNPD34796	HMDB=HMDB0032865,KNApSAcK=C00039881,ChEBI=CHEBI:34877,FooDB=FDB010843,UNPD=UNPD178186	C9H17NO5	C10H13N5O	C16H13N	5.2093	4.9783	4.7423
Positive	220.111	2.42	72.00567:1249 90.00047:6446 94.89166:65 97.97067:150 113.09628:126 115.9976:1437 124.13191:239 137.03207:152 141.959:276 156.07072:293 166.00204:421 183.99037:7442 202.04842:18480	[M+H]+			yes	0.0053805	-9.9583	1.5604e-05	-10.002	Other	Secondary alcohols	6-alkylaminopurines	Naphthalenes	Pantothenic acid	Cis-zeatin	N-Phenyl-2-naphthylamine	HMDB=HMDB0000210;HMDB0062717,KNApSAcK=C00001550,ChEBI=CHEBI:16454;CHEBI:29032;CHEBI:46905;CHEBI:7916,DrugBank=DB01783,SMPDB=PW_C000136,YMDB=YMDB00203,FooDB=FDB008322;FDB011817;FDB030151,BMDB=BMDB00210,Urine=HMDB0000210;HMDB0062717,Saliva=HMDB0000210,Feces=HMDB0000210,ECMDB=ECMDB00210,CSF=HMDB0000210,Serum=HMDB0000210;HMDB0062717,PubChem=167945;6613;988,PlantCyc=PANTOTHENATE,UNPD=UNPD178642;UNPD20…	HMDB=HMDB0012204,KNApSAcK=C00000091;C00007325,ChEBI=CHEBI:16522;CHEBI:46570;CHEBI:15333,FooDB=FDB002239;FDB028850;FDB031213,BMDB=BMDB12204,PubChem=688597;449093,PlantCyc=CPD-4441;CPD-4210,UNPD=UNPD26930;UNPD34796	HMDB=HMDB0032865,KNApSAcK=C00039881,ChEBI=CHEBI:34877,FooDB=FDB010843,UNPD=UNPD178186	C9H17NO5	C10H13N5O	C16H13N	8.6832	8.0018	6.6943
Negative	223.02	17.4	138.82207:277 141.21484:221604 141.94547:3334 163.32883:82	[M-H]-				0.37632	-1.2665	0.37511	3.3461	Other	Naphthalenes	Naphthalenes		2-naphthyl dihydrogen phosphate	1-naphthyl dihydrogen phosphate		ChEBI=CHEBI:91043	ChEBI=CHEBI:75442		C10H9O4P	C10H9O4P		6.7975	6.7975
Negative	225.89	13.71	91.89436:102 123.96956:74 135.80772:5602 137.86174:65 208.1353:68	[M-H]-			yes	0.00057151	-10.102	0.00013845	-10.57	No annotation
Negative	226.978	14.76	112.92046:7986	[M-H]-			yes	0.0014273	12.028	0.013428	11.187	No annotation
Negative	227.202	5.17	209.19807:193	[M-H]-			yes	0.00045601	-10.334	0.00051041	-10.608	Fatty acid	Long-chain fatty acids	Long-chain fatty acids	Medium-chain fatty acids	Myristic acid	12-Methyltridecanoic acid	2,6,10-Trimethylundecanoic acid	HMDB=HMDB0000806,KNApSAcK=C00001228,ChEBI=CHEBI:28875;CHEBI:30807,DrugBank=DB08231,SMPDB=PW_C000643,YMDB=YMDB00679,T3DB=T3D4599,FooDB=FDB002890;FDB031009,NANPDB=NANPDB_719;NANPDB_2333;NANPDB_4158;NANPDB_4840,STOFF=STOFF_101,BMDB=BMDB00806,LipidMAPS=LMFA01010014;LMFA01010044,Urine=HMDB0000806,Saliva=HMDB0000806,Feces=HMDB0000806,CSF=HMDB0000806,Serum=HMDB0000806,PubChem=11005,PlantCyc=CPD-7836,UNP…	HMDB=HMDB0031072,ChEBI=CHEBI:43722;CHEBI:84193,FooDB=FDB003074,LipidMAPS=LMFA01020007,Feces=HMDB0031072,UNPD=UNPD70622	HMDB=HMDB0002221,FooDB=FDB022915,BMDB=BMDB02221,LipidMAPS=LMFA01020285,UNPD=UNPD27276;UNPD70843	C14H28O2	C14H28O2	C14H28O2	9.2143	9.2103	8.7976
Positive	227.976	13.7	114.10008:274 141.10986:89 145.97357:95 157.97359:59 163.78944:111 170.01166:54 172.02132:551 186.85765:5338 203.92378:206 204.61411:1687 209.06517:90 227.94061:114	[M+H]+			yes	9.6683e-05	-9.7262	0.0002496	-7.9519	No annotation
Positive	236.106	14.24	99.23799:196 116.88728:77 158.89514:177135 205.0719:133 214.20456:122 215.61737:106 217.7515:1592 218.76656:12479 234.77734:101	[M+H]+			yes	0.00038467	-12.799	1.0008e-05	-13.101	Other	1-benzylquinolines	Tetralins	N-acyl-alpha-hexosamines	1-(phenylmethyl)-4-quinolinone	2-(pyridin-4-ylmethylidene)-3,4-dihydronaphthalen-1-one	methyl N-acetyl-alpha-D-galactosaminide	ChEBI=CHEBI:111462	ChEBI=CHEBI:116629	ChEBI=CHEBI:44096;CHEBI:60314,DrugBank=DB04426	C16H13NO	C16H13NO	C9H17NO6	6.0494	5.9949	5.8467
Negative	239.077	18.26	176.8278:71 178.32072:490 179.20848:1888	[M-H]-			yes	0.0012218	-8.4868	8.1254e-05	-9.0789	Carbohydrate	Octoses	C-glycosyl compounds	Flavanones	D-threo-L-galacto-octose	D-glycero-L-galacto-Octulose	7-Hydroxyflavanone	ChEBI=CHEBI:37811	HMDB=HMDB0029954,FooDB=FDB012594,UNPD=UNPD128710	KNApSAcK=C00008126,ChEBI=CHEBI:34483;CHEBI:41888;CHEBI:48020,DrugBank=DB04274,LipidMAPS=LMPK12140018,UNPD=UNPD75834;UNPD96495	C8H16O8	C8H16O8	C15H12O3	6.3745	6.2985	6.2914
Positive	241.061	0.81	158.92146:845 180.95937:15096	[M+H]+				0.099896	-1.0933	0.034423	-0.61412	Other	Gamma-keto acids and derivatives	Methoxyphenols	Benzenoids	(1S,6R)-2-succinyl-6-hydroxycyclohexa-2,4-diene-1-carboxylic acid	3-(4-hydroxy-3,5-dimethoxyphenyl)oxirane-2-carboxylic acid	bentazone	ChEBI=CHEBI:1277;CHEBI:11656;CHEBI:39564;CHEBI:57272;CHEBI:58689,DrugBank=DB06864,FooDB=FDB030089,ECMDB=ECMDB20002,PubChem=25246102;5287432,PlantCyc=CPD-9923	HMDB=HMDB0135752	ChEBI=CHEBI:3018,T3DB=T3D4479,STOFF=STOFF_512	C11H12O6	C11H12O6	C10H12N2O3S	7.3603	7.3587	7.3398
Negative	241.091	18.26	131.45888:1090 141.1851:53 156.33589:245 173.26865:31260 174.13895:103 178.16069:94	[M-H]-				0.12699	-5.0575	0.07565	-5.4812	Nucleoside	Pyrimidine 2'-deoxyribonucleosides	Dipeptides	Dipeptides	Thymidine	Histidinyl-Serine	Serylhistidine	HMDB=HMDB0000273;HMDB0015394,KNApSAcK=C00019698,ChEBI=CHEBI:17748;CHEBI:53527;CHEBI:63624,DrugBank=DB01265;DB04485,SMPDB=PW_C000187,YMDB=YMDB00507,FooDB=FDB012757;FDB031201,NANPDB=NANPDB_2164,STOFF=STOFF_5173;STOFF_6945,BMDB=BMDB00273,Urine=HMDB0000273;HMDB0015394,Saliva=HMDB0000273,Feces=HMDB0000273,ECMDB=ECMDB00273,CSF=HMDB0000273,Serum=HMDB0000273;HMDB0015394,PubChem=5789;1134,PlantCyc=THYMIDI…	HMDB=HMDB0028894,ChEBI=CHEBI:74056	HMDB=HMDB0029041,ChEBI=CHEBI:73651	C10H14N2O5	C9H14N4O4	C9H14N4O4	7.055	6.9137	6.9137
Negative	241.217	5.1	184.23918:74 223.32449:339 225.10973:133	[M-H]-			yes	0.00055454	-9.989	0.00010748	-10.226	Fatty acid	Long-chain fatty acids	Long-chain fatty acids	Long-chain fatty acids	Pentadecanoic acid	13-Methylmyristic acid	anteisopentadecanoic acid	HMDB=HMDB0000826,KNApSAcK=C00007423,ChEBI=CHEBI:42504;CHEBI:78795,FooDB=FDB010033,BMDB=BMDB00826,LipidMAPS=LMFA01010015;LMFA01010045,Saliva=HMDB0000826,Feces=HMDB0000826,Serum=HMDB0000826,PubChem=13849,UNPD=UNPD166620	HMDB=HMDB0061707,ChEBI=CHEBI:39250;CHEBI:70826,LipidMAPS=LMFA01020009,Feces=HMDB0061707,UNPD=UNPD74101	ChEBI=CHEBI:39251,LipidMAPS=LMFA01020008,PubChem=17903416;21672,UNPD=UNPD37829	C15H30O2	C15H30O2	C15H30O2	8.3209	8.2888	7.8721
Negative	243.062	15.35	110.43825:833 111.50467:353 140.21851:282 145.17506:64 152.18385:510 153.35623:134 182.08299:52 225.09842:57	[M-H]-			yes	0.0014506	-9.1896	0.025767	-8.4459	Nucleoside	Nucleoside and nucleotide analogues	Pyrimidine nucleosides	Furanoid fatty acids	Pseudouridine	Uridine	(2E,11Z)-Wyerone acid	HMDB=HMDB0000767,KNApSAcK=C00001508,ChEBI=CHEBI:17802,YMDB=YMDB01644,FooDB=FDB014724;FDB031139,BMDB=BMDB00767,Urine=HMDB0000767,Feces=HMDB0000767,Serum=HMDB0000767,PubChem=15047,PlantCyc=CPD-497,UNPD=UNPD140548;UNPD168540	HMDB=HMDB0000296,KNApSAcK=C00019674,ChEBI=CHEBI:16704;CHEBI:68346,DrugBank=DB02745,SMPDB=PW_C000202,YMDB=YMDB00127,FooDB=FDB007411,NANPDB=NANPDB_4149,BMDB=BMDB00296,Urine=HMDB0000296,Feces=HMDB0000296,ECMDB=ECMDB00296,CSF=HMDB0000296,Serum=HMDB0000296,PubChem=6029,PlantCyc=URIDINE,UNPD=UNPD108011;UNPD169274;UNPD188558;UNPD79602;UNPD211663	HMDB=HMDB0030946,KNApSAcK=C00001300,ChEBI=CHEBI:10046,FooDB=FDB002922;FDB002923,UNPD=UNPD102611;UNPD107515;UNPD213914	C9H12N2O6	C9H12N2O6	C14H12O4	7.8176	7.7899	7.649
Positive	243.115	0.66	113.05493:1832	[M+H]+			yes	0.00091208	-8.7987	5.6618e-05	-9.124	Nucleoside	Nucleoside and nucleotide analogues	Alkyl-phenylketones	Alkyl-phenylketones	Stavudine	Hydroxykynurenine	5-Hydroxykynurenine	HMDB=HMDB0014787,ChEBI=CHEBI:63581,DrugBank=DB00649,SMPDB=PW_C009132,T3DB=T3D4772,STOFF=STOFF_787,Urine=HMDB0014787,Serum=HMDB0014787	HMDB=HMDB0000732;HMDB0011631,KNApSAcK=C00007443,ChEBI=CHEBI:17380;CHEBI:1547;CHEBI:58125,SMPDB=PW_C007219,YMDB=YMDB00105,FooDB=FDB022210;FDB028330,BMDB=BMDB00732;BMDB11631,Urine=HMDB0000732;HMDB0011631,Serum=HMDB0000732;HMDB0011631,PubChem=51377238;49791998;25244175;11811;89,PlantCyc=3-HYDROXY-L-KYNURENINE,UNPD=UNPD179226	HMDB=HMDB0012819,ChEBI=CHEBI:36408;CHEBI:2076;CHEBI:62624,SMPDB=PW_C008092,FooDB=FDB029180,BMDB=BMDB12819,Feces=HMDB0012819,PubChem=9548587;440745	C10H12N2O4	C10H12N2O4	C10H12N2O4	8.5755	8.4032	8.2767
Negative	249.024	5.13	93.03378:792 154.94644:583 229.14485:60	[M-H]-			yes	0.000554	-11.357	9.6805e-05	-11.782	Benzenoid	Benzenesulfonyl compounds	Hydropyridines	Methoxyphenols	4,4'-sulfonyldiphenol	nicotine blue(2-)	2-amino-5-[(4-hydroxy-3-methoxyphenyl)methylidene]-4-thiazolone	ChEBI=CHEBI:34372,STOFF=STOFF_4623	ChEBI=CHEBI:64998;CHEBI:65011;CHEBI:80355,PubChem=57339255;54693777	ChEBI=CHEBI:94179	C12H10O4S	C10H6N2O6	C11H10N2O3S	7.2535	6.8518	6.7621
Positive	251.178	4.69	115.10471:138 116.95198:1644 120.07008:51 135.07457:160 175.05937:818 192.99083:192 227.88225:53 233.06554:363	[M+H]+			yes	0.0016639	-8.5998	7.9863e-05	-9.0046	Amino acid	Alpha amino acid amides	Benzoic acid esters	Phenoxy compounds	3-Hydroxylidocaine	naepaine	Rivastigmine	HMDB=HMDB0060655,ChEBI=CHEBI:80567,SMPDB=PW_C040576,Urine=HMDB0060655,Serum=HMDB0060655,PubChem=161824	ChEBI=CHEBI:135021	HMDB=HMDB0015124,ChEBI=CHEBI:8874;CHEBI:64363,DrugBank=DB00989,STOFF=STOFF_1327,Urine=HMDB0015124,Serum=HMDB0015124	C14H22N2O2	C14H22N2O2	C14H22N2O2	8.4796	7.9932	7.8278
Positive	252.1	0.86	156.10928:91 216.06389:241 234.01772:5450	[M+H]+			yes	0.0056692	-8.9505	0.00075587	-3.9567	Carbohydrate	Sugar acids and derivatives	Purine 2'-deoxyribonucleosides	5'-deoxyribonucleosides	Muramic acid	Deoxyadenosine	5'-Deoxyadenosine	HMDB=HMDB0003254,ChEBI=CHEBI:7027;CHEBI:44312;CHEBI:47969,FooDB=FDB023131,BMDB=BMDB03254,UNPD=UNPD63102;UNPD69743;UNPD98180	HMDB=HMDB0000101,KNApSAcK=C00019281,ChEBI=CHEBI:17256,SMPDB=PW_C000068,YMDB=YMDB00503,T3DB=T3D4958,FooDB=FDB021894,BMDB=BMDB00101,Urine=HMDB0000101,ECMDB=ECMDB00101,Serum=HMDB0000101,PubChem=13730;636,PlantCyc=DEOXYADENOSINE,UNPD=UNPD148912;UNPD177483	HMDB=HMDB0001983,ChEBI=CHEBI:17319,SMPDB=PW_C001329,YMDB=YMDB00150,FooDB=FDB022781,BMDB=BMDB01983,Urine=HMDB0001983,Serum=HMDB0001983,PubChem=439182,PlantCyc=CH33ADO	C9H17NO7	C10H13N5O3	C10H13N5O3	8.1515	8.0732	8.0687
Positive	252.107	14.56	198.1826:63 216.22649:375 234.09044:41209	[M+H]+			yes	0.0011988	8.0905	0.00064147	10.293	Nucleoside	Purine 2'-deoxyribonucleosides	5'-deoxyribonucleosides	Sugar acids and derivatives	Deoxyadenosine	5'-Deoxyadenosine	Muramic acid	HMDB=HMDB0000101,KNApSAcK=C00019281,ChEBI=CHEBI:17256,SMPDB=PW_C000068,YMDB=YMDB00503,T3DB=T3D4958,FooDB=FDB021894,BMDB=BMDB00101,Urine=HMDB0000101,ECMDB=ECMDB00101,Serum=HMDB0000101,PubChem=13730;636,PlantCyc=DEOXYADENOSINE,UNPD=UNPD148912;UNPD177483	HMDB=HMDB0001983,ChEBI=CHEBI:17319,SMPDB=PW_C001329,YMDB=YMDB00150,FooDB=FDB022781,BMDB=BMDB01983,Urine=HMDB0001983,Serum=HMDB0001983,PubChem=439182,PlantCyc=CH33ADO	HMDB=HMDB0003254,ChEBI=CHEBI:7027;CHEBI:44312;CHEBI:47969,FooDB=FDB023131,BMDB=BMDB03254,UNPD=UNPD63102;UNPD69743;UNPD98180	C10H13N5O3	C10H13N5O3	C9H17NO7	8.5185	8.514	8.5119
Positive	252.108	19.93	216.19243:811 234.1335:31607 234.90198:237	[M+H]+			yes	0.0027207	-10.48	0.00025827	-8.8673	Nucleoside	Purine 2'-deoxyribonucleosides	5'-deoxyribonucleosides	Sugar acids and derivatives	Deoxyadenosine	5'-Deoxyadenosine	Muramic acid	HMDB=HMDB0000101,KNApSAcK=C00019281,ChEBI=CHEBI:17256,SMPDB=PW_C000068,YMDB=YMDB00503,T3DB=T3D4958,FooDB=FDB021894,BMDB=BMDB00101,Urine=HMDB0000101,ECMDB=ECMDB00101,Serum=HMDB0000101,PubChem=13730;636,PlantCyc=DEOXYADENOSINE,UNPD=UNPD148912;UNPD177483	HMDB=HMDB0001983,ChEBI=CHEBI:17319,SMPDB=PW_C001329,YMDB=YMDB00150,FooDB=FDB022781,BMDB=BMDB01983,Urine=HMDB0001983,Serum=HMDB0001983,PubChem=439182,PlantCyc=CH33ADO	HMDB=HMDB0003254,ChEBI=CHEBI:7027;CHEBI:44312;CHEBI:47969,FooDB=FDB023131,BMDB=BMDB03254,UNPD=UNPD63102;UNPD69743;UNPD98180	C10H13N5O3	C10H13N5O3	C9H17NO7	8.5266	8.522	8.5084
Negative	253.137	7.25	191.27899:82 232.82153:163	[M-H]-			yes	0.002703	-9.9684	0.021804	-2.2875	Other	Macrolides and analogues	1,2-dioxanes	L-alpha-amino acids	Aspergillide A	Steperoxide B	(S)-Argpyrimidine	KNApSAcK=C00048614;C00048615,ChEBI=CHEBI:65450;CHEBI:65451,UNPD=UNPD147730;UNPD183074;UNPD46619	ChEBI=CHEBI:67710;CHEBI:69047;CHEBI:69051,UNPD=UNPD155971;UNPD23312;UNPD86249	HMDB=HMDB0037180,ChEBI=CHEBI:59962,FooDB=FDB016178	C14H22O4	C14H22O4	C11H18N4O3	6.2101	6.1945	6.1762
Negative	253.217	5.06	235.25311:880	[M-H]-			yes	0.0042689	-12.832	0.0044346	-9.9051	Fatty acid	Long-chain fatty acids	Long-chain fatty acids	Long-chain fatty acids	(E)-11-Hexadecenoic acid	(E)-6-Hexadecenoic acid	Hypogeic acid	HMDB=HMDB0037647,ChEBI=CHEBI:35464,FooDB=FDB016763,LipidMAPS=LMFA01030261;LMFA01030262,UNPD=UNPD117117;UNPD187150;UNPD215878	HMDB=HMDB0031053,ChEBI=CHEBI:76197;CHEBI:76244,FooDB=FDB003053,LipidMAPS=LMFA01030267;LMFA01031082,UNPD=UNPD115479;UNPD156973;UNPD217995	HMDB=HMDB0002186,ChEBI=CHEBI:35465;CHEBI:82730,FooDB=FDB004011;FDB005579,BMDB=BMDB02186,LipidMAPS=LMFA01030055;LMFA01030808,Serum=HMDB0002186,UNPD=UNPD176983;UNPD199017;UNPD213268	C16H30O2	C16H30O2	C16H30O2	9.242	9.242	9.242
Positive	257.034	0.82	120.93651:71 124.17868:124 161.00087:193 176.20673:108 220.73537:78 238.1422:57 238.98346:92	[M+H]+			yes	0.0007489	-10.102	0.00067975	-10.398	Other	Monoalkyl phosphates	Monoalkyl phosphates	Benzoic acids and derivatives	valienol 1-phosphate(2-)	validone 7-phosphate(2-)	N-[bis(methylthio)methylideneamino]-4-hydroxybenzamide	ChEBI=CHEBI:91252;CHEBI:128459,PubChem=50994406;50994405	ChEBI=CHEBI:111523;CHEBI:131949,PubChem=25246169;25203694	ChEBI=CHEBI:107855	C7H13O8P	C7H13O8P	C10H12N2O2S2	6.5024	6.3299	6.263
Positive	258.11	18.61	104.56833:26783 125.5011:55 184.34624:164 199.08414:72 240.26628:191	[M+H]+			yes	0.007313	-9.4598	9.6008e-05	-10.27	Peptide	Dipeptides	Pyrimidine nucleosides	Aryl-phenylketones	Pyro-L-glutaminyl-L-glutamine	5-Methylcytidine	Tolmetin	HMDB=HMDB0039229,ChEBI=CHEBI:88956;CHEBI:133739,FooDB=FDB018762,Saliva=HMDB0039229,UNPD=UNPD31323;UNPD61172	HMDB=HMDB0000982,ChEBI=CHEBI:20607,FooDB=FDB022351,BMDB=BMDB00982,Urine=HMDB0000982,Feces=HMDB0000982,Serum=HMDB0000982,UNPD=UNPD196780	HMDB=HMDB0014643,ChEBI=CHEBI:71941;CHEBI:72213,DrugBank=DB00500,SMPDB=PW_C009003,STOFF=STOFF_1051,Urine=HMDB0014643,Serum=HMDB0014643	C10H15N3O5	C10H15N3O5	C15H15NO3	5.0303	5.0303	4.9773
Negative	263.04	5.66	93.03506:345 106.95113:259 154.85641:314 168.99072:238 235.08199:64	[M-H]-			yes	0.0012904	-9.9182	0.00016715	-10.366	Other	Hydantoins	Coumarins and derivatives	Naphthalenes	furagin	Necatorine	(1R,2R)-3-[(1,2-Dihydro-2-hydroxy-1-naphthalenyl)thio]-2-oxopropanoic acid	ChEBI=CHEBI:131714	HMDB=HMDB0039035,FooDB=FDB018532,UNPD=UNPD96258	ChEBI=CHEBI:33997,PubChem=11954050	C10H8N4O5	C15H8N2O3	C13H12O4S	7.3997	7.2945	7.0677
Negative	264.934	16.16	113.04903:6428 168.94708:11543 170.96162:43838 191.91577:83	[M-H]-			yes	0.00037891	12.212	0.00014586	13.232	Other	Aryl thioethers			2-[(2-sulfanylidene-3H-1,3,4-thiadiazol-5-yl)thio]butanedioic acid			ChEBI=CHEBI:111388			C6H6N2O4S3			6.6194
Positive	265.096	13.71	113.08257:144 130.67596:52 177.04669:216 188.97867:156 228.98604:120 235.53532:129 236.49516:106 241.84016:82 244.19287:84 247.1179:151	[M+H]+			yes	0.0019145	-5.0359	0.00026315	-8.9081	Organic acid	Pyrimidinecarboxylic acids	Harmala alkaloids	Nitrobenzenes	2-(5-methyl-3-oxo-1H-pyrazol-2-yl)-6-oxo-1H-pyrimidine-5-carboxylic acid ethyl ester	Perlolyrine	N-[2-[(4-methyl-1,2,5-oxadiazol-3-yl)oxy]ethyl]-4-nitroaniline	ChEBI=CHEBI:119797	HMDB=HMDB0030327,KNApSAcK=C00001756,ChEBI=CHEBI:69444,FooDB=FDB002170,UNPD=UNPD111730	ChEBI=CHEBI:122031	C11H12N4O4	C16H12N2O2	C11H12N4O4	6.4979	6.4275	6.422
Negative	265.14	8.91	79.95784:66 96.96185:4208 245.01723:124	[M-H]-			yes	0.00028932	-10.882	8.275e-05	-11.374	Terpenoid	Terpene lactones	Eudesmanolides, secoeudesmanolides, and derivatives	Fatty alcohols	Blennin D	1alpha-Hydroxyarbusculin A	Ipomeamaronol	HMDB=HMDB0031902,KNApSAcK=C00021527,FooDB=FDB008589,LipidMAPS=LMPR0103620003,UNPD=UNPD104782	HMDB=HMDB0037059,KNApSAcK=C00013003,ChEBI=CHEBI:66024,FooDB=FDB016042,UNPD=UNPD25792;UNPD66441	HMDB=HMDB0038148,KNApSAcK=C00011474,FooDB=FDB017376,LipidMAPS=LMFA05000668,UNPD=UNPD310;UNPD37667	C15H22O4	C15H22O4	C15H22O4	8.5543	8.5306	8.5203
Negative	265.148	11.57	80.44403:61 97.39522:4560 98.27376:50 205.2386:628	[M-H]-			yes	0.0007748	-9.7541	5.741e-05	-10.117	Terpenoid	Terpene lactones	Fatty alcohols	Eudesmanolides, secoeudesmanolides, and derivatives	Blennin D	Ipomeamaronol	1alpha-Hydroxyarbusculin A	HMDB=HMDB0031902,KNApSAcK=C00021527,FooDB=FDB008589,LipidMAPS=LMPR0103620003,UNPD=UNPD104782	HMDB=HMDB0038148,KNApSAcK=C00011474,FooDB=FDB017376,LipidMAPS=LMFA05000668,UNPD=UNPD310;UNPD37667	HMDB=HMDB0037059,KNApSAcK=C00013003,ChEBI=CHEBI:66024,FooDB=FDB016042,UNPD=UNPD25792;UNPD66441	C15H22O4	C15H22O4	C15H22O4	6.995	6.9706	6.9612
Negative	266.124	17.69	101.56793:57 114.54839:4727 133.40941:58 151.29466:5566 151.97166:86	[M-H]-			yes	0.026589	-6.6174	0.0068792	-7.9246	Other	Xanthines	Aminocyclitols	Aporphines	cafaminol	Voglibose	Apomorphine	ChEBI=CHEBI:135099,STOFF=STOFF_3468	HMDB=HMDB0015598,ChEBI=CHEBI:32300,DrugBank=DB04878,Urine=HMDB0015598,Serum=HMDB0015598	HMDB=HMDB0014852,ChEBI=CHEBI:48538;CHEBI:93852,DrugBank=DB00714,T3DB=T3D2867,STOFF=STOFF_807,Urine=HMDB0014852,Serum=HMDB0014852	C11H17N5O3	C10H21NO7	C17H17NO2	5.834	5.8266	5.8264
Negative	267.065	1.19	135.00441:2599 249.04341:58	[M-H]-			yes	0.0056296	-9.2291	0.00020578	-10.449	Flavonoid-like	4'-O-methylisoflavones	7-O-methylisoflavones	6-O-methylated flavonoids	Formononetin	Isoformononetin	Trigraecum	HMDB=HMDB0005808,KNApSAcK=C00002525,ChEBI=CHEBI:18088;CHEBI:77688,FooDB=FDB012219,STOFF=STOFF_8529,BMDB=BMDB05808,LipidMAPS=LMPK12050037,Urine=HMDB0005808,Serum=HMDB0005808,PubChem=5280378,PlantCyc=FORMONONETIN,UNPD=UNPD95557	HMDB=HMDB0033994,KNApSAcK=C00009382,ChEBI=CHEBI:29608,DrugBank=DB04202,FooDB=FDB012228,LipidMAPS=LMPK12050039,PubChem=3764,PlantCyc=CPD-3343,UNPD=UNPD52933	HMDB=HMDB0030720,KNApSAcK=C00013291,FooDB=FDB002643,LipidMAPS=LMPK12110062,UNPD=UNPD188924	C16H12O4	C16H12O4	C16H12O4	9.0499	9.0415	8.6224
Negative	269.088	18.29	89.5487:199 178.28004:154 179.18707:760	[M-H]-			yes	0.00044203	-8.6227	0.00028775	-8.9754	Peptide	Dipeptides	Dipeptides	2'-Hydroxychalcones	Aspartyl-Histidine	Histidinyl-Aspartate	1-(2,4-dihydroxy-6-methoxyphenyl)-3-phenylprop-2-en-1-one	HMDB=HMDB0028755,ChEBI=CHEBI:73451	HMDB=HMDB0028881,ChEBI=CHEBI:73925	HMDB=HMDB0132913,KNApSAcK=C00006935;C00031536,ChEBI=CHEBI:125601,LipidMAPS=LMPK12120245,UNPD=UNPD148108;UNPD220329	C10H14N4O5	C10H14N4O5	C16H14O4	6.6148	6.6148	6.315
Negative	269.249	4.96	251.24718:182	[M-H]-			yes	9.0444e-05	-6.8341	4.2571e-05	-9.3835	Fatty acid	Long-chain fatty acids	Long-chain fatty acids	Long-chain fatty acids	Heptadecanoic acid	(S)-14-Methylhexadecanoic acid	15-Methylpalmitate	HMDB=HMDB0002259,KNApSAcK=C00007426,ChEBI=CHEBI:32365;CHEBI:32366,YMDB=YMDB02302,FooDB=FDB004676,NANPDB=NANPDB_4843,BMDB=BMDB02259,LipidMAPS=LMFA01010017;LMFA01010048,Saliva=HMDB0002259,Feces=HMDB0002259,Serum=HMDB0002259,UNPD=UNPD18637	HMDB=HMDB0031067,ChEBI=CHEBI:84874,FooDB=FDB003069,LipidMAPS=LMFA01020011,Feces=HMDB0031067,UNPD=UNPD1945	HMDB=HMDB0061709,ChEBI=CHEBI:70838;CHEBI:70850,LipidMAPS=LMFA01020012,Feces=HMDB0061709,Serum=HMDB0061709,UNPD=UNPD186682	C17H34O2	C17H34O2	C17H34O2	9.1058	9.0966	9.0966
Positive	270.117	7.09	135.05467:62 136.03964:72 158.13126:242 176.07291:2936 183.97571:99 194.12605:303 212.04857:3706 213.85408:191 252.07819:31144	[M+H]+			yes	0.0013336	-8.1778	0.00011233	-8.5346	Peptide	Dipeptides	Dipeptides	Beta-diketones	Asparaginyl-Histidine	Histidinyl-Asparagine	4-(3-methyl-5-isoxazolyl)-5-phenylcyclohexane-1,3-dione	HMDB=HMDB0028733,ChEBI=CHEBI:73424	HMDB=HMDB0028880	ChEBI=CHEBI:121596	C10H15N5O4	C10H15N5O4	C16H15NO3	7.8213	7.4047	7.396
Positive	270.307	10.04	84.99405:338 98.91829:57 134.88351:80 176.34338:80 214.02321:103 252.18639:185	[M+H]+			yes	0.0070792	-3.051	0.0001548	-5.2761	Other	Monoalkylamines			Octadecylamine			HMDB=HMDB0029586,ChEBI=CHEBI:63866,FooDB=FDB000745,STOFF=STOFF_5530			C18H39N			6.4734
Negative	277.217	5.01	134.27094:74 257.24097:57 259.27628:309	[M-H]-			yes	0.012257	-8.31	0.0074484	-7.3368	Fatty acid	Lineolic acids and derivatives	Lineolic acids and derivatives	Lineolic acids and derivatives	Punicic acid	Alpha-Linolenic acid	Gamma-Linolenic acid	HMDB=HMDB0030963,KNApSAcK=C00001216;C00001236;C00029815,ChEBI=CHEBI:8638;CHEBI:10275;CHEBI:38382;CHEBI:38383;CHEBI:38384,FooDB=FDB002945;FDB012466,LipidMAPS=LMFA01030146;LMFA01030147;LMFA01030148;LMFA01030347;LMFA01030883;LMFA01030923,PlantCyc=CPD-8231;CPD-8229,UNPD=UNPD131918;UNPD188081;UNPD189180;UNPD191709;UNPD30504;UNPD60946;UNPD72999	HMDB=HMDB0001388;HMDB0030964,ChEBI=CHEBI:27432;CHEBI:32387;CHEBI:92583,DrugBank=DB00132,SMPDB=PW_C001073,T3DB=T3D4812,FooDB=FDB002947;FDB012462;FDB031277,NANPDB=NANPDB_4238;NANPDB_4832;NANPDB_5316,BMDB=BMDB01388,LipidMAPS=LMFA01030152;LMFA01030153;LMFA01030348;LMFA01030349;LMFA01030350;LMFA01030351;LMFA01030352;LMFA01030353,Urine=HMDB0001388,Saliva=HMDB0001388,Feces=HMDB0001388,ECMDB=ECMDB01388,S…	HMDB=HMDB0003073,KNApSAcK=C00001226,ChEBI=CHEBI:28661;CHEBI:32391;CHEBI:92327,SMPDB=PW_C001772,FooDB=FDB002943,STOFF=STOFF_7143,LipidMAPS=LMFA01030141,Serum=HMDB0003073,PubChem=5280933,PlantCyc=CPD-8117,UNPD=UNPD114489;UNPD164451;UNPD228510	C18H30O2	C18H30O2	C18H30O2	7.7308	7.7215	7.7215
Negative	279.039	15.36	111.32266:314 111.97789:81 243.12683:6659	[M-H]-			yes	0.0013248	-8.429	0.024255	-4.7397	Carbohydrate	C-glucuronides	O-glucuronides		2-(6-carboxy-3,4,5-trihydroxyoxan-2-yl)propanedioic acid	6-[(2-carboxyacetyl)oxy]-3,4,5-trihydroxyoxane-2-carboxylic acid		HMDB=HMDB0127483	HMDB=HMDB0127482		C9H12O10	C9H12O10		6.338	6.2808
Negative	279.233	4.97	243.29468:76 259.12024:164 261.24295:1784 262.31512:128	[M-H]-			yes	0.0074408	-11.494	0.0040294	-10.562	Fatty acid	Lineolic acids and derivatives	Lineolic acids and derivatives	Lineolic acids and derivatives	Bovinic acid	Linoleic acid	6Z,9Z-octadecadienoic acid	HMDB=HMDB0003797;HMDB0005047;HMDB0005048,ChEBI=CHEBI:17539;CHEBI:32798;CHEBI:36025;CHEBI:38393;CHEBI:88464,FooDB=FDB021827;FDB023609;FDB023610,BMDB=BMDB03797;BMDB05047;BMDB05048,LipidMAPS=LMFA01030117;LMFA01030118;LMFA01030119;LMFA02000307,Serum=HMDB0003797;HMDB0005047,PubChem=5280644,UNPD=UNPD139398;UNPD198998;UNPD25072	HMDB=HMDB0000673;HMDB0006270,KNApSAcK=C00001224;C00036669,ChEBI=CHEBI:17351;CHEBI:30245;CHEBI:75108;CHEBI:86141;CHEBI:92157,SMPDB=PW_C000530,YMDB=YMDB00884,T3DB=T3D4928,FooDB=FDB006287;FDB006562;FDB012760;FDB023868;FDB030981,NANPDB=NANPDB_443;NANPDB_444;NANPDB_723;NANPDB_2337;NANPDB_3446;NANPDB_4237;NANPDB_4833;NANPDB_5444,STOFF=STOFF_158,BMDB=BMDB00673;BMDB06270,LipidMAPS=LMFA01030120;LMFA010301…	HMDB=HMDB0062238,ChEBI=CHEBI:78705;CHEBI:82749,LipidMAPS=LMFA01030330;LMFA01030332,UNPD=UNPD52434;UNPD77175	C18H32O2	C18H32O2	C18H32O2	7.48	7.4765	7.4765
Positive	281.07	0.81	104.1017:334 181.99457:78 191.00436:147 199.84732:395 221.02747:671 262.0127:131	[M+H]+			yes	0.0022094	-5.261	0.00031476	-8.9105	Benzenoid	Benzenesulfonamides	Coumaric acid esters	Benzimidazoles	Sulfametopyrazine	2-(p-coumaroyl)malic acid	2-(1H-benzimidazol-2-yl)-3-(5-nitro-2-furanyl)-2-propenenitrile	HMDB=HMDB0014802,ChEBI=CHEBI:32162,DrugBank=DB00664,STOFF=STOFF_1356,Urine=HMDB0014802,Serum=HMDB0014802	ChEBI=CHEBI:134253,FooDB=FDB020639,UNPD=UNPD21774	ChEBI=CHEBI:92127	C11H12N4O3S	C13H12O7	C14H8N4O3	7.0546	6.7946	6.6828
Negative	281.249	4.94	111.61156:222 262.38336:309 263.33725:1289 264.26581:124	[M-H]-			yes	0.0015895	-13.018	0.0016435	-12.452	Fatty acid	Long-chain fatty acids	Long-chain fatty acids	Long-chain fatty acids	(Z)-13-Octadecenoic acid	Petroselinic acid	Vaccenic acid	HMDB=HMDB0041480;HMDB0062218,ChEBI=CHEBI:82617;CHEBI:82618,FooDB=FDB021443,LipidMAPS=LMFA01030290;LMFA01030880,UNPD=UNPD160110;UNPD162680;UNPD222211	HMDB=HMDB0002080,KNApSAcK=C00001235,ChEBI=CHEBI:28194;CHEBI:30829;CHEBI:32375;CHEBI:32377;CHEBI:36022,FooDB=FDB011271;FDB012765;FDB030008;FDB031099,NANPDB=NANPDB_4235,BMDB=BMDB02080,LipidMAPS=LMFA01030066;LMFA01030067,Serum=HMDB0002080,PubChem=5461010,PlantCyc=CPD-8477,UNPD=UNPD150150;UNPD178282;UNPD222395	HMDB=HMDB0003231;HMDB0240219,KNApSAcK=C00000347;C00001240,ChEBI=CHEBI:28727;CHEBI:50464;CHEBI:30827;CHEBI:30828;CHEBI:36023;CHEBI:50498,DrugBank=DB04801,FooDB=FDB002952;FDB012766,BMDB=BMDB03231,LipidMAPS=LMFA01030076;LMFA01030077,Saliva=HMDB0003231,Feces=HMDB0003231,Serum=HMDB0003231,PubChem=5461069,PlantCyc=CPD-9247,UNPD=UNPD107194;UNPD118396;UNPD218157	C18H34O2	C18H34O2	C18H34O2	5.7348	5.7348	5.7348
Positive	283.233	6.54	91.06198:72 93.08547:101 95.06992:134 105.02724:83 106.8192:178 109.15199:86 111.08586:52 119.07816:114 121.00938:103 131.15674:63 132.98853:875 135.21468:140 137.22125:80 145.19836:199 147.13174:305 149.10977:296 159.05133:490 161.05269:270 171.08098:68 173.14494:467 175.19057:173 185.2431:71 187.03961:402 189.09665:68 199.09097:198 200.61603:130 201.25806:235 203.11154:86 213.15701:367 215.0748…	[M+H]+			yes	0.021287	-6.1745	0.0012557	-6.2108	Fatty acid	Long-chain fatty acids	Fatty acid methyl esters	Long-chain fatty acids	7-hydroxy-10-heptadecen-8-ynoic acid	6-Oxabicyclo[3.1.0]hexane-2-undecanoic acid methyl ester	12-hydroxy-8E,10E-heptadecadienoic acid	LipidMAPS=LMFA01050260	ChEBI=CHEBI:79962	LipidMAPS=LMFA01050194	C17H30O3	C17H30O3	C17H30O3	6.4822	6.4429	6.4235
Negative	283.264	13.37	221.34186:62 265.27936:182	[M-H]-			yes	0.00056057	-9.5852	1.1892e-05	-9.9569	Fatty acid	Long-chain fatty acids	Long-chain fatty acids	Long-chain fatty acids	16-Methylheptadecanoic acid	Stearic acid	(2S)-2-methylheptadecanoate	HMDB=HMDB0031066,ChEBI=CHEBI:84896,FooDB=FDB003068,STOFF=STOFF_98,LipidMAPS=LMFA01020014,UNPD=UNPD110472	HMDB=HMDB0000827,KNApSAcK=C00001238;C00032087,ChEBI=CHEBI:25629;CHEBI:28842,DrugBank=DB03193,SMPDB=PW_C000661,YMDB=YMDB00682,T3DB=T3D4755,FooDB=FDB002941;FDB031183,NANPDB=NANPDB_251;NANPDB_721;NANPDB_2335;NANPDB_4155;NANPDB_4836,STOFF=STOFF_52,BMDB=BMDB00827,LipidMAPS=LMFA01010018;LMFA01010047,Urine=HMDB0000827,Saliva=HMDB0000827,Feces=HMDB0000827,CSF=HMDB0000827,Serum=HMDB0000827,PubChem=3033836…	ChEBI=CHEBI:84269;CHEBI:85218,STOFF=STOFF_423,LipidMAPS=LMFA01020093,UNPD=UNPD168077	C18H36O2	C18H36O2	C18H36O2	9.2706	9.113	8.9033
Negative	286.027	13.36	113.07339:358 191.03384:52 191.92183:147 225.66687:58 226.93552:8018	[M-H]-			yes	0.0048809	11.357	0.0020824	11.283	Carbohydrate	Monosaccharides	Secondary carboxylic acid amides	Gamma amino acids and derivatives	N-acetyl-6-O-sulfo-D-glucosamine	vamidothion	AminoDAHP	ChEBI=CHEBI:61791	ChEBI=CHEBI:38990	ChEBI=CHEBI:29512,PubChem=90657836;56928076	C7H13NO9S	C8H18NO4PS2	C7H14NO9P	7.7106	7.6076	7.5965
Positive	288.172	14.69	183.39764:55 270.9212:66 276.22443:89 287.76349:66	[M+H]+			yes	0.00038022	-8.6204	0.000832	-8.9197	Organic acid	Jasmonic acids	Fatty acid esters	Alpha-branched alpha,beta-unsaturated ketones	Jasmonic acid	Isoamyl 2-furonpropionate	3-Ethenyl-2,5-dimethyl-4-oxohex-5-en-2-yl acetate	HMDB=HMDB0032797,KNApSAcK=C00000218;C00000446;C00049053,ChEBI=CHEBI:18292;CHEBI:18435;CHEBI:58431;CHEBI:136179;CHEBI:136184;CHEBI:138625;CHEBI:139300,FooDB=FDB015493;FDB021719;FDB030070;FDB030077,LipidMAPS=LMFA02020001;LMFA02020003;LMFA02020004;LMFA02020017,PubChem=7251183;7251182;7251181;5281166,PlantCyc=CPD-734;CPD-731;CPD-5943,UNPD=UNPD139120;UNPD152425;UNPD160716	HMDB=HMDB0037735,FooDB=FDB016865,LipidMAPS=LMFA07010913	HMDB=HMDB0041573,FooDB=FDB021564,UNPD=UNPD46981	C12H18O3	C12H18O3	C12H18O3	6.8121	6.3794	6.2075
Negative	293.166	7.64	221.03323:2625 236.05884:6205 237.17465:59 273.00693:162	[M-H]-			yes	0.033331	-11.348	0.071038	-3.2271	Other	Gingerols	Dibenzocycloheptenes	Phenylpyridines	Gingerol	noxiptiline	3-[4-(5-pentyl-2-pyridinyl)phenyl]-2-propenamide	HMDB=HMDB0005783,KNApSAcK=C00002748,ChEBI=CHEBI:10136,FooDB=FDB001108,PubChem=442793,PlantCyc=CPD-13494,UNPD=UNPD73001	ChEBI=CHEBI:135232,STOFF=STOFF_1612	ChEBI=CHEBI:112401	C17H26O4	C19H22N2O	C19H22N2O	8.0472	8.0165	8.0154
Negative	293.176	5.31	97.45515:1045 192.37778:173 193.32126:276 221.1777:17664 222.08191:61 236.1694:38907 237.17828:388	[M-H]-			yes	0.02738	-10.086	0.064428	-9.7214	Other	Gingerols	Sesquiterpenoids	Germacrane sesquiterpenoids	Gingerol	Phytuberin	Tanacetol A	HMDB=HMDB0005783,KNApSAcK=C00002748,ChEBI=CHEBI:10136,FooDB=FDB001108,PubChem=442793,PlantCyc=CPD-13494,UNPD=UNPD73001	HMDB=HMDB0035754,KNApSAcK=C00003172,ChEBI=CHEBI:8196,FooDB=FDB014488,UNPD=UNPD126874;UNPD168456	HMDB=HMDB0035722,FooDB=FDB014446	C17H26O4	C17H26O4	C17H26O4	8.5281	8.5004	8.2106
Positive	296.066	18.61	86.75669:64 104.46555:13423 235.67957:76 237.01617:8997 237.70566:56	[M+H]+			yes	0.0053805	-10.775	8.079e-05	-10.911	Carbohydrate	Pentose phosphates	Benzenesulfonamides	Sulfanilides	5-Aminoimidazole ribonucleotide	N4-Acetylsulfamethoxazole	N-(2,3-dihydro-1,4-benzodioxin-6-yl)-1-methyl-4-pyrazolesulfonamide	HMDB=HMDB0001235;HMDB0062575,KNApSAcK=C00019655,ChEBI=CHEBI:28843;CHEBI:58592;CHEBI:137981;CHEBI:138560,SMPDB=PW_C000955,YMDB=YMDB00065;YMDB00492,FooDB=FDB022504;FDB030558,BMDB=BMDB01235,ECMDB=ECMDB01235,PubChem=44229244;16048619;161500;153,PlantCyc=5-PHOSPHORIBOSYL-5-AMINOIMIDAZOLE	HMDB=HMDB0013854,ChEBI=CHEBI:31169,STOFF=STOFF_595,Urine=HMDB0013854,Serum=HMDB0013854	ChEBI=CHEBI:109024	C8H14N3O7P	C12H13N3O4S	C12H13N3O4S	6.6092	6.4566	5.9572
Negative	298.933	6.3	236.88623:65 278.89429:205 280.5639:64	[M-H]-			yes	0.025394	-9.5146	0.0051688	-9.9933	No annotation
Negative	298.943	4.24	99.55523:59 253.20834:127 281.1991:67	[M-H]-			yes	0.019529	-8.0216	0.01031	-8.3888	No annotation
Negative	299.906	15.02	112.87914:65 199.84735:135 205.95169:11169 206.93274:79 299.86407:51	[M-H]-			yes	0.0078182	6.8182	0.077009	6.2415	No annotation
Negative	300.904	13.5	113.08646:2371 205.90488:4946 206.95486:103127 207.99353:95 300.96283:233	[M-H]-			yes	0.0021499	10.473	0.017119	9.4198	No annotation
Negative	303.233	4.89	205.35916:1121 267.34943:186 285.21024:594	[M-H]-			yes	0.0042519	-9.3333	0.00098585	-6.86	Other	Androgens and derivatives	Long-chain fatty acids	Long-chain fatty acids	Mesterolone	Arachidonic acid	Cis-8,11,14,17-Eicosatetraenoic acid	HMDB=HMDB0006036,ChEBI=CHEBI:135293,FooDB=FDB023812,STOFF=STOFF_5739,BMDB=BMDB06036,LipidMAPS=LMST02020107	HMDB=HMDB0001043;HMDB0060102,KNApSAcK=C00000388,ChEBI=CHEBI:15843;CHEBI:32395;CHEBI:36306,DrugBank=DB04557,SMPDB=PW_C000821,FooDB=FDB011872,BMDB=BMDB01043,LipidMAPS=LMFA01030001;LMFA01030003;LMFA01030393;LMFA01030817,Urine=HMDB0001043,Saliva=HMDB0001043,Feces=HMDB0001043,CSF=HMDB0001043,Serum=HMDB0001043;HMDB0060102,PubChem=5460265;444899,PlantCyc=ARACHIDONIC_ACID,UNPD=UNPD1153;UNPD128376;UNPD841…	HMDB=HMDB0002177,ChEBI=CHEBI:71488;CHEBI:71563,SMPDB=PW_C001466,FooDB=FDB022887,BMDB=BMDB02177,LipidMAPS=LMFA01030176;LMFA01030818,Serum=HMDB0002177,PubChem=25244091,PlantCyc=CPD-8121,UNPD=UNPD124019;UNPD172475	C20H32O2	C20H32O2	C20H32O2	8.4501	8.3486	8.3269
Positive	310.111	13.82	160.0704:108 166.02065:236 195.993:116 201.32758:55 210.06488:80 225.20352:371 226.34464:192 238.09372:124 244.11127:1948 246.13235:119 255.4931:84 256.20035:251 273.08246:4099 274.06818:5867 275.10312:154 291.20355:21963 292.14679:73139	[M+H]+			yes	0.0012426	8.5396	0.00064905	10.539	Sialic acid	N-acylneuraminic acids	Neuraminic acids	Pyrrolopyrimidine nucleosides and nucleotides	N-Acetylneuraminic acid	9-O-acetylneuraminic acid	sangivamycin	HMDB=HMDB0000230;HMDB0000773,ChEBI=CHEBI:17012;CHEBI:35418;CHEBI:49026;CHEBI:45744;CHEBI:58705;CHEBI:58770,DrugBank=DB01894;DB02344;DB03721;DB04265,SMPDB=PW_C000155,FooDB=FDB022234,BMDB=BMDB00230;BMDB00773,Urine=HMDB0000230,Saliva=HMDB0000230,Feces=HMDB0000230,ECMDB=ECMDB00830;ECMDB20347;ECMDB20348,CSF=HMDB0000230,Serum=HMDB0000230,PubChem=21983255;7173827;6857396;445063;439197,PlantCyc=CPD0-1123…	ChEBI=CHEBI:28879,PubChem=440038	ChEBI=CHEBI:85997,PubChem=14978,UNPD=UNPD112652;UNPD134006	C11H19NO9	C11H19NO9	C12H15N5O5	8.2416	7.851	7.6419
Negative	311.159	9.7	97.01373:127 169.90216:327 182.98914:7419 184.06721:455 197.01117:362 198.03201:79 210.93643:90 211.93918:153 225.0141:258 226.04297:100 239.17435:102 242.81894:173 247.03867:103 291.00128:158 292.94452:53	[M-H]-			yes	0.00022698	-10.128	0.00014836	-10.625	Other	Phenothiazines	Furanones	Oxosteroids	Ethopropazine	Jatrophone	Hypolide;Triptophenolide	HMDB=HMDB0014536,ChEBI=CHEBI:60348;CHEBI:60349;CHEBI:313639,DrugBank=DB00392,STOFF=STOFF_4025,Urine=HMDB0014536,Serum=HMDB0014536	KNApSAcK=C00003446,ChEBI=CHEBI:6086,UNPD=UNPD180019;UNPD198959;UNPD226567	KNApSAcK=C00035773,ChEBI=CHEBI:114185,UNPD=UNPD166605;UNPD89781	C19H24N2S	C20H24O3	C20H24O3	8.0996	7.8275	7.8151
Negative	311.169	4.43	99.51999:69 119.43421:61 170.11856:257 183.20111:6668 184.19363:1321 197.13043:383 198.15117:238 211.36835:137 212.07205:73 225.16:212 226.16434:75 239.25882:217 240.16302:62 247.35004:270	[M-H]-			yes	0.0084806	-8.1963	0.024156	-8.409	Other	Tetrahydroisoquinolines	Furanones	Oxosteroids	Praziquantel	Jatrophone	Hypolide;Triptophenolide	HMDB=HMDB0015191,ChEBI=CHEBI:91583,DrugBank=DB01058,STOFF=STOFF_1272,Urine=HMDB0015191,Serum=HMDB0015191	KNApSAcK=C00003446,ChEBI=CHEBI:6086,UNPD=UNPD180019;UNPD198959;UNPD226567	KNApSAcK=C00035773,ChEBI=CHEBI:114185,UNPD=UNPD166605;UNPD89781	C19H24N2O2	C20H24O3	C20H24O3	8.0843	7.9373	7.9325
Negative	316.117	18.61	242.13962:12802 257.12164:51	[M-H]-			yes	0.00093822	-4.7457	0.00044074	-8.142	Organic acid	Cinnamic acids and derivatives	Crinine- and Haemanthamine-type amaryllidaceae alkaloids	Histidine and derivatives	Piplartine	Crinamabine;Crinamidine	N-(1-Deoxy-1-fructosyl)histidine	HMDB=HMDB0030341,KNApSAcK=C00002066,ChEBI=CHEBI:8241;CHEBI:92424,FooDB=FDB002004;FDB002184,UNPD=UNPD37412;UNPD98190	KNApSAcK=C00024382,ChEBI=CHEBI:31436,UNPD=UNPD100058;UNPD126275	HMDB=HMDB0037839,FooDB=FDB016990	C17H19NO5	C17H19NO5	C12H19N3O7	7.9936	7.8198	7.8197
Positive	318.12	0.83	110.05455:325 122.1579:52 156.07526:3931 168.04648:115 178.1454:81 184.05872:108 189.93423:7053 198.15663:177 202.05876:787 209.49744:61 220.00052:1779 222.07761:420 233.98187:346 236.20352:505 238.10254:7149 251.94525:78 256.14624:670 264.01929:420 281.89667:20301 282.64514:83 300.0127:43778	[M+H]+			yes	0.0022879	-7.1847	0.002073	-9.833	Amino acid	Histidine and derivatives	Indolines	Sulfanilides	N-(1-Deoxy-1-fructosyl)histidine	oxyphenisatine	N-(2,2,4-trimethyl-3H-benzofuran-7-yl)benzenesulfonamide	HMDB=HMDB0037839,FooDB=FDB016990	ChEBI=CHEBI:135358,DrugBank=DB04823,STOFF=STOFF_1620	ChEBI=CHEBI:121945	C12H19N3O7	C20H15NO3	C17H19NO3S	7.1146	6.5085	6.4023
Negative	323.094	18.19	127.29776:1209 173.33424:177 241.08539:3432 255.05746:1705	[M-H]-		yes	yes	0.59757	-0.63568	0.00048994	-4.9669	Amino acid	Proline and derivatives	2-arylbenzofuran flavonoids	2-arylbenzofuran flavonoids	Portulacaxanthin I	Moracin L	Moracin K	KNApSAcK=C00001603,ChEBI=CHEBI:8340,UNPD=UNPD108833;UNPD12989	HMDB=HMDB0041297,KNApSAcK=C00036156,FooDB=FDB021214,UNPD=UNPD108149	HMDB=HMDB0041296,KNApSAcK=C00036155,FooDB=FDB021213,UNPD=UNPD111567	C14H16N2O7	C19H16O5	C19H16O5	6.5231	6.5198	6.4602
Positive	325.108	0.81	97.09777:212 126.92301:410 144.96027:437 162.16687:401 162.90359:651 212.67593:77 223.02045:208 240.92603:103 250.82062:84 253.01013:314 258.82227:278 270.98221:583 288.11206:428 288.8342:1546 306.31531:207 307.05771:395	[M+H]+			yes	0.0079257	3.353	0.00012119	4.1125	Flavonoid-like	2-arylbenzofuran flavonoids	2-arylbenzofuran flavonoids	Homoisoflavones	Moracin L	Moracin K	R-10-Hydroxywarfarin	HMDB=HMDB0041297,KNApSAcK=C00036156,FooDB=FDB021214,UNPD=UNPD108149	HMDB=HMDB0041296,KNApSAcK=C00036155,FooDB=FDB021213,UNPD=UNPD111567	HMDB=HMDB0013884;HMDB0142561,Urine=HMDB0013884,Serum=HMDB0013884	C19H16O5	C19H16O5	C19H16O5	7.192	7.1863	7.0379
Positive	325.111	13.96	96.94374:575 109.07051:383 115.20589:59 127.02428:1660 144.95856:3150 162.99448:5930 180.87015:57 211.08563:86 212.96301:52 222.98773:86 241.08618:162 246.78528:223 252.37683:60 252.98749:254 258.92517:311 271.10205:2648 288.27234:560 288.96533:2734 306.039:72 307.04181:420	[M+H]+			yes	0.00071542	8.0242	0.00010748	7.7562	Carbohydrate	Disaccharides	C-glycosyl compounds	Phenanthrenes and derivatives	bis-D-fructose 2',1:2,1'-dianhydride	bis-beta-D-fructofuranose 1,2':2,3'-dianhydride	2,3-Dehydro-UWM6	ChEBI=CHEBI:17618,UNPD=UNPD170366	ChEBI=CHEBI:4117,UNPD=UNPD11804;UNPD128783	ChEBI=CHEBI:81886,PubChem=50986198;25195328,UNPD=UNPD103092;UNPD109668	C12H20O10	C12H20O10	C19H16O5	7.6535	7.6502	7.6273
Negative	325.185	4.4	119.56905:100 170.15659:367 183.17813:9043 184.17326:1511 185.06036:87 197.29869:828 198.25027:170 211.17517:167 212.19409:309 225.20984:135 226.13321:95 227.3335:73 239.17142:426 240.13245:77 241.09531:72 253.32742:106 254.18491:81 261.20685:437 267.02277:55 268.29556:118 297.37146:57 310.25787:57	[M-H]-			yes	0.0048159	-8.4982	0.035142	-7.0983	Fatty acid	Long-chain fatty alcohols	Retinoids	Ajmaline-sarpagine alkaloids	docebenone	Isoacitretin	Ajmaline	ChEBI=CHEBI:2340,LipidMAPS=LMFA05000652	HMDB=HMDB0003039;HMDB0014602,ChEBI=CHEBI:50172;CHEBI:50173;CHEBI:50174;CHEBI:50175,DrugBank=DB00459,FooDB=FDB023099,STOFF=STOFF_2530,BMDB=BMDB03039,Urine=HMDB0014602,Serum=HMDB0014602	HMDB=HMDB0015495,KNApSAcK=C00001679;C00024283;C00024294;C00024344;C00024345,ChEBI=CHEBI:28462;CHEBI:5979;CHEBI:58567;CHEBI:95132;CHEBI:110180;CHEBI:110205,DrugBank=DB01426,FooDB=FDB030658,STOFF=STOFF_3130,Urine=HMDB0015495,Serum=HMDB0015495,PubChem=44891335;198674,PlantCyc=CPD-4242;CPD-14751,UNPD=UNPD120273;UNPD25291;UNPD39060;UNPD41373;UNPD44856;UNPD4567;UNPD50361;UNPD99706	C21H26O3	C21H26O3	C20H26N2O2	8.1596	8.0585	8.0239
Negative	326.111	14.86	134.31792:2260 134.98236:72 183.16226:108 184.27051:75 263.26105:82 264.11948:62 265.29785:1706 266.06433:3432	[M-H]-			yes	0.0056069	-7.9727	0.055419	-8.2677	Amino acid	N-acyl-alpha amino acids and derivatives	N-arylamides	Phenoxyacetic acid derivatives	N-butyl-N(2)-[(2Z)-2-(2-furyl)-2-(methoxyimino)acetyl]-L-cysteinamide	2-[(3S,6aR,8R,10aR)-3-hydroxy-1,2,3,4,6,6a,8,9,10,10a-decahydropyrano[2,3-c][1,5]oxazocin-8-yl]-N-(1,3-thiazol-2-yl)acetamide	2-[4-(cyclohexylsulfamoyl)-2-methylphenoxy]acetic acid	ChEBI=CHEBI:63182	ChEBI=CHEBI:97297;CHEBI:97967;CHEBI:98679;CHEBI:99103;CHEBI:99172;CHEBI:100671;CHEBI:102382;CHEBI:103057	ChEBI=CHEBI:94158	C14H21N3O4S	C14H21N3O4S	C15H21NO5S	6.4397	6.4326	6.3482
Positive	327.068	9.09	94.62285:66 99.07429:295 115.0102:160 121.1254:114 143.11252:166 150.92435:66 151.95834:5831 152.98148:9343 154.19084:777 167.9109:1786 169.12013:334 169.90692:211 171.13876:2411 174.82904:585 186.94205:539 200.99728:422 202.2083:452 214.91577:14625 215.99237:659 227.10257:2596 228.04221:13558 229.09415:12443 230.21909:211 230.86588:193 233.05649:52735 233.85938:417 235.29709:429 245.20496:100 25…	[M+H]+			yes	0.00018492	-12.573	0.00073976	-13.062	Organic acid	Coumaric acids and derivatives	Coumaric acids and derivatives	Alpha amino acid esters	Fertaric acid	sinapoyltartronic acid	4-nitrophenyl phthalimidoacetate	HMDB=HMDB0029199,ChEBI=CHEBI:76115;CHEBI:76116;CHEBI:76118;CHEBI:76120;CHEBI:91032,YMDB=YMDB01693,FooDB=FDB018773,UNPD=UNPD151102	ChEBI=CHEBI:16210;CHEBI:57680	ChEBI=CHEBI:75058	C14H14O9	C14H14O9	C16H10N2O6	7.3209	7.0784	6.8319
Positive	328.106	13.64	133.34138:52 165.99326:257 178.19193:110 210.04797:81 232.16666:91 244.0694:4325 274.13336:1834 292.01788:14571 309.98068:50998 310.62372:242	[M+H]+			yes	0.006738	7.9254	0.00015802	10.679	Glycosyl	O-glycosyl compounds	Phenolic glycosides	Acylaminobenzoic acid and derivatives	Blepharin	Acetaminophen glucuronide	leteprinim	HMDB=HMDB0029344,KNApSAcK=C00036821,FooDB=FDB000405,UNPD=UNPD104106;UNPD140941;UNPD143222;UNPD158832	HMDB=HMDB0010316,ChEBI=CHEBI:32636;CHEBI:132962,SMPDB=PW_C006326,FooDB=FDB027468,STOFF=STOFF_3697,BMDB=BMDB10316,Urine=HMDB0010316,Feces=HMDB0010316,Serum=HMDB0010316,PubChem=83944,UNPD=UNPD121180	ChEBI=CHEBI:135395	C14H17NO8	C14H17NO8	C15H13N5O4	7.9272	7.9115	7.2796
Negative	337.11	18.03	131.54074:74 141.17075:2072 173.3297:705 253.2598:107 254.99835:10287 269.17981:56 277.00903:148	[M-H]-				0.12547	-1.4433	0.37511	-1.3339	Flavonoid-like	Isoflavones	Pterocarpans	Pterocarpans	3'-(gamma,gamma-Dimethylallyl)genistein	Glyceollin II	Glyceollin I	HMDB=HMDB0037920,KNApSAcK=C00009831,ChEBI=CHEBI:69749,FooDB=FDB017077,LipidMAPS=LMPK12050192,PubChem=25246171,PlantCyc=CPD-6722,UNPD=UNPD192032	HMDB=HMDB0034087,KNApSAcK=C00002531,ChEBI=CHEBI:52127,FooDB=FDB012347,LipidMAPS=LMPK12070124,PubChem=181883,PlantCyc=CPD-4406,UNPD=UNPD1753	HMDB=HMDB0033901,KNApSAcK=C00002530,ChEBI=CHEBI:16470,FooDB=FDB012096,LipidMAPS=LMPK12070123,PubChem=162807,PlantCyc=CPD-4405;GLYCEOLLIN,UNPD=UNPD105577;UNPD13054	C20H18O5	C20H18O5	C20H18O5	7.5311	7.5002	7.5002
Negative	339.2	4.38	170.17621:312 183.18216:6027 184.11522:1284 185.1891:76 197.15146:543 198.15796:133 211.34695:110 225.2688:99 239.2421:184 241.47296:210 253.21259:141 255.40332:77 265.07129:122 275.39493:240 276.22336:134 295.40491:94	[M-H]-			yes	0.0025827	-8.2322	0.033423	-8.2874	Steroid	Steroid lactones	Dipeptides	Bicyclic monoterpenoids	Canrenone	Perindoprilat	Piperochromenoic acid	HMDB=HMDB0003033,ChEBI=CHEBI:135445,FooDB=FDB023096,STOFF=STOFF_7502,BMDB=BMDB03033,Serum=HMDB0003033	HMDB=HMDB0060574,ChEBI=CHEBI:132041,SMPDB=PW_C040677,STOFF=STOFF_8827,Urine=HMDB0060574,Serum=HMDB0060574	HMDB=HMDB0040635,FooDB=FDB020426,UNPD=UNPD35266	C22H28O3	C17H28N2O5	C22H28O3	8.0623	8.0259	7.6821
Positive	341.083	9.51	106.7822:55 140.98151:315 143.14944:257 152.01862:3159 152.99167:1271 157.08377:510 164.98988:4534 166.14555:899 167.12195:4003 168.05548:214 169.09225:135 169.97589:97 170.97244:537 175.12636:1165 178.08325:242 182.15509:228 182.98239:249 183.97401:280 185.08437:788 187.09546:138 188.86388:193 194.57358:58 201.94748:166 203.07799:62 211.13205:188 214.98795:1416 215.86783:485 226.06277:143 226.89…	[M+H]+			yes	0.00014581	-12.486	0.00044974	-12.888	Glycoside	Coumarin glycosides	Coumarin glycosides	Coumarin glycosides	Cichoriin	Aesculin	Daphnin	HMDB=HMDB0030821,KNApSAcK=C00002458,ChEBI=CHEBI:3693,FooDB=FDB002777,PubChem=442101,PlantCyc=CPD-14429,UNPD=UNPD108769;UNPD69007	HMDB=HMDB0030820,KNApSAcK=C00002472,ChEBI=CHEBI:4853;CHEBI:91998,FooDB=FDB002776,STOFF=STOFF_3777,PubChem=5281417,PlantCyc=CPD-14461,UNPD=UNPD119528;UNPD192449;UNPD44084;UNPD68186	KNApSAcK=C00037003,ChEBI=CHEBI:17989,PubChem=439499,PlantCyc=DAPHNIN,UNPD=UNPD128781;UNPD145787;UNPD199842	C15H16O9	C15H16O9	C15H16O9	8.1264	8.1264	7.7097
Negative	341.109	19.28	101.35918:973 112.88071:313 113.53989:3049 115.29495:129 117.4906:93 118.82695:804 119.50386:1416 125.34399:290 131.14413:1316 143.26367:3988 144.048:64 148.96732:570 158.41043:137 159.30539:195 160.58444:1150 161.33365:1828 176.02776:132 177.57472:567 178.43579:3222 179.07803:10176 219.97003:58 280.83356:200	[M-H]-			yes	0.013898	-13.366	0.0047391	-13.726	Fatty acid	Fatty acyl glycosides of mono- and disaccharides	Fatty acyl glycosides of mono- and disaccharides	O-glycosyl compounds	Kojibiose	Turanose	Melibiose	HMDB=HMDB0011742,KNApSAcK=C00050477,ChEBI=CHEBI:33020;CHEBI:1230,BMDB=BMDB11742,Serum=HMDB0011742,UNPD=UNPD101454;UNPD122326	HMDB=HMDB0011740,ChEBI=CHEBI:32528,BMDB=BMDB11740,Serum=HMDB0011740	HMDB=HMDB0000048;HMDB0002923;HMDB0006792;HMDB0038489;HMDB0133305,KNApSAcK=C00001142,ChEBI=CHEBI:28053;CHEBI:28066;CHEBI:28189;CHEBI:43620;CHEBI:4808;CHEBI:36229;CHEBI:36230;CHEBI:36231;CHEBI:53445;CHEBI:59578;CHEBI:61625;CHEBI:61770;CHEBI:61827;CHEBI:62103;CHEBI:62357;CHEBI:71422;CHEBI:71552;CHEBI:139100,DrugBank=DB04116,SMPDB=PW_C000033;PW_C002930,YMDB=YMDB00895;YMDB02304,FooDB=FDB018317,BMDB=BM…	C12H22O11	C12H22O11	C12H22O11	6.9629	6.9166	6.9115
Positive	342.14	0.7	127.14381:1091 144.88452:1265 162.32864:400 163.08875:1444 180.08102:311 210.91562:91 222.16498:141 247.0795:54 253.16528:95 258.69879:310 270.46582:62 271.07751:502 288.50748:70 289.11874:292 306.46057:167 307.16849:163 324.33441:1215 325.05536:2250	[M+H]+			yes	0.0075511	10.912	0.00025827	13.199	Amino acid	Aminocyclitol glycosides	Aminoglycosides	Fatty acyl glycosides of mono- and disaccharides	6-(alpha-D-Glucosaminyl)-1D-myo-inositol	trehalosamine	Lactosamine	HMDB=HMDB0011668,KNApSAcK=C00018315,ChEBI=CHEBI:44230;CHEBI:52283;CHEBI:58700;CHEBI:58886,DrugBank=DB03779,FooDB=FDB028357,BMDB=BMDB11668,PubChem=46878468;195863;577,UNPD=UNPD190987	ChEBI=CHEBI:32525,UNPD=UNPD16755;UNPD44078	HMDB=HMDB0006591,BMDB=BMDB06591	C12H23NO10	C12H23NO10	C12H23NO10	7.3649	6.9641	6.9475
Negative	344.102	18.69	164.25208:4246 164.90048:51 179.21918:357	[M-H]-			yes	0.003957	-8.855	2.3056e-05	-9.2809	Other	Benzoic acid esters	Dimethoxybenzenes	Pyrimidine nucleosides	Isofenphos	2-(2,3-dimethoxyphenyl)-3-(4-methoxyphenyl)-4-thiazolidinone	3-(3-amino-3-carboxypropyl)uridine	HMDB=HMDB0031796,ChEBI=CHEBI:6009,FooDB=FDB008469,STOFF=STOFF_3810	ChEBI=CHEBI:121320	ChEBI=CHEBI:19928,UNPD=UNPD161644;UNPD94471	C15H24NO4PS	C18H19NO4S	C13H19N3O8	7.2678	6.9159	6.8315
Positive	344.123	1.17	147.97461:87 182.1069:285 190.14734:56 193.98016:627 200.98993:62 280.13031:722 308.03812:1334 326.05765:78471 327.10944:95	[M+H]+			yes	0.034738	-6.2255	0.002478	-8.5859	Other	Phenoxy compounds	C-glycosyl compounds	Phenolic glycosides	phenyl [1-(N-succinylamino)pentyl]phosphonate	2-[(2S,5R,6S)-6-(hydroxymethyl)-5-[(4-methylphenyl)sulfonylamino]-2-oxanyl]acetic acid	Niazinin A	ChEBI=CHEBI:43012,DrugBank=DB07893,LipidMAPS=LMFA08020199	ChEBI=CHEBI:118849;CHEBI:118884;CHEBI:118928;CHEBI:119015;CHEBI:119039;CHEBI:119043;CHEBI:119161	HMDB=HMDB0031942,FooDB=FDB008631,UNPD=UNPD81226	C15H22NO6P	C15H21NO6S	C15H21NO6S	8.1427	7.7659	7.7558
Negative	346.045	1.13	134.0542:51 150.84659:85 173.93616:194 211.02936:869 215.92218:83 258.04483:52	[M-H]-			yes	0.00010956	-12.226	0.013252	-10.901	Other	Benzothiazines	Monosaccharide phosphates		5'-Hydroxypiroxicam	O-(alpha-D-mannose-1-phosphoryl)-L-serine		HMDB=HMDB0014096,Urine=HMDB0014096,Serum=HMDB0014096	ChEBI=CHEBI:64679		C15H13N3O5S	C9H18NO11P		7.2979	7.1751
Negative	346.055	13.46	138.9798:60 150.99643:103 193.19318:149 210.99384:1308	[M-H]-			yes	0.0007489	9.6171	0.00072468	10.667	Nucleoside	Purine ribonucleoside monophosphates	Ribonucleoside 3'-phosphates	Pentose phosphates	Adenosine monophosphate	3'-AMP	Adenosine 2'-phosphate	HMDB=HMDB0000045,KNApSAcK=C00019347,ChEBI=CHEBI:16027;CHEBI:40721;CHEBI:95121;CHEBI:456215,DrugBank=DB00131,SMPDB=PW_C000032,YMDB=YMDB00097,FooDB=FDB021806;FDB030677,BMDB=BMDB00045,Urine=HMDB0000045,Saliva=HMDB0000045,Feces=HMDB0000045,ECMDB=ECMDB00045,CSF=HMDB0000045,Serum=HMDB0000045,PubChem=15938965;6083,PlantCyc=AMP,UNPD=UNPD130030;UNPD151359;UNPD182285	HMDB=HMDB0003540,KNApSAcK=C00019350,ChEBI=CHEBI:28931;CHEBI:60880,SMPDB=PW_C001918,FooDB=FDB023193,BMDB=BMDB03540,Saliva=HMDB0003540,ECMDB=ECMDB03540,PubChem=41211,PlantCyc=CPD-3706,UNPD=UNPD178646	HMDB=HMDB0011617,KNApSAcK=C00050412,ChEBI=CHEBI:28223;CHEBI:77740,YMDB=YMDB00564,FooDB=FDB028322,BMDB=BMDB11617,PlantCyc=CPD-3705,UNPD=UNPD56372;UNPD78433	C10H14N5O7P	C10H14N5O7P	C10H14N5O7P	8.6258	8.6236	8.6024
Negative	346.056	19.48	151.34009:121 193.37766:76 211.09703:982	[M-H]-			yes	0.0013336	-9.2302	0.036404	-7.9755	Nucleoside	Purine ribonucleoside monophosphates	Ribonucleoside 3'-phosphates	Pentose phosphates	Adenosine monophosphate	3'-AMP	Adenosine 2'-phosphate	HMDB=HMDB0000045,KNApSAcK=C00019347,ChEBI=CHEBI:16027;CHEBI:40721;CHEBI:95121;CHEBI:456215,DrugBank=DB00131,SMPDB=PW_C000032,YMDB=YMDB00097,FooDB=FDB021806;FDB030677,BMDB=BMDB00045,Urine=HMDB0000045,Saliva=HMDB0000045,Feces=HMDB0000045,ECMDB=ECMDB00045,CSF=HMDB0000045,Serum=HMDB0000045,PubChem=15938965;6083,PlantCyc=AMP,UNPD=UNPD130030;UNPD151359;UNPD182285	HMDB=HMDB0003540,KNApSAcK=C00019350,ChEBI=CHEBI:28931;CHEBI:60880,SMPDB=PW_C001918,FooDB=FDB023193,BMDB=BMDB03540,Saliva=HMDB0003540,ECMDB=ECMDB03540,PubChem=41211,PlantCyc=CPD-3706,UNPD=UNPD178646	HMDB=HMDB0011617,KNApSAcK=C00050412,ChEBI=CHEBI:28223;CHEBI:77740,YMDB=YMDB00564,FooDB=FDB028322,BMDB=BMDB11617,PlantCyc=CPD-3705,UNPD=UNPD56372;UNPD78433	C10H14N5O7P	C10H14N5O7P	C10H14N5O7P	6.4021	6.4013	6.4013
Negative	346.118	18.63	164.21588:5886 166.20306:335 181.34074:350 280.12869:52	[M-H]-			yes	0.019508	-8.5375	0.00034026	-9.0948	Other	Alkyl-phenylketones	Dimethoxybenzenes	O-glycosyl compounds	N-[1-(4-methyl-6-oxo-1-pyrimidinyl)-2-oxo-2-phenylethyl]benzamide	6-[3-(3,4-dimethoxyphenyl)-1H-pyrazolo[1,5-a]pyrimidin-5-ylidene]-1-cyclohexa-2,4-dienone	Dide-O-methylsimmondsin	ChEBI=CHEBI:116912	ChEBI=CHEBI:114839	HMDB=HMDB0041207,FooDB=FDB021106,UNPD=UNPD168681	C20H17N3O3	C20H17N3O3	C14H21NO9	6.3047	6.2944	6.2677
Positive	348.06	0.9	118.94461:1568 135.93643:42546 137.06024:278 168.20148:66 185.14592:103 196.04088:88 250.12286:118 268.05417:104 329.84241:386	[M+H]+			yes	0.0025827	-11.423	0.036038	-10.021	Carbohydrate	Monosaccharide phosphates			O-(alpha-D-mannose-1-phosphoryl)-L-serine			ChEBI=CHEBI:64679			C9H18NO11P			7.3013
Positive	348.07	13.42	119.07539:1106 136.06169:17274	[M+H]+			yes	0.0022617	10.588	0.0022663	10.501	Nucleoside	Purine ribonucleoside monophosphates	Ribonucleoside 3'-phosphates	Pentose phosphates	Adenosine monophosphate	3'-AMP	Adenosine 2'-phosphate	HMDB=HMDB0000045,KNApSAcK=C00019347,ChEBI=CHEBI:16027;CHEBI:40721;CHEBI:95121;CHEBI:456215,DrugBank=DB00131,SMPDB=PW_C000032,YMDB=YMDB00097,FooDB=FDB021806;FDB030677,BMDB=BMDB00045,Urine=HMDB0000045,Saliva=HMDB0000045,Feces=HMDB0000045,ECMDB=ECMDB00045,CSF=HMDB0000045,Serum=HMDB0000045,PubChem=15938965;6083,PlantCyc=AMP,UNPD=UNPD130030;UNPD151359;UNPD182285	HMDB=HMDB0003540,KNApSAcK=C00019350,ChEBI=CHEBI:28931;CHEBI:60880,SMPDB=PW_C001918,FooDB=FDB023193,BMDB=BMDB03540,Saliva=HMDB0003540,ECMDB=ECMDB03540,PubChem=41211,PlantCyc=CPD-3706,UNPD=UNPD178646	HMDB=HMDB0011617,KNApSAcK=C00050412,ChEBI=CHEBI:28223;CHEBI:77740,YMDB=YMDB00564,FooDB=FDB028322,BMDB=BMDB11617,PlantCyc=CPD-3705,UNPD=UNPD56372;UNPD78433	C10H14N5O7P	C10H14N5O7P	C10H14N5O7P	8.5285	8.5261	8.5261
Positive	354.022	13.97	142.02719:163 158.91653:87 219.05966:66 225.66211:152 237.97784:87 243.87555:65 247.42844:201 248.71204:177 251.96356:77 255.5177:299 256.25604:121 265.87772:72 266.82379:898 284.07123:98 284.74011:642 329.74219:256 330.68756:5143 342.42374:90 346.35953:70 347.63779:844 348.4819:2056 353.7973:163	[M+H]+			yes	3.8245e-05	-5.6259	1.0008e-05	-9.6128	Other	Thienothiazines	Indolecarboxylic acids and derivatives	Fluorenes	5'-Hydroxytenoxicam	glionitrin A	9-hydroxyiminofluorene-2,7-disulfonamide	HMDB=HMDB0014098,Urine=HMDB0014098,Serum=HMDB0014098	ChEBI=CHEBI:65967,UNPD=UNPD133551	ChEBI=CHEBI:114722	C13H11N3O5S2	C13H11N3O5S2	C13H11N3O5S2	5.5043	5.4611	5.4488
Positive	355.099	9.92	115.10347:92 140.85242:53 142.20438:57 152.0722:1981 153.16089:609 156.97981:54 164.94585:5977 166.02367:4105 166.99422:1527 169.12433:139 170.8669:140 174.98842:717 177.97661:66 178.98804:738 180.07883:189 180.95744:1345 181.92572:309 182.99306:400 185.07635:782 186.25171:89 189.0343:908 191.88858:55 194.88919:96 196.03946:158 197.04675:398 199.22324:575 214.92563:342 216.18616:291 226.94125:268…	[M+H]+			yes	0.0003289	-10.406	0.0042871	-10.945	Glycoside	Phenolic glycosides	Quinic acids and derivatives	Quinic acids and derivatives	Biflorin	Chlorogenic acid	Cryptochlorogenic acid	HMDB=HMDB0002336,KNApSAcK=C00002417,ChEBI=CHEBI:3094,FooDB=FDB001390,BMDB=BMDB02336,UNPD=UNPD130539	HMDB=HMDB0003164;HMDB0029278;HMDB0032849;HMDB0040690,KNApSAcK=C00002724;C00030807;C00039428;C00049091,ChEBI=CHEBI:16112;CHEBI:16384;CHEBI:57644;CHEBI:57754;CHEBI:75489;CHEBI:95271,FooDB=FDB000275;FDB002562;FDB002582;FDB004038;FDB006821;FDB010826;FDB011810;FDB020490;FDB021038;FDB021749;FDB031207,NANPDB=NANPDB_280;NANPDB_2696;NANPDB_2697;NANPDB_4370;NANPDB_4501;NANPDB_5279;NANPDB_5280;NANPDB_5318;N…	HMDB=HMDB0030653,KNApSAcK=C00029540,ChEBI=CHEBI:75491,FooDB=FDB002561,NANPDB=NANPDB_5281;NANPDB_5448;NANPDB_5468,UNPD=UNPD164733;UNPD169920;UNPD31253;UNPD49725;UNPD210275;UNPD217795;UNPD219879;UNPD226360	C16H18O9	C16H18O9	C16H18O9	8.1698	8.1494	8.0503
Negative	355.147	12.04	116.85304:263 270.86441:62 286.93152:77 293.2244:661 335.02692:169 337.29999:665	[M-H]-			yes	0.021478	-10.256	0.0050967	-8.9058	Other	2'-Hydroxy-dihydrochalcones	Psoralens	Linear diarylheptanoids	alpha,beta-Dihydroxanthohumol	Chalepin acetate	Gingerenone A	HMDB=HMDB0035440,KNApSAcK=C00014615,ChEBI=CHEBI:66332,FooDB=FDB014123,LipidMAPS=LMPK12120536,UNPD=UNPD96079	HMDB=HMDB0030666,KNApSAcK=C00002495,ChEBI=CHEBI:8920,FooDB=FDB002578,UNPD=UNPD162702;UNPD90490	HMDB=HMDB0035403,KNApSAcK=C00002747,ChEBI=CHEBI:5352,FooDB=FDB014078,UNPD=UNPD184085	C21H24O5	C21H24O5	C21H24O5	7.4554	7.0156	6.8292
Negative	360.13	18.38	143.30222:54 178.65393:160 179.34317:537 180.3873:111	[M-H]-			yes	0.013732	-8.227	5.7606e-05	-8.6978	Glycosyl	O-glycosyl compounds	Isoindolones	Dihydropyridinecarboxylic acids and derivatives	De-O-methylsimmondsin	LSM-20631	2,4,6-trimethyl-1,4-dihydropyridine-3,5-dicarboxylic acid O3-methyl ester O5-[2-(phenylthio)ethyl] ester	HMDB=HMDB0041208,FooDB=FDB021107,UNPD=UNPD14191	ChEBI=CHEBI:109234	ChEBI=CHEBI:91615	C15H23NO9	C19H23NO4S	C19H23NO4S	5.148	4.8142	4.7587
Positive	360.145	0.83	127.04088:601 144.95859:602 162.18265:85 162.94232:921 179.91025:423 180.67096:107 198.0488:490 247.00137:55 253.13129:79 258.823:326 270.97498:221 276.17261:56 276.78372:258 288.25363:299 288.91238:1566 324.80283:12526 341.54837:223 342.20389:684 342.8472:3187	[M+H]+			yes	0.0026819	4.3752	0.00014121	4.9642	Other	Sulfinylbenzimidazoles	Aryl thioethers	Piperidinecarboxamides	Rabeprazole	N-cyclohexyl-2-[(6-hydroxy-4-oxo-1-phenyl-2-pyrimidinyl)thio]acetamide	1-[4-(3,4-dihydro-2H-1,5-benzodioxepin-7-yl)-2-thiazolyl]-4-piperidinecarboxamide	HMDB=HMDB0005026,ChEBI=CHEBI:8768;CHEBI:134729,DrugBank=DB01129,SMPDB=PW_C002371,FooDB=FDB023595,STOFF=STOFF_1312,BMDB=BMDB05026	ChEBI=CHEBI:108054	ChEBI=CHEBI:93314	C18H21N3O3S	C18H21N3O3S	C18H21N3O3S	7.1126	6.9875	6.9693
Positive	360.15	13.3	127.15465:136 145.07751:248 162.39276:209 163.02777:805 179.97472:175 180.9539:285 198.16075:148 258.53232:121 271.06561:187 276.89935:59 288.13412:60 289.01657:662 324.8443:19789 342.10843:2213 343.01389:1173	[M+H]+			yes	0.00011222	11.101	0.0069368	11.923	Other	Methoxyphenols	Dimethoxybenzenes	Alpha amino acids and derivatives	N-[2-hydroxy-2-(4-hydroxy-3-methoxyphenyl)ethyl]-3-(4-hydroxy-3-methoxyphenyl)prop-2-enimidic acid	5-[1-[(3,5-dimethoxyphenyl)methylamino]ethylidene]-1-prop-2-enyl-1,3-diazinane-2,4,6-trione	N-[2-(tert-butylamino)-2-oxo-1-pyridin-4-ylethyl]-N-cyclopropyl-4-thiadiazolecarboxamide	HMDB=HMDB0136453,UNPD=UNPD97029;UNPD213501	ChEBI=CHEBI:115010	ChEBI=CHEBI:123275	C19H21NO6	C18H21N3O5	C17H21N5O2S	6.3596	6.1457	5.4667
Negative	362.94	14.75	174.96292:271 268.95312:21221	[M-H]-			yes	0.0034798	10.983	0.11717	10.487	No annotation
Negative	362.941	15.17	174.99864:271 248.84735:146 268.92908:18881 269.87695:52	[M-H]-			yes	0.0053994	10.867	0.12164	10.436	No annotation
Positive	363.998	13.95	158.96114:2438 255.63034:112 256.80524:175 275.89868:4825 290.08728:153 335.50714:100 339.15854:100 339.80859:235 340.74014:300	[M+H]+			yes	9.8152e-05	-5.0401	6.3678e-05	-6.0121	No annotation
Positive	365.105	12.24	185.00844:5170 203.07956:18246 245.06265:66 257.23471:86 275.16452:2414 305.08984:507 347.15796:1645	[M+H]+			yes	0.0016654	11.123	0.0013956	11.057	Other	Arylnaphthalene lignans	6-prenylated isoflavanones	Pyranoisoflavonoids	Justicidin B	Robustone	5-Hydroxy-3',4'-methylenedioxy-6'',6''-dimethylpyrano[2'',3'':7,8]isoflavone	KNApSAcK=C00000701,ChEBI=CHEBI:6094,NANPDB=NANPDB_3614,PubChem=442882,PlantCyc=CPD-13455,UNPD=UNPD138757	KNApSAcK=C00009503,LipidMAPS=LMPK12050245,UNPD=UNPD141441	KNApSAcK=C00009907,LipidMAPS=LMPK12050249,UNPD=UNPD44996	C21H16O6	C21H16O6	C21H16O6	8.2881	8.26	8.26
Negative	367.359	4.73	349.14203:170	[M-H]-			yes	9.8152e-05	-6.1508	0.00055094	-8.6283	Fatty acid	Very long-chain fatty acids	Very long-chain fatty acids	Fatty alcohols	Tetracosanoic acid	22-methyltricosanoic acid	20-Tetracosene-1,18-diol	HMDB=HMDB0002003,KNApSAcK=C00001223,ChEBI=CHEBI:28866;CHEBI:31014,SMPDB=PW_C001340,YMDB=YMDB00684,FooDB=FDB004651;FDB021823,NANPDB=NANPDB_4845,BMDB=BMDB02003,LipidMAPS=LMFA01010024;LMFA01010051,Feces=HMDB0002003,Serum=HMDB0002003,PubChem=5461021;11197,PlantCyc=TETRACOSANOATE,UNPD=UNPD123711	ChEBI=CHEBI:84903,LipidMAPS=LMFA01020021,UNPD=UNPD131074	HMDB=HMDB0040887,FooDB=FDB020723,UNPD=UNPD167601;UNPD41419;UNPD213735	C24H48O2	C24H48O2	C24H48O2	6.594	6.1773	5.7607
Positive	369.352	11.23	105.09605:170 107.10039:297 109.05307:374 111.11356:239 119.13162:545 121.19626:640 123.0648:495 125.12024:145 131.05313:219 133.18248:846 135.1279:2023 137.1517:216 145.07385:238 147.14442:2585 149.15755:1661 151.1922:273 159.04695:481 161.11542:2874 163.19409:762 165.10709:374 173.1322:516 175.18106:1764 177.25507:399 179.19115:401 187.19559:896 189.25516:2025 191.27405:235 193.24321:243 201.15…	[M+H]+			yes	9.826e-05	11.597	8.4272e-05	12.761	Other	Vitamin D and derivatives			3-Deoxyvitamin D3			LipidMAPS=LMST03020618			C27H44			7.366
Negative	370.088	14.75	113.02661:2790 170.90971:4017 197.06152:195 242.08817:1192 256.23627:114	[M-H]-			yes	3.8884e-05	10.765	0.0048169	11.127	Pyridine	Chromenopyridines	Glycosylamines	Tetracyclines	Nedocromil	azaribine	(4aS,5aR,12aS)-10,12a-dihydroxy-1,3,11,12-tetraoxo-4,4a,5,5a,6,11a-hexahydrotetracene-2-carboxamide	HMDB=HMDB0014854,ChEBI=CHEBI:7492;CHEBI:51029,DrugBank=DB00716,STOFF=STOFF_1009,Urine=HMDB0014854,Serum=HMDB0014854	ChEBI=CHEBI:88272	ChEBI=CHEBI:125420	C19H17NO7	C14H17N3O9	C19H17NO7	7.6498	7.5473	7.2888
Negative	374.233	7.82	124.04018:887 125.01601:257 148.0636:148 149.12517:213 158.15573:184 164.35516:154 165.14734:646 172.11099:270 187.9604:129 189.21265:477 190.16315:546 201.0692:78 201.98428:84 204.18884:148 205.12579:270 206.18822:1361 207.06978:209 213.03145:93 214.22279:73 215.17809:248 216.01035:1620 216.87746:122 224.14194:377 232.06943:22475 233.23553:247 234.08734:283 245.29999:137 247.17487:553 248.14398:…	[M-H]-			yes	0.0016654	-11.754	0.00012502	-12.095	Other	Cembranolides	3-hydroxy delta-7-steroids	Stichoneurine-type alkaloids	17-dimethylaminolobohedleolide	Icaceine	Tuberostemonine J;(+)-Tuberostemonine J;(9alpa,9aalpha)-Neotuberostemonin	ChEBI=CHEBI:66587,UNPD=UNPD101736;UNPD69219;UNPD209763	KNApSAcK=C00001645,ChEBI=CHEBI:5858,UNPD=UNPD157036;UNPD20852	KNApSAcK=C00026715;C00026716;C00028678;C00029153;C00029154;C00029155;C00034732;C00041952;C00051011,ChEBI=CHEBI:69383;CHEBI:69385;CHEBI:69386,UNPD=UNPD101124;UNPD106181;UNPD125329;UNPD13465;UNPD149088;UNPD165399;UNPD168329;UNPD191041;UNPD191319;UNPD27696;UNPD40542;UNPD72202;UNPD73508;UNPD80941;UNPD89220;UNPD89892;UNPD219574;UNPD229531	C22H33NO4	C22H33NO4	C22H33NO4	7.6888	7.6021	7.599
Negative	374.245	5.43	123.49864:298 124.54129:2798 125.44447:416 134.11882:104 141.52551:270 148.25725:500 149.34926:1165 158.48051:1114 159.38577:258 164.85818:688 165.58215:389 166.45657:352 172.24344:476 174.29427:279 176.49934:282 177.34552:161 183.67308:225 187.6255:277 188.79114:629 189.40579:686 190.40405:1814 191.28258:514 201.11031:86 205.15292:441 206.29568:3112 207.42929:645 208.25188:283 209.489:190 214.18…	[M-H]-			yes	0.0017926	-13.265	0.00018753	-13.576	No annotation
Positive	376.248	7.82	124.9624:2611 126.11012:14344 135.27664:763 163.94836:1326 190.99969:368 192.52904:334 200.96623:533 209.14609:104298 209.98621:48921 217.48318:1746 218.25528:9731 219.05701:22784 227.83673:1496 257.14645:776 259.26633:1263 260.17871:534 273.92471:4771 275.13052:78832 284.24896:3479 292.0358:61439 293.13925:224644 302.09637:510372 303.1109:3793 343.08929:7612 358.12289:62601	[M+H]+			yes	0.00072987	-14.755	0.0016349	-13.108	Other	Cembranolides	3-hydroxy delta-7-steroids	Stichoneurine-type alkaloids	17-dimethylaminolobohedleolide	Icaceine	Tuberostemonine J;(+)-Tuberostemonine J;(9alpa,9aalpha)-Neotuberostemonin	ChEBI=CHEBI:66587,UNPD=UNPD101736;UNPD69219;UNPD209763	KNApSAcK=C00001645,ChEBI=CHEBI:5858,UNPD=UNPD157036;UNPD20852	KNApSAcK=C00026715;C00026716;C00028678;C00029153;C00029154;C00029155;C00034732;C00041952;C00051011,ChEBI=CHEBI:69383;CHEBI:69385;CHEBI:69386,UNPD=UNPD101124;UNPD106181;UNPD125329;UNPD13465;UNPD149088;UNPD165399;UNPD168329;UNPD191041;UNPD191319;UNPD27696;UNPD40542;UNPD72202;UNPD73508;UNPD80941;UNPD89220;UNPD89892;UNPD219574;UNPD229531	C22H33NO4	C22H33NO4	C22H33NO4	7.2946	7.1281	7.0902
Positive	376.26	1.87	108.11963:667 125.26871:5413 126.10949:13246 127.22234:1663 134.09453:1411 134.93884:1172 163.66147:2968 168.22563:1207 174.38425:1210 191.19069:2400 192.01328:1602 200.07634:2074 209.09338:215578 210.17677:59104 218.2514:12340 219.17215:42740 228.10834:5858 257.34525:5900 272.21771:1599 274.15689:7723 275.21152:100858 276.28967:3165 284.02484:1026 292.18622:170711 293.32999:745437 294.34161:1210…	[M+H]+			yes	8.1182e-07	16.703	1.7791e-05	16.629	No annotation
Negative	377.086	19.28	179.06752:352 197.07277:72 214.25742:193 215.15829:2218 341.00439:31413	[M-H]-			yes	0.0022202	-10.762	0.002319	-8.5325	Peptide	Dipeptides	3-methoxychromones	3-methoxychromones	Carbenicillin	2-(1,3-dihydroxy-4-oxocyclohex-2-en-1-yl)-5-hydroxy-3,6,7-trimethoxy-4H-chromen-4-one	5,8-dihydroxy-2-(1-hydroxy-3-methoxy-4-oxocyclohex-2-en-1-yl)-3,7-dimethoxy-4H-chromen-4-one	HMDB=HMDB0014717,ChEBI=CHEBI:3393;CHEBI:51897,DrugBank=DB00578,Urine=HMDB0014717,Serum=HMDB0014717	HMDB=HMDB0130283	HMDB=HMDB0129294	C17H18N2O6S	C18H18O9	C18H18O9	6.9	6.6079	6.6079
Positive	381.068	0.87	201.03613:3135 201.8952:254 208.97688:210 215.72223:162 218.8801:3577 290.72153:142 296.15088:63 344.30713:60 361.9967:183 371.64169:152	[M+H]+			yes	5.2954e-05	-12.763	3.6437e-05	-13.059	Other	Flavanones	Tetracenequinones	Phenylpyridines	[4-(5,7-dihydroxy-6,8-dimethyl-4-oxo-3,4-dihydro-2H-1-benzopyran-2-yl)phenyl]oxidanesulfonic acid	Tcm D 3;Tetracenomycin D3	2-methylsulfonyl-4,6-diphenyl-3-thieno[2,3-b]pyridinamine	HMDB=HMDB0130596	KNApSAcK=C00017937,ChEBI=CHEBI:32202;CHEBI:74934;CHEBI:77990,PubChem=86289446;196730,UNPD=UNPD21058	ChEBI=CHEBI:105620	C17H16O8S	C20H12O8	C20H16N2O2S2	5.7857	5.4367	5.0843
Positive	381.079	19.26	201.0993:415 219.13831:543	[M+H]+			yes	0.001401	-12.939	7.7516e-05	-12.156	Glycosyl	O-glycosyl compounds			4-Methoxybenzyl O-(2-sulfoglucoside)			HMDB=HMDB0034754,FooDB=FDB013300,UNPD=UNPD81525			C14H20O10S			7.5752
Negative	384.935	16.4	153.01309:174 154.95787:149 204.85471:292 247.61349:70 249.01611:24132 290.95111:406	[M-H]-			yes	0.0060771	13.152	0.014911	13.232	No annotation
Negative	387.275	5.47	246.4859:58 317.10452:58 370.27826:70	[M-H]-			yes	0.0036505	-6.7851	0.0014206	-9.1055	Fatty acid	Long-chain fatty acids	Long-chain fatty acids		ascr#26	oscr#26		ChEBI=CHEBI:78964	ChEBI=CHEBI:79148		C21H40O6	C21H40O6		5.0529	5.0529
Negative	389.291	5.44	290.93948:100 304.66235:62 306.03864:69 306.93896:586	[M-H]-			yes	0.0012876	-9.8256	0.0038641	-9.6622	No annotation
Negative	393.278	5.38	310.99805:469 349.18954:60	[M-H]-			yes	0.00056165	-9.5473	0.012442	-9.3052	Terpenoid	Sesquiterpenoids	Vitamin D and derivatives		7,8-Dehydro-beta-micropteroxanthin	25-hydroxy-16,17,23,23,24,24-hexadehydrovitamin D3 / 25-hydroxy-16,17,23,23,24,24-hexadehydrocholecalciferol		HMDB=HMDB0038506,KNApSAcK=C00023122,FooDB=FDB017883	LipidMAPS=LMST03020091		C27H38O2	C27H38O2		6.3204	6.2731
Negative	393.893	15.03	205.96178:291 299.88678:27123 301.02069:1871 376.22235:94	[M-H]-			yes	0.0037508	7.0974	0.040635	5.9896	No annotation
Negative	394.891	2.14	112.9563:111 205.92325:149 206.98224:7222 298.93091:70 300.87222:630953 301.99503:1164 395.18295:262	[M-H]-			yes	0.00239	10.898	0.0063964	10.273	No annotation
Negative	397.202	6.53	292.90265:99 328.90314:62 332.8537:80 376.7543:116	[M-H]-			yes	0.015713	-11.802	0.00083152	-11.945	Other	Melleolides and analogues	Coumarins and derivatives	Angular pyranocoumarins	Armillaribin	Gumosin	5-Hydroxy-8,8-dimethyl-6-(3-methyl-1-oxobutyl)-4-pentyl-2H,8H-benzo[1,2-b:3,4-b']dipyran-2-one	HMDB=HMDB0031672,FooDB=FDB008332	ChEBI=CHEBI:70605,UNPD=UNPD177889	HMDB=HMDB0034142,FooDB=FDB012417,UNPD=UNPD6275	C24H30O5	C24H30O5	C24H30O5	5.8588	5.8515	5.848
Negative	397.214	13.47	186.27249:82 337.40845:91	[M-H]-			yes	0.0076312	-7.73	0.00020578	-6.9205	Other	Phenylpiperidines	Corynanthean-type alkaloids	Morphinans	N-(1-adamantyl)-4-(1,3-benzodioxol-5-yl)-4-hydroxy-1-piperidinecarboxamide	Mitragynine	Pholcodine	ChEBI=CHEBI:114774	HMDB=HMDB0041933,KNApSAcK=C00001751;C00025209;C00025211,ChEBI=CHEBI:6956,UNPD=UNPD100093;UNPD119859;UNPD122607;UNPD182349;UNPD51176;UNPD71492;UNPD89656;UNPD222258;UNPD226446	HMDB=HMDB0041984,ChEBI=CHEBI:53579,STOFF=STOFF_8410	C23H30N2O4	C23H30N2O4	C23H30N2O4	6.9481	6.8938	6.8073
Positive	398.314	8.97	121.18045:214 123.05473:166 125.01221:169 135.0731:507 137.06212:90 138.90111:152 144.04739:466 149.03891:487 150.828:55 152.97328:278 157.05731:338 163.181:575 167.18646:331 171.15346:52 177.14413:151 181.00244:346 195.01396:87 199.08229:108 212.95894:166 219.05264:1247 226.96631:180 237.1322:1586 241.14618:214 254.48419:115 255.16998:367 269.10007:629 283.07098:442 297.03702:95 339.19296:812 38…	[M+H]+			yes	0.0053805	-8.7314	0.0065472	-5.7438	No annotation
Negative	398.885	15.18	210.02747:72 210.97729:259 303.03259:2024 304.10767:7286 304.94919:42164 305.8764:220 380.73315:382 381.76135:217	[M-H]-				0.050365	5.9804	0.15391	4.7696	No annotation
Positive	400.33	9.56	122.99695:175 136.93378:64 144.1044:166 238.42252:87 239.11871:912 257.24551:117 297.39514:52 341.09149:1971 372.78244:121 381.09964:94 381.96399:80	[M+H]+			yes	0.00094528	-5.4648	0.0069811	-8.1812	No annotation
Negative	400.909	16.26	152.93677:146 154.95639:141 205.01752:301 248.97601:23198 265.03903:83	[M-H]-			yes	8.0715e-05	9.0532	0.003715	10.882	No annotation
Negative	401.09	19.76	226.97922:711 248.97687:113 287.11221:3467	[M-H]-			yes	0.024379	4.4741	7.2004e-05	5.6676	Flavonoid-like	Flavonoid 8-C-glycosides	Anthraquinones	7-O-methylated flavonoids	5,7-dihydroxy-2-(4-hydroxyphenyl)-8-(3,4,5-trihydroxyoxan-2-yl)-4H-chromen-4-one	1-hydroxy-2-(beta-D-glucosyloxy)-9,10-anthraquinone	Gossypetin 3,7,3'-trimethyl ether 8-acetate	HMDB=HMDB0127225,KNApSAcK=C00006080,LipidMAPS=LMPK12110197,UNPD=UNPD179534	ChEBI=CHEBI:17770,LipidMAPS=LMFA13010061,UNPD=UNPD105325	KNApSAcK=C00004941,LipidMAPS=LMPK12113259,UNPD=UNPD37187	C20H18O9	C20H18O9	C20H18O9	8.0048	7.9312	7.6821
Negative	401.13	19.28	332.87216:79 339.30261:148 340.94934:245899 377.22675:67	[M-H]-			yes	0.01445	-11.81	0.0051244	-14.84	Flavonoid-like	8-O-methylated flavonoids	7-O-methylated flavonoids	8-O-methylated flavonoids	Nobiletin	Hexamethylquercetagetin	3,3',4',5,7,8-Hexamethoxyflavone	HMDB=HMDB0029540,KNApSAcK=C00001076,ChEBI=CHEBI:7602,FooDB=FDB000683,NANPDB=NANPDB_62,LipidMAPS=LMPK12111468,UNPD=UNPD118756	HMDB=HMDB0029308,KNApSAcK=C00004713,ChEBI=CHEBI:93682,FooDB=FDB000219;FDB000364,NANPDB=NANPDB_5846;NANPDB_6142,LipidMAPS=LMPK12113018,UNPD=UNPD112590	HMDB=HMDB0037755,KNApSAcK=C00004745,FooDB=FDB016894,LipidMAPS=LMPK12113255,UNPD=UNPD87984	C21H22O8	C21H22O8	C21H22O8	7.7189	7.7104	7.2937
Negative	403.307	5.39	223.1568:68 304.7168:573 320.88052:264	[M-H]-			yes	0.00062123	-9.9837	0.005535	-9.7538	Fatty acid	Long-chain fatty alcohols	Very long-chain fatty acids		(3S,5R,10R,12S,14S,15R,16R)-3,5,10,14,15-pentahydroxy-12,16-dimethylicosan-2-one	Ventosic acid		ChEBI=CHEBI:133941	LipidMAPS=LMFA01050536		C22H44O6	C22H44O6		5.9141	5.913
Negative	404.105	19.26	342.06046:197 343.07861:247 344.06326:675	[M-H]-			yes	6.1323e-05	-10.103	5.7606e-05	-10.259	Peptide	Oligopeptides	Phenylpyrazoles	Dimethoxybenzenes	S-(2-carboxy-2-methylbut-3-en-2-yl)glutathione(2-)	3-(1,3-benzodioxol-5-yl)-N-[2-(4-methylphenyl)-4,6-dihydrothieno[3,4-c]pyrazol-3-yl]-2-propenamide	N-[1-(1H-benzimidazol-2-yl)-2-thiophen-2-ylethenyl]-3,4-dimethoxybenzamide	ChEBI=CHEBI:131797;CHEBI:132118	ChEBI=CHEBI:105702	ChEBI=CHEBI:116123	C15H23N3O8S	C22H19N3O3S	C22H19N3O3S	7.2113	7.0992	7.0327
Negative	410.222	5.41	372.17038:64	[M-H]-			yes	0.00042866	-10.37	0.00016506	-8.1216	Alkaloide	Alkaloids and derivatives	1-alkyl,2-acetylglycero-3-phosphocholines	1-acyl-sn-glycero-3-phosphoethanolamines	Lasiocarpine	PC(O-8:0/2:0)	PE(13:0/0:0)	KNApSAcK=C00002097,ChEBI=CHEBI:6382,T3DB=T3D4078,UNPD=UNPD118025;UNPD146847;UNPD152491;UNPD196852	LipidMAPS=LMGP01020129	LipidMAPS=LMGP02050007	C21H33NO7	C18H38NO7P	C18H38NO7P	6.3898	4.6897	4.6897
Positive	414.214	5.41	396.30182:89	[M+H]+			yes	0.00011846	-10.284	6.1414e-06	-10.499	Other	Pyrazinecarboxamides	C-glycosyl compounds	Dialkylarylamines	N-[(2S,3R)-5-[(2S)-1-hydroxypropan-2-yl]-3-methyl-2-(methylaminomethyl)-6-oxo-3,4-dihydro-2H-1,5-benzoxazocin-10-yl]-2-pyrazinecarboxamide	1-[(2S,3S,6S)-2-(hydroxymethyl)-6-[2-[(phenylmethyl)sulfonylamino]ethyl]-3-oxanyl]-3-propan-2-ylurea	N-[[(2R,3R)-8-(dimethylamino)-5-[(2S)-1-hydroxypropan-2-yl]-3-methyl-6-oxo-3,4-dihydro-2H-1,5-benzoxazocin-2-yl]methyl]-N-methylmethanesulfonamide	ChEBI=CHEBI:108647;CHEBI:108787;CHEBI:108915;CHEBI:111580;CHEBI:111609;CHEBI:111654;CHEBI:113573;CHEBI:113685	ChEBI=CHEBI:120157;CHEBI:120194;CHEBI:120259;CHEBI:120323	ChEBI=CHEBI:124117;CHEBI:124370;CHEBI:124902	C21H27N5O4	C19H31N3O5S	C19H31N3O5S	7.7288	7.4034	7.3943
Positive	415.199	8.16	118.97652:2809 126.89114:235 132.98848:364 151.10342:107 246.85596:202 259.07675:85 277.02368:295 279.09177:146 295.01453:647 379.34503:65 397.19937:297	[M+H]+			yes	0.0042689	-9.1924	0.0033864	-9.2519	Other	Morphinans	Morphinans	Oligopeptides	Naltrindole	LSM-1793	Ala-Asn-Asn-Pro	ChEBI=CHEBI:81528;CHEBI:91903;CHEBI:94384	ChEBI=CHEBI:91867	ChEBI=CHEBI:73326	C26H26N2O3	C26H26N2O3	C16H26N6O7	7.1741	7.1647	6.4371
Positive	415.21	5.57	119.35223:3628 120.07149:99 127.40636:195 133.39304:425 145.13174:58 151.40086:112 246.96539:211 251.26877:96 258.75412:71 276.94312:454 279.02545:169 294.06735:54 295.04926:951 397.14944:504	[M+H]+			yes	0.00056165	-9.7496	0.0037935	-9.9311	Other	Spironolactones and derivatives	Linear pyranocoumarins	Melleolides and analogues	Eplerenone	Clausarinol	Armillarin	HMDB=HMDB0014838,ChEBI=CHEBI:31547;CHEBI:91683,DrugBank=DB00700,SMPDB=PW_C009176,STOFF=STOFF_5114,Urine=HMDB0014838,Serum=HMDB0014838	HMDB=HMDB0041407,FooDB=FDB021349,UNPD=UNPD74620	HMDB=HMDB0039380,FooDB=FDB018945,UNPD=UNPD25702	C24H30O6	C24H30O6	C24H30O6	6.8107	6.5739	6.3992
Positive	415.211	1.92	117.11965:56 119.00978:10438 127.06476:977 133.03471:2016 145.06717:226 151.09636:527 171.12024:77 187.06177:82 199.10782:122 211.18913:61 216.84097:133 227.44498:56 228.62466:113 235.15839:73 247.09445:484 251.21912:217 259.15894:217 277.17014:1140 279.24393:574 295.03613:3308 327.05493:80 338.30695:63 397.29111:501 398.17114:80	[M+H]+			yes	0.0052711	11.86	5.297e-05	12.28	Other	Spironolactones and derivatives	Melleolides and analogues	Melleolides and analogues	Eplerenone	Armillarin	Armillaripin	HMDB=HMDB0014838,ChEBI=CHEBI:31547;CHEBI:91683,DrugBank=DB00700,SMPDB=PW_C009176,STOFF=STOFF_5114,Urine=HMDB0014838,Serum=HMDB0014838	HMDB=HMDB0039380,FooDB=FDB018945,UNPD=UNPD25702	HMDB=HMDB0030404,FooDB=FDB002265,UNPD=UNPD45602	C24H30O6	C24H30O6	C24H30O6	7.9911	7.7875	7.7636
Negative	417.156	5.91	281.25333:472 289.05814:66	[M-H]-				0.075999	-8.8252	0.16451	-8.0918	Organic acid	Tricarboxylic acids and derivatives	Azaphilones	Azaphilones	Liatrin	comazaphilone B	comazaphilone F	KNApSAcK=C00003315,ChEBI=CHEBI:6449,UNPD=UNPD74364	ChEBI=CHEBI:70011,UNPD=UNPD200027	ChEBI=CHEBI:70015,UNPD=UNPD200026	C22H26O8	C22H26O8	C22H26O8	8.0166	7.955	7.954
Negative	417.322	5.38	283.32428:107 288.96255:56 335.02313:514	[M-H]-			yes	0.000554	-13.61	0.0071794	-13.432	Terpenoid	Triterpenoids	Triterpenoids		8'-apo-beta-carotenol	beta-Citraurinene		ChEBI=CHEBI:18092,FooDB=FDB021728,LipidMAPS=LMPR01070298,UNPD=UNPD141531	HMDB=HMDB0035686,FooDB=FDB014403,UNPD=UNPD176043;UNPD50878		C30H42O	C30H42O		6.837	6.0922
Positive	421.304	7.82	125.03149:66 125.96469:250 127.07236:159 191.14868:89 208.96628:3201 210.12047:872 218.08153:517 219.06645:914 228.04599:179 257.08847:145 274.06146:149 275.18668:2217 292.21024:2348 293.21173:5703 302.10498:13580 302.974:64 343.27716:151 358.19196:1196	[M+H]+			yes	3.1713e-06	-9.7388	4.035e-05	-7.039	Terpenoid	Diterpene lactones	Diterpene lactones	Dihydroxy bile acids, alcohols and derivatives	Aplysinoplide C;(+)-Aplysinoplide C	Hippolide G	Homodeoxycholic acid	KNApSAcK=C00038480,ChEBI=CHEBI:65420,UNPD=UNPD29594	ChEBI=CHEBI:67738,UNPD=UNPD201598	LipidMAPS=LMST04070031	C25H40O5	C25H40O5	C25H40O5	6.6749	6.6406	6.5996
Negative	423.421	4.69	405.43167:174	[M-H]-			yes	0.001154	-8.1993	0.0030307	-7.8269	Fatty acid	Very long-chain fatty acids	Very long-chain fatty acids	Very long-chain fatty acids	Octacosanoic acid	26-methylheptacosanoic acid	Mycocerosic acid (C28)	HMDB=HMDB0002348,ChEBI=CHEBI:31001;CHEBI:31002,FooDB=FDB007128,BMDB=BMDB02348,LipidMAPS=LMFA01010028,PlantCyc=CPD-7833,UNPD=UNPD161357	ChEBI=CHEBI:84907,LipidMAPS=LMFA01020026,UNPD=UNPD179233	LipidMAPS=LMFA01020312	C28H56O2	C28H56O2	C28H56O2	8.8101	8.39	7.9702
Positive	425.201	10.45	207.07588:380 236.95084:50 239.03384:194 281.01379:1070 308.96454:533 327.14563:300 365.12048:10943 369.02164:430 407.03323:544 408.08545:93	[M+H]+			yes	0.001401	-5.6324	0.00076312	-9.2663	Other	8-prenylated flavanones	2'-prenylated flavanones	6-prenylated flavanones	(S)-3',4',5,7-Tetrahydroxy-5',8-diprenylflavanone	Sigmoidin A	Diplacone	HMDB=HMDB0038868,KNApSAcK=C00008468,FooDB=FDB018309,LipidMAPS=LMPK12140402,UNPD=UNPD24150	KNApSAcK=C00008319,ChEBI=CHEBI:66482,LipidMAPS=LMPK12140398,UNPD=UNPD11291	KNApSAcK=C00008326,ChEBI=CHEBI:66640,LipidMAPS=LMPK12140400,UNPD=UNPD115886;UNPD216068	C25H28O6	C25H28O6	C25H28O6	8.1604	8.1604	8.1285
Negative	426.009	1.15	133.9111:2930 158.82658:387 200.0515:141 234.93567:269 236.03238:103 272.88068:136 290.89035:167 322.22784:58 327.91565:7766 337.01959:268 341.05743:461 408.01898:1921	[M-H]-			yes	0.0064219	-9.3223	0.0017259	-3.3778	Nucleoside	Purine ribonucleoside monophosphates			Adenosine phosphosulfate			HMDB=HMDB0001003,KNApSAcK=C00007445,ChEBI=CHEBI:17709;CHEBI:58243,DrugBank=DB03708,SMPDB=PW_C000793,YMDB=YMDB00256,FooDB=FDB022362;FDB030652,BMDB=BMDB01003,ECMDB=ECMDB01003,PubChem=49852317;10238,PlantCyc=APS			C10H14N5O10PS			8.1319
Positive	426.345	9.69	135.10301:109 139.10954:65 148.93056:139 153.21735:62 157.08061:135 163.06923:53 167.2955:145 177.10355:99 191.09891:86 209.0107:100 223.34908:67 227.09454:88 241.05475:106 247.21109:239 255.10281:206 265.21262:223 268.74417:106 282.90891:69 297.11261:114 311.15558:115 313.4548:63 342.97815:60 366.87656:149 407.47382:53 408.28369:72	[M+H]+			yes	0.016174	-8.9013	0.0074484	-8.021	Other	Vitamin D and derivatives			3-Deoxy-3-azido-25-hydroxyvitamin D3			LipidMAPS=LMST03020677			C27H43N3O			6.3515
Positive	430.913	16.4	158.95059:3281 294.92758:413	[M+H]+			yes	0.0011088	11.121	0.0029671	10.139	No annotation
Negative	431.374	5.35	253.21616:52	[M-H]-			yes	0.00036562	-9.0577	0.00052806	-9.039	Other	3-amino-22,26-epiminocholestanes			Solacapine			KNApSAcK=C00002259,ChEBI=CHEBI:9184,UNPD=UNPD126979;UNPD21678;UNPD36138;UNPD47918			C27H48N2O2			6.3098
Positive	432.171	12.87	126.98087:380 144.97362:438 162.86191:485 246.892:57 252.01422:1980 258.8226:306 269.98999:3767 271.12543:63 276.89166:101 288.92044:1366 306.50641:228 307.10931:255 323.8425:132 324.86322:2961 342.05353:83 342.81924:469 413.97012:1653	[M+H]+			yes	0.00036562	11.785	0.0031317	12.117	Other	Alkyl-phenylketones	Stilbenes	Phenyltetrazoles and derivatives	Pseurotin A;(-)-Pseurotin A	Oxynarcotine	2,5-diethoxy-N-[2-(2-methylphenyl)ethyl]-4-(1-tetrazolyl)benzenesulfonamide	KNApSAcK=C00045032;C00047550,ChEBI=CHEBI:64535,UNPD=UNPD133892;UNPD147387;UNPD172514;UNPD200915	HMDB=HMDB0030247,FooDB=FDB002070,UNPD=UNPD93576	ChEBI=CHEBI:105917	C22H25NO8	C22H25NO8	C20H25N5O4S	7.0513	6.5648	6.1652
Negative	434.266	5.43	285.15808:78 374.12003:597543 375.16028:844	[M-H]-			yes	0.00203	-14.398	0.00040371	-14.718	Other	Macrolactams	Macrolactams	Acyclic diterpenoids	2-methoxy-N-[(5R,6S,9R)-5-methoxy-3,6,9-trimethyl-2-oxo-8-propyl-11-oxa-3,8-diazabicyclo[10.4.0]hexadeca-1(12),13,15-trien-14-yl]acetamide	2-methoxy-N-[(4R,7S,8R)-8-methoxy-4,7,10-trimethyl-11-oxo-5-propyl-2-oxa-5,10-diazabicyclo[10.4.0]hexadeca-1(12),13,15-trien-14-yl]acetamide	(2R)-2-acetamido-3-(3,7,11,15-tetramethylhexadeca-2,6,10,14-tetraenylthio)propanoic acid	ChEBI=CHEBI:115753;CHEBI:115858;CHEBI:115901;CHEBI:115936;CHEBI:115942;CHEBI:115977;CHEBI:116003	ChEBI=CHEBI:104290;CHEBI:104321;CHEBI:104356;CHEBI:104407;CHEBI:104417;CHEBI:104430;CHEBI:104461	ChEBI=CHEBI:94737,PlantCyc=CPD-12753	C23H37N3O5	C23H37N3O5	C25H41NO3S	7.3469	7.3469	7.1801
Negative	450.248	8.57	195.99466:172 214.06595:713 253.15826:45034 253.80731:193 430.84946:199	[M-H]-			yes	0.00096974	-12.274	0.0020021	-11.943	Other	Alkyl aryl ethers	Alpha amino acid amides	Alpha amino acid amides	(2S,3S)-5-[(2R)-1-hydroxypropan-2-yl]-3-methyl-8-(3-methylbut-1-ynyl)-2-[[methyl(5-pyrimidinylmethyl)amino]methyl]-3,4-dihydro-2H-pyrido[2,3-b][1,5]oxazocin-6-one	(2S,3S,3aR,9bR)-3-(hydroxymethyl)-6-oxo-N-(2-piperidin-1-ylethyl)-1-(pyridin-2-ylmethyl)-3,3a,4,9b-tetrahydro-2H-pyrrolo[2,3-a]indolizine-2-carboxamide	2-(butylamino)-N-[4-[5-[[2-(butylamino)-1-oxoethyl]amino]-1,3-benzoxazol-2-yl]phenyl]acetamide	ChEBI=CHEBI:95765;CHEBI:96129;CHEBI:96174;CHEBI:96240;CHEBI:96288;CHEBI:96516;CHEBI:96693;CHEBI:96696	ChEBI=CHEBI:97695;CHEBI:97970	ChEBI=CHEBI:109590	C25H33N5O3	C25H33N5O3	C25H33N5O3	7.8329	7.7	7.6164
Negative	450.263	7.76	140.35358:51 196.05611:953 214.21654:692 253.26166:55398 254.10098:220 422.39017:79	[M-H]-			yes	0.00022362	-11.615	0.0051751	-7.4334	Phospholipid	2-acyl-sn-glycero-3-phosphoethanolamines	1-acyl-sn-glycero-3-phosphoethanolamines	1-alkyl,2-acetylglycero-3-phosphocholines	LysoPE(0:0/16:1(9Z))	LysoPE(16:1(9Z)/0:0)	PC(O-11:1(10E)/2:0)	HMDB=HMDB0011474,FooDB=FDB028190,BMDB=BMDB11474,LipidMAPS=LMGP02050037	HMDB=HMDB0011504,YMDB=YMDB01201,FooDB=FDB028220,BMDB=BMDB11504,LipidMAPS=LMGP02050010	LipidMAPS=LMGP01020146	C21H42NO7P	C21H42NO7P	C21H42NO7P	8.0163	8.0128	7.5491
Negative	452.264	9.54	140.0676:114 195.94429:1593 214.05734:906 255.18637:70728 391.04169:312	[M-H]-			yes	0.0041254	-12.714	0.0022953	-4.3513	Terpenoid	Aconitane-type diterpenoid alkaloids	Pyrrole 2-carboxylic acids	Macrolactams	Delcosine	2,5-bis(5-carboxy-3-ethyl-4-methylpyrrol-2-ylmethyl)-3,4-diethylpyrrole	N-[(5R,6R,9S)-5-methoxy-3,6,8,9-tetramethyl-2-oxo-11-oxa-3,8-diazabicyclo[10.4.0]hexadeca-1(12),13,15-trien-14-yl]-2-phenylacetamide	KNApSAcK=C00001632,ChEBI=CHEBI:4381,UNPD=UNPD171685;UNPD18319;UNPD190430;UNPD72181;UNPD97892	ChEBI=CHEBI:59935	ChEBI=CHEBI:111835;CHEBI:111846;CHEBI:112005;CHEBI:112017;CHEBI:112079;CHEBI:112082;CHEBI:112097	C24H39NO7	C26H35N3O4	C26H35N3O4	7.6301	7.3252	7.1211
Positive	452.276	7.75	237.23032:120 280.30072:133 311.18756:9777 390.56879:234 391.24939:190 417.12869:56 433.92819:7567 434.98392:220	[M+H]+			yes	3.1713e-06	-9.5767	0.0027926	-7.2405	Phospholipid	2-acyl-sn-glycero-3-phosphoethanolamines	1-acyl-sn-glycero-3-phosphoethanolamines	1-alkyl,2-acetylglycero-3-phosphocholines	LysoPE(0:0/16:1(9Z))	LysoPE(16:1(9Z)/0:0)	PC(O-11:1(10E)/2:0)	HMDB=HMDB0011474,FooDB=FDB028190,BMDB=BMDB11474,LipidMAPS=LMGP02050037	HMDB=HMDB0011504,YMDB=YMDB01201,FooDB=FDB028220,BMDB=BMDB11504,LipidMAPS=LMGP02050010	LipidMAPS=LMGP01020146	C21H42NO7P	C21H42NO7P	C21H42NO7P	6.0649	6.0633	5.5842
Positive	454.279	9.54	282.24429:95 313.27063:8496 340.93689:345 393.05441:522 436.07315:11611 437.02927:126	[M+H]+			yes	0.0039599	-10.263	0.0021233	-10.08	Terpenoid	Aconitane-type diterpenoid alkaloids	Macrolactams	Macrolactams	Delcosine	N-[(5R,6R,9S)-5-methoxy-3,6,8,9-tetramethyl-2-oxo-11-oxa-3,8-diazabicyclo[10.4.0]hexadeca-1(12),13,15-trien-14-yl]-2-phenylacetamide	N-[(4S,7R,8S)-8-methoxy-4,5,7,10-tetramethyl-11-oxo-2-oxa-5,10-diazabicyclo[10.4.0]hexadeca-1(12),13,15-trien-14-yl]-2-phenylacetamide	KNApSAcK=C00001632,ChEBI=CHEBI:4381,UNPD=UNPD171685;UNPD18319;UNPD190430;UNPD72181;UNPD97892	ChEBI=CHEBI:111835;CHEBI:111846;CHEBI:112005;CHEBI:112017;CHEBI:112079;CHEBI:112082;CHEBI:112097	ChEBI=CHEBI:115771;CHEBI:115807;CHEBI:115832;CHEBI:115863;CHEBI:115866;CHEBI:115890;CHEBI:115938;CHEBI:115970	C24H39NO7	C26H35N3O4	C26H35N3O4	7.2217	6.8013	6.8013
Negative	455.101	12.58	274.83984:86 341.05231:752	[M-H]-			yes	9.6683e-05	16.339	0.00040635	16.609	Nucleotide	Flavin nucleotides	8-O-methylated flavonoids	Saccharolipids	Flavin Mononucleotide	3,5,7-Tris(acetyloxy)-8-methoxy-2-(4-methoxyphenyl)-4H-1-benzopyran-4-one	3,4,5-trihydroxy-6-{1-methoxy-1,3-dioxo-3-[(3,4,5,6-tetrahydroxyoxan-2-yl)methoxy]propan-2-yl}oxane-2-carboxylic acid	HMDB=HMDB0001520,KNApSAcK=C00019686,ChEBI=CHEBI:17621,DrugBank=DB03247,SMPDB=PW_C001170,YMDB=YMDB00085,FooDB=FDB001984;FDB030862,BMDB=BMDB01520,ECMDB=ECMDB01520,Serum=HMDB0001520,PubChem=44229199;643976;710,UNPD=UNPD4450	KNApSAcK=C00013545,LipidMAPS=LMPK12113172	HMDB=HMDB0130025	C17H21N4O9P	C23H20O10	C16H24O15	6.4566	6.3307	6.1804
Positive	458.173	0.89	296.04532:66 421.99905:69	[M+H]+			yes	0.0017894	-10.648	9.1383e-05	-11.008	Other	Dihydrofolic acids and derivatives	Tetrahydrofolic acids	Cyanogenic glycosides	5-Methyldihydrofolic acid	5,10-Methylene-THF	Amygdalin	HMDB=HMDB0006486,ChEBI=CHEBI:134470,FooDB=FDB023936,BMDB=BMDB06486	HMDB=HMDB0001533,KNApSAcK=C00007250,ChEBI=CHEBI:15636;CHEBI:1989;CHEBI:12071;CHEBI:20502,SMPDB=PW_C001178,YMDB=YMDB00260;YMDB00848,FooDB=FDB022675;FDB030554,BMDB=BMDB01533,ECMDB=ECMDB01354,Serum=HMDB0001533,PubChem=11966313;9955633;9548565;445117;439175;108194,PlantCyc=METHYLENE-THF	HMDB=HMDB0035030,KNApSAcK=C00001437,ChEBI=CHEBI:17019;CHEBI:27613,T3DB=T3D0813,FooDB=FDB013636,PubChem=656516;34751,PlantCyc=CPD-1125,UNPD=UNPD53722;UNPD72395	C20H23N7O6	C20H23N7O6	C20H27NO11	8.0133	8.0046	7.6443
Positive	463.313	7.83	376.12949:52170 377.40463:62 389.57254:76 390.77786:57 391.89578:111 392.89578:93 396.11862:53 407.06088:78 444.83221:59	[M+H]+			yes	3.1713e-06	-9.0582	1.8932e-05	-9.3201	Other	Tetrahydroxy bile acids, alcohols and derivatives	Cholesterols and derivatives	Tetrahydroxy bile acids, alcohols and derivatives	2-dehydroecdysone	shidasterone	3-dehydroecdysone	ChEBI=CHEBI:19544,LipidMAPS=LMST01010180	ChEBI=CHEBI:26661,LipidMAPS=LMST01010193,UNPD=UNPD100936;UNPD105142	ChEBI=CHEBI:17058,LipidMAPS=LMST01010172,PubChem=5460083;439743	C27H42O6	C27H42O6	C27H42O6	8.0228	7.9348	7.8788
Positive	469.372	10.8	283.02786:245 284.21939:66 309.36746:51 451.10492:795 452.12048:85	[M+H]+			yes	0.0014273	-8.9946	0.0016902	-7.1161	Other	Vitamin K compounds	Monohydroxy bile acids, alcohols and derivatives	Vitamin D and derivatives	3-hydroxy-2-methyl-3-phytyl-2,3-dihydro-1,4-naphthoquinone	Dehydroeburicoic acid	1alpha,25-dihydroxy-26,27-dimethyl-22,22,23,23-tetradehydro-24a,24b-dihomovitamin D3 / 1alpha,25-dihydroxy-26,27-dimethyl-22,22,23,23-tetradehydro-24a,24b-dihomocholecalciferol	ChEBI=CHEBI:18298,LipidMAPS=LMPR02030029	KNApSAcK=C00023803,ChEBI=CHEBI:80817,UNPD=UNPD129222;UNPD65702;UNPD73588	LipidMAPS=LMST03020483;LMST03020484	C31H48O3	C31H48O3	C31H48O3	6.9947	6.5724	6.5062
Negative	471.442	5.25	397.09348:162	[M-H]-			yes	0.0083398	-8.1998	9.6008e-05	-8.6138	No annotation
Negative	473.218	5.57	205.35741:85 457.16916:158 457.95596:80	[M-H]-			yes	0.00072024	-7.0781	0.00073976	-8.9642	Other	Gluco/mineralocorticoids, progestogins and derivatives	Alkyl-phenylketones	Tricarboxylic acids and derivatives	methylprednisolone succinate	Agrimophol	Athrolide D, (rel)-	ChEBI=CHEBI:135765,STOFF=STOFF_9455	KNApSAcK=C00002688,ChEBI=CHEBI:2518,UNPD=UNPD30008;UNPD66989	ChEBI=CHEBI:69661,UNPD=UNPD203975	C26H34O8	C26H34O8	C26H34O8	6.5149	6.159	6.1576
Negative	473.267	10.03	188.99747:62 205.09731:2849 206.19058:123 251.1835:51 267.06262:507 372.97095:90 401.16629:98 415.33398:73 416.19595:81 443.22565:621 444.11777:60 453.00009:191 457.202:6146 458.28036:1864 459.27353:89	[M-H]-			yes	0.0047665	-10.313	0.00028792	-10.454	Other	Trihydroxy bile acids, alcohols and derivatives	Terpene lactones	Hybrid peptides	3alpha,7alpha,12alpha-trihydroxy-5alpha-cholan-24-yl sulfate	Biyouyanagin B	Amastatin	ChEBI=CHEBI:50109;CHEBI:58809,LipidMAPS=LMST05020018,UNPD=UNPD163920;UNPD81309	KNApSAcK=C00047762,ChEBI=CHEBI:65510,UNPD=UNPD136982;UNPD91370	KNApSAcK=C00018188,ChEBI=CHEBI:2624	C24H42O7S	C31H38O4	C21H38N4O8	7.7346	7.413	7.3318
Negative	473.283	4.26	189.39151:183 205.28453:7880 206.3418:1371 211.34703:89 251.21585:222 252.36224:120 267.18405:2388 268.17484:201 387.49405:96 397.32907:91 401.14029:332 401.9209:223 415.15997:221 416.15872:274 417.09879:190 443.07004:1846 444.07645:753 457.1232:18649 458.12674:8134 459.20969:758	[M-H]-			yes	0.0019419	-10.09	0.0005359	-8.9094	Other	Naphthopyrans	Scalarane sesterterpenoids	Scalarane sesterterpenoids	candelalide B	12-O-acetyl-16-O-methylhyrtiolide	rel-(3R,4R,5aS,5bR,7aS,11aS,11bR,13R,13aS)-3-hydroxy-4-methoxy-5b,8,8,11a,13a-pentamethyl-1-oxo-1,3,4,5,5a,5b,6,7,7a,8,9,10,11,11a,11b,12,13,13a-octadecahydrochryseno[2,1-c]furan-13-yl acetate	ChEBI=CHEBI:65572,UNPD=UNPD18502	ChEBI=CHEBI:68039,UNPD=UNPD99676	ChEBI=CHEBI:68045,UNPD=UNPD172955;UNPD177399	C28H42O6	C28H42O6	C28H42O6	7.3284	7.2495	7.2495
Negative	476.263	9.1	140.06461:56 195.9314:1167 214.0123:955 261.1467:223 279.19489:66644 407.47208:69 415.05457:248 455.14218:56	[M-H]-			yes	0.0032757	-12.689	0.0031919	-12.086	Other	Macrolactams	Macrolactams	Biphenyls and derivatives	3-(3,5-dimethyl-4-isoxazolyl)-1-[[(8S,9S)-6-[(2R)-1-hydroxypropan-2-yl]-8-methyl-5-oxo-10-oxa-1,6,14,15-tetrazabicyclo[10.3.0]pentadeca-12,14-dien-9-yl]methyl]-1-methylurea	3-(3,5-dimethyl-4-isoxazolyl)-1-[[(8S,9R)-6-[(2S)-1-hydroxypropan-2-yl]-8-methyl-5-oxo-10-oxa-1,6,13,14-tetrazabicyclo[10.2.1]pentadeca-12(15),13-dien-9-yl]methyl]-1-methylurea	N-[(2R,3R,6R)-2-(hydroxymethyl)-6-[2-oxo-2-(4-phenylanilino)ethyl]-3,6-dihydro-2H-pyran-3-yl]-3-(1-piperidinyl)propanamide	ChEBI=CHEBI:96813;CHEBI:96933;CHEBI:112459;CHEBI:112523;CHEBI:112538;CHEBI:112588;CHEBI:112630;CHEBI:112645	ChEBI=CHEBI:95531;CHEBI:95581;CHEBI:95756;CHEBI:96271;CHEBI:96568;CHEBI:112499;CHEBI:112527;CHEBI:112655	ChEBI=CHEBI:118846;CHEBI:118865;CHEBI:118867;CHEBI:118919;CHEBI:119082;CHEBI:119114	C22H35N7O5	C22H35N7O5	C28H35N3O4	7.6859	7.6753	7.3916
Negative	476.279	13.45	196.29471:365 214.18639:111 255.2388:72 277.46182:107 279.27753:15417 280.25504:109 388.0939:63	[M-H]-			yes	0.0023759	-8.8827	0.0050969	-8.3736	Phospholipid	2-acyl-sn-glycero-3-phosphoethanolamines	1-acyl-sn-glycero-3-phosphoethanolamines	Biphenyls and derivatives	LysoPE(0:0/18:2(9Z,12Z))	LysoPE(18:2(9Z,12Z)/0:0)	7-[(1R,2R,3S,5S)-3-hydroxy-5-[(4-phenylphenyl)methoxy]-2-(1-piperidinyl)cyclopentyl]-4-heptenoic acid	HMDB=HMDB0011477,ChEBI=CHEBI:76090;CHEBI:76233,FooDB=FDB028193,BMDB=BMDB11477,LipidMAPS=LMGP02050041	HMDB=HMDB0011507,ChEBI=CHEBI:83058,FooDB=FDB028223,BMDB=BMDB11507,LipidMAPS=LMGP02050011,Feces=HMDB0011507	ChEBI=CHEBI:92041	C23H44NO7P	C23H44NO7P	C30H39NO4	8.4301	8.4268	7.2765
Positive	478.278	9.09	154.901:111 216.03458:60 245.16791:208 263.15771:504 306.36661:233 319.1734:70 337.16495:8742 417.05374:672 419.24484:74 460.06229:11354 460.86026:54	[M+H]+			yes	0.0053994	-10.385	0.00048994	-9.7676	Organic acid	Indolecarboxylic acids and derivatives	Benzamides	Anisoles	LSM-30675	N-[[(2S,3S)-8-(1-cyclohexenyl)-5-[(2S)-1-hydroxypropan-2-yl]-3-methyl-6-oxo-3,4-dihydro-2H-pyrido[2,3-b][1,5]oxazocin-2-yl]methyl]-N-methylbenzamide	(2R,3S)-2-[[cyclopropylmethyl(methyl)amino]methyl]-5-[(2S)-1-hydroxypropan-2-yl]-8-[2-(4-methoxyphenyl)ethynyl]-3-methyl-3,4-dihydro-2H-pyrido[2,3-b][1,5]oxazocin-6-one	ChEBI=CHEBI:119226;CHEBI:119254;CHEBI:119269;CHEBI:119342;CHEBI:119361;CHEBI:119431;CHEBI:119465	ChEBI=CHEBI:130412	ChEBI=CHEBI:129037	C28H35N3O4	C28H35N3O4	C28H35N3O4	7.2777	7.2361	7.233
Negative	478.279	9.59	139.9229:51 196.0921:113 213.95999:734 281.21808:71245 337.1535:70 351.06516:108	[M-H]-			yes	0.001854	-12.704	0.0019004	-4.1943	Other	Biphenyls and derivatives	Macrolactams	Macrolactams	N-[(2R,3R,6R)-2-(hydroxymethyl)-6-[2-oxo-2-(4-phenylanilino)ethyl]-3-oxanyl]-3-(1-piperidinyl)propanamide	N-[(4S,7R,8R)-5-(cyclopropylmethyl)-8-methoxy-4,7,10-trimethyl-11-oxo-2-oxa-5,10-diazabicyclo[10.4.0]hexadeca-1(12),13,15-trien-14-yl]benzamide	N-[(4R,7R,8R)-8-methoxy-4,7,10-trimethyl-11-oxo-5-(phenylmethyl)-2-oxa-5,10-diazabicyclo[10.4.0]hexadeca-1(12),13,15-trien-14-yl]cyclopropanecarboxamide	ChEBI=CHEBI:120193;CHEBI:120199;CHEBI:120246;CHEBI:120247;CHEBI:120328	ChEBI=CHEBI:104286;CHEBI:104294;CHEBI:104304;CHEBI:104421;CHEBI:104459;CHEBI:104480;CHEBI:104517;CHEBI:104529	ChEBI=CHEBI:106410;CHEBI:106434;CHEBI:106442;CHEBI:106457;CHEBI:106468;CHEBI:106591;CHEBI:106601;CHEBI:106637	C28H37N3O4	C28H37N3O4	C28H37N3O4	7.7183	7.5369	7.361
Negative	478.294	12	214.26874:291 242.1907:59 253.29654:1218 281.19427:22750 282.12253:130 351.39017:73	[M-H]-			yes	0.0023467	-8.5274	0.0079477	-7.7395	Phospholipid	2-acyl-sn-glycero-3-phosphoethanolamines	1-acyl-sn-glycero-3-phosphoethanolamines	2-acyl-sn-glycero-3-phosphoethanolamines	LysoPE(0:0/18:1(9Z))	LysoPE(18:1(9Z)/0:0)	LysoPE(0:0/18:1(11Z))	HMDB=HMDB0011476,ChEBI=CHEBI:76088;CHEBI:76231,FooDB=FDB028192,BMDB=BMDB11476,LipidMAPS=LMGP02050040	HMDB=HMDB0011506,ChEBI=CHEBI:60287;CHEBI:74971;CHEBI:75168,YMDB=YMDB01207,FooDB=FDB028222,BMDB=BMDB11506,LipidMAPS=LMGP02050004,Feces=HMDB0011506,PubChem=58177709	HMDB=HMDB0011475,FooDB=FDB028191,BMDB=BMDB11475,LipidMAPS=LMGP02050039	C23H46NO7P	C23H46NO7P	C23H46NO7P	8.9625	8.9556	8.5458
Positive	480.293	9.78	155.07217:92 180.07648:94 197.93814:82 207.27748:193 216.11237:61 265.23975:758 308.28857:1051 335.21817:113 339.17197:26999 339.7858:249 419.10123:2336 444.20172:248 462.0607:37185 474.69818:56	[M+H]+			yes	0.015713	-12.529	0.0049386	-11.716	Terpenoid	Aconitane-type diterpenoid alkaloids	Biphenyls and derivatives	Macrolactams	Delcorine	N-[(2R,3R,6R)-2-(hydroxymethyl)-6-[2-oxo-2-(4-phenylanilino)ethyl]-3-oxanyl]-3-(1-piperidinyl)propanamide	N-[(4S,7R,8R)-5-(cyclopropylmethyl)-8-methoxy-4,7,10-trimethyl-11-oxo-2-oxa-5,10-diazabicyclo[10.4.0]hexadeca-1(12),13,15-trien-14-yl]benzamide	KNApSAcK=C00001631,ChEBI=CHEBI:4380,UNPD=UNPD117435	ChEBI=CHEBI:120193;CHEBI:120199;CHEBI:120246;CHEBI:120247;CHEBI:120328	ChEBI=CHEBI:104286;CHEBI:104294;CHEBI:104304;CHEBI:104421;CHEBI:104459;CHEBI:104480;CHEBI:104517;CHEBI:104529	C26H41NO7	C28H37N3O4	C28H37N3O4	7.1017	7.0708	7.0289
Positive	480.307	7.75	155.19687:162 198.16504:196 216.34879:61 247.53145:279 265.16672:518 308.33774:505 336.9234:91 339.26862:36836 348.98273:155 418.71112:1154 419.32367:411 444.09781:120 461.96161:26971	[M+H]+			yes	0.00080287	-11.559	0.0019513	-9.6972	Phospholipid	2-acyl-sn-glycero-3-phosphoethanolamines	1-acyl-sn-glycero-3-phosphoethanolamines	2-acyl-sn-glycero-3-phosphoethanolamines	LysoPE(0:0/18:1(9Z))	LysoPE(18:1(9Z)/0:0)	LysoPE(0:0/18:1(11Z))	HMDB=HMDB0011476,ChEBI=CHEBI:76088;CHEBI:76231,FooDB=FDB028192,BMDB=BMDB11476,LipidMAPS=LMGP02050040	HMDB=HMDB0011506,ChEBI=CHEBI:60287;CHEBI:74971;CHEBI:75168,YMDB=YMDB01207,FooDB=FDB028222,BMDB=BMDB11506,LipidMAPS=LMGP02050004,Feces=HMDB0011506,PubChem=58177709	HMDB=HMDB0011475,FooDB=FDB028191,BMDB=BMDB11475,LipidMAPS=LMGP02050039	C23H46NO7P	C23H46NO7P	C23H46NO7P	7.022	7.0204	6.6054
Negative	481.242	9.21	152.82057:632 227.0905:515 245.11374:53 253.0983:11948 389.08463:245 397.07971:52 420.79865:84 452.79422:74 461.08173:226	[M-H]-			yes	0.00073489	-9.7579	0.012033	-8.7361	Steroid	Steroid glucuronide conjugates	1-acylglycerol-3-phosphates	Macrolactams	11-beta-Hydroxyandrosterone-3-glucuronide	1-(4Z,7Z,10Z,13Z,16Z,19Z-docosahexaenoyl)-glycero-3-phosphate	1-[(4S,7R,8R)-5-acetyl-8-methoxy-4,7,10-trimethyl-11-oxo-2-oxa-5,10-diazabicyclo[10.4.0]hexadeca-1(12),13,15-trien-14-yl]-3-phenylurea	HMDB=HMDB0010351,ChEBI=CHEBI:88733,FooDB=FDB027503,BMDB=BMDB10351,LipidMAPS=LMST05010030;LMST05010055,Urine=HMDB0010351,Serum=HMDB0010351	HMDB=HMDB0062307;HMDB0114755,LipidMAPS=LMGP10050019	ChEBI=CHEBI:115126;CHEBI:115130;CHEBI:115166;CHEBI:115221;CHEBI:115238;CHEBI:115304;CHEBI:115320	C25H38O9	C25H39O7P	C26H34N4O5	7.9035	7.7964	6.9766
Negative	488.238	1.88	373.59314:61	[M-H]-			yes	1.0926e-05	11.298	0.0010073	11.018	Other	Bipyridines and oligopyridines	Phenylacetamides		1-[[(2S,3S)-5-[(2R)-1-hydroxypropan-2-yl]-3-methyl-6-oxo-8-(3-pyridinyl)-3,4-dihydro-2H-pyrido[2,3-b][1,5]oxazocin-2-yl]methyl]-1-methyl-3-phenylurea	N-[[(2R,3R)-5-[(2S)-1-hydroxypropan-2-yl]-3-methyl-6-oxo-8-(5-pyrimidinyl)-3,4-dihydro-2H-pyrido[2,3-b][1,5]oxazocin-2-yl]methyl]-N-methyl-2-phenylacetamide		ChEBI=CHEBI:95638;CHEBI:95662;CHEBI:96043;CHEBI:96114;CHEBI:96298;CHEBI:96446;CHEBI:96556;CHEBI:96687	ChEBI=CHEBI:106095;CHEBI:106099;CHEBI:106145;CHEBI:106220;CHEBI:106275;CHEBI:106280;CHEBI:106355;CHEBI:131242		C27H31N5O4	C27H31N5O4		3.9177	3.9177
Negative	492.165	7.82	408.15341:66	[M-H]-			yes	0.00044173	-10.198	1.1963e-05	-10.722	Other	Phenylnaphthalenes	Phenylnaphthalenes	Peptides	dasabuvir(1-)	dasabuvir	Aspoxicillin	ChEBI=CHEBI:85181	ChEBI=CHEBI:85182,STOFF=STOFF_9076	ChEBI=CHEBI:31240	C26H27N3O5S	C26H27N3O5S	C21H27N5O7S	7.5061	7.5061	7.4152
Negative	494.237	8.7	152.94789:1708 170.95197:85 253.00867:120 351.27002:78 389.08463:197 407.10989:16684 456.02646:52 458.23422:157	[M-H]-			yes	0.0041849	-10.124	0.0075002	-9.3174	Alkaloide	Harmala alkaloids	Macrolactams	Macrolactams	(1R)-N-(3,5-dimethyl-4-isoxazolyl)-1-(hydroxymethyl)-7-methoxy-2-(1-oxopropyl)-1'-spiro[3,9-dihydro-1H-pyrido[3,4-b]indole-4,4'-piperidine]carboxamide	N-[(5S,6R,9S)-5-methoxy-3,6,9-trimethyl-2-oxo-8-[oxo(2-pyrazinyl)methyl]-11-oxa-3,8-diazabicyclo[10.4.0]hexadeca-1(12),13,15-trien-14-yl]cyclopropanecarboxamide	N-[(4S,7R,8R)-5-[cyclopropyl(oxo)methyl]-8-methoxy-4,7,10-trimethyl-11-oxo-2-oxa-5,10-diazabicyclo[10.4.0]hexadeca-1(12),13,15-trien-14-yl]-2-pyrazinecarboxamide	ChEBI=CHEBI:127609;CHEBI:128222	ChEBI=CHEBI:115188;CHEBI:115193;CHEBI:115214;CHEBI:115409;CHEBI:115412;CHEBI:115414	ChEBI=CHEBI:111871;CHEBI:111892;CHEBI:111912;CHEBI:111976;CHEBI:112008;CHEBI:112100;CHEBI:112128	C26H33N5O5	C26H33N5O5	C26H33N5O5	7.4452	7.4088	7.4088
Negative	494.253	7.75	153.25752:650 171.10152:72 253.40662:56 297.26978:408 389.01657:192 405.27621:50 407.13474:7143 433.11963:62	[M-H]-			yes	0.0021327	-8.0002	0.0048205	-7.2404	Phospholipid	1-acyl-glycerol-3-phosphoserines	Phenylazetidines		PS(16:1(9Z)/0:0)	(8R,9R,10R)-10-(hydroxymethyl)-N-(2-methoxyphenyl)-9-[4-(2-phenylethynyl)phenyl]-1,6-diazabicyclo[6.2.0]decane-6-carboxamide		LipidMAPS=LMGP03050010	ChEBI=CHEBI:129084		C22H42NO9P	C31H33N3O3		7.5835	6.613
Positive	494.308	8.79	184.06525:10967 258.00439:147 311.17502:139 312.77209:57 386.53671:97 417.18939:201 476.21463:34452 476.85675:128	[M+H]+			yes	0.0021158	-11.454	0.001013	-10.773	Alkaloide	Cerveratrum-type alkaloids	Phenylacetamides	Proline and derivatives	Zygadenine	N-[(2R,3S)-2-[[cyclopropylmethyl(methyl)amino]methyl]-5-[(2S)-1-hydroxypropan-2-yl]-3-methyl-6-oxo-2,3,4,7-tetrahydro-1,5-benzoxazonin-9-yl]-2-phenylacetamide	LSM-8454	KNApSAcK=C00002272,ChEBI=CHEBI:10130,UNPD=UNPD144180;UNPD145171;UNPD93329	ChEBI=CHEBI:123656;CHEBI:123699;CHEBI:123905;CHEBI:123993	ChEBI=CHEBI:97075;CHEBI:97349;CHEBI:97715;CHEBI:97980;CHEBI:99145;CHEBI:99308;CHEBI:99465;CHEBI:100597;CHEBI:101357;CHEBI:101440;CHEBI:101752;CHEBI:102356;CHEBI:102813	C27H43NO7	C29H39N3O4	C29H39N3O4	7.2892	7.0869	7.0702
Positive	494.308	8.61	184.03998:16488 476.20343:10653	[M+H]+			yes	0.00055454	-9.8903	0.00023257	-9.5194	Alkaloide	Cerveratrum-type alkaloids	Phenylacetamides	Proline and derivatives	Zygadenine	N-[(2R,3S)-2-[[cyclopropylmethyl(methyl)amino]methyl]-5-[(2S)-1-hydroxypropan-2-yl]-3-methyl-6-oxo-2,3,4,7-tetrahydro-1,5-benzoxazonin-9-yl]-2-phenylacetamide	LSM-8454	KNApSAcK=C00002272,ChEBI=CHEBI:10130,UNPD=UNPD144180;UNPD145171;UNPD93329	ChEBI=CHEBI:123656;CHEBI:123699;CHEBI:123905;CHEBI:123993	ChEBI=CHEBI:97075;CHEBI:97349;CHEBI:97715;CHEBI:97980;CHEBI:99145;CHEBI:99308;CHEBI:99465;CHEBI:100597;CHEBI:101357;CHEBI:101440;CHEBI:101752;CHEBI:102356;CHEBI:102813	C27H43NO7	C29H39N3O4	C29H39N3O4	7.4669	7.246	7.2293
Positive	494.323	7.75	184.16193:7719 184.94177:126 417.07559:116 439.077:95 476.07565:16209 476.8157:185	[M+H]+			yes	8.7472e-05	-11.411	0.0039816	-11.36	Phospholipid	1-acyl-sn-glycero-3-phosphocholines	2-acyl-sn-glycero-3-phosphocholines	1-acyl-sn-glycero-3-phosphoethanolamines	LysoPC(16:1(9Z))	2-[(9Z)-hexadecenoyl]-sn-glycero-3-phosphocholine	PE(19:1(9Z)/0:0)	HMDB=HMDB0010383,ChEBI=CHEBI:73851;CHEBI:84752,YMDB=YMDB01184;YMDB02210,FooDB=FDB027534,BMDB=BMDB10383,LipidMAPS=LMGP01050021;LMGP01050022,Urine=HMDB0010383,Serum=HMDB0010383,UNPD=UNPD157409	ChEBI=CHEBI:133515	LipidMAPS=LMGP02050019	C24H48NO7P	C24H48NO7P	C24H48NO7P	7.0406	6.2084	6.1947
Negative	498.247	8.55	196.04477:241 203.1503:184 214.00114:207 257.17841:1692 283.23828:56 301.10059:4146 479.16098:68	[M-H]-			yes	0.0040554	-9.8444	0.0099193	-8.877	Other	Isoquinolones and derivatives	Phenylmethylamines	4-benzylpiperidines	2-[2-[4-[2-hydroxy-3-(2-prop-2-enylphenoxy)propyl]-1-piperazinyl]ethyl]benzo[de]isoquinoline-1,3-dione	(2S)-2-[(4R,5R)-8-[3-(dimethylamino)prop-1-ynyl]-4-methyl-5-[[methyl-(phenylmethyl)amino]methyl]-1,1-dioxo-4,5-dihydro-3H-6,1$l^{6},2-benzoxathiazocin-2-yl]-1-propanol	2-[(3S,6aR,8S,10aR)-3-hydroxy-1-(1,3-thiazol-2-ylmethyl)-3,4,6,6a,8,9,10,10a-octahydro-2H-pyrano[2,3-c][1,5]oxazocin-8-yl]-1-(4-benzylpiperidin-1-yl)ethanone	ChEBI=CHEBI:104068	ChEBI=CHEBI:126092;CHEBI:126103;CHEBI:126128;CHEBI:126210;CHEBI:127756;CHEBI:129315;CHEBI:129599;CHEBI:129832	ChEBI=CHEBI:97412;CHEBI:98219;CHEBI:99510;CHEBI:100579;CHEBI:102552;CHEBI:102589;CHEBI:102721;CHEBI:103140	C30H33N3O4	C27H37N3O4S	C27H37N3O4S	7.2801	7.1916	7.1271
Negative	499.107	19.29	341.09491:988 400.70459:773 436.07187:72 438.06064:2674 438.78018:13614 439.46738:58	[M-H]-			yes	0.0041254	-9.3234	0.00019342	-9.7093	No annotation
Negative	500.262	9.08	195.90347:425 205.19107:491 214.0428:648 259.18631:3041 285.05859:105 303.24619:21858 328.68335:72 394.7634:54 439.14963:68 479.89102:67	[M-H]-			yes	0.01283	-10.853	0.0074484	-9.6883	Other	Macrolactams	Long-chain fatty acids	N-phenylureas	N-[(5S,6S,9S)-5-methoxy-3,6,9-trimethyl-2-oxo-11-oxa-3,8-diazabicyclo[10.4.0]hexadeca-1(12),13,15-trien-14-yl]-4-phenylbenzamide	icas#21	LSM-30622	ChEBI=CHEBI:98802;CHEBI:99339;CHEBI:100038;CHEBI:101297	ChEBI=CHEBI:79107	ChEBI=CHEBI:119173;CHEBI:119241;CHEBI:119289;CHEBI:119340;CHEBI:119350;CHEBI:119374;CHEBI:119395	C30H35N3O4	C28H39NO7	C30H35N3O4	7.6626	7.577	7.5375
Negative	503.162	19.86	179.08774:137 323.06549:2041 340.64209:197 341.25711:154 383.0202:68	[M-H]-			yes	0.016124	-8.8396	0.0039452	-9.1976	Carbohydrate	Oligosaccharides	O-glycosyl compounds	Oligosaccharides	beta-D-Fructofuranosyl alpha-D-glucopyranosyl-(1->4)-D-glucopyranoside	Umbelliferose	6-Kestose	HMDB=HMDB0029930,ChEBI=CHEBI:55512,FooDB=FDB001194;FDB020842,UNPD=UNPD174769;UNPD23751;UNPD45918	HMDB=HMDB0033748,KNApSAcK=C00001153,ChEBI=CHEBI:9859,FooDB=FDB011880,UNPD=UNPD432	HMDB=HMDB0033673,ChEBI=CHEBI:64833,FooDB=FDB011776;FDB020000,PubChem=9914062,PlantCyc=6-KESTOSE,UNPD=UNPD51151	C18H32O16	C18H32O16	C18H32O16	7.8968	7.8968	7.8968
Negative	509.288	5.41	153.14758:296 227.10121:238 244.99477:97 281.18274:10942 282.30341:227 417.21826:63 434.52594:57 479.237:60	[M-H]-			yes	0.002919	-8.0778	0.02512	-7.2075	Phospholipid	Lysophosphatidylglycerols	Lysophosphatidylglycerols	Bicyclic monoterpenoids	1-(9Z-octadecenoyl)-sn-glycero-3-phospho-(1'-sn-glycerol)(1-)	(S,S)-2-oleoyl-sn-glycero-1-phospho-(1'-sn-glycerol)(1-)	longirostrerone B	ChEBI=CHEBI:72828;CHEBI:72952;CHEBI:84514;CHEBI:85410;CHEBI:139152,LipidMAPS=LMGP04050006	ChEBI=CHEBI:139157;CHEBI:139230	ChEBI=CHEBI:68981,UNPD=UNPD205164;UNPD218400	C24H47O9P	C24H47O9P	C31H42O6	8.4304	8.0159	7.7119
Positive	520.323	9.12	183.92229:3616 194.13936:101 258.04486:69 502.16406:10214 503.13275:81	[M+H]+			yes	0.0047665	-9.1526	0.0053004	-8.136	No annotation
Negative	520.91	16.41	152.98576:151 155.07043:415 204.93066:431 249.07001:7030 352.74658:53 370.82446:237 384.89404:8474 426.97699:1391	[M-H]-			yes	0.0061083	13.178	0.067253	13.392	No annotation
Positive	522.201	14.01	162.79169:57 223.26828:55 258.86108:85 288.5976:214 289.21344:215 306.78406:211 324.87415:5130 340.69983:99 342.6814:2543 360.20679:54 419.94629:322 420.75323:208 432.98401:76 437.56201:126 438.64221:799 450.53217:381 467.6767:57 485.23737:192 486.20563:550 486.82159:3917 502.9455:218 503.84833:943 504.71448:9076	[M+H]+			yes	0.0013039	12.672	0.00013929	12.882	Terpenoid	Terpene glycosides	Terpene glycosides		Lonijaposide E	Lonijaposide M		ChEBI=CHEBI:69643,UNPD=UNPD220452	ChEBI=CHEBI:69651,UNPD=UNPD226804		C25H31NO11	C25H31NO11		4.7564	4.7447
Positive	522.203	0.7	180.05203:88 258.82233:59 270.85248:73 288.41916:127 289.06122:174 306.80615:63 324.40619:429 325.09955:1302 342.82867:821 450.87659:87 486.29706:341 486.93445:381 504.04352:326 504.79974:742	[M+H]+		yes	yes	0.062752	11.731	0.0022606	13.044	Terpenoid	Terpene glycosides	Terpene glycosides		Lonijaposide E	Lonijaposide M		ChEBI=CHEBI:69643,UNPD=UNPD220452	ChEBI=CHEBI:69651,UNPD=UNPD226804		C25H31NO11	C25H31NO11		6.3338	6.3238
Negative	522.267	9.9	152.99638:752 170.90048:74 281.31506:219 351.05493:89 417.14459:234 435.21082:14926	[M-H]-			yes	0.031096	-2.5172	0.0021486	-9.5169	Other	N-acyl amines	Macrolactams	Benzodioxoles	FR901465	2-[[(4R,7R,8S)-14-[[cyclopropyl(oxo)methyl]amino]-8-methoxy-4,7,10-trimethyl-11-oxo-2-oxa-5,10-diazabicyclo[10.4.0]hexadeca-1(12),13,15-trien-5-yl]methyl]benzoic acid	N-[(2R,3S)-2-[[1,3-benzodioxol-5-ylmethyl(methyl)amino]methyl]-5-[(2S)-1-hydroxypropan-2-yl]-3-methyl-6-oxo-2,3,4,7-tetrahydro-1,5-benzoxazonin-9-yl]cyclopropanecarboxamide	ChEBI=CHEBI:65916,LipidMAPS=LMFA08020178,UNPD=UNPD174819	ChEBI=CHEBI:122581	ChEBI=CHEBI:108629;CHEBI:108657;CHEBI:108686;CHEBI:108809;CHEBI:111784;CHEBI:113681	C27H41NO9	C29H37N3O6	C29H37N3O6	7.8472	7.3242	7.3215
Negative	522.284	7.7	153.15677:1686 171.16003:127 281.28262:180 417.06244:447 435.12817:24847 504.79346:76	[M-H]-			yes	0.0042519	-9.1543	0.0077121	-8.5181	Phospholipid	1-acyl-glycerol-3-phosphoserines	2-acyl-glycerol-3-phosphoserines		1-Oleoylglycerophosphoserine	2-oleoyl-sn-glycero-3-phosphoserine(1-)		HMDB=HMDB0061694,ChEBI=CHEBI:52649;CHEBI:74617,YMDB=YMDB01258,LipidMAPS=LMGP03050001	ChEBI=CHEBI:77342;CHEBI:77646		C24H46NO9P	C24H46NO9P		8.4346	7.6024
Positive	522.339	9.62	183.918:12655 258.19839:59 504.19757:10373	[M+H]+			yes	0.0034387	-9.6487	0.002574	-9.3738	Glycoside	Aminoglycosides	Phenylacetamides		Demycinosylmycinamicin IV; Mycinamicin VII; Mycinomycin VII	N-[(2R,3S)-2-[[cyclohexylmethyl(methyl)amino]methyl]-5-[(2R)-1-hydroxypropan-2-yl]-3-methyl-6-oxo-3,4-dihydro-2H-1,5-benzoxazocin-8-yl]-2-phenylacetamide		KNApSAcK=C00018488,ChEBI=CHEBI:80019,PubChem=90657480;13121618,UNPD=UNPD75256	ChEBI=CHEBI:111610;CHEBI:113742;CHEBI:113753;CHEBI:113814;CHEBI:123806;CHEBI:124182;CHEBI:124354;CHEBI:124843		C29H47NO7	C31H43N3O4		7.1377	6.6862
Positive	522.354	7.74	184.15793:14333 184.91531:53 258.13696:91 337.01904:73 339.29114:129 445.27979:154 504.12561:30371 504.86444:161	[M+H]+			yes	0.00070983	-11.663	0.0066653	-10.343	Phospholipid	1-acyl-sn-glycero-3-phosphocholines	1-acyl-sn-glycero-3-phosphocholines	1-acyl-sn-glycero-3-phosphocholines	LysoPC(18:1(11Z))	LysoPC(18:1(9Z))	PC(18:1(6Z)/0:0)	HMDB=HMDB0010385,ChEBI=CHEBI:86255,YMDB=YMDB02211,FooDB=FDB027536,BMDB=BMDB10385,LipidMAPS=LMGP01050138,Serum=HMDB0010385	HMDB=HMDB0002815,ChEBI=CHEBI:28610;CHEBI:72589,YMDB=YMDB01190;YMDB01810,FooDB=FDB005287;FDB023066,BMDB=BMDB02815,LipidMAPS=LMGP01050030;LMGP01050032;LMGP01050114,Feces=HMDB0002815,Serum=HMDB0002815,UNPD=UNPD65944	LipidMAPS=LMGP01050029	C26H52NO7P	C26H52NO7P	C26H52NO7P	7.1924	7.1924	6.3591
Positive	524.181	0.92	165.05801:675 182.00272:5480 325.15308:69 342.87195:59 343.98566:116 352.99335:136 361.64056:279 432.4892:52 434.2168:92 443.07971:55 506.06134:82	[M+H]+			yes	0.0061909	-6.6013	0.0021927	-10.789	Other	2-naphthalene sulfonic acids and derivatives			2-[[(3,5-dimethylphenyl)-oxomethyl]amino]acetic acid [2-[4-(2-naphthalenylsulfonyl)-1-piperazinyl]-2-oxoethyl] ester			ChEBI=CHEBI:123296			C27H29N3O6S			5.3025
Positive	527.157	13.77	185.04256:323 203.05592:414 347.19403:3520 365.05505:38392 365.67749:55	[M+H]+			yes	0.0053805	11.222	0.053977	8.7952	Flavonoid-like	Pyranoisoflavonoids	Flavonoid O-glycosides	3'-O-methylated flavonoids	6-(2-{8,8-dimethyl-2-oxo-2H,8H-pyrano[2,3-f]chromen-3-yl}-5-methoxyphenoxy)-3,4,5-trihydroxyoxane-2-carboxylic acid	Viscutin 1	Salcolin A	HMDB=HMDB0135723	KNApSAcK=C00008766,LipidMAPS=LMPK12020265,UNPD=UNPD128349	KNApSAcK=C00042924;C00042925,ChEBI=CHEBI:67642;CHEBI:67643,UNPD=UNPD74882;UNPD85943	C27H26O11	C27H26O11	C27H26O11	7.9379	7.8981	7.7096
Negative	536.884	16.28	152.96249:203 155.07042:674 204.94862:574 248.88507:14485 264.92111:158 384.86383:28473 400.78961:718 442.72675:570	[M-H]-			yes	0.00011033	10.792	0.029913	11.617	No annotation
Negative	537.167	19.49	177.18954:64 195.10724:7615 195.90326:117	[M-H]-			yes	0.036189	-9.4005	0.00056556	-10.735	Glycoside	Iridoid O-glycosides	Coumaric acids and derivatives	Coumaric acids and derivatives	Lippioside I	Minecoside	6-O-feruloylcatalpol	HMDB=HMDB0034265,FooDB=FDB012592,UNPD=UNPD13211	KNApSAcK=C00010522,ChEBI=CHEBI:69801,UNPD=UNPD174144;UNPD86815;UNPD215740	ChEBI=CHEBI:69800,UNPD=UNPD20014;UNPD42137;UNPD213846	C25H30O13	C25H30O13	C25H30O13	7.8713	7.834	7.834
Negative	538.298	8.61	253.21024:1192 336.80164:59 468.08575:51 478.21045:30687 479.18286:96	[M-H]-			yes	0.0040886	-11.703	0.0017538	-11.426	Other	Macrolactams	Beta amino acids and derivatives		N-[(3S,9R,10R)-9-[[cyclopropylmethyl(methyl)amino]methyl]-12-[(2S)-1-hydroxypropan-2-yl]-3,10-dimethyl-13-oxo-2,8-dioxa-12-azabicyclo[12.4.0]octadeca-1(14),15,17-trien-16-yl]methanesulfonamide	N-[(2S,3R)-5-[(2S)-1-hydroxypropan-2-yl]-3-methyl-2-[[methyl(pyridin-4-ylmethyl)amino]methyl]-6-oxo-3,4-dihydro-2H-1,5-benzoxazocin-8-yl]-3-(4-morpholinyl)propanamide		ChEBI=CHEBI:126007;CHEBI:126394;CHEBI:126494;CHEBI:127695;CHEBI:129396;CHEBI:129708;CHEBI:130589;CHEBI:131012	ChEBI=CHEBI:127266;CHEBI:127904;CHEBI:128695;CHEBI:128943;CHEBI:129143;CHEBI:129499;CHEBI:131003;CHEBI:131119		C27H45N3O6S	C29H41N5O5		7.6057	7.4993
Positive	538.518	5.24	282.29437:55 283.09521:107 297.83664:83 300.43686:112 501.58942:62 504.91779:221 520.07135:4049 521.01184:173	[M+H]+			yes	0.0026985	-8.9072	1.643e-05	-10.282	Ceramide	Ceramides	Secondary alcohols	Long-chain ceramides	N-Palmitoylsphingosine	N-heptadecanoyl-14-methylhexadecasphingosine	N-heptadecanoyl-15-methylhexadecasphing-4-enine	HMDB=HMDB0000790;HMDB0004949,KNApSAcK=C00031461,ChEBI=CHEBI:72959,FooDB=FDB022245;FDB023536,BMDB=BMDB00790;BMDB04949,LipidMAPS=LMSP02010004,Feces=HMDB0004949,Serum=HMDB0000790;HMDB0004949,PubChem=5283564;2733582,UNPD=UNPD63056;UNPD216035	ChEBI=CHEBI:131539	ChEBI=CHEBI:71367	C34H67NO3	C34H67NO3	C34H67NO3	5.769	4.9357	4.9357
Negative	539.139	19.91	179.15897:70 195.26944:90 196.15268:72 197.22519:77 323.04468:655 340.55414:114 359.2572:155 376.96033:71 412.00726:50 502.9682:15142 504.27557:53	[M-H]-			yes	0.013467	-9.1829	0.0049999	-6.4903	Peptide	Dipeptides			N,N'-Bis(g-glutamyl)-3,3'-(1,2-propylenedithio)dialanine			HMDB=HMDB0038667,FooDB=FDB018066			C19H32N4O10S2			6.0517
Negative	540.313	9.58	255.24066:559 391.13361:55 480.20441:65113 481.30579:184	[M-H]-			yes	0.0060255	-3.6294	0.0037935	-11.269	Phospholipid	1-acyl-sn-glycero-3-phosphocholines	Aminoglycosides	Alkyl aryl ethers	LysoPC(20:5(5Z,8Z,11Z,14Z,17Z))	novapikromycin(1+)	1-[(2R,3R)-2-[[cyclohexylmethyl(methyl)amino]methyl]-5-[(2S)-1-hydroxypropan-2-yl]-3-methyl-6-oxo-3,4-dihydro-2H-1,5-benzoxazocin-8-yl]-3-(3,5-dimethyl-4-isoxazolyl)urea	HMDB=HMDB0010397,ChEBI=CHEBI:88686,FooDB=FDB027548,BMDB=BMDB10397,LipidMAPS=LMGP01050050,Serum=HMDB0010397,UNPD=UNPD182615	ChEBI=CHEBI:77351;CHEBI:77648,PubChem=86289216,UNPD=UNPD50385	ChEBI=CHEBI:113575;CHEBI:113606;CHEBI:113756;CHEBI:113837;CHEBI:123727;CHEBI:124216	C28H48NO7P	C28H47NO9	C29H43N5O5	8.6665	7.8776	7.5523
Positive	544.323	9.11	184.03712:3236 258.00854:96 484.34381:235 526.25153:9002	[M+H]+			yes	0.0077949	-8.6718	0.011708	-7.5072	Other	Benzoxazines	N-acyl-alpha amino acids and derivatives	Macrolactams	LSM-11779	(2S)-2-[[[5-[[methyl-(phenylmethyl)amino]-oxomethyl]-1H-imidazol-4-yl]-oxomethyl]amino]-6-[[(2-methylpropan-2-yl)oxy-oxomethyl]amino]hexanoic acid tert-butyl ester	N-[(4R,7R,8S)-8-methoxy-4,7,10-trimethyl-11-oxo-5-(2-phenylethyl)-2-oxa-5,10-diazabicyclo[10.4.0]hexadeca-1(12),13,15-trien-14-yl]-2-phenylacetamide	ChEBI=CHEBI:100404;CHEBI:122210;CHEBI:122213	ChEBI=CHEBI:116491	ChEBI=CHEBI:115812	C33H41N3O4	C28H41N5O6	C33H41N3O4	6.3526	6.2554	6.2216
Negative	546.263	9.79	281.19086:358 478.2041:20630	[M-H]-			yes	0.00025741	-9.9901	0.0015115	-9.5125	Other	Lysergamides	Macrolactams		Ergosine	N-[(3R,9S,10R)-12-[(2S)-1-hydroxypropan-2-yl]-3,10-dimethyl-9-(methylaminomethyl)-13-oxo-2,8-dioxa-12-azabicyclo[12.4.0]octadeca-1(14),15,17-trien-16-yl]benzenesulfonamide		KNApSAcK=C00001723;C00011224,ChEBI=CHEBI:4823,UNPD=UNPD78461;UNPD94314	ChEBI=CHEBI:104592;CHEBI:104667;CHEBI:106802;CHEBI:106872;CHEBI:110930;CHEBI:110984;CHEBI:117715;CHEBI:117883;CHEBI:123759;CHEBI:123794;CHEBI:123970;CHEBI:123977;CHEBI:124091		C30H37N5O5	C28H41N3O6S		7.567	7.3618
Positive	548.54	11.78	208.25212:586 209.24181:73 220.27441:58 226.31802:500 236.37663:338 237.25853:223 238.32455:139 254.27756:182 311.39825:116 312.44971:147 336.53571:719 340.35101:356 364.40833:2268 518.35321:60 530.56427:15477	[M+H]+			yes	9.0444e-05	10.045	0.00010407	11.953	No annotation
Negative	552.331	12	253.40295:271 276.96881:65 478.05096:13945 478.77222:90 492.33112:55	[M-H]-			yes	0.00082421	-9.1767	0.018642	-8.33	Phospholipid	1-acyl-glycerol-3-phosphoserines			PS(20:0/0:0)			LipidMAPS=LMGP03050012			C26H52NO9P			6.1279
Negative	552.858	16.21	152.99712:58 205.01044:173 249.01604:2819 264.83408:408 400.7995:2198 458.77246:109	[M-H]-			yes	3.3615e-06	9.9043	0.00023038	9.4799	No annotation
Negative	564.312	9.13	279.13409:257 504.22516:17424 505.06647:112	[M-H]-			yes	0.0014288	-11.016	0.08019	-1.9005	Other	Benzoic acids	Macrolactams		4-[[[(2S,3R)-9-[[cyclohexyl(oxo)methyl]amino]-5-[(2R)-1-hydroxypropan-2-yl]-3-methyl-6-oxo-2,3,4,7-tetrahydro-1,5-benzoxazonin-2-yl]methyl-methylamino]methyl]benzoic acid	N-[(5S,6R,9R)-8-[cyclohexyl(oxo)methyl]-5-methoxy-3,6,9-trimethyl-2-oxo-11-oxa-3,8-diazabicyclo[10.4.0]hexadeca-1(12),13,15-trien-14-yl]-3-methoxybenzamide		ChEBI=CHEBI:124900	ChEBI=CHEBI:102375		C32H43N3O6	C32H43N3O6		7.6065	7.4864
Negative	566.328	9.81	281.21564:541 506.16461:37959 506.99976:175 507.60736:60	[M-H]-			yes	0.0019189	-13.005	0.0026966	-12.251	Phospholipid	1-acyl-sn-glycero-3-phosphocholines	2-acyl-sn-glycero-3-phosphocholines		LysoPC(22:6(4Z,7Z,10Z,13Z,16Z,19Z))	2-(4Z,7Z,10Z,13Z,16Z,19Z)-docosahexaenoyl-sn-glycero-3-phosphocholine		HMDB=HMDB0010404,ChEBI=CHEBI:73873,FooDB=FDB027555,BMDB=BMDB10404,LipidMAPS=LMGP01050056,Serum=HMDB0010404,UNPD=UNPD184170	ChEBI=CHEBI:76085		C30H50NO7P	C30H50NO7P		7.5001	6.6668
Positive	566.549	5.21	283.51257:68 310.46606:65 416.83289:111 530.00348:64 548.26886:2047	[M+H]+			yes	0.013545	-9.6149	0.00022629	-9.9734	Ceramide	Long-chain ceramides	Ceramides	Long-chain ceramides	Cer(d18:0/18:1(9Z))	N-Stearoylsphingosine	Cer(d18:0/18:1(11Z))	HMDB=HMDB0011763,ChEBI=CHEBI:74100,FooDB=FDB028433,BMDB=BMDB11763,LipidMAPS=LMSP02020015,Serum=HMDB0011763	HMDB=HMDB0000829;HMDB0004950,ChEBI=CHEBI:72961,SMPDB=PW_C002313,FooDB=FDB022270;FDB023537,BMDB=BMDB00829;BMDB04950,LipidMAPS=LMSP02010006,Feces=HMDB0004950,Serum=HMDB0004950,PubChem=5283565,UNPD=UNPD131046	HMDB=HMDB0011762,ChEBI=CHEBI:88431,FooDB=FDB028432,BMDB=BMDB11762,Serum=HMDB0011762	C36H71NO3	C36H71NO3	C36H71NO3	6.229	6.229	5.8123
Negative	569.255	8.63	222.871:114 240.9895:2165 253.22505:4896 314.99155:1265 333.17407:68 389.17554:1032 404.84009:101 424.92535:89 428.96686:66 445.09741:66 450.97821:103 488.96942:72 504.87726:61 509.01556:94 548.90894:152 551.1311:69	[M-H]-			yes	0.0036562	-10.966	0.005462	-10.312	Other	Pyranoxanthones			Artoindonesianin A;13-[(2E)-3,7-Dimethyl-2,6-octadienyl]-5a,6-dihydro-1,3,8-trihydroxy-5,5,11,11-tetramethyl-5H,7H,11H-benzofuro[3,4-bc]pyrano[2,3-i]xanthen-7-one			KNApSAcK=C00013487,LipidMAPS=LMPK12111516,UNPD=UNPD137142			C35H38O7			7.6442
Negative	569.274	7.72	223.0937:212 241.11417:1551 253.25311:3240 254.30266:148 315.08014:2010 316.03607:54 356.2489:52 389.0675:943 494.31305:120 495.38483:209 509.15106:50 551.16626:70	[M-H]-			yes	0.00016905	-6.7318	0.0036628	-7.961	Phospholipid	2-acyl-sn-glycerol-3-phosphoinositols	1-acyl-sn-glycerol-3-phosphoinositols	Limonoids	2-palmitoleoyl-sn-glycero-3-phospho-D-myo-inositol	PI(16:1(9Z)/0:0)	xylocarpin J	ChEBI=CHEBI:138108	YMDB=YMDB01237,LipidMAPS=LMGP06050009	ChEBI=CHEBI:66337	C25H47O12P	C25H47O12P	C32H42O9	7.2523	7.2494	7.2411
Positive	575.503	11.44	177.15829:102 219.23349:266 237.34442:886 245.24667:64 247.31081:253 263.19766:104 265.33298:1219 293.25006:113 311.38037:229 313.42419:81 319.36188:83 321.35693:125 339.31592:214 483.68268:84 501.51581:278 512.83759:157	[M+H]+			yes	0.0001992	11.738	0.0014368	12.499	Other	Annonaceous acetogenins	Lineolic acids and derivatives		Montecristin	Mayolene-19		HMDB=HMDB0029795,KNApSAcK=C00044239,FooDB=FDB001003,UNPD=UNPD39588	LipidMAPS=LMFA07010690		C37H66O4	C37H66O4		7.4042	7.3766
Positive	576.193	12.2	234.06003:7653	[M+H]+			yes	0.0041254	10.921	0.010105	10.385	No annotation
Negative	580.362	7.75	281.35071:609 305.0296:55 433.20526:517 459.33929:54 466.30182:70 479.18787:54 480.0647:316 504.72839:332 506.15826:67293 506.84003:86 518.10022:76 521.05621:407	[M-H]-			yes	0.00055454	-10.655	0.005535	-10.143	Phospholipid	1-acyl-glycerol-3-phosphoserines			PS(22:0/0:0)			LipidMAPS=LMGP03050025			C28H56NO9P			7.3287
Negative	588.312	9.12	303.25861:228 528.16235:14700 528.97797:81	[M-H]-			yes	0.002872	-10.328	0.011236	-9.3339	Other	Macrolactams	Macrolactams		N-[[(3R,9S,10R)-16-(dimethylamino)-12-[(2R)-1-hydroxypropan-2-yl]-3,10-dimethyl-13-oxo-2,8-dioxa-12-azabicyclo[12.4.0]octadeca-1(14),15,17-trien-9-yl]methyl]-N,4-dimethylbenzenesulfonamide	N-[(3R,9S,10R)-12-[(2S)-1-hydroxypropan-2-yl]-3,10-dimethyl-9-[[methyl(propyl)amino]methyl]-13-oxo-2,8-dioxa-12-azabicyclo[12.4.0]octadeca-1(14),15,17-trien-16-yl]benzenesulfonamide		ChEBI=CHEBI:104645;CHEBI:104727;CHEBI:104836;CHEBI:106770;CHEBI:106824;CHEBI:106974;CHEBI:110877;CHEBI:110967;CHEBI:111028;CHEBI:111136;CHEBI:117833;CHEBI:123802;CHEBI:123827;CHEBI:124067;CHEBI:124092	ChEBI=CHEBI:104652;CHEBI:104687;CHEBI:106838;CHEBI:106861;CHEBI:107019;CHEBI:123989;CHEBI:124020		C31H47N3O6S	C31H47N3O6S		7.5835	7.5835
Positive	594.22	14.06	252.09148:178 258.77026:141 271.0029:72 288.92035:399 306.97116:76 324.92548:1971 342.97064:184 414.12115:218 432.09802:497 486.30408:78 486.93018:71 504.81195:87 576.30902:78	[M+H]+			yes	0.0016689	9.4143	0.00043858	10.128	Other	P-toluenesulfonamides			2-[(2R,4aS,12aS)-5-methyl-8-[(4-methylphenyl)sulfonylamino]-6-oxo-2,3,4,4a,12,12a-hexahydropyrano[2,3-c][1,5]benzoxazocin-2-yl]-N-[(2-methoxyphenyl)methyl]acetamide			ChEBI=CHEBI:98079;CHEBI:99266;CHEBI:100526;CHEBI:101144;CHEBI:101428;CHEBI:102518			C31H35N3O7S			7.1693
Negative	595.27	9.04	222.96072:284 240.98351:2444 279.10156:7416 314.90692:2051 333.08215:108 411.00854:63 415.17053:1457 433.04199:85 514.75275:51 534.73663:72 574.87201:281 576.14062:54	[M-H]-			yes	0.0039599	-10.172	0.0054026	-9.2283	No annotation
Negative	596.526	5.25	534.01257:55 536.25787:13743	[M-H]-			yes	0.00045601	-8.6493	1.6302e-05	-9.0729	No annotation
Negative	597.285	10.06	222.90887:324 241.03171:2872 281.16602:10930 314.96881:2939 332.97186:92 417.11407:2166 435.0434:88 577.17664:86	[M-H]-			yes	0.0072782	-10.791	0.014404	-3.3312	Terpenoid	Triterpenoids	Naphthalenes		Forskoditerpenoside D;(-)-Forskoditerpenoside D	N-[(2S,3R)-5-[(2R)-1-hydroxypropan-2-yl]-3-methyl-2-[[methyl-[(1-naphthalenylamino)-oxomethyl]amino]methyl]-6-oxo-3,4-dihydro-2H-1,5-benzoxazocin-10-yl]-2,5-dimethyl-3-pyrazolecarboxamide		KNApSAcK=C00030315,ChEBI=CHEBI:65908,UNPD=UNPD126923	ChEBI=CHEBI:123670;CHEBI:123979;CHEBI:124668;CHEBI:124708		C30H46O12	C33H38N6O5		7.5482	7.3785
Negative	597.305	7.68	223.31775:292 241.03825:2570 241.84068:129 279.41833:52 281.25061:8137 282.26593:351 315.00031:2259 316.10773:73 332.776:79 417.09888:1576 435.2356:55 560.51917:55	[M-H]-			yes	0.0038602	-8.9216	0.0050741	-8.5588	Phospholipid	1-acyl-sn-glycerol-3-phosphoinositols	Limonoids	Indolecarboxylic acids and derivatives	1-Oleoylglycerophosphoinositol	2',3'-dihydrosalannin	LSM-8427	HMDB=HMDB0061693,ChEBI=CHEBI:78762;CHEBI:82753,YMDB=YMDB01243,LipidMAPS=LMGP06050005	ChEBI=CHEBI:67310,UNPD=UNPD200676	ChEBI=CHEBI:97048;CHEBI:98592;CHEBI:99306;CHEBI:100895;CHEBI:103340;CHEBI:120070;CHEBI:120072	C27H51O12P	C34H46O9	C35H42N4O5	8.6608	7.4644	7.2861
Negative	611.125	1.16	176.98666:51 178.99037:165 209.95833:100 254.06602:776 268.02814:82 272.01663:2365 285.8418:95 288.00427:462 303.99347:631 305.9335:5683 337.96899:2050 482.09027:1906 574.94672:91 593.04913:828	[M-H]-			yes	0.0022879	-10.768	0.00056806	-11.132	Flavonoid-like	Flavonoid O-glucuronides	Flavonoid O-glucuronides	Flavonoid O-glucuronides	6-[5-(3-{[3,4-dihydroxy-5-(hydroxymethyl)oxolan-2-yl]oxy}-5,7-dihydroxy-4-oxo-3,4-dihydro-2H-1-benzopyran-2-yl)-2-hydroxyphenoxy]-3,4,5-trihydroxyoxane-2-carboxylic acid	6-[4-(3-{[3,4-dihydroxy-5-(hydroxymethyl)oxolan-2-yl]oxy}-5,7-dihydroxy-4-oxo-3,4-dihydro-2H-1-benzopyran-2-yl)-2-hydroxyphenoxy]-3,4,5-trihydroxyoxane-2-carboxylic acid	6-[(3-{[3,4-dihydroxy-5-(hydroxymethyl)oxolan-2-yl]oxy}-2-(3,4-dihydroxyphenyl)-7-hydroxy-4-oxo-3,4-dihydro-2H-1-benzopyran-5-yl)oxy]-3,4,5-trihydroxyoxane-2-carboxylic acid	HMDB=HMDB0132734	HMDB=HMDB0132733	HMDB=HMDB0132735	C26H28O17	C26H28O17	C26H28O17	7.2512	7.2512	7.2447
Negative	612.296	8.52	195.93364:98 214.01016:75 237.76741:51 253.23138:3899 268.03845:151 389.18298:62 407.14465:51 448.15857:57 450.27771:15055 492.26575:1615 522.22028:685 576.16461:57 594.09583:179	[M-H]-		yes	yes	0.09397	-1.9799	0.0067227	-8.2935	Other	Diphenylethers			N-[(2S,3S)-5-[(2S)-1-hydroxypropan-2-yl]-3-methyl-2-[[methyl-[(4-phenoxyphenyl)methyl]amino]methyl]-6-oxo-2,3,4,7-tetrahydro-1,5-benzoxazonin-9-yl]-2-(1-tetrazolyl)acetamide			ChEBI=CHEBI:108751;CHEBI:108771;CHEBI:108910;CHEBI:113747;CHEBI:113870;CHEBI:124654			C33H39N7O5			7.3038
Negative	617.153	14.02	455.19556:521 503.13983:3695	[M-H]-			yes	3.0015e-06	13.839	4.8356e-05	14.877	Other	Tetracenequinones			8-demethyl-8-(2-O-methyl-alpha-L-rhamnosyl)tetracenomycin C			ChEBI=CHEBI:78285,PubChem=86289506			C29H30O15			6.6424
Negative	619.269	9.07	205.07597:56 222.78876:162 241.04913:1326 259.12585:681 303.20978:4928 314.95297:1910 333.08777:109 350.26056:317 351.18854:100 393.19836:57 439.13422:1390 457.35077:84 458.94196:70 531.00372:52 598.88055:143	[M-H]-			yes	0.0023662	-10.431	0.007224	-9.6611	Other	Bufanolides and derivatives	Pentacarboxylic acids and derivatives		Lanceotoxin A	Euphorbiaproliferin C		KNApSAcK=C00003628,ChEBI=CHEBI:6371,UNPD=UNPD177565	ChEBI=CHEBI:69714,UNPD=UNPD204267		C32H44O12	C32H44O12		7.2788	6.9299
Negative	619.289	7.65	223.16531:121 241.02292:567 253.24396:64 259.1788:263 303.19257:2672 304.03751:184 315.03503:1069 316.03918:146 332.92108:58 439.01166:1064 596.26117:60	[M-H]-			yes	0.0023467	-7.9786	0.010149	-7.3716	Phospholipid	1-acyl-sn-glycerol-3-phosphoinositols			1-Arachidonoylglycerophosphoinositol			HMDB=HMDB0061690;HMDB0062722,ChEBI=CHEBI:83053;CHEBI:133065,LipidMAPS=LMGP06050006			C29H49O12P			8.6132
Negative	623.489	5.13	563.39069:90	[M-H]-			yes	0.000554	-8.6922	0.00055047	-9.0077	Other	Annonaceous acetogenins	Annonaceous acetogenins	Annonaceous acetogenins	Squamoxinone	Asitrilobin D	Annomutacin	HMDB=HMDB0031893,FooDB=FDB008578;FDB015239,UNPD=UNPD146388;UNPD28755	HMDB=HMDB0035389,FooDB=FDB014064,UNPD=UNPD108877	HMDB=HMDB0031749,KNApSAcK=C00040880;C00043267;C00043395;C00044084,FooDB=FDB008418;FDB011461;FDB019550,UNPD=UNPD126629;UNPD153251;UNPD2613;UNPD39396;UNPD81163;UNPD96709	C37H68O7	C37H68O7	C37H68O7	7.6218	7.5261	7.5233
Negative	625.505	5.12	478.17157:53 564.9549:687 565.58362:1138	[M-H]-			yes	0.0036505	-8.9686	0.00043836	-9.229	No annotation
Negative	640.326	9.51	196.11816:65 214.01877:66 238.05338:124 268.05078:349 281.12329:7197 417.01965:73 435.29834:194 478.15363:25700 478.77319:124 500.20117:52 520.28693:3715 550.25104:931 562.1861:78 619.78522:61 622.32104:629	[M-H]-			yes	0.030285	-10.26	0.0031558	-8.8032	Steroid	Steroid glucuronide conjugates			(3a,5b,7a,12a)-24-[(carboxymethyl)amino]-1,12-dihydroxy-24-oxocholan-3-yl-b-D-Glucopyranosiduronic acid			HMDB=HMDB0002472,ChEBI=CHEBI:89282,FooDB=FDB023010,BMDB=BMDB02472,LipidMAPS=LMST05010029;LMST05010053,Urine=HMDB0002472			C32H51NO12			8.427
Negative	645.477	4.21	283.23788:355 361.08838:691 362.27612:299	[M-H]-			yes	0.0016479	-8.7598	0.00013376	-9.0499	Glycoside	Steroidal glycosides	1-alkyl,2-acylglycerophosphates	1-(1Z-alkenyl),2-acyl-glycerophosphates	cholesteryl 6-O-hexanoyl-beta-D-galactoside	PA(O-18:0/15:1(9Z))	PA(P-18:0/15:0)	ChEBI=CHEBI:61651	LipidMAPS=LMGP10020024	LipidMAPS=LMGP10030032	C39H66O7	C36H71O7P	C36H71O7P	7.2694	7.1127	6.9751
Positive	652.226	14.19	258.94:101 271.08777:131 288.94565:316 324.81616:1132 342.61877:88 343.23907:60 472.20032:113 486.83923:131 489.74817:260	[M+H]+			yes	0.0053746	8.7148	0.0018133	11.067	No annotation
Negative	656.884	16.41	204.98807:163 249.07069:3602 290.97739:53 385.04077:7137 426.93243:337 504.84802:64 520.8255:102588 521.43195:248 562.80829:348	[M-H]-			yes	0.013244	11.835	0.13516	12.195	No annotation
Negative	659.513	7.53	365.15875:412 598.33777:232 599.51093:72 637.54578:51	[M-H]-			yes	0.00021506	-9.6538	5.9548e-05	-9.8447	Phospholipid	Phosphoethanolamines	Phosphosphingolipids	Phosphoethanolamines	N-(icosanoyl)-tetradecasphing-4-enine-1-phosphoethanolamine	N-tridecanoylsphingosine-1-phosphocholine	PE-Cer(d16:1(4E)/18:0)	ChEBI=CHEBI:86518,LipidMAPS=LMSP03020005	ChEBI=CHEBI:85023	LipidMAPS=LMSP03020020	C36H73N2O6P	C36H73N2O6P	C36H73N2O6P	7.0684	6.5608	6.5598
Positive	661.527	7.53	208.32721:94 501.84717:156 502.49078:843 520.14581:25800 600.2193:209 642.40912:730 643.09644:5759	[M+H]+			yes	0.001521	-10.457	0.0001275	-10.739	Phospholipid	Phosphoethanolamines	Phosphoethanolamines	Phosphosphingolipids	N-(icosanoyl)-tetradecasphing-4-enine-1-phosphoethanolamine	PE-Cer(d16:1(4E)/18:0)	N-tridecanoylsphingosine-1-phosphocholine	ChEBI=CHEBI:86518,LipidMAPS=LMSP03020005	LipidMAPS=LMSP03020020	ChEBI=CHEBI:85023	C36H73N2O6P	C36H73N2O6P	C36H73N2O6P	6.9877	6.5684	6.5448
Negative	662.101	18.92	539.8714:7206 540.51697:79	[M-H]-			yes	0.001854	-8.0046	0.0010437	-8.2482	Nucleotide	Purine nucleotide sugars			Fenugreekine			HMDB=HMDB0039421,DrugBank=DB04071,FooDB=FDB019002			C21H27N7O14P2			7.9165
Positive	663.452	5.08	283.39581:99 495.0752:10919 550.98938:67127 551.7663:123 607.03204:6760	[M+H]+			yes	0.00028389	-8.1838	0.00020578	-9.473	Glycoside	Cucurbitacin glycosides			Goyaglycoside c			HMDB=HMDB0038349,KNApSAcK=C00030425;C00030426,FooDB=FDB017685;FDB017686,UNPD=UNPD24869;UNPD52603;UNPD212307			C38H62O9			5.7782
Positive	663.454	11.6	495.35968:1668 551.2569:15746 551.9292:54 607.22803:31746 607.94104:133 648.4043:146	[M+H]+			yes	0.0031379	10.716	0.011257	12.258	Glycoside	Cucurbitacin glycosides			Goyaglycoside c			HMDB=HMDB0038349,KNApSAcK=C00030425;C00030426,FooDB=FDB017685;FDB017686,UNPD=UNPD24869;UNPD52603;UNPD212307			C38H62O9			7.4237
Negative	672.859	16.31	248.96545:538 384.9906:1465 426.96106:71 520.83868:22964 521.55426:72 536.69849:1355	[M-H]-			yes	0.0017545	9.9389	0.096257	10.861	No annotation
Positive	684.256	14.78	341.02087:69 429.09668:60 469.18829:95	[M+H]+			yes	0.0014273	10.936	0.0098265	10.344	No annotation
Negative	686.455	12.94	253.18234:18224 432.07684:248 449.66138:256 450.27466:1792	[M-H]-			yes	0.0036756	-11.985	0.00014836	-12.253	No annotation
Negative	686.477	6.34	227.3483:88 253.22934:30027 253.94507:183 279.15454:131 281.25714:90 432.13745:459 450.09265:3501	[M-H]-			yes	0.00096974	-10.923	1.5934e-05	-11.278	Phospholipid	Phosphatidylethanolamines	Phosphatidylethanolamines	Phosphatidylethanolamines	PE(16:1(9Z)/16:1(9Z))	PE(14:1(9Z)/18:1(9Z))	PE(18:1(9Z)/14:1(9Z))	HMDB=HMDB0008957,ChEBI=CHEBI:138145;CHEBI:138792,YMDB=YMDB01202,FooDB=FDB026147,BMDB=BMDB08957,LipidMAPS=LMGP02010108,ECMDB=ECMDB08957	HMDB=HMDB0008861,FooDB=FDB026051,BMDB=BMDB08861,LipidMAPS=LMGP02010433	HMDB=HMDB0009053,FooDB=FDB026243,BMDB=BMDB09053,LipidMAPS=LMGP02010637	C37H70NO8P	C37H70NO8P	C37H70NO8P	8.1367	7.6982	7.6982
Negative	687.545	11.63	253.33505:63 365.1076:179 393.05884:68 626.41772:163 651.1236:69	[M-H]-			yes	0.0014409	-9.1245	4.035e-05	-9.2063	Sphingolipid	Phosphosphingolipids	Sphingomyelins	Phosphoethanolamines	N-pentadecanoylsphingosine-1-phosphocholine	N-(heptadecanoyl)hexadecasphingosine-1-phosphocholine	PE-Cer(d14:1(4E)/22:0)	ChEBI=CHEBI:64485,LipidMAPS=LMSP03010038	ChEBI=CHEBI:136272,LipidMAPS=LMSP03010037	LipidMAPS=LMSP03020008	C38H77N2O6P	C38H77N2O6P	C38H77N2O6P	7.1793	7.1638	6.8912
Negative	688.471	13.32	253.13373:12232 254.16647:1400 255.17451:4075 281.17303:351 365.32629:58 391.2251:52 424.25677:51 431.45148:57 432.26581:71 434.2074:202 450.31793:685 451.18604:360 452.21423:1160 608.11597:51	[M-H]-		yes	yes	0.1155	-12.208	0.00083152	-12.825	No annotation
Negative	688.492	6.32	253.25043:10338 254.38458:501 255.40005:3974 281.27747:410 434.04254:166 450.07013:142 451.6355:254 452.30286:1525	[M-H]-			yes	0.0031875	-10.721	5.7606e-05	-10.968	Phospholipid	Phosphatidylethanolamines	Phosphatidylethanolamines	Phosphatidylethanolamines	PE(16:0/16:1(9Z))	PE(18:1(9Z)/14:0)	PE(14:0/18:1(9Z))	HMDB=HMDB0008924,ChEBI=CHEBI:73999,YMDB=YMDB01199,FooDB=FDB026114,BMDB=BMDB08924,LipidMAPS=LMGP02011228,ECMDB=ECMDB08924	HMDB=HMDB0009052,ChEBI=CHEBI:78814;CHEBI:82840,FooDB=FDB026242,BMDB=BMDB09052,LipidMAPS=LMGP02011199	HMDB=HMDB0008828,ChEBI=CHEBI:84300;CHEBI:85237,FooDB=FDB026018,BMDB=BMDB08828,LipidMAPS=LMGP02011247	C37H72NO8P	C37H72NO8P	C37H72NO8P	8.6014	8.5376	8.5376
Negative	688.833	16.23	248.98016:100 384.97064:262 536.73773:2906 537.36597:65 552.72418:53	[M-H]-			yes	0.00056057	7.7696	0.023589	9.757	No annotation
Positive	689.558	7.41	309.2691:54 530.34442:284 548.29053:14425 549.0047:55 628.13019:194 670.52521:509 671.29248:3425	[M+H]+			yes	0.0082722	-9.9056	0.00053989	-8.2086	Sphingolipid	Sphingomyelins	Phosphosphingolipids	Phosphoethanolamines	N-(heptadecanoyl)hexadecasphingosine-1-phosphocholine	N-pentadecanoylsphingosine-1-phosphocholine	PE-Cer(d16:1(4E)/20:0)	ChEBI=CHEBI:136272,LipidMAPS=LMSP03010037	ChEBI=CHEBI:64485,LipidMAPS=LMSP03010038	LipidMAPS=LMSP03020022	C38H77N2O6P	C38H77N2O6P	C38H77N2O6P	6.8738	6.8738	6.4669
Positive	690.505	6.34	237.35222:155 280.31708:149 282.3302:69 283.27548:84 311.21143:59 418.2962:112 436.11627:131 453.63147:51 547.08643:572 549.23468:63691 550.04968:104	[M+H]+			yes	0.0074408	-8.9039	0.00014651	-8.3702	Phospholipid	Phosphatidylethanolamines	Phosphatidylethanolamines	Phosphatidylethanolamines	PE(16:0/16:1(9Z))	PE(18:1(9Z)/14:0)	PE(14:0/18:1(9Z))	HMDB=HMDB0008924,ChEBI=CHEBI:73999,YMDB=YMDB01199,FooDB=FDB026114,BMDB=BMDB08924,LipidMAPS=LMGP02011228,ECMDB=ECMDB08924	HMDB=HMDB0009052,ChEBI=CHEBI:78814;CHEBI:82840,FooDB=FDB026242,BMDB=BMDB09052,LipidMAPS=LMGP02011199	HMDB=HMDB0008828,ChEBI=CHEBI:84300;CHEBI:85237,FooDB=FDB026018,BMDB=BMDB08828,LipidMAPS=LMGP02011247	C37H72NO8P	C37H72NO8P	C37H72NO8P	8.7006	8.7006	8.7006
Negative	698.888	13.01	366.7074:684 532.82062:1501 631.09833:54 637.78339:51 639.01233:72 678.05853:65 678.95508:107	[M-H]-				0.37632	-2.4135	0.14148	-3.7317	No annotation
Positive	703.574	7.4	283.43045:61 544.15881:97 562.2348:664 626.23041:59 685.11127:1303	[M+H]+			yes	0.00018682	-10.601	1.1305e-05	-8.2112	Sphingolipid	Sphingomyelins	Phosphosphingolipids	Phosphoethanolamines	N-(octadecanoyl)hexadecasphingosine-1-phosphocholine	SM(d18:0/16:1(9Z))	PE-Cer(d14:1(4E)/23:0)	ChEBI=CHEBI:136273,LipidMAPS=LMSP03010042	HMDB=HMDB0013464,ChEBI=CHEBI:90008,FooDB=FDB029464,Urine=HMDB0013464,Saliva=HMDB0013464,CSF=HMDB0013464,Serum=HMDB0013464	LipidMAPS=LMSP03020010	C39H79N2O6P	C39H79N2O6P	C39H79N2O6P	6.3387	6.3385	5.9965
Positive	704.501	12.52	405.28632:51 468.08411:120 494.2713:71 562.39264:193 685.7818:172	[M+H]+			yes	0.0034584	-9.0013	0.00038911	-8.9607	No annotation
Positive	704.521	6.35	450.271:53 476.29657:107 563.32318:357 686.22955:52	[M+H]+			yes	5.9517e-05	-7.6085	6.4185e-05	-6.4621	Phospholipid	Phosphatidylcholines	Phosphatidylcholines	Phosphatidylethanolamines	PC(14:0/16:1(9Z))	PC(16:1(9Z)/14:0)	PE(15:0/18:1(9Z))	HMDB=HMDB0007870,ChEBI=CHEBI:84578,YMDB=YMDB01177,FooDB=FDB025062,BMDB=BMDB07870,LipidMAPS=LMGP01010485	HMDB=HMDB0007998,FooDB=FDB025189,BMDB=BMDB07998,LipidMAPS=LMGP01011475	HMDB=HMDB0008894,FooDB=FDB026084,BMDB=BMDB08894,LipidMAPS=LMGP02010458	C38H74NO8P	C38H74NO8P	C38H74NO8P	8.1259	7.7092	7.7002
Negative	712.47	13.3	253.16214:11105 279.11163:9931 281.36475:80 432.06323:227 450.26221:855 451.84711:57 458.21375:190 476.25061:1430 564.93781:73	[M-H]-			yes	0.0011374	-11.62	0.0032799	-3.3474	No annotation
Negative	714.485	9.5	253.22803:2777 254.21867:80 255.23077:1394 279.12231:2188 280.3208:258 281.19586:4918 450.25574:543 452.258:397 476.16675:170 478.26202:291 529.01154:92 680.11322:51 693.85876:61	[M-H]-		yes	yes	0.36976	-9.8725	0.0010439	-11.738	No annotation
Negative	714.508	6.17	214.17581:63 253.25937:16247 254.23329:420 255.39011:941 279.16513:2395 281.20724:25414 432.0155:209 450.22406:2886 451.47577:173 452.16547:253 460.05048:369 476.12836:85 478.1203:1964 506.38916:70	[M-H]-			yes	0.0029815	-8.7592	8.205e-07	-11.563	Phospholipid	Phosphatidylethanolamines	Phosphatidylethanolamines	Phosphatidylethanolamines	PE(18:1(9Z)/16:1(9Z))	PE(16:0/18:2(9Z,12Z))	PE(16:1(9Z)/18:1(9Z))	HMDB=HMDB0009056,ChEBI=CHEBI:78810;CHEBI:82837,FooDB=FDB026246,BMDB=BMDB09056,LipidMAPS=LMGP02011198	HMDB=HMDB0008928,ChEBI=CHEBI:73008;CHEBI:73121,FooDB=FDB026118,BMDB=BMDB08928,LipidMAPS=LMGP02010042,UNPD=UNPD147922	HMDB=HMDB0008960,YMDB=YMDB01203,FooDB=FDB026150,BMDB=BMDB08960,LipidMAPS=LMGP02011220	C39H74NO8P	C39H74NO8P	C39H74NO8P	8.6438	8.6204	8.2271
Negative	716.501	12.94	253.32358:625 255.15314:3033 281.29382:7745 282.28516:59 283.23309:301 434.27167:95 452.25171:768 460.01361:55 478.20215:79 480.23566:185 696.26038:106	[M-H]-			yes	0.041754	-5.5973	0.0015465	-11.039	No annotation
Positive	716.522	3	573.62671:281 574.90295:3123 575.58716:31310 698.9411:64	[M+H]+			yes	6.7886e-07	10.728	0.0022663	11.276	Phospholipid	Phosphatidylethanolamines	Phosphatidylethanolamines	Phosphatidylethanolamines	PE(18:1(9Z)/16:1(9Z))	PE(16:0/18:2(9Z,12Z))	PE(20:1(11Z)/14:1(9Z))	HMDB=HMDB0009056,ChEBI=CHEBI:78810;CHEBI:82837,FooDB=FDB026246,BMDB=BMDB09056,LipidMAPS=LMGP02011198	HMDB=HMDB0008928,ChEBI=CHEBI:73008;CHEBI:73121,FooDB=FDB026118,BMDB=BMDB08928,LipidMAPS=LMGP02010042,UNPD=UNPD147922	HMDB=HMDB0009251,FooDB=FDB026441,BMDB=BMDB09251,LipidMAPS=LMGP02010844	C39H74NO8P	C39H74NO8P	C39H74NO8P	7.2945	7.2938	6.8778
Positive	718.517	12.93	447.28137:54 575.57257:122 577.30914:4964	[M+H]+		yes	yes	0.12426	-7.9697	0.000597	-9.051	No annotation
Negative	719.202	19.28	376.92596:202	[M-H]-			yes	0.00035347	-8.9082	0.00034026	-9.2333	No annotation
Negative	719.487	4.53	209.33257:78 227.16901:546 245.29263:88 253.23682:40205 255.27315:25740 256.26669:188 281.16901:676 389.1955:915 391.1145:6690 391.73376:119 416.50507:55 436.93665:117 462.63538:348 463.27063:936 465.00317:4105 480.38593:131 481.20605:1558 483.04767:6993 483.82104:134 491.172:146 550.72809:123 645.29047:385 683.74689:52 687.35223:136	[M-H]-			yes	0.00021375	-12.107	6.7944e-05	-12.386	Phospholipid	Phosphatidylglycerols	Phosphatidylglycerols	Phosphatidylglycerols	1-myristoyl-2-oleoyl-sn-glycero-3-phosphatidylglycerol(1-)	PG(16:1(9Z)/16:0)	PG(16:0/16:1(9Z))	ChEBI=CHEBI:75161,LipidMAPS=LMGP04010984	HMDB=HMDB0010585,FooDB=FDB027735,BMDB=BMDB10585,LipidMAPS=LMGP04010207,ECMDB=ECMDB10585	HMDB=HMDB0010571,YMDB=YMDB01209,BMDB=BMDB10571,LipidMAPS=LMGP04010910,ECMDB=ECMDB10571	C38H73O10P	C38H73O10P	C38H73O10P	7.7121	7.6726	7.6726
Positive	720.231	14.44	216.09047:312	[M+H]+			yes	0.000554	10.472	0.01043	10.59	Other	Xanthenes			texas red-X			ChEBI=CHEBI:52292			C37H41N3O8S2			6.0279
Positive	730.516	12.6	476.29169:1231 494.44061:369 547.48694:126 548.20428:93 588.54767:124 669.28381:444 711.04633:83	[M+H]+			yes	0.00082421	-12.249	0.0001201	-12.241	Phospholipid	Dialkylglycerophosphoethanolamines			1-(6-[5]-ladderane-hexanyl)-2-(8-[3]-ladderane-octanyl)-sn-glycerophosphoethanolamine			LipidMAPS=LMGP02040013			C43H72NO6P			6.1568
Positive	730.537	6.29	382.8045:71 476.18994:816 493.95093:581 522.33252:74 589.19824:1013	[M+H]+			yes	1.8287e-05	-6.7188	1.0679e-05	-5.9495	Phospholipid	Phosphatidylcholines	Phosphatidylcholines	Phosphatidylethanolamines	PC(16:1(9Z)/16:1(9Z))	PC(14:0/18:2(9Z,12Z))	PE(15:0/20:2(11Z,14Z))	HMDB=HMDB0008002,ChEBI=CHEBI:83717;CHEBI:84798,YMDB=YMDB01185,FooDB=FDB025193,BMDB=BMDB08002,LipidMAPS=LMGP01010682;LMGP01010684,Serum=HMDB0008002	HMDB=HMDB0007874,ChEBI=CHEBI:86094,FooDB=FDB025066,BMDB=BMDB07874,LipidMAPS=LMGP01010496,Urine=HMDB0007874,Serum=HMDB0007874	HMDB=HMDB0008901,FooDB=FDB026091,BMDB=BMDB08901,LipidMAPS=LMGP02010465	C40H76NO8P	C40H76NO8P	C40H76NO8P	6.746	6.7106	6.3211
Negative	732.482	5.83	253.28455:329 255.25034:732 281.31534:189 363.31146:88 389.10663:875 390.56891:352 391.24323:1428 407.2049:117 409.21484:690 417.11285:96 644.56958:1038 645.17694:7641 646.33093:94	[M-H]-			yes	0.0018636	-8.1989	8.9456e-05	-8.4096	Phospholipid	Phosphatidylserines	Phosphatidylserines	Phosphatidylserines	PS(16:0/16:1(9Z))	PS(16:1(9Z)/16:0)	PS(14:0/18:1(9Z))	HMDB=HMDB0012355,ChEBI=CHEBI:89824,YMDB=YMDB01252,FooDB=FDB028973,BMDB=BMDB12355,LipidMAPS=LMGP03010909,ECMDB=ECMDB12355,Serum=HMDB0012355	HMDB=HMDB0012365,ChEBI=CHEBI:90028,BMDB=BMDB12365,LipidMAPS=LMGP03010207,ECMDB=ECMDB12365,Serum=HMDB0012365	HMDB=HMDB0012335,ChEBI=CHEBI:89837,FooDB=FDB028954,BMDB=BMDB12335,LipidMAPS=LMGP03010977,Serum=HMDB0012335	C38H72NO10P	C38H72NO10P	C38H72NO10P	8.3723	8.3723	8.3617
Positive	732.531	12.62	363.03125:235 475.99414:75 477.2403:194 494.11401:204 495.25641:456 496.04974:300 496.6651:108 549.12341:104	[M+H]+	yes	yes	yes	0.1088	-11.564	0.00028681	-12.187	Phospholipid	Dialkylglycerophosphoethanolamines			1-(6-[3]-ladderane-hexanyl)-2-(8-[3]-ladderane-octanyl)-sn-glycerophosphoethanolamine			LipidMAPS=LMGP02040016			C43H74NO6P			6.253
Positive	732.554	7.92	476.37543:77 496.51929:100	[M+H]+			yes	0.0049559	1.4115	0.00092646	2.3412	Phospholipid	Phosphatidylcholines	Phosphatidylcholines	Phosphatidylcholines	PC(16:1(9Z)/16:0)	PC(16:0/16:1(9Z))	PC(18:0/14:1(9Z))	HMDB=HMDB0008001,ChEBI=CHEBI:89731,YMDB=YMDB01864,FooDB=FDB025192,BMDB=BMDB08001,LipidMAPS=LMGP01011479,Urine=HMDB0008001,Serum=HMDB0008001	HMDB=HMDB0007969,ChEBI=CHEBI:74000,YMDB=YMDB01181,FooDB=FDB025160,BMDB=BMDB07969,LipidMAPS=LMGP01010566,Urine=HMDB0007969,Serum=HMDB0007969	HMDB=HMDB0008032,ChEBI=CHEBI:89667,YMDB=YMDB01888,FooDB=FDB025223,BMDB=BMDB08032,LipidMAPS=LMGP01011582,Urine=HMDB0008032,Serum=HMDB0008032	C40H78NO8P	C40H78NO8P	C40H78NO8P	7.9337	7.9337	7.7259
Positive	738.482	13.2	313.32791:131 413.11206:183 441.15491:389 456.28284:97 459.05383:69 484.11987:95 501.19855:61 574.28943:121 575.44318:1800 595.62274:136 596.35516:892 597.37323:7452 598.0191:64 614.69171:130 615.3269:480	[M+H]+		yes	yes	0.065053	-8.5989	0.0002739	-9.2524	No annotation
Positive	738.527	4.54	439.17755:98 467.23767:173 481.27271:103 493.06763:75 495.33405:113 521.47729:103 549.22614:251	[M+H]+			yes	8.7391e-08	-11.322	1.0008e-05	-11.548	No annotation
Negative	740.5	10.47	277.33521:110 279.1947:9849 280.22711:691 281.22952:15535 282.16815:495 283.26605:56 324.85663:52 417.26923:54 458.03448:201 460.17249:162 476.18701:1638 477.15277:85 478.12543:703 671.7627:115	[M-H]-		yes	yes	0.37443	-10.85	0.00048404	-12.8	No annotation
Negative	740.524	6.04	277.16214:53 279.27283:6673 281.23486:13505 282.31824:100 283.43683:74 305.2348:58 458.00562:105 476.0957:2001 478.10699:756	[M-H]-			yes	0.0033607	-10.33	4.0346e-05	-8.5545	Phospholipid	Phosphatidylethanolamines	Phosphatidylethanolamines	Phosphatidylethanolamines	PE(18:1(9Z)/18:2(9Z,12Z))	PE(16:0/20:3(8Z,11Z,14Z))	PE(18:2(9Z,12Z)/18:1(9Z))	HMDB=HMDB0009060,ChEBI=CHEBI:74977;CHEBI:84543,FooDB=FDB026250,BMDB=BMDB09060,LipidMAPS=LMGP02010048	HMDB=HMDB0008936,ChEBI=CHEBI:133655;CHEBI:133656,FooDB=FDB026126,BMDB=BMDB08936,LipidMAPS=LMGP02011222	HMDB=HMDB0009092,FooDB=FDB026282,BMDB=BMDB09092,LipidMAPS=LMGP02010663	C41H76NO8P	C41H76NO8P	C41H76NO8P	7.9913	7.9201	7.5746
Negative	742.516	13.33	279.13177:165 281.10367:11708 282.01935:216 283.28522:111 460.19525:142 478.14948:1190 505.5379:56 673.81335:88 674.4541:87 723.1413:57	[M-H]-		yes	yes	0.28048	-6.9599	0.0014367	-11.178	No annotation
Positive	742.537	6.03	319.35596:80 339.17694:77 575.53595:62 599.02802:105 601.23657:43689 601.87714:293	[M+H]+			yes	0.0041849	-8.4936	0.00092336	-7.1012	Phospholipid	Phosphatidylethanolamines	Phosphatidylethanolamines	Phosphatidylethanolamines	PE(16:0/20:3(8Z,11Z,14Z))	PE(18:1(9Z)/18:2(9Z,12Z))	PE(20:2(11Z,14Z)/16:1(9Z))	HMDB=HMDB0008936,ChEBI=CHEBI:133655;CHEBI:133656,FooDB=FDB026126,BMDB=BMDB08936,LipidMAPS=LMGP02011222	HMDB=HMDB0009060,ChEBI=CHEBI:74977;CHEBI:84543,FooDB=FDB026250,BMDB=BMDB09060,LipidMAPS=LMGP02010048	HMDB=HMDB0009287,FooDB=FDB026477,BMDB=BMDB09287,LipidMAPS=LMGP02010878	C41H76NO8P	C41H76NO8P	C41H76NO8P	8.1303	8.1222	7.7143
Positive	742.539	2.12	308.26578:52 339.56317:51 479.86621:52 573.4295:62 599.86676:129 601.54449:13944 602.19745:64	[M+H]+			yes	1.1163e-05	10.381	0.002478	11.01	Phospholipid	Phosphatidylethanolamines	Phosphatidylethanolamines	Phosphatidylethanolamines	PE(18:1(9Z)/18:2(9Z,12Z))	PE(16:0/20:3(8Z,11Z,14Z))	PE(20:2(11Z,14Z)/16:1(9Z))	HMDB=HMDB0009060,ChEBI=CHEBI:74977;CHEBI:84543,FooDB=FDB026250,BMDB=BMDB09060,LipidMAPS=LMGP02010048	HMDB=HMDB0008936,ChEBI=CHEBI:133655;CHEBI:133656,FooDB=FDB026126,BMDB=BMDB08936,LipidMAPS=LMGP02011222	HMDB=HMDB0009287,FooDB=FDB026477,BMDB=BMDB09287,LipidMAPS=LMGP02010878	C41H76NO8P	C41H76NO8P	C41H76NO8P	8.445	8.4443	8.0284
Negative	743.248	19.86	400.62579:54 682.96442:83	[M-H]-		yes	yes	0.096564	-7.9167	0.0094256	-8.039	No annotation
Positive	744.532	12.98	447.15546:127 465.51221:76 602.45068:1120 603.30023:6190 621.26733:70	[M+H]+		yes	yes	0.11179	-7.547	0.000597	-8.7092	No annotation
Positive	744.554	2.16	575.55408:115 601.69348:133 603.42194:13245	[M+H]+			yes	9.8152e-05	8.1523	0.0079394	10.794	Phospholipid	Phosphatidylethanolamines	Phosphatidylethanolamines	Phosphatidylcholines	PE(18:1(9Z)/18:1(9Z))	PE(18:0/18:2(9Z,12Z))	PC(15:0/18:2(9Z,12Z))	HMDB=HMDB0009059,ChEBI=CHEBI:60285;CHEBI:74986;CHEBI:84839;CHEBI:84844,YMDB=YMDB01208,FooDB=FDB026249,BMDB=BMDB09059,LipidMAPS=LMGP02010039;LMGP02010052,PubChem=44251425	HMDB=HMDB0008994,ChEBI=CHEBI:133599;CHEBI:133600,FooDB=FDB026184,BMDB=BMDB08994,LipidMAPS=LMGP02010044,PubChem=25245827,PlantCyc=CPD-8290	HMDB=HMDB0007940,ChEBI=CHEBI:133617,SMPDB=PW_C003990,FooDB=FDB025132,BMDB=BMDB07940,LipidMAPS=LMGP01010543	C41H78NO8P	C41H78NO8P	C41H78NO8P	8.9315	8.9308	8.7778
Negative	745.481	13.33	227.10849:66 255.14542:4280 279.17926:6197 280.20673:205 281.38995:204 391.14221:223 415.10577:896 465.26105:401 483.24493:502 489.22211:363 507.21674:1538 508.22388:1815 509.25153:422 596.27313:76 672.40796:60 676.66156:62	[M-H]-			yes	0.0029697	-9.7789	0.0046525	-9.4179	Phospholipid	1,2-diacylglycerol-3-phosphates	1,2-diacylglycerol-3-phosphates	1,2-diacylglycerol-3-phosphates	PA(18:1(9Z)/22:6(4Z,7Z,10Z,13Z,16Z,19Z))	PA(20:5(5Z,8Z,11Z,14Z,17Z)/20:2(11Z,14Z))	PA(20:2(11Z,14Z)/20:5(5Z,8Z,11Z,14Z,17Z))	HMDB=HMDB0114943,ChEBI=CHEBI:138723,LipidMAPS=LMGP10010040	HMDB=HMDB0115587,LipidMAPS=LMGP10010667	HMDB=HMDB0115550,LipidMAPS=LMGP10010580	C43H71O8P	C43H71O8P	C43H71O8P	8.1088	7.7064	7.7008
Negative	745.503	4.51	209.37442:154 226.96194:339 235.03806:85 245.32007:101 253.24226:15607 255.27887:18012 256.48734:61 257.21506:131 261.27353:435 277.22748:146 279.31744:36876 281.23029:26011 282.02423:631 389.17456:1615 391.01318:4342 391.94397:167 415.22504:547 417.13269:2803 417.8266:67 463.13214:1076 465.2616:3289 481.24548:1734 483.0343:4949 484.3111:62 485.27478:60 489.02997:300 491.09601:1697 507.05792:467 …	[M-H]-			yes	0.00055509	-12.625	2.7971e-05	-12.993	Phospholipid	Phosphatidylglycerols	Phosphatidylglycerols	Phosphatidylglycerols	PG(16:0/18:2(9Z,12Z))	PG(18:2(9Z,12Z)/16:0)	PG(18:1(9Z)/16:1(9Z))	HMDB=HMDB0010575,ChEBI=CHEBI:72840;CHEBI:73238,FooDB=FDB027725,BMDB=BMDB10575,LipidMAPS=LMGP04010983,Serum=HMDB0010575,UNPD=UNPD141988	HMDB=HMDB0010645,ChEBI=CHEBI:89351,FooDB=FDB027795,BMDB=BMDB10645,LipidMAPS=LMGP04010877,Serum=HMDB0010645,PubChem=90658491,PlantCyc=CPD-8086	HMDB=HMDB0010631,ChEBI=CHEBI:89398,DrugBank=DB04683,BMDB=BMDB10631,LipidMAPS=LMGP04010881,Serum=HMDB0010631	C40H75O10P	C40H75O10P	C40H75O10P	7.6365	7.6365	7.4879
Negative	747.518	4.51	253.14615:554 255.22424:7704 256.23959:248 257.4635:94 279.33679:588 281.19403:19088 282.24435:718 283.33868:385 391.04431:1746 393.03699:52 409.22797:122 417.18585:468 419.18005:109 463.58862:63 465.11108:1200 467.06305:59 481.99335:76 483.24396:1737 484.01086:152 485.33301:66 491.10022:379 492.14368:75 493.15021:62 509.1554:352 511.35144:84 715.42896:94	[M-H]-			yes	0.00042579	-12.504	1.0877e-05	-12.791	Phospholipid	Phosphatidylglycerols	Phosphatidylglycerols	Phosphatidylglycerols	PG(18:1(9Z)/16:0)	PG(16:0/18:1(9Z))	PG(16:0/18:1(11Z))	HMDB=HMDB0010630,ChEBI=CHEBI:72832;CHEBI:73206,BMDB=BMDB10630,LipidMAPS=LMGP04010962,Serum=HMDB0010630,PubChem=71296223,PlantCyc=CPD-2183	HMDB=HMDB0010574,ChEBI=CHEBI:34080;CHEBI:72841;CHEBI:73234;CHEBI:84472,YMDB=YMDB01210,BMDB=BMDB10574,LipidMAPS=LMGP04010002;LMGP04010987,Serum=HMDB0010574	HMDB=HMDB0010573,ChEBI=CHEBI:44946,FooDB=FDB027723,BMDB=BMDB10573,LipidMAPS=LMGP04010008,ECMDB=ECMDB10573,Serum=HMDB0010573	C40H77O10P	C40H77O10P	C40H77O10P	8.8665	8.8664	8.8664
Positive	752.498	12.59	439.14026:801 476.21448:218 498.23694:686 547.35822:3995 569.29572:31652 569.96368:245 611.3399:58 680.41205:76 693.11383:61883 693.84857:212 723.47992:77	[M+H]+			yes	0.000554	-10.632	0.00044439	-10.503	Other	Sulfatides	Phosphoglycosphingolipids		3-O-Sulfogalactosylceramide (d18:1/14:0)	PI-Cer(d18:1/14:0)		HMDB=HMDB0012312,FooDB=FDB028934,BMDB=BMDB12312	LipidMAPS=LMSP03030150		C38H73NO11S	C38H74NO11P		6.1731	5.9362
Positive	756.531	12.85	471.34723:60 476.30194:122 494.28296:73 502.17426:131 520.17163:95 572.52673:144 573.48914:64 614.36353:199 696.3299:386 697.2879:63 720.31183:54 726.01849:55	[M+H]+			yes	0.00016953	-10.35	0.00010837	-10.219	No annotation
Negative	758.498	5.72	253.36195:2569 255.41431:86 279.19937:171 281.32343:7699 387.76556:54 389.1073:4598 390.37421:77 391.12939:307 407.09064:859 408.97827:88 415.05042:514 416.59912:1004 417.24097:11752 433.29993:71 435.0896:3592 671.18469:61679 672.16498:66	[M-H]-			yes	0.00083166	-11.034	4.2571e-05	-7.8988	Phospholipid	Phosphatidylserines	Phosphatidylserines	Phosphatidylserines	PS(18:1(9Z)/16:1(9Z))	PS(16:1(9Z)/18:1(9Z))	PS(16:0/18:2(9Z,12Z))	HMDB=HMDB0012388,ChEBI=CHEBI:74901;CHEBI:75101,BMDB=BMDB12388,LipidMAPS=LMGP03010881,Serum=HMDB0012388	HMDB=HMDB0012368,ChEBI=CHEBI:90032,YMDB=YMDB01255,FooDB=FDB028986,BMDB=BMDB12368,LipidMAPS=LMGP03010901,Serum=HMDB0012368	HMDB=HMDB0012358,ChEBI=CHEBI:75031;CHEBI:89823,FooDB=FDB028976,BMDB=BMDB12358,LipidMAPS=LMGP03010976,Serum=HMDB0012358	C40H74NO10P	C40H74NO10P	C40H74NO10P	8.0977	8.0976	8.041
Positive	758.547	12.71	476.37451:569 494.34113:245 504.40472:408 522.23083:55 552.43097:113 574.39423:183 644.31354:72 697.93652:816 698.55109:104	[M+H]+	yes	yes	yes	0.12704	-11.759	0.00036643	-12.478	Phospholipid	Dialkylglycerophosphoethanolamines			1-(8-[5]-ladderane-octanyl)-2-(8-[3]-ladderane-octanyl)-sn-glycerophosphoethanolamine			LipidMAPS=LMGP02040014			C45H76NO6P			6.9187
Positive	758.57	2.12	420.59912:167 476.49243:661 478.71802:103 494.41235:389 496.27887:216 504.53088:424 518.17944:77 521.41895:141 522.51685:55 573.63458:55 575.56158:85 616.58746:72 722.0249:68 739.99493:97	[M+H]+			yes	1.126e-06	11.793	0.00025969	14.014	Phospholipid	Monomethylphosphatidylethanolamines	Phosphatidylcholines	Phosphatidylcholines	PE-NMe(18:1(9Z)/18:1(9Z))	PC(18:2(9Z,12Z)/16:0)	PC(16:0/18:2(9Z,12Z))	HMDB=HMDB0010565,ChEBI=CHEBI:85679;CHEBI:85962,FooDB=FDB027715,BMDB=BMDB10565,LipidMAPS=LMGP02010331;LMGP02010338	HMDB=HMDB0008133,ChEBI=CHEBI:86099,YMDB=YMDB01956,FooDB=FDB025323,BMDB=BMDB08133,LipidMAPS=LMGP01010932,Urine=HMDB0008133,Saliva=HMDB0008133,Serum=HMDB0008133	HMDB=HMDB0007973,ChEBI=CHEBI:73002;CHEBI:60475,DrugBank=DB02306,YMDB=YMDB01845,FooDB=FDB025164;FDB030253,BMDB=BMDB07973,LipidMAPS=LMGP01010592;LMGP01010594,Urine=HMDB0007973,Saliva=HMDB0007973,Serum=HMDB0007973,PubChem=6438359;5287971,PlantCyc=CPD-8158,UNPD=UNPD68627	C42H80NO8P	C42H80NO8P	C42H80NO8P	6.7758	6.7437	6.7433
Positive	760.511	5.71	323.86511:273 324.51041:68 430.94653:57 480.39594:341 488.33929:96 495.37396:84 498.30072:204 503.5282:57 537.84955:54 575.18689:26579 575.92828:132	[M+H]+			yes	3.914e-05	-9.0305	0.00018753	-7.9077	Phospholipid	Phosphatidylserines	Phosphatidylserines	Phosphatidylserines	PS(16:1(9Z)/18:1(9Z))	PS(18:1(9Z)/16:1(9Z))	PS(18:2(9Z,12Z)/16:0)	HMDB=HMDB0012368,ChEBI=CHEBI:90032,YMDB=YMDB01255,FooDB=FDB028986,BMDB=BMDB12368,LipidMAPS=LMGP03010901,Serum=HMDB0012368	HMDB=HMDB0012388,ChEBI=CHEBI:74901;CHEBI:75101,BMDB=BMDB12388,LipidMAPS=LMGP03010881,Serum=HMDB0012388	HMDB=HMDB0012398,ChEBI=CHEBI:90026,FooDB=FDB029014,BMDB=BMDB12398,LipidMAPS=LMGP03010877,Serum=HMDB0012398	C40H74NO10P	C40H74NO10P	C40H74NO10P	8.4506	8.4506	8.4501
Negative	762.509	5.98	257.27649:271 259.39465:301 279.18988:1641 280.12271:56 281.29831:1619 301.16138:1352 303.24704:2379 304.3512:53 418.7674:57 475.63544:159 476.30017:504 477.4989:145 478.19928:479 498.20215:128 674.19403:88 675.14594:484	[M-H]-			yes	0.00045601	-9.1468	9.7174e-06	-9.4409	Phospholipid	Phosphatidylethanolamines	Phosphatidylethanolamines	Phosphatidylethanolamines	PE(16:0/22:6(4Z,7Z,10Z,13Z,16Z,19Z))	PE(20:4(5Z,8Z,11Z,14Z)/18:2(9Z,12Z))	PE(18:2(9Z,12Z)/20:4(5Z,8Z,11Z,14Z))	HMDB=HMDB0008946,ChEBI=CHEBI:78261;CHEBI:79097,FooDB=FDB026136,BMDB=BMDB08946,LipidMAPS=LMGP02010095,UNPD=UNPD182353	HMDB=HMDB0009390,FooDB=FDB026580,BMDB=BMDB09390,LipidMAPS=LMGP02010945	HMDB=HMDB0009102,FooDB=FDB026292,BMDB=BMDB09102,LipidMAPS=LMGP02011192	C43H74NO8P	C43H74NO8P	C43H74NO8P	7.2278	7.0091	7.0088
Negative	762.531	6.41	227.41687:111 253.20471:195 279.35324:124 303.17389:144 688.19696:11522 688.94592:133 700.29425:75 702.6402:139	[M-H]-			yes	9.6665e-06	-8.1912	1.5604e-05	-8.5465	Phospholipid	Phosphatidylserines	Phosphatidylserines	Phosphatidylserines	PS(18:0/16:0)	PS(16:0/18:0)	PS(20:0/14:0)	HMDB=HMDB0012376,ChEBI=CHEBI:90035,FooDB=FDB028994,BMDB=BMDB12376,LipidMAPS=LMGP03010888,Serum=HMDB0012376	HMDB=HMDB0012356,ChEBI=CHEBI:84520,FooDB=FDB028974,BMDB=BMDB12356,LipidMAPS=LMGP03010906,Serum=HMDB0012356	HMDB=HMDB0112511,LipidMAPS=LMGP03010865	C40H78NO10P	C40H78NO10P	C40H78NO10P	6.223	6.223	5.8063
Positive	764.521	5.95	263.05023:53 267.13745:183 269.24689:182 287.36511:62 330.46118:92 337.25165:1212 339.12708:990 341.30969:52 351.31989:72 493.26556:178 521.24225:72 579.2373:115 621.09155:79 623.15094:25706 623.77899:138	[M+H]+			yes	0.00036562	-9.5049	0.00032496	-8.3075	Phospholipid	Phosphatidylethanolamines	Phosphatidylethanolamines	Phosphatidylethanolamines	PE(16:0/22:6(4Z,7Z,10Z,13Z,16Z,19Z))	PE(18:1(9Z)/20:5(5Z,8Z,11Z,14Z,17Z))	PE(20:2(11Z,14Z)/18:4(6Z,9Z,12Z,15Z))	HMDB=HMDB0008946,ChEBI=CHEBI:78261;CHEBI:79097,FooDB=FDB026136,BMDB=BMDB08946,LipidMAPS=LMGP02010095,UNPD=UNPD182353	HMDB=HMDB0009071,FooDB=FDB026261,BMDB=BMDB09071,LipidMAPS=LMGP02011195	HMDB=HMDB0009294,FooDB=FDB026484,BMDB=BMDB09294,LipidMAPS=LMGP02010887	C43H74NO8P	C43H74NO8P	C43H74NO8P	5.818	5.4013	5.4013
Negative	764.524	5.96	259.21863:382 279.00909:56 279.98508:52 281.31451:2664 282.22763:169 283.34619:187 301.14935:274 302.12027:125 303.27032:3906 304.35861:101 305.28806:145 478.20465:829 499.53125:56 500.17896:120	[M-H]-			yes	0.001287	-8.9063	2.1127e-06	-9.2199	Phospholipid	Phosphatidylethanolamines	Phosphatidylethanolamines	Phosphatidylethanolamines	PE(18:1(9Z)/20:4(5Z,8Z,11Z,14Z))	PE(20:4(5Z,8Z,11Z,14Z)/18:1(9Z))	PE(20:5(5Z,8Z,11Z,14Z,17Z)/18:0)	HMDB=HMDB0009069,ChEBI=CHEBI:74975;CHEBI:75169,FooDB=FDB026259,BMDB=BMDB09069,LipidMAPS=LMGP02011196	HMDB=HMDB0009389,FooDB=FDB026579,BMDB=BMDB09389,LipidMAPS=LMGP02010944	HMDB=HMDB0009453,FooDB=FDB026643,BMDB=BMDB09453,LipidMAPS=LMGP02010973	C43H76NO8P	C43H76NO8P	C43H76NO8P	8.5459	8.1292	7.9945
Positive	764.543	4.5	493.15039:217 521.24677:109	[M+H]+			yes	2.5709e-06	-12.004	7.8667e-05	-12.311	Phospholipid	Phosphatidylserines	Phosphatidylserines	Phosphatidylserines	PS(16:0/18:0)	PS(18:0/16:0)	PS(14:0/20:0)	HMDB=HMDB0012356,ChEBI=CHEBI:84520,FooDB=FDB028974,BMDB=BMDB12356,LipidMAPS=LMGP03010906,Serum=HMDB0012356	HMDB=HMDB0012376,ChEBI=CHEBI:90035,FooDB=FDB028994,BMDB=BMDB12376,LipidMAPS=LMGP03010888,Serum=HMDB0012376	HMDB=HMDB0112295,LipidMAPS=LMGP03010924	C40H78NO10P	C40H78NO10P	C40H78NO10P	7.5825	7.5825	7.1801
Positive	766.537	5.93	259.44022:51 269.38196:245 308.14743:99 330.41724:79 337.04279:75 338.60638:326 339.26324:2206 340.20593:84 341.38385:82 467.30304:64 484.37885:99 494.7572:169 495.43304:173 521.14966:127 523.2674:284 623.44232:256 625.1792:23199 749.17767:59	[M+H]+			yes	0.0015887	-7.0548	8.1254e-05	-6.5252	Phospholipid	Phosphatidylethanolamines	Phosphatidylethanolamines	Phosphatidylethanolamines	PE(18:1(9Z)/20:4(5Z,8Z,11Z,14Z))	PE(16:1(9Z)/22:4(7Z,10Z,13Z,16Z))	PE(22:4(7Z,10Z,13Z,16Z)/16:1(9Z))	HMDB=HMDB0009069,ChEBI=CHEBI:74975;CHEBI:75169,FooDB=FDB026259,BMDB=BMDB09069,LipidMAPS=LMGP02011196	HMDB=HMDB0008976,FooDB=FDB026166,BMDB=BMDB08976,LipidMAPS=LMGP02010538	HMDB=HMDB0009584,BMDB=BMDB09584,LipidMAPS=LMGP02011109	C43H76NO8P	C43H76NO8P	C43H76NO8P	7.8371	7.4221	7.4221
Positive	766.558	4.49	467.2937:76 493.10718:241 495.23145:740 507.2179:83 509.29413:156 520.54181:78 521.31512:467 523.29816:193 535.33984:77 549.34198:172 577.12799:164 749.19324:63	[M+H]+			yes	5.9426e-05	-11.842	3.7908e-05	-12.132	No annotation
Negative	767.487	4.48	253.41539:317 255.37068:1385 257.15967:472 277.27319:143 279.30014:158 281.2702:53 301.18591:1285 303.27679:663 390.9671:168 436.63879:79 463.14099:103 465.13007:162 481.05072:96 483.18518:691 511.03467:98 512.70477:67	[M-H]-			yes	0.0012949	-9.0156	0.00012502	-9.2908	Phospholipid	Phosphatidylglycerols	Phosphatidylglycerols	Phosphatidylglycerols	PG(16:1(9Z)/20:4(5Z,8Z,11Z,14Z))	PG(18:2(9Z,12Z)/18:3(6Z,9Z,12Z))	PG(18:2(9Z,12Z)/18:3(9Z,12Z,15Z))	HMDB=HMDB0010595,ChEBI=CHEBI:89072,FooDB=FDB027745,BMDB=BMDB10595,LipidMAPS=LMGP04010899,Serum=HMDB0010595	HMDB=HMDB0010651,ChEBI=CHEBI:89378,FooDB=FDB027801,BMDB=BMDB10651,LipidMAPS=LMGP04010351,Serum=HMDB0010651	HMDB=HMDB0010652,ChEBI=CHEBI:89376,FooDB=FDB027802,BMDB=BMDB10652,LipidMAPS=LMGP04010352,Serum=HMDB0010652	C42H73O10P	C42H73O10P	C42H73O10P	7.3944	7.2201	7.2201
Negative	773.534	4.48	279.23343:910 281.23755:15665 282.26254:516 283.34024:380 417.13336:1430 418.70142:131 491.05164:1223 491.96881:130 493.10315:55 509.19592:1712 510.14294:100 511.22614:107	[M-H]-			yes	0.00022723	-9.9268	1.3098e-05	-10.264	Phospholipid	Phosphatidylglycerols	Phosphatidylglycerols	Phosphatidylglycerols	PG(18:1(9Z)/18:1(9Z))	PG(18:0/18:2(9Z,12Z))	PG(18:2(9Z,12Z)/18:0)	HMDB=HMDB0010634,ChEBI=CHEBI:75163;CHEBI:60426;CHEBI:75385;CHEBI:84525,YMDB=YMDB01214,FooDB=FDB027784,BMDB=BMDB10634,LipidMAPS=LMGP04010033;LMGP04010985,Serum=HMDB0010634	HMDB=HMDB0010605,ChEBI=CHEBI:89266,FooDB=FDB027755,BMDB=BMDB10605,LipidMAPS=LMGP04010982,Serum=HMDB0010605	HMDB=HMDB0010647,ChEBI=CHEBI:89353,FooDB=FDB027797,BMDB=BMDB10647,LipidMAPS=LMGP04010876,Serum=HMDB0010647	C42H79O10P	C42H79O10P	C42H79O10P	8.3567	8.3517	8.3517
Negative	774.505	12.6	253.2561:1294 281.23047:62 478.27515:172 593.74994:58 714.25134:36238 715.40948:123	[M-H]-			yes	0.00077315	-12.711	0.00036097	-12.848	Phospholipid	Phosphatidylcholines	Phosphatidylcholines	Phosphatidylcholines	PC(18:4(6Z,9Z,12Z,15Z)/18:3(9Z,12Z,15Z))	PC(18:4(6Z,9Z,12Z,15Z)/18:3(6Z,9Z,12Z))	PC(14:1(9Z)/22:6(4Z,7Z,10Z,13Z,16Z,19Z))	HMDB=HMDB0008239,FooDB=FDB025429,BMDB=BMDB08239,LipidMAPS=LMGP01011715	HMDB=HMDB0008238,FooDB=FDB025428,BMDB=BMDB08238,LipidMAPS=LMGP01011714	HMDB=HMDB0007925,FooDB=FDB025117,BMDB=BMDB07925,LipidMAPS=LMGP01011408	C44H74NO8P	C44H74NO8P	C44H74NO8P	6.602	6.602	6.602
Negative	776.52	12.61	253.28442:742 255.26054:511 281.32916:101 480.1781:123 716.21625:32046 716.97571:181	[M-H]-	yes	yes	yes	0.09406	-11.948	8.7394e-05	-12.785	Phospholipid	Phosphatidylcholines	Phosphatidylcholines	Phosphatidylcholines	PC(18:4(6Z,9Z,12Z,15Z)/18:2(9Z,12Z))	PC(16:1(9Z)/20:5(5Z,8Z,11Z,14Z,17Z))	PC(14:1(9Z)/22:5(7Z,10Z,13Z,16Z,19Z))	HMDB=HMDB0008237,ChEBI=CHEBI:89419,YMDB=YMDB02025,FooDB=FDB025427,BMDB=BMDB08237,LipidMAPS=LMGP01011713,Urine=HMDB0008237,Serum=HMDB0008237	HMDB=HMDB0008017,ChEBI=CHEBI:89739,YMDB=YMDB01877,FooDB=FDB025208,BMDB=BMDB08017,LipidMAPS=LMGP01011492,Urine=HMDB0008017,Serum=HMDB0008017	HMDB=HMDB0007924,ChEBI=CHEBI:88929,YMDB=YMDB01842,FooDB=FDB025116,BMDB=BMDB07924,LipidMAPS=LMGP01012135,Urine=HMDB0007924,Serum=HMDB0007924	C44H76NO8P	C44H76NO8P	C44H76NO8P	6.131	6.131	6.131
Positive	778.515	10.15	495.16925:73 524.35992:106 592.76813:71 691.54218:86	[M+H]+			yes	0.0038158	-9.3928	0.0031941	-9.3894	No annotation
Negative	779.206	15.03	341.0062:83 383.07721:53 485.17291:64 617.23541:96 665.19159:6141	[M-H]-			yes	0.00028389	10.921	0.0032799	10.971	No annotation
Positive	780.528	12.74	237.01349:67 265.39633:105 439.16882:459 467.04303:504 476.22302:260 526.36493:963 575.34949:3698 597.47021:28953 715.36298:65 721.21478:58176 721.8783:467	[M+H]+		yes	yes	0.07267	-10.297	0.00019092	-11.006	Other	Sulfatides			3-O-Sulfogalactosylceramide (d18:1/16:0)			HMDB=HMDB0012313,ChEBI=CHEBI:60366,FooDB=FDB028935,BMDB=BMDB12313,LipidMAPS=LMSP06020002,PubChem=9897094			C40H77NO11S			7.2764
Positive	780.53	12.42	494.05792:174 523.36859:82 526.31207:102 597.02155:91 691.57037:68 720.42987:96 721.35089:142	[M+H]+			yes	0.0021597	-10.754	0.00048994	-10.594	Other	Sulfatides	Phosphoglycosphingolipids		3-O-Sulfogalactosylceramide (d18:1/16:0)	PI-Cer(d20:1/14:0)		HMDB=HMDB0012313,ChEBI=CHEBI:60366,FooDB=FDB028935,BMDB=BMDB12313,LipidMAPS=LMSP06020002,PubChem=9897094	LipidMAPS=LMSP03030151		C40H77NO11S	C40H78NO11P		7.4826	6.4186
Positive	780.553	2.08	438.28265:59 476.39062:92 524.29755:72 526.24457:130 537.00586:74 596.60931:58 597.48199:158 621.16437:101 649.33984:204 650.31256:208 721.39612:504	[M+H]+			yes	2.1599e-05	10.94	8.3999e-05	11.846	Phospholipid	Phosphatidylcholines	Phosphatidylcholines	Phosphatidylcholines	PC(16:1(9Z)/20:4(5Z,8Z,11Z,14Z))	PC(20:4(5Z,8Z,11Z,14Z)/16:1(9Z))	PC(16:1(9Z)/20:4(8Z,11Z,14Z,17Z))	HMDB=HMDB0008015,ChEBI=CHEBI:84816,YMDB=YMDB01875,FooDB=FDB025206,BMDB=BMDB08015,LipidMAPS=LMGP01010695,Saliva=HMDB0008015,Serum=HMDB0008015	HMDB=HMDB0008430,ChEBI=CHEBI:88878,YMDB=YMDB02123,FooDB=FDB025620,BMDB=BMDB08430,LipidMAPS=LMGP01011903,Saliva=HMDB0008430,Serum=HMDB0008430	HMDB=HMDB0008016,ChEBI=CHEBI:89738,YMDB=YMDB01876,FooDB=FDB025207,BMDB=BMDB08016,LipidMAPS=LMGP01012139,Saliva=HMDB0008016,Serum=HMDB0008016	C44H78NO8P	C44H78NO8P	C44H78NO8P	7.6303	7.6303	7.6296
Negative	781.202	19.28	438.71552:63 682.90948:113 720.9726:1397	[M-H]-			yes	0.018923	-7.9639	0.008167	-8.4513	No annotation
Negative	782.471	13.2	253.1915:414 281.29913:420 449.68091:74 478.22375:58 714.26489:11130 763.42853:84	[M-H]-	yes	yes	yes	0.12905	-9.3597	0.0002496	-10.111	Phospholipid	Phosphatidylethanolamines	Phosphatidylethanolamines	Phosphatidylethanolamines	PE(18:4(6Z,9Z,12Z,15Z)/22:6(4Z,7Z,10Z,13Z,16Z,19Z))	PE(22:6(4Z,7Z,10Z,13Z,16Z,19Z)/18:4(6Z,9Z,12Z,15Z))	PE(20:5(5Z,8Z,11Z,14Z,17Z)/20:5(5Z,8Z,11Z,14Z,17Z))	HMDB=HMDB0009210,FooDB=FDB026400,BMDB=BMDB09210,LipidMAPS=LMGP02010768	HMDB=HMDB0009690,FooDB=FDB026880,BMDB=BMDB09690,LipidMAPS=LMGP02011147	HMDB=HMDB0009467,FooDB=FDB026657,BMDB=BMDB09467,LipidMAPS=LMGP02010985	C45H70NO8P	C45H70NO8P	C45H70NO8P	7.6723	7.6723	7.6723
Positive	782.544	11.81	439.05951:69 441.43945:136 467.11804:128 478.15692:101 504.15326:61 526.23865:97 577.39557:1296 599.45074:7786 723.21271:17308 764.4361:58	[M+H]+		yes	yes	0.061056	-7.9481	0.0015136	-9.4935	No annotation
Positive	782.545	12.33	411.26941:53 504.38452:64 526.28748:79 577.43311:545 599.33191:2883 599.94586:60 723.19391:6789	[M+H]+			yes	0.033331	-9.2828	0.00093101	-9.9318	Sphingolipid	Phosphosphingolipids	Phosphosphingolipids		Ins-1-P-Cer(d20:0/14:0)(1-)	Ins-1-P-Cer(d18:0/16:0)(1-)		ChEBI=CHEBI:72553,LipidMAPS=LMSP03030152	ChEBI=CHEBI:72547,LipidMAPS=LMSP03030006		C40H80NO11P	C40H80NO11P		6.3722	6.3065
Positive	784.561	13.04	502.26251:104 504.1178:94 520.56024:57 600.3974:148 723.50525:290 724.29175:489 725.36871:186	[M+H]+		yes	yes	0.15091	-9.497	0.006853	-10.161	No annotation
Positive	784.585	2.13	262.08234:57 502.40204:117 504.42743:219 522.45844:101 599.54108:154 601.41663:61 643.42157:129 725.25995:82	[M+H]+			yes	3.413e-06	10.961	5.297e-05	11.806	Phospholipid	Phosphatidylcholines	Phosphatidylcholines	Phosphatidylcholines	PC(18:2(9Z,12Z)/18:1(11Z))	PC(18:1(11Z)/18:2(9Z,12Z))	PC(18:1(9Z)/18:2(9Z,12Z))	HMDB=HMDB0008136,ChEBI=CHEBI:89599,YMDB=YMDB01959,FooDB=FDB025326,BMDB=BMDB08136,LipidMAPS=LMGP01012168,Urine=HMDB0008136,Saliva=HMDB0008136,Serum=HMDB0008136	HMDB=HMDB0008072,ChEBI=CHEBI:89691,YMDB=YMDB01913,FooDB=FDB025263,BMDB=BMDB08072,LipidMAPS=LMGP01012149,Urine=HMDB0008072,Saliva=HMDB0008072,Serum=HMDB0008072	HMDB=HMDB0008105,ChEBI=CHEBI:74670,YMDB=YMDB01937,FooDB=FDB025295;FDB030211,BMDB=BMDB08105,LipidMAPS=LMGP01010895,Urine=HMDB0008105,Saliva=HMDB0008105,Serum=HMDB0008105,PubChem=24778939;15151374,PlantCyc=CPD-8091	C44H82NO8P	C44H82NO8P	C44H82NO8P	7.8037	7.8033	7.7934
Negative	785.449	7.81	418.04272:54 636.64178:66 696.66394:116 697.32812:584 698.42242:281 716.5451:119 766.77612:77	[M-H]-			yes	0.00099457	-10.326	0.0003624	-10.724	No annotation
Negative	785.475	5.41	425.26636:51	[M-H]-			yes	0.00055509	-9.7391	1.0877e-05	-9.9591	Terpenoid	Triterpene saponins	Triterpenoids		Majonoside R2	Vinaginsenoside R11		HMDB=HMDB0040418,FooDB=FDB020150,UNPD=UNPD103241;UNPD138709;UNPD142689;UNPD186019;UNPD76029	HMDB=HMDB0040781,FooDB=FDB020597,UNPD=UNPD154130;UNPD173420		C41H70O14	C41H70O14		6.0978	6.0978
Negative	786.529	5.65	279.29333:276 281.22281:14031 282.32013:285 283.37607:374 415.31891:147 417.08087:22091 418.16541:382 419.27325:282 435.09369:6493 436.22284:72 437.31299:150 521.78473:76 697.15778:171 699.16125:77251 699.95148:420	[M-H]-			yes	0.00045671	-11.292	2.3056e-05	-7.5349	Phospholipid	Phosphatidylserines	Phosphatidylserines	Phosphatidylserines	PS(18:1(9Z)/18:1(9Z))	PS(18:0/18:2(9Z,12Z))	PS(18:2(9Z,12Z)/18:0)	HMDB=HMDB0012390,ChEBI=CHEBI:60568;CHEBI:74905,YMDB=YMDB01259,FooDB=FDB029006,BMDB=BMDB12390,LipidMAPS=LMGP03010030,Serum=HMDB0012390	HMDB=HMDB0012380,ChEBI=CHEBI:84466;CHEBI:84513,FooDB=FDB028997,BMDB=BMDB12380,LipidMAPS=LMGP03010031,Serum=HMDB0012380	HMDB=HMDB0012400,ChEBI=CHEBI:88485,FooDB=FDB029016,BMDB=BMDB12400,LipidMAPS=LMGP03010876,Serum=HMDB0012400	C42H78NO10P	C42H78NO10P	C42H78NO10P	8.1287	8.1273	8.1273
Positive	786.577	12	439.19489:53 441.30365:53 461.08179:68 463.32855:57 504.27979:181 506.29022:71 614.36798:54 725.66815:95 726.35468:324 768.10767:66	[M+H]+		yes	yes	0.13229	-8.7821	0.0012968	-10.386	No annotation
Positive	786.601	2.18	502.53607:67 504.40747:319 522.20721:103 602.80249:62 645.55347:65	[M+H]+			yes	1.1663e-05	9.1177	0.0012968	9.3035	Phospholipid	Phosphatidylcholines	Phosphatidylcholines	Phosphatidylcholines	PC(14:1(9Z)/22:1(13Z))	PC(22:1(13Z)/14:1(9Z))	PC(16:1(9Z)/20:1(11Z))	HMDB=HMDB0007920,ChEBI=CHEBI:88934,YMDB=YMDB01838,FooDB=FDB025112,BMDB=BMDB07920,LipidMAPS=LMGP01012133,Urine=HMDB0007920,Saliva=HMDB0007920,Serum=HMDB0007920	HMDB=HMDB0008559,ChEBI=CHEBI:88741,YMDB=YMDB02157,FooDB=FDB025749,BMDB=BMDB08559,LipidMAPS=LMGP01012219,Urine=HMDB0008559,Saliva=HMDB0008559,Serum=HMDB0008559	HMDB=HMDB0008011,ChEBI=CHEBI:89737,YMDB=YMDB01871,FooDB=FDB025202,BMDB=BMDB08011,LipidMAPS=LMGP01011489,Urine=HMDB0008011,Saliva=HMDB0008011,Serum=HMDB0008011	C44H84NO8P	C44H84NO8P	C44H84NO8P	7.9537	7.9537	7.9486
Negative	788.545	6.31	253.36935:1470 478.34113:90 641.30811:54 643.35822:85 688.25854:56 701.49847:161 714.21967:74318 714.92889:188 726.11383:147 728.14264:88 729.26874:288	[M-H]-			yes	9.6683e-05	-11.234	7.2125e-05	-11.624	Phospholipid	Phosphatidylserines	Phosphatidylserines	Phosphatidylserines	PS(18:0/18:1(9Z))	PS(18:1(9Z)/18:0)	PS(22:0/14:1(9Z))	HMDB=HMDB0010163,ChEBI=CHEBI:78260;CHEBI:79096,YMDB=YMDB01257,BMDB=BMDB10163,LipidMAPS=LMGP03010025,Serum=HMDB0010163,UNPD=UNPD54560	HMDB=HMDB0012389,ChEBI=CHEBI:74902;CHEBI:75103,BMDB=BMDB12389,LipidMAPS=LMGP03010034,Serum=HMDB0012389	HMDB=HMDB0112708,LipidMAPS=LMGP03010702	C42H80NO10P	C42H80NO10P	C42H80NO10P	5.875	5.875	5.4583
Negative	790.562	6.28	253.25368:746 254.36801:101 255.15547:583 279.31244:285 477.95801:106 480.20203:202 504.02313:73 643.0531:326 643.784:69 669.27161:1233 670.24396:455 713.11676:294 714.19489:255 716.20953:48996 717.00909:65 728.30481:619 730.65918:232 731.44476:220 776.07532:72	[M-H]-			yes	3.9234e-05	-10.834	5.2479e-06	-11.241	Phospholipid	Phosphatidylserines	Phosphatidylserines	Phosphatidylserines	PS(18:0/18:0)	PS(16:0/20:0)	PS(22:0/14:0)	HMDB=HMDB0012378,ChEBI=CHEBI:84519,FooDB=FDB028996,BMDB=BMDB12378,LipidMAPS=LMGP03010036,Serum=HMDB0012378	HMDB=HMDB0112345,LipidMAPS=LMGP03010035	HMDB=HMDB0112707,LipidMAPS=LMGP03010848	C42H82NO10P	C42H82NO10P	C42H82NO10P	6.23	5.8133	5.8133
Negative	792.861	16.4	248.93134:1896 384.35114:201 384.98376:2494 426.96503:409 520.78381:33971 521.43665:193 656.71771:24966 657.35748:266 678.69574:91	[M-H]-			yes	0.0053805	11.056	0.19409	11.634	No annotation
Negative	792.874	13.05	253.24597:475 279.05704:221 281.17471:1196 478.21564:224 506.2691:108 715.40076:71 771.44855:56 772.91364:118	[M-H]-			yes	0.0042689	-9.3009	0.00066708	-9.9264	No annotation
Negative	800.52	12.85	253.07614:152 279.28131:237 740.28125:8388 742.58459:60	[M-H]-			yes	0.0010959	-10.775	0.00051252	-10.775	Phospholipid	Phosphatidylcholines	Phosphatidylcholines	Phosphatidylcholines	PC(20:5(5Z,8Z,11Z,14Z,17Z)/18:3(6Z,9Z,12Z))	PC(20:4(5Z,8Z,11Z,14Z)/18:4(6Z,9Z,12Z,15Z))	PC(18:3(9Z,12Z,15Z)/20:5(5Z,8Z,11Z,14Z,17Z))	HMDB=HMDB0008501,FooDB=FDB025691,BMDB=BMDB08501,LipidMAPS=LMGP01011939	HMDB=HMDB0008437,FooDB=FDB025627,BMDB=BMDB08437,LipidMAPS=LMGP01011912	HMDB=HMDB0008215,FooDB=FDB025405,BMDB=BMDB08215,LipidMAPS=LMGP01011693	C46H76NO8P	C46H76NO8P	C46H76NO8P	7.2774	7.2774	7.2774
Negative	802.535	12.71	253.1678:491 281.14066:941 478.22552:155 506.17346:89 671.45782:51 725.98755:81 742.29614:37767 743.02625:162	[M-H]-	yes	yes	yes	0.12905	-12.132	5.7606e-05	-13.025	Phospholipid	Phosphatidylcholines	Phosphatidylcholines	Phosphatidylcholines	PC(16:1(9Z)/22:6(4Z,7Z,10Z,13Z,16Z,19Z))	PC(18:3(9Z,12Z,15Z)/20:4(5Z,8Z,11Z,14Z))	PC(18:2(9Z,12Z)/20:5(5Z,8Z,11Z,14Z,17Z))	HMDB=HMDB0008023,FooDB=FDB025214,BMDB=BMDB08023,LipidMAPS=LMGP01010696	HMDB=HMDB0008213,FooDB=FDB025403,BMDB=BMDB08213,LipidMAPS=LMGP01011692	HMDB=HMDB0008149,FooDB=FDB025339,BMDB=BMDB08149,LipidMAPS=LMGP01011634	C46H78NO8P	C46H78NO8P	C46H78NO8P	7.3626	7.3626	7.3626
Negative	802.536	13.31	279.3114:170 507.33893:96 508.16425:115 715.07153:60 738.12781:59 741.4679:1099 742.30011:5094 743.22314:160 744.2901:82 781.6814:57	[M-H]-	yes	yes	yes	0.12745	-8.5319	0.00039031	-9.152	Phospholipid	Phosphatidylcholines	Phosphatidylcholines	Phosphatidylcholines	PC(18:3(9Z,12Z,15Z)/20:4(5Z,8Z,11Z,14Z))	PC(18:2(9Z,12Z)/20:5(5Z,8Z,11Z,14Z,17Z))	PC(20:3(8Z,11Z,14Z)/18:4(6Z,9Z,12Z,15Z))	HMDB=HMDB0008213,FooDB=FDB025403,BMDB=BMDB08213,LipidMAPS=LMGP01011692	HMDB=HMDB0008149,FooDB=FDB025339,BMDB=BMDB08149,LipidMAPS=LMGP01011634	HMDB=HMDB0008405,FooDB=FDB025595,BMDB=BMDB08405,LipidMAPS=LMGP01011882	C46H78NO8P	C46H78NO8P	C46H78NO8P	7.1952	7.1952	7.1952
Negative	804.551	11.77	253.34085:50 255.27086:304 281.23807:518 506.35822:92 744.32501:19663 745.1319:193	[M-H]-		yes	yes	0.24474	-4.4717	0.0015881	-12.52	No annotation
Negative	807.477	13.35	240.97862:430 253.23952:603 255.12207:1354 279.20526:194 280.73007:77 281.40924:88 296.94098:421 315.14941:109 389.12634:159 391.12683:884 417.19855:250 433.2868:54 435.1839:123 437.00763:68 438.43738:100 439.36823:73 497.146:89 524.97827:65 551.28241:386 553.1698:1769 571.26215:466 578.9245:88 646.17206:151 719.19305:1257 720.26862:415 745.9953:110 788.3291:135	[M-H]-			yes	0.00057619	-9.2884	0.0049945	-9.4367	Glycoside	Aminoglycosides			N-Monodemethyl roxithromycin			HMDB=HMDB0060845,Urine=HMDB0060845,Serum=HMDB0060845			C39H72N2O15			6.1285
Negative	808.509	5.66	241.17987:82 253.19543:133 254.52303:116 255.28621:357 256.18466:269 281.19086:1860 282.52875:56 283.32327:431 297.01712:81 298.0127:84 300.99835:94 303.2626:850 314.98318:51 389.0863:102 390.17053:66 391.09497:359 391.96906:50 417.06744:3894 418.39447:127 419.24878:909 435.09216:1050 436.58038:203 437.23132:495 439.05328:1896 441.22742:56 455.08185:59 457.07202:255 544.16638:76 551.17499:103 551…	[M-H]-			yes	2.1103e-05	-10.412	1.5934e-05	-10.619	Phospholipid	Phosphatidylserines	Phosphatidylserines	Phosphatidylserines	PS(20:4(5Z,8Z,11Z,14Z)/18:1(9Z))	PS(18:1(9Z)/20:4(5Z,8Z,11Z,14Z))	PS(20:3(8Z,11Z,14Z)/18:2(9Z,12Z))	HMDB=HMDB0012434,ChEBI=CHEBI:88537,FooDB=FDB029050,BMDB=BMDB12434,LipidMAPS=LMGP03010631,Serum=HMDB0012434	HMDB=HMDB0012394,ChEBI=CHEBI:74897;CHEBI:75099,FooDB=FDB029010,BMDB=BMDB12394,LipidMAPS=LMGP03010879,Serum=HMDB0012394	HMDB=HMDB0012424,ChEBI=CHEBI:88521,FooDB=FDB029040,BMDB=BMDB12424,LipidMAPS=LMGP03010602,Serum=HMDB0012424	C44H76NO10P	C44H76NO10P	C44H76NO10P	7.4966	7.4966	7.4163
Negative	808.834	16.33	248.98969:735 384.95013:1109 426.86798:146 520.36914:919 520.99341:11478 536.75067:792 656.71631:15697 672.13519:372 672.76459:1115 694.51709:54	[M-H]-			yes	0.004394	9.746	0.15458	11.037	No annotation
Negative	809.516	5.55	259.26376:59 281.21313:411 282.2049:236 283.43768:71 284.38693:81 302.72745:69 303.55939:92 304.24988:61 417.03857:543 418.05811:687 418.94202:140 435.1756:209 436.10547:233 437.28314:96 438.41235:247 439.0744:234 440.0957:255 456.94781:161 721.49078:1670 722.24689:5071 723.40698:87	[M-H]-			yes	0.00055454	-8.9021	9.6008e-05	-9.3214	Phospholipid	Phosphatidylinositols	Phosphatidylinositols	Phosphatidylinositols	PI(16:0/16:0)	PI(19:0/13:0)	PI(13:0/19:0)	HMDB=HMDB0009778,ChEBI=CHEBI:72835;CHEBI:73229,SMPDB=PW_C005826,YMDB=YMDB01234,FooDB=FDB026968,BMDB=BMDB09778,LipidMAPS=LMGP06010007	LipidMAPS=LMGP06010841	LipidMAPS=LMGP06010906	C41H79O13P	C41H79O13P	C41H79O13P	7.046	6.234	6.234
Negative	816.576	6.16	253.33244:403 254.8605:123 255.53345:116 279.34998:170 281.42325:1221 303.22546:132 478.17682:115 506.16248:52 669.26929:111 695.23846:178 696.24957:129 742.20575:73781 742.86639:158 754.22687:242 756.75861:193 757.41357:294	[M-H]-			yes	2.3839e-05	-11.296	3.1191e-07	-11.718	Phospholipid	Phosphatidylserines	Phosphatidylserines	Phosphatidylserines	PS(22:0/16:1(9Z))	PS(18:1(9Z)/20:0)	PS(20:1(11Z)/18:0)	HMDB=HMDB0112711,LipidMAPS=LMGP03010706	HMDB=HMDB0112411,LipidMAPS=LMGP03010957	HMDB=HMDB0112545,LipidMAPS=LMGP03010539	C44H84NO10P	C44H84NO10P	C44H84NO10P	5.6393	5.6393	5.6393
Negative	822.504	10.19	279.73621:51 301.25467:93 478.33722:96 761.71051:284 762.34003:5270 763.17194:54	[M-H]-			yes	0.0075265	-10.515	0.0050647	-10.587	Phospholipid	Monomethylphosphatidylethanolamines	Monomethylphosphatidylethanolamines		PE-NMe(22:6(4Z,7Z,10Z,13Z,16Z,19Z)/20:5(5Z,8Z,11Z,14Z,17Z))	PE-NMe(20:5(5Z,8Z,11Z,14Z,17Z)/22:6(4Z,7Z,10Z,13Z,16Z,19Z))		HMDB=HMDB0113691	HMDB=HMDB0113505		C48H74NO8P	C48H74NO8P		6.401	6.401
Negative	824.519	12.42	253.29602:84 281.3949:66 303.22516:340 478.27148:73 734.07391:58 756.22046:197 764.19391:8265	[M-H]-			yes	0.0040886	-11.243	0.00155	-11.208	Phospholipid	Phosphatidylcholines	Phosphatidylcholines	Phosphatidylcholines	PC(18:4(6Z,9Z,12Z,15Z)/22:6(4Z,7Z,10Z,13Z,16Z,19Z))	PC(22:6(4Z,7Z,10Z,13Z,16Z,19Z)/18:4(6Z,9Z,12Z,15Z))	PC(20:5(5Z,8Z,11Z,14Z,17Z)/20:5(5Z,8Z,11Z,14Z,17Z))	HMDB=HMDB0008255,FooDB=FDB025445,BMDB=BMDB08255,LipidMAPS=LMGP01011730	HMDB=HMDB0008733,FooDB=FDB025923,BMDB=BMDB08733,LipidMAPS=LMGP01012112	HMDB=HMDB0008511,FooDB=FDB025701,BMDB=BMDB08511,LipidMAPS=LMGP01011949,UNPD=UNPD215606	C48H76NO8P	C48H76NO8P	C48H76NO8P	5.3663	5.3663	5.3663
Negative	824.807	16.26	249.0631:129 384.94357:638 520.80402:2507 536.59607:1575 552.5943:52 672.50519:4123 688.45367:81 710.8327:55	[M-H]-			yes	0.0004245	8.7067	0.1101	9.9497	No annotation
Negative	826.534	12.36	303.01123:146 480.33905:53 740.81708:67 758.08893:126 765.24713:1654 766.32806:4862	[M-H]-	yes	yes	yes	0.070451	-9.8195	0.0016014	-10.285	Phospholipid	Phosphatidylcholines	Phosphatidylcholines	Phosphatidylcholines	PC(20:5(5Z,8Z,11Z,14Z,17Z)/20:4(5Z,8Z,11Z,14Z))	PC(20:4(5Z,8Z,11Z,14Z)/20:5(5Z,8Z,11Z,14Z,17Z))	PC(18:3(6Z,9Z,12Z)/22:6(4Z,7Z,10Z,13Z,16Z,19Z))	HMDB=HMDB0008509,FooDB=FDB025699,BMDB=BMDB08509,LipidMAPS=LMGP01011948	HMDB=HMDB0008445,FooDB=FDB025635,BMDB=BMDB08445,LipidMAPS=LMGP01011919	HMDB=HMDB0008189,FooDB=FDB025379,BMDB=BMDB08189,LipidMAPS=LMGP01011670	C48H78NO8P	C48H78NO8P	C48H78NO8P	7.36	7.36	7.3554
Positive	826.543	5.7	537.12317:74 552.9278:135 738.98761:95	[M+H]+			yes	0.00083166	-10.381	4.5693e-05	-10.619	Phospholipid	Phosphatidylcholines	Phosphatidylcholines	Phosphatidylcholines	PC(18:4(6Z,9Z,12Z,15Z)/22:6(4Z,7Z,10Z,13Z,16Z,19Z))	PC(22:6(4Z,7Z,10Z,13Z,16Z,19Z)/18:4(6Z,9Z,12Z,15Z))	PC(20:5(5Z,8Z,11Z,14Z,17Z)/20:5(5Z,8Z,11Z,14Z,17Z))	HMDB=HMDB0008255,FooDB=FDB025445,BMDB=BMDB08255,LipidMAPS=LMGP01011730	HMDB=HMDB0008733,FooDB=FDB025923,BMDB=BMDB08733,LipidMAPS=LMGP01012112	HMDB=HMDB0008511,FooDB=FDB025701,BMDB=BMDB08511,LipidMAPS=LMGP01011949,UNPD=UNPD215606	C48H76NO8P	C48H76NO8P	C48H76NO8P	6.5392	6.5392	6.5083
Negative	828.5	2.15	303.24341:66 437.15289:113 439.19965:135 741.3656:1269	[M-H]-			yes	2.3839e-05	11.253	0.023766	11.747	No annotation
Negative	830.498	5.52	259.297:183 303.32455:2463 304.38351:52 389.00916:83 437.22528:198 439.07336:6329 440.25934:80 441.16223:164 457.13361:1689 551.16425:54 601.38116:54 741.56995:198 743.19666:19778	[M-H]-			yes	0.0018573	-9.5829	0.00033083	-7.3095	Phospholipid	Phosphatidylserines	Phosphatidylserines	Phosphatidylserines	PS(20:4(5Z,8Z,11Z,14Z)/20:4(5Z,8Z,11Z,14Z))	PS(20:3(8Z,11Z,14Z)/20:5(5Z,8Z,11Z,14Z,17Z))	PS(20:5(5Z,8Z,11Z,14Z,17Z)/20:3(8Z,11Z,14Z))	HMDB=HMDB0012438,FooDB=FDB029054,BMDB=BMDB12438,LipidMAPS=LMGP03010858	HMDB=HMDB0116767,LipidMAPS=LMGP03010613	HMDB=HMDB0112694,LipidMAPS=LMGP03010669	C46H74NO10P	C46H74NO10P	C46H74NO10P	6.9604	6.9599	6.9599
Negative	830.567	11.96	281.17065:217 770.20807:4649 770.87384:103	[M-H]-	yes	yes	yes	0.37632	-1.5266	0.0017972	-11.019	Phospholipid	Phosphatidylcholines	Phosphatidylcholines	Phosphatidylcholines	PC(18:1(9Z)/22:6(4Z,7Z,10Z,13Z,16Z,19Z))	PC(18:1(11Z)/22:6(4Z,7Z,10Z,13Z,16Z,19Z))	PC(20:5(5Z,8Z,11Z,14Z,17Z)/20:2(11Z,14Z))	HMDB=HMDB0008123,ChEBI=CHEBI:84814,FooDB=FDB025313,BMDB=BMDB08123,LipidMAPS=LMGP01010913	HMDB=HMDB0008090,ChEBI=CHEBI:84812,FooDB=FDB025281,BMDB=BMDB08090,LipidMAPS=LMGP01010847	HMDB=HMDB0008506,FooDB=FDB025696,BMDB=BMDB08506,LipidMAPS=LMGP01011946	C48H82NO8P	C48H82NO8P	C48H82NO8P	6.002	6.002	5.5853
Positive	832.51	5.46	269.2916:324 285.06955:63 287.11969:120 338.88437:50 343.30865:111 355.12732:112 361.1207:1330 521.18878:59 527.97186:97 535.18304:132 545.99274:75 547.2384:81 561.31134:347 572.8844:91 575.32562:234 645.17535:96 647.11493:14871 734.38434:466 814.84821:94	[M+H]+			yes	0.0011412	-9.9576	1.1963e-05	-8.8457	Phospholipid	Phosphatidylserines	Phosphatidylserines	Phosphatidylserines	PS(22:4(7Z,10Z,13Z,16Z)/18:4(6Z,9Z,12Z,15Z))	PS(18:4(6Z,9Z,12Z,15Z)/22:4(7Z,10Z,13Z,16Z))	PS(20:3(8Z,11Z,14Z)/20:5(5Z,8Z,11Z,14Z,17Z))	HMDB=HMDB0112799,LipidMAPS=LMGP03010803	HMDB=HMDB0112506,LipidMAPS=LMGP03010454	HMDB=HMDB0116767,LipidMAPS=LMGP03010613	C46H74NO10P	C46H74NO10P	C46H74NO10P	7.0799	7.0799	7.0595
Negative	833.493	13.37	241.08057:559 253.13458:1026 255.22476:203 259.02383:82 279.0882:231 281.15271:2379 297.07196:587 315.02893:89 389.10535:656 390.6897:83 391.2901:86 409.23242:51 417.18268:1282 435.25592:56 439.19147:56 439.9895:51 459.33099:118 551.27173:1157 553.15918:320 554.13263:58 569.15497:328 577.28809:87 579.25885:2068 597.17688:361 671.37384:66 672.41718:257 673.31702:152 744.86945:196 745.51508:283 746…	[M-H]-			yes	0.0095611	-10.177	1.0679e-05	-10.53	Terpenoid	Triterpenoids			Notoginsenoside J			HMDB=HMDB0031757,KNApSAcK=C00030848,FooDB=FDB008428;FDB013145;FDB013146,UNPD=UNPD118239;UNPD208531;UNPD84751			C42H74O16			6.3135
Negative	833.519	5.62	241.05824:3754 253.19469:4979 254.53305:256 255.28633:2555 258.99109:612 260.92105:194 279.32117:1484 281.1539:12211 282.40369:273 297.04523:3473 297.86273:54 303.88232:108 306.3092:62 314.90829:1140 388.98792:1610 390.55255:402 391.21307:1933 407.04895:150 409.00562:75 415.13342:497 417.0647:5226 418.26965:296 434.24274:60 435.14331:142 439.03967:62 440.13177:108 441.75696:74 477.31396:120 497.3…	[M-H]-			yes	1.5983e-05	-11.891	5.5763e-06	-12.098	Phospholipid	Phosphatidylinositols	Phosphatidylinositols	Phosphatidylinositols	PI(16:0/18:2(9Z,12Z))	PI(18:2(9Z,12Z)/16:0)	PI(16:1(9Z)/18:1(9Z))	HMDB=HMDB0009784;HMDB0062653,ChEBI=CHEBI:72838;CHEBI:73212,FooDB=FDB026974,BMDB=BMDB09784,LipidMAPS=LMGP06010959,Serum=HMDB0009784	HMDB=HMDB0009846,ChEBI=CHEBI:88640,FooDB=FDB027036,BMDB=BMDB09846,LipidMAPS=LMGP06010847,Serum=HMDB0009846	HMDB=HMDB0009801,ChEBI=CHEBI:88562,YMDB=YMDB01239,FooDB=FDB026991,BMDB=BMDB09801,LipidMAPS=LMGP06010873,Serum=HMDB0009801	C43H79O13P	C43H79O13P	C43H79O13P	7.9658	7.9658	7.9572
Negative	838.561	6.07	279.19443:51 301.2886:80 303.24225:398 478.18323:53 740.49237:66 762.6239:137 764.27448:27318 764.9433:140 776.00995:286 778.65698:209 779.34692:151	[M-H]-			yes	0.00032758	-9.2202	0.00012527	-9.5814	Phospholipid	Phosphatidylserines	Phosphatidylserines	Phosphatidylserines	PS(18:0/22:4(7Z,10Z,13Z,16Z))	PS(22:2(13Z,16Z)/18:2(9Z,12Z))	PS(20:4(5Z,8Z,11Z,14Z)/20:0)	HMDB=HMDB0112382,ChEBI=CHEBI:84506,LipidMAPS=LMGP03010883	HMDB=HMDB0112769,LipidMAPS=LMGP03010769	HMDB=HMDB0112640,LipidMAPS=LMGP03010638	C46H82NO10P	C46H82NO10P	C46H82NO10P	6.7092	6.2925	6.2925
Negative	844.506	12.56	457.04028:57 506.33057:52 774.69354:76 825.02429:63	[M-H]-		yes	yes	0.099483	-8.2992	0.00012502	-9.3623	No annotation
Negative	844.609	6.05	281.18082:684 506.20599:64 682.40265:64 697.28278:317 723.19385:526 724.13892:193 744.45557:104 767.36713:134 770.22577:24716 770.94427:172 781.54559:155 782.32849:730 785.10577:171 792.12842:107 792.76953:71 794.34796:71	[M-H]-			yes	0.00021375	-8.9581	0.00011331	-9.4987	Phospholipid	Phosphatidylserines	Phosphatidylserines	Phosphatidylserines	PS(20:0/20:1(11Z))	PS(18:1(9Z)/22:0)	PS(20:1(11Z)/20:0)	HMDB=HMDB0112524,LipidMAPS=LMGP03010948	HMDB=HMDB0112417,LipidMAPS=LMGP03010955	HMDB=HMDB0112551,LipidMAPS=LMGP03010547	C46H88NO10P	C46H88NO10P	C46H88NO10P	5.5373	5.5373	5.5373
Negative	870.546	2.21	417.33069:63 671.37219:139 697.46368:478 698.32196:136 741.17908:168 742.29498:119 756.54871:143	[M-H]-			yes	4.8283e-05	10.187	0.0017231	10.841	No annotation
Positive	874.542	5.52	299.09549:127 337.35165:70 575.2226:160 576.06952:73 577.23309:181 601.53015:196 603.33197:218 689.2428:79 855.81415:65 857.14716:52	[M+H]+			yes	9.0444e-05	-10.132	0.00033083	-10.37	No annotation
Negative	876.561	5.83	253.26741:425 279.08444:173 281.14914:1247 389.13513:58 449.9975:198 478.13177:167 714.25897:6236 715.22778:93 756.27399:590 786.40448:187 858.18341:98 861.39337:50	[M-H]-			yes	0.0013897	-8.3329	0.00070827	-7.9638	Phospholipid	Phosphatidylcholines			PC(22:6(4Z,7Z,10Z,13Z,16Z,19Z)/22:6(4Z,7Z,10Z,13Z,16Z,19Z))			HMDB=HMDB0008748,FooDB=FDB025938,STOFF=STOFF_6650,BMDB=BMDB08748,LipidMAPS=LMGP01011119			C52H80NO8P			7.0314
Positive	878.574	5.78	303.97864:244 573.56305:86 575.21051:2759 575.92474:57 578.70331:61 579.39642:74 605.46442:73 737.72833:55 793.05023:271 794.08014:2359 859.35114:79 860.15106:2928	[M+H]+			yes	0.0029072	-9.9689	0.00033737	-8.1478	Phospholipid	Phosphatidylcholines			PC(22:6(4Z,7Z,10Z,13Z,16Z,19Z)/22:6(4Z,7Z,10Z,13Z,16Z,19Z))			HMDB=HMDB0008748,FooDB=FDB025938,STOFF=STOFF_6650,BMDB=BMDB08748,LipidMAPS=LMGP01011119			C52H80NO8P			5.5438
Positive	880.588	5.55	577.24121:335 579.90704:86 607.50024:59 862.1496:199	[M+H]+			yes	0.001959	-10.158	0.00028324	-8.4218	Phospholipid	Phosphatidylcholines	Phosphatidylcholines	Phosphatidylcholines	PC(22:5(7Z,10Z,13Z,16Z,19Z)/22:6(4Z,7Z,10Z,13Z,16Z,19Z))	PC(22:6(4Z,7Z,10Z,13Z,16Z,19Z)/22:5(4Z,7Z,10Z,13Z,16Z))	PC(22:5(4Z,7Z,10Z,13Z,16Z)/22:6(4Z,7Z,10Z,13Z,16Z,19Z))	HMDB=HMDB0008715,FooDB=FDB025905,BMDB=BMDB08715	HMDB=HMDB0008746,FooDB=FDB025936,BMDB=BMDB08746	HMDB=HMDB0008682,FooDB=FDB025872,BMDB=BMDB08682	C52H82NO8P	C52H82NO8P	C52H82NO8P	5.7868	5.7868	5.7868
Positive	881.731	12.47	577.29688:807 597.06207:231 597.77008:95 599.27527:1613 601.40759:83 603.47333:609 625.38599:1133 796.26678:64 812.74951:87 863.3728:60	[M+H]+			yes	0.0017926	-9.033	8.9456e-05	-9.1207	Glycoside	Steroidal glycosides			22:2-Glc-Campesterol			LipidMAPS=LMST01031141			C56H96O7			5.572
Negative	901.505	8.75	881.11884:93	[M-H]-				0.42282	-1.0487	0.069877	-7.6887	Phospholipid	Phosphatidylglycerophosphates	Phosphatidylglycerophosphates	Phosphatidylglycerophosphates	PGP(18:0/22:6(4Z,7Z,10Z,13Z,16Z,19Z))	PGP(18:2(9Z,12Z)/22:4(7Z,10Z,13Z,16Z))	PGP(22:5(4Z,7Z,10Z,13Z,16Z)/18:1(11Z))	HMDB=HMDB0013516,FooDB=FDB029516	HMDB=HMDB0013558,FooDB=FDB029558	HMDB=HMDB0116491	C46H80O13P2	C46H80O13P2	C46H80O13P2	3.5927	3.5927	3.5927
Negative	928.835	16.41	384.89023:123 520.7265:1848 656.63556:5544 657.27252:83 792.60107:3542 793.28766:82	[M-H]-			yes	0.0032098	7.6517	0.19001	9.8185	No annotation
Negative	944.81	16.36	384.71844:83 520.84668:845 656.64532:2346 672.53815:380 792.62421:1987 807.93127:62 808.76678:213	[M-H]-			yes	0.0021597	8.411	0.15958	7.8412	No annotation
Negative	957.566	9.77	936.92767:57	[M-H]-			yes	0.032949	-10.42	0.026032	-8.5739	No annotation
Negative	999.61	9.79	478.16769:290	[M-H]-			yes	0.045382	-9.4937	0.071666	-7.4902	No annotation
Positive	1143.76	7.82	819.93066:52	[M+H]+			yes	0.0011374	-11.33	0.0027647	-11.451	No annotation
Positive	1418.02	6.32	730.22046:185	[M+H]+			yes	0.000554	-10.046	0.00033081	-10.368	No annotation
Positive	1422.05	6.3	733.37109:53	[M+H]+			yes	0.0011764	-10.726	1.1963e-05	-10.97	No annotation
Positive	1446.05	6.27	730.22485:62	[M+H]+			yes	0.000554	-11.556	9.7174e-06	-11.809	No annotation
Positive	1484.02	12.59	569.28662:573 570.43457:203 693.23486:801 694.33667:521 744.31049:166 745.37927:95 752.32593:3241 753.31879:2093	[M+H]+		yes	yes	0.072279	-8.3591	0.00024664	-8.6147	No annotation
Positive	1486.08	6.25	730.1593:1013 732.0694:188 744.22571:229 754.16882:265 756.08252:1147 768.2157:60 770.36475:117 880.56299:85 913.08533:75 938.99097:108	[M+H]+			yes	3.0658e-05	-11.282	0.0001892	-11.455	No annotation
Negative	1494.03	4.51	745.19409:133 746.59705:87	[M-H]-			yes	0.0030012	-8.0373	0.00055186	-8.3828	No annotation
